# Supplementary material
Source: publisher figshare collection journal article supplement (https://acs.figshare.com/ndownloader/files/7263983)
Supplement: Supplementary file 1 [file 7263983]

 
data_heit

# start Validation Reply Form
_vrf_PLAT230_heit
;
RESPONSE: Obtained crystal was optimal and it was weakly diffracting.
;
# end Validation Reply Form
 
_audit_creation_method            'SHELXL-2014/7'
_shelx_SHELXL_version_number      '2014/7'
_chemical_name_systematic         ?
_chemical_name_common             ?
_chemical_melting_point           ?
_chemical_formula_moiety          'C32 H38 N4'
_chemical_formula_sum             'C32 H38 N4' 
_chemical_formula_weight          478.66

loop_
 _atom_type_symbol
 _atom_type_description
 _atom_type_scat_dispersion_real
 _atom_type_scat_dispersion_imag
 _atom_type_scat_source
 'C'  'C'   0.0033   0.0016
 'International Tables Vol C Tables 4.2.6.8 and 6.1.1.4'
 'H'  'H'   0.0000   0.0000
 'International Tables Vol C Tables 4.2.6.8 and 6.1.1.4'
 'N'  'N'   0.0061   0.0033
 'International Tables Vol C Tables 4.2.6.8 and 6.1.1.4'
 
_space_group_crystal_system       monoclinic
_space_group_IT_number            14
_space_group_name_H-M_alt         'P 21/n'
_space_group_name_Hall            '-P 2yn'
 
_shelx_space_group_comment
;
The symmetry employed for this shelxl refinement is uniquely defined
by the following loop, which should always be used as a source of
symmetry information in preference to the above space-group names.
They are only intended as comments.
;
 
loop_
 _space_group_symop_operation_xyz
 'x, y, z'
 '-x+1/2, y+1/2, -z+1/2'
 '-x, -y, -z'
 'x-1/2, -y-1/2, z-1/2'
 
_cell_length_a                    12.907(14)
_cell_length_b                    5.227(6)
_cell_length_c                    19.57(2)
_cell_angle_alpha                 90
_cell_angle_beta                  99.198(18)
_cell_angle_gamma                 90
_cell_volume                      1303(2)
_cell_formula_units_Z             2
_cell_measurement_temperature     298(2)
_cell_measurement_reflns_used     1538
_cell_measurement_theta_min       3.20
_cell_measurement_theta_max       21.87
 
_exptl_crystal_description        plate
_exptl_crystal_colour             brown
_exptl_crystal_density_meas       ?
_exptl_crystal_density_method     ?
_exptl_crystal_density_diffrn     1.220          
_exptl_crystal_F_000              516
_exptl_transmission_factor_min    ?
_exptl_transmission_factor_max    ?
_exptl_crystal_size_max           0.20
_exptl_crystal_size_mid           0.18
_exptl_crystal_size_min           0.11
_exptl_absorpt_coefficient_mu     0.072
_shelx_estimated_absorpt_T_min    ?
_shelx_estimated_absorpt_T_max    ?
_exptl_absorpt_correction_type    multi-scan
_exptl_absorpt_correction_T_min   0.986
_exptl_absorpt_correction_T_max   0.992
_exptl_absorpt_process_details    'SADABS 2014/5'
_exptl_absorpt_special_details    ?
_diffrn_ambient_temperature       298(2)
_diffrn_radiation_wavelength      0.71073
_diffrn_radiation_type            MoK\a
_diffrn_source                    'sealed tube'
_diffrn_measurement_device_type   'CCD area detector'
_diffrn_measurement_method        'phi and omega scans'
_diffrn_detector_area_resol_mean  ?
_diffrn_reflns_number             10621
_diffrn_reflns_av_unetI/netI      0.0571
_diffrn_reflns_av_R_equivalents   0.0806
_diffrn_reflns_limit_h_min        -15
_diffrn_reflns_limit_h_max        15
_diffrn_reflns_limit_k_min        -6
_diffrn_reflns_limit_k_max        6
_diffrn_reflns_limit_l_min        -23
_diffrn_reflns_limit_l_max        23
_diffrn_reflns_theta_min          1.768
_diffrn_reflns_theta_max          25.023
_diffrn_reflns_theta_full         25.023
_diffrn_measured_fraction_theta_max   0.988
_diffrn_measured_fraction_theta_full  0.988
_diffrn_reflns_Laue_measured_fraction_max    0.988
_diffrn_reflns_Laue_measured_fraction_full   0.988
_diffrn_reflns_point_group_measured_fraction_max   0.988
_diffrn_reflns_point_group_measured_fraction_full  0.988
_reflns_number_total              2273
_reflns_number_gt                 1340
_reflns_threshold_expression      'I > 2\s(I)'
_reflns_Friedel_coverage          0.000
_reflns_Friedel_fraction_max      .
_reflns_Friedel_fraction_full     .
 
_reflns_special_details
;
 Reflections were merged by SHELXL according to the crystal
 class for the calculation of statistics and refinement.
 
 _reflns_Friedel_fraction is defined as the number of unique
 Friedel pairs measured divided by the number that would be
 possible theoretically, ignoring centric projections and
 systematic absences.
;
 
_computing_data_collection        'Bruker SMART'
_computing_cell_refinement        'Bruker SMART'
_computing_data_reduction         'Bruker SMART'
_computing_structure_solution     'Bruker SHELXTL'
_computing_structure_refinement   'SHELXL-2014/7 (Sheldrick, 2014)'
_computing_molecular_graphics     'Bruker SHELXTL'
_computing_publication_material   'Bruker SHELXTL'
_refine_special_details           ?
_refine_ls_structure_factor_coef  Fsqd
_refine_ls_matrix_type            full
_refine_ls_weighting_scheme       calc
_refine_ls_weighting_details
'w=1/[\s^2^(Fo^2^)+(0.1258P)^2^+0.0722P] where P=(Fo^2^+2Fc^2^)/3'
_atom_sites_solution_primary      ?
_atom_sites_solution_secondary    ?
_atom_sites_solution_hydrogens    mixed
_refine_ls_hydrogen_treatment     mixed
_refine_ls_extinction_method      none
_refine_ls_extinction_coef        .
_refine_ls_number_reflns          2273
_refine_ls_number_parameters      170
_refine_ls_number_restraints      0
_refine_ls_R_factor_all           0.1177
_refine_ls_R_factor_gt            0.0723
_refine_ls_wR_factor_ref          0.2323
_refine_ls_wR_factor_gt           0.1980
_refine_ls_goodness_of_fit_ref    1.042
_refine_ls_restrained_S_all       1.042
_refine_ls_shift/su_max           0.000
_refine_ls_shift/su_mean          0.000
 
loop_
 _atom_site_label
 _atom_site_type_symbol
 _atom_site_fract_x
 _atom_site_fract_y
 _atom_site_fract_z
 _atom_site_U_iso_or_equiv
 _atom_site_adp_type
 _atom_site_occupancy
 _atom_site_site_symmetry_order  
 _atom_site_calc_flag
 _atom_site_refinement_flags_posn
 _atom_site_refinement_flags_adp
 _atom_site_refinement_flags_occupancy
 _atom_site_disorder_assembly
 _atom_site_disorder_group
N2 N 0.52419(19) 1.0098(5) 0.09813(12) 0.0571(7) Uani 1 1 d . . . . .
N1 N 0.4026(2) 0.7055(5) 0.00588(13) 0.0589(7) Uani 1 1 d . . . . .
C5 C 0.4969(3) 0.7977(6) 0.19859(16) 0.0599(8) Uani 1 1 d . . . . .
C2 C 0.6559(3) 1.3174(6) 0.15524(18) 0.0682(9) Uani 1 1 d . . . . .
H2 H 0.6868 1.3631 0.1998 0.082 Uiso 1 1 calc R U . . .
C3 C 0.5863(2) 1.1119(6) 0.15404(16) 0.0598(8) Uani 1 1 d . . . . .
C6 C 0.4676(2) 0.8199(5) 0.12314(15) 0.0554(8) Uani 1 1 d . . . . .
C7 C 0.3986(2) 0.6726(5) 0.07496(16) 0.0567(8) Uani 1 1 d . . . . .
C8 C 0.3205(3) 0.4816(6) 0.08006(17) 0.0647(9) Uani 1 1 d . . . . .
C1 C 0.6885(3) 1.4664(7) 0.10485(17) 0.0699(10) Uani 1 1 d . . . . .
H1 H 0.7340 1.5978 0.1219 0.084 Uiso 1 1 calc R U . . .
C10 C 0.3344(3) 0.5441(7) -0.03266(18) 0.0676(9) Uani 1 1 d . . . . .
C4 C 0.5698(3) 0.9810(6) 0.21531(16) 0.0646(9) Uani 1 1 d . . . . .
H4 H 0.6040 1.0167 0.2598 0.078 Uiso 1 1 calc R U . . .
C13 C 0.2716(3) 0.4040(7) 0.14158(18) 0.0763(10) Uani 1 1 d . . . . .
H13A H 0.3266 0.3562 0.1792 0.092 Uiso 1 1 calc R U . . .
H13B H 0.2275 0.2551 0.1296 0.092 Uiso 1 1 calc R U . . .
C11 C 0.4653(3) 0.6079(6) 0.24900(17) 0.0712(10) Uani 1 1 d . . . . .
H11A H 0.4702 0.4371 0.2304 0.085 Uiso 1 1 calc R U . . .
H11B H 0.3924 0.6376 0.2533 0.085 Uiso 1 1 calc R U . . .
C9 C 0.2847(3) 0.3979(7) 0.01409(18) 0.0754(10) Uani 1 1 d . . . . .
C15 C 0.2067(4) 0.1820(10) -0.0069(2) 0.0999(14) Uani 1 1 d . . . . .
H15A H 0.2195 0.1041 -0.0497 0.120 Uiso 1 1 calc R U . . .
H15B H 0.2135 0.0515 0.0288 0.120 Uiso 1 1 calc R U . . .
C12 C 0.5304(4) 0.6186(9) 0.3198(2) 0.1115(16) Uani 1 1 d . . . . .
H12A H 0.6027 0.5880 0.3162 0.167 Uiso 1 1 calc R U . . .
H12B H 0.5066 0.4901 0.3488 0.167 Uiso 1 1 calc R U . . .
H12C H 0.5236 0.7844 0.3397 0.167 Uiso 1 1 calc R U . . .
C14 C 0.2055(3) 0.6174(8) 0.1660(2) 0.0876(12) Uani 1 1 d . . . . .
H14A H 0.2486 0.7657 0.1777 0.131 Uiso 1 1 calc R U . . .
H14B H 0.1776 0.5610 0.2061 0.131 Uiso 1 1 calc R U . . .
H14C H 0.1489 0.6596 0.1297 0.131 Uiso 1 1 calc R U . . .
C16 C 0.1037(4) 0.2926(10) -0.0158(3) 0.1196(17) Uani 1 1 d . . . . .
H16A H 0.0915 0.3660 0.0272 0.179 Uiso 1 1 calc R U . . .
H16B H 0.0523 0.1622 -0.0299 0.179 Uiso 1 1 calc R U . . .
H16C H 0.0984 0.4234 -0.0506 0.179 Uiso 1 1 calc R U . . .
H1X H 0.445(3) 0.814(6) -0.0182(19) 0.080(11) Uiso 1 1 d . . . . .
 
loop_
 _atom_site_aniso_label
 _atom_site_aniso_U_11
 _atom_site_aniso_U_22
 _atom_site_aniso_U_33
 _atom_site_aniso_U_23
 _atom_site_aniso_U_13
 _atom_site_aniso_U_12
N2 0.0564(15) 0.0596(14) 0.0547(17) -0.0035(12) 0.0067(13) 0.0046(12)
N1 0.0634(17) 0.0616(15) 0.0514(16) -0.0024(12) 0.0085(13) 0.0003(14)
C5 0.066(2) 0.0616(18) 0.0507(19) -0.0014(14) 0.0064(15) 0.0098(16)
C2 0.070(2) 0.078(2) 0.055(2) -0.0134(16) 0.0042(16) -0.0066(18)
C3 0.062(2) 0.0622(18) 0.0535(19) -0.0069(15) 0.0050(15) 0.0024(16)
C6 0.0580(19) 0.0567(16) 0.0503(18) -0.0015(14) 0.0046(15) 0.0114(15)
C7 0.0607(19) 0.0576(17) 0.0507(19) -0.0009(14) 0.0056(14) 0.0077(15)
C8 0.077(2) 0.0617(18) 0.055(2) -0.0014(15) 0.0085(17) -0.0049(17)
C1 0.073(2) 0.082(2) 0.054(2) -0.0110(17) 0.0059(17) -0.0163(18)
C10 0.073(2) 0.071(2) 0.058(2) -0.0123(16) 0.0072(17) -0.0065(18)
C4 0.074(2) 0.071(2) 0.0462(19) -0.0058(15) 0.0019(16) 0.0067(17)
C13 0.098(3) 0.071(2) 0.060(2) 0.0042(17) 0.0119(19) -0.018(2)
C11 0.082(2) 0.073(2) 0.056(2) 0.0052(17) 0.0036(17) 0.0018(19)
C9 0.084(3) 0.078(2) 0.063(2) -0.0050(18) 0.0086(19) -0.025(2)
C15 0.092(3) 0.134(4) 0.072(3) 0.008(2) 0.010(2) -0.005(3)
C12 0.134(4) 0.134(4) 0.059(2) 0.026(2) -0.008(2) -0.030(3)
C14 0.099(3) 0.091(3) 0.075(3) 0.009(2) 0.020(2) -0.011(2)
C16 0.141(5) 0.113(3) 0.104(4) -0.014(3) 0.017(3) -0.018(3)
 
_geom_special_details
;
 All esds (except the esd in the dihedral angle between two l.s. planes)
 are estimated using the full covariance matrix.  The cell esds are taken
 into account individually in the estimation of esds in distances, angles
 and torsion angles; correlations between esds in cell parameters are only
 used when they are defined by crystal symmetry.  An approximate (isotropic)
 treatment of cell esds is used for estimating esds involving l.s. planes.
;
 
loop_
 _geom_bond_atom_site_label_1
 _geom_bond_atom_site_label_2
 _geom_bond_distance
 _geom_bond_site_symmetry_2
 _geom_bond_publ_flag
N2 C3 1.358(4) . ?
N2 C6 1.368(4) . ?
N1 C10 1.357(4) . ?
N1 C7 1.372(4) . ?
N1 H1X 0.96(4) . ?
C5 C4 1.346(5) . ?
C5 C6 1.469(4) . ?
C5 C11 1.501(5) . ?
C2 C1 1.374(5) . ?
C2 C3 1.398(5) . ?
C2 H2 0.9300 . ?
C3 C4 1.425(4) . ?
C6 C7 1.417(4) . ?
C7 C8 1.434(4) . ?
C8 C9 1.371(5) . ?
C8 C13 1.502(5) . ?
C1 C10 1.397(5) 3_675 ?
C1 H1 0.9300 . ?
C10 C1 1.397(5) 3_675 ?
C10 C9 1.422(5) . ?
C4 H4 0.9300 . ?
C13 C14 1.526(5) . ?
C13 H13A 0.9700 . ?
C13 H13B 0.9700 . ?
C11 C12 1.503(5) . ?
C11 H11A 0.9700 . ?
C11 H11B 0.9700 . ?
C9 C15 1.524(6) . ?
C15 C16 1.434(6) . ?
C15 H15A 0.9700 . ?
C15 H15B 0.9700 . ?
C12 H12A 0.9600 . ?
C12 H12B 0.9600 . ?
C12 H12C 0.9600 . ?
C14 H14A 0.9600 . ?
C14 H14B 0.9600 . ?
C14 H14C 0.9600 . ?
C16 H16A 0.9600 . ?
C16 H16B 0.9600 . ?
C16 H16C 0.9600 . ?
 
loop_
 _geom_angle_atom_site_label_1
 _geom_angle_atom_site_label_2
 _geom_angle_atom_site_label_3
 _geom_angle
 _geom_angle_site_symmetry_1
 _geom_angle_site_symmetry_3
 _geom_angle_publ_flag
C3 N2 C6 106.1(3) . . ?
C10 N1 C7 110.3(3) . . ?
C10 N1 H1X 118(2) . . ?
C7 N1 H1X 132(2) . . ?
C4 C5 C6 104.2(3) . . ?
C4 C5 C11 124.3(3) . . ?
C6 C5 C11 131.3(3) . . ?
C1 C2 C3 133.9(3) . . ?
C1 C2 H2 113.1 . . ?
C3 C2 H2 113.1 . . ?
N2 C3 C2 127.6(3) . . ?
N2 C3 C4 109.9(3) . . ?
C2 C3 C4 122.5(3) . . ?
N2 C6 C7 118.1(3) . . ?
N2 C6 C5 110.5(3) . . ?
C7 C6 C5 131.3(3) . . ?
N1 C7 C6 118.0(3) . . ?
N1 C7 C8 107.1(3) . . ?
C6 C7 C8 135.0(3) . . ?
C9 C8 C7 106.9(3) . . ?
C9 C8 C13 123.2(3) . . ?
C7 C8 C13 129.4(3) . . ?
C2 C1 C10 131.5(3) . 3_675 ?
C2 C1 H1 114.2 . . ?
C10 C1 H1 114.2 3_675 . ?
N1 C10 C1 126.9(3) . 3_675 ?
N1 C10 C9 107.2(3) . . ?
C1 C10 C9 125.8(3) 3_675 . ?
C5 C4 C3 109.3(3) . . ?
C5 C4 H4 125.4 . . ?
C3 C4 H4 125.4 . . ?
C8 C13 C14 112.4(3) . . ?
C8 C13 H13A 109.1 . . ?
C14 C13 H13A 109.1 . . ?
C8 C13 H13B 109.1 . . ?
C14 C13 H13B 109.1 . . ?
H13A C13 H13B 107.9 . . ?
C5 C11 C12 114.2(3) . . ?
C5 C11 H11A 108.7 . . ?
C12 C11 H11A 108.7 . . ?
C5 C11 H11B 108.7 . . ?
C12 C11 H11B 108.7 . . ?
H11A C11 H11B 107.6 . . ?
C8 C9 C10 108.4(3) . . ?
C8 C9 C15 126.7(3) . . ?
C10 C9 C15 124.9(3) . . ?
C16 C15 C9 107.1(4) . . ?
C16 C15 H15A 110.3 . . ?
C9 C15 H15A 110.3 . . ?
C16 C15 H15B 110.3 . . ?
C9 C15 H15B 110.3 . . ?
H15A C15 H15B 108.5 . . ?
C11 C12 H12A 109.5 . . ?
C11 C12 H12B 109.5 . . ?
H12A C12 H12B 109.5 . . ?
C11 C12 H12C 109.5 . . ?
H12A C12 H12C 109.5 . . ?
H12B C12 H12C 109.5 . . ?
C13 C14 H14A 109.5 . . ?
C13 C14 H14B 109.5 . . ?
H14A C14 H14B 109.5 . . ?
C13 C14 H14C 109.5 . . ?
H14A C14 H14C 109.5 . . ?
H14B C14 H14C 109.5 . . ?
C15 C16 H16A 109.5 . . ?
C15 C16 H16B 109.5 . . ?
H16A C16 H16B 109.5 . . ?
C15 C16 H16C 109.5 . . ?
H16A C16 H16C 109.5 . . ?
H16B C16 H16C 109.5 . . ?
 
_refine_diff_density_max    0.457
_refine_diff_density_min   -0.197
_refine_diff_density_rms    0.047

_shelx_res_file
;

    heit.res created by SHELXL-2014/7

TITL heit in P2(1)/n
CELL 0.71073  12.9067   5.2265  19.5672  90.000  99.198  90.000
ZERR   2.00   0.0136   0.0056   0.0202   0.000   0.018   0.000
LATT 1
SYMM 0.5-X, 0.5+Y, 0.5-Z
SFAC C  H  N
UNIT 64 76 8
L.S. 20
ACTA
BOND $H
FMAP 2
PLAN 5
SHEL 0.84 999
TEMP   25.0
WGHT    0.125800    0.072200
FVAR       0.82225
MOLE 1
N2    3    0.524190    1.009809    0.098134    11.00000    0.05636    0.05957 =
         0.05469   -0.00352    0.00667    0.00457
N1    3    0.402601    0.705489    0.005880    11.00000    0.06339    0.06158 =
         0.05143   -0.00238    0.00850    0.00026
C5    1    0.496891    0.797745    0.198587    11.00000    0.06641    0.06157 =
         0.05066   -0.00139    0.00638    0.00978
C2    1    0.655892    1.317368    0.155235    11.00000    0.06990    0.07829 =
         0.05455   -0.01336    0.00417   -0.00660
AFIX  43
H2    2    0.686814    1.363146    0.199776    11.00000   -1.20000
AFIX   0
C3    1    0.586294    1.111887    0.154045    11.00000    0.06235    0.06222 =
         0.05353   -0.00689    0.00496    0.00242
C6    1    0.467634    0.819862    0.123143    11.00000    0.05799    0.05668 =
         0.05034   -0.00153    0.00457    0.01138
C7    1    0.398572    0.672643    0.074962    11.00000    0.06073    0.05764 =
         0.05074   -0.00087    0.00560    0.00770
C8    1    0.320455    0.481581    0.080058    11.00000    0.07666    0.06174 =
         0.05516   -0.00144    0.00854   -0.00492
C1    1    0.688528    1.466407    0.104848    11.00000    0.07290    0.08158 =
         0.05369   -0.01100    0.00589   -0.01628
AFIX  43
H1    2    0.734034    1.597817    0.121851    11.00000   -1.20000
AFIX   0
C10   1    0.334404    0.544120   -0.032663    11.00000    0.07288    0.07065 =
         0.05812   -0.01233    0.00720   -0.00647
C4    1    0.569772    0.981027    0.215309    11.00000    0.07368    0.07141 =
         0.04615   -0.00583    0.00189    0.00672
AFIX  43
H4    2    0.603963    1.016683    0.259812    11.00000   -1.20000
AFIX   0
C13   1    0.271562    0.403954    0.141580    11.00000    0.09763    0.07061 =
         0.06039    0.00418    0.01189   -0.01836
AFIX  23
H13A  2    0.326558    0.356201    0.179198    11.00000   -1.20000
H13B  2    0.227543    0.255057    0.129574    11.00000   -1.20000
AFIX   0
C11   1    0.465280    0.607862    0.248997    11.00000    0.08245    0.07328 =
         0.05554    0.00518    0.00356    0.00179
AFIX  23
H11A  2    0.470160    0.437089    0.230363    11.00000   -1.20000
H11B  2    0.392436    0.637643    0.253340    11.00000   -1.20000
AFIX   0
C9    1    0.284681    0.397886    0.014095    11.00000    0.08383    0.07825 =
         0.06301   -0.00497    0.00862   -0.02480
C15   1    0.206682    0.182049   -0.006856    11.00000    0.09205    0.13423 =
         0.07223    0.00796    0.00983   -0.00454
AFIX  23
H15A  2    0.219506    0.104078   -0.049707    11.00000   -1.20000
H15B  2    0.213523    0.051507    0.028820    11.00000   -1.20000
AFIX   0
C12   1    0.530435    0.618574    0.319827    11.00000    0.13358    0.13401 =
         0.05918    0.02642   -0.00781   -0.03034
AFIX 137
H12A  2    0.602712    0.588033    0.316235    11.00000   -1.50000
H12B  2    0.506627    0.490115    0.348772    11.00000   -1.50000
H12C  2    0.523587    0.784414    0.339719    11.00000   -1.50000
AFIX   0
C14   1    0.205546    0.617370    0.166041    11.00000    0.09916    0.09093 =
         0.07467    0.00869    0.02030   -0.01058
AFIX 137
H14A  2    0.248629    0.765702    0.177680    11.00000   -1.50000
H14B  2    0.177573    0.561004    0.206088    11.00000   -1.50000
H14C  2    0.148913    0.659637    0.129742    11.00000   -1.50000
AFIX   0
C16   1    0.103712    0.292550   -0.015776    11.00000    0.14084    0.11256 =
         0.10441   -0.01354    0.01703   -0.01766
AFIX 137
H16A  2    0.091482    0.365972    0.027195    11.00000   -1.50000
H16B  2    0.052336    0.162215   -0.029914    11.00000   -1.50000
H16C  2    0.098379    0.423443   -0.050582    11.00000   -1.50000
AFIX   0
H1X   2    0.444821    0.814310   -0.018219    11.00000    0.08047
HKLF 4

REM  heit in P2(1)/n
REM R1 =  0.0723 for    1340 Fo > 4sig(Fo)  and  0.1177 for all    2273 data
REM    170 parameters refined using      0 restraints

END

WGHT      0.1255      0.0772

REM Highest difference peak  0.457,  deepest hole -0.197,  1-sigma level  0.047
Q1    1   0.1761 -0.0083 -0.0201  11.00000  0.05    0.46
Q2    1   0.2271  0.5033  0.0129  11.00000  0.05    0.18
Q3    1   0.5440  0.7499  0.3415  11.00000  0.05    0.17
Q4    1   0.5000  1.0000  0.0000  10.50000  0.05    0.16
Q5    1   0.4984  0.5506  0.3564  11.00000  0.05    0.15
;
_shelx_res_checksum   88753

_shelx_hkl_file
;
  -1   0   0   -0.46    0.35
  -1   0   0   -0.50    0.40
   1   0   0   -0.66    1.84
  -2   0   0  244.29   10.04
   2   0   0  233.82   16.68
  -2   0   0  235.49    9.74
  -3   0   0   -0.83    1.00
  -3   0   0    0.34    0.84
   3   0   0   -0.40    5.33
  -3   0   0    1.33    2.05
  -4   0   0  523.47   21.25
   4   0   0  516.41   35.60
  -4   0   0  505.57   22.69
  -4   0   0  500.35   20.67
  -5   0   0    0.37    1.15
  -5   0   0    0.07    1.00
  -5   0   0    0.12    2.03
   5   0   0   -6.00    8.23
  -6   0   0   45.84    5.38
  -6   0   0   46.47    3.96
  -6   0   0   47.52    4.44
  -7   0   0    1.91    1.34
   7   0   0    4.02   11.01
  -7   0   0    0.08    2.57
  -8   0   0   98.83    7.20
   8   0   0  106.37    8.34
  -8   0   0   78.21    7.63
   9   0   0   -0.45    1.95
   9   0   0    1.31   13.07
  -9   0   0    1.51    3.94
  10   0   0  214.69   14.08
 -10   0   0  188.10   13.68
  11   0   0  -12.17   11.24
  11   0   0    4.09    2.51
 -11   0   0    5.37    4.87
 -12   0   0   20.04    6.04
  12   0   0   -6.88   15.15
 -13   0   0    1.63    3.88
  13   0   0    0.25   17.18
 -14   0   0   20.01    6.29
  14   0   0   -5.27   17.47
  15   0   0   16.21   20.43
   0   1   0    0.39    0.83
   0  -1   0    0.45    1.05
   0  -1   0   -0.15    0.71
  -1  -1   0   16.20    2.03
  -1  -1   0   17.83    2.19
   1  -1   0   15.00    2.45
  -1   1   0   15.00    1.56
   1   1   0   16.94    2.49
  -1   1   0   17.56    2.74
   2  -1   0 4144.11  185.98
  -2   1   0 4906.40  171.51
  -2  -1   0 5052.58  185.49
  -2   1   0 4836.33  174.31
  -2  -1   0 4647.44  169.71
   2   1   0 4881.07  175.82
  -3   1   0 3873.84  138.16
  -3   1   0 3844.04  139.29
   3   1   0 3818.88  141.86
  -3  -1   0 3555.95  136.15
  -3  -1   0 3867.61  148.40
  -4  -1   0  928.12   36.23
  -4   1   0  915.78   35.66
  -4   1   0  994.01   38.13
   4   1   0  939.43   39.01
  -4  -1   0  950.82   38.31
  -5   1   0  834.11   34.85
   5   1   0  832.21   35.76
  -5  -1   0  810.59   32.84
  -5  -1   0  841.43   34.24
   5  -1   0  850.98   35.26
  -5   1   0  849.63   32.21
  -6   1   0   96.75    7.80
   6   1   0   81.97    7.07
  -6  -1   0   72.30    4.77
  -6  -1   0   71.04    5.65
  -6   1   0   81.16    4.74
   6  -1   0   81.17    5.27
  -7  -1   0    0.74    1.42
  -7  -1   0    1.38    2.22
   7  -1   0    2.37    1.18
   7  -1   0   -7.58    9.60
  -7   1   0    1.96    1.16
  -7   1   0   -0.12    2.94
   7   1   0   -2.78    8.22
   7   1   0    1.19    1.89
   8   1   0   -2.80    9.12
   8  -1   0    4.18   10.81
  -8   1   0   11.44    4.56
  -8   1   0    5.52    1.88
   8  -1   0    3.99    1.35
   8   1   0    3.20    2.34
  -8  -1   0    3.49    2.90
  -9   1   0    2.88    4.65
   9   1   0    3.33   10.11
  -9  -1   0   10.04    3.87
   9  -1   0    1.34   14.53
   9   1   0    6.12    2.92
  -9   1   0    9.95    2.49
   9  -1   0    7.64    1.77
 -10  -1   0    1.20    2.76
  10   1   0    2.91    3.14
  10   1   0   -1.29    7.12
 -10   1   0    6.28    5.64
  10  -1   0   -3.68   15.95
  11  -1   0   -3.46   11.87
  11   1   0   -1.28    7.73
 -11   1   0    4.68    4.81
 -11  -1   0    2.58    3.15
  11   1   0    2.36    2.98
 -12  -1   0   43.87    7.09
  12  -1   0   14.13   16.43
 -12   1   0   39.82    8.43
  12   1   0   54.00    8.98
  13   1   0   -5.05    7.89
  13   1   0    5.37    4.73
  13  -1   0  -16.52   16.74
 -13   1   0    0.31    4.45
 -13  -1   0    5.31    3.55
 -14   1   0   18.56    6.34
 -14  -1   0   20.65    5.35
  14   1   0   -1.09    9.55
  14  -1   0   -3.17   19.25
 -15  -1   0    4.55    3.04
 -15   1   0    5.35    5.00
   0   2   0  189.98   10.07
   0  -2   0  178.02   10.54
   0  -2   0  180.43    9.94
   1  -2   0  107.97    7.75
  -1   2   0  104.74    6.21
   1   2   0   96.46    7.08
  -1  -2   0   97.54    6.74
  -1  -2   0   97.19    6.94
  -1   2   0  103.41    8.04
  -2   2   0  247.12   13.94
  -2  -2   0  217.14   11.62
  -2   2   0  218.85   10.50
   2   2   0  212.20   12.59
  -2  -2   0  210.23   11.83
   2  -2   0  260.12   13.89
  -3  -2   0    1.05    1.51
  -3   2   0    2.18    1.04
  -3   2   0    3.02    1.94
   3  -2   0    3.84    2.44
   3   2   0    1.66    1.57
  -3  -2   0    2.18    1.51
   3  -2   0   -4.57    7.66
  -4   2   0  136.07    6.56
  -4  -2   0  122.73    8.05
  -4  -2   0  132.54    8.13
   4  -2   0  181.01   11.16
  -4   2   0  128.32    9.76
   4   2   0  138.40    9.99
  -5  -2   0  288.71   14.01
   5  -2   0  239.41   15.96
  -5  -2   0  292.27   14.46
   5   2   0  291.73   16.60
  -5   2   0  291.25   11.98
  -5   2   0  290.07   16.18
   6  -2   0   99.87    8.54
   6   2   0   80.73    8.18
  -6   2   0   86.89    4.93
  -6  -2   0   86.49    5.94
  -6   2   0   95.72    8.37
  -6  -2   0   88.94    6.88
   7  -2   0    0.15   13.69
  -7  -2   0    4.26    1.68
   7   2   0    1.97    2.20
   7   2   0    0.13    6.43
  -7   2   0    7.37    3.45
   7  -2   0    7.44    2.74
  -7  -2   0    6.42    2.57
   8   2   0  136.42   11.44
  -8   2   0  123.98   10.68
   8  -2   0  138.34    9.54
  -8  -2   0  128.65    9.19
  -9  -2   0    9.72    3.21
   9  -2   0    6.09    2.20
   9  -2   0   12.93   19.14
  -9   2   0    9.88    4.88
   9   2   0    5.71    3.77
   9   2   0   -2.24    7.78
  10   2   0   -0.57    9.28
  10   2   0   28.71    6.58
  10  -2   0    4.47   20.36
 -10  -2   0   22.60    4.74
 -10   2   0   20.15    6.56
 -11   2   0    4.26    5.07
  11  -2   0  -12.29   20.71
  11   2   0    3.51    6.53
 -11  -2   0   -0.32    1.82
  11   2   0    0.93    3.06
 -12  -2   0    1.90    2.30
 -12   2   0   -2.20    4.73
  12   2   0   -0.55    3.37
  12  -2   0   -9.55   24.53
  12   2   0    2.64    8.26
  13   2   0   -2.69    3.00
 -13  -2   0    2.19    2.77
 -13   2   0   -1.84    4.46
  13  -2   0   13.65   27.77
 -14  -2   0    4.51    2.73
 -14   2   0   -5.34    3.79
  14  -2   0   -1.31   30.60
  14   2   0    1.91    4.33
   0  -3   0    0.55    1.44
   0  -3   0    1.22    1.80
   0   3   0    0.08    1.24
  -1   3   0   78.19    7.87
  -1  -3   0   67.85    6.38
   1   3   0   67.01    6.54
  -1  -3   0   66.31    6.10
  -1   3   0   65.99    5.65
   1  -3   0   60.10    6.82
  -2   3   0   61.76    5.13
   2   3   0   57.19    6.94
   2  -3   0   62.92    7.00
  -2  -3   0   57.48    5.76
  -2  -3   0   58.06    5.90
  -2   3   0   56.15    8.15
  -3   3   0   11.27    2.44
   3  -3   0   11.58    3.84
  -3   3   0   13.93    4.39
   3   3   0   14.10    4.06
  -3  -3   0   19.76    4.24
  -3  -3   0   12.99    3.33
   4  -3   0   66.93   19.65
   4  -3   0   18.26    5.04
  -4   3   0   20.81    5.73
   4   3   0   16.16    4.56
  -4  -3   0   18.28    4.45
  -4  -3   0   23.05    3.91
  -5  -3   0   97.45    8.06
  -5   3   0   93.87    9.84
   5   3   0   82.20    8.71
   5  -3   0   71.52    9.41
  -5  -3   0   85.70    6.96
   6  -3   0   25.15    6.61
   6   3   0   15.41    4.54
  -6  -3   0   16.29    4.00
  -6   3   0    8.96    3.96
  -6  -3   0   16.86    3.50
   6  -3   0   31.00   17.51
  -7  -3   0   15.46    4.14
  -7   3   0   29.79    6.56
   7   3   0   29.96    6.72
   7  -3   0   32.44    7.07
   7  -3   0   69.82   28.19
   8  -3   0   53.24    8.76
  -8   3   0   31.74    6.93
  -8  -3   0   31.76    5.89
   8   3   0   41.39    8.08
   9  -3   0   41.09    7.28
   9   3   0   29.31    7.20
  -9  -3   0   33.29    6.44
  -9   3   0   24.62    6.55
   9  -3   0   35.02   29.63
 -10   3   0    5.58    4.46
 -10  -3   0    8.78    3.37
  10   3   0    3.96    4.13
  10  -3   0   18.09   26.63
  10  -3   0   11.75    4.29
  11  -3   0    8.45   28.49
 -11  -3   0    9.38    3.55
 -11   3   0    1.60    4.24
  11   3   0   13.10    5.79
 -12  -3   0    0.59    2.27
 -12   3   0    1.95    4.69
  12  -3   0   22.31   31.74
  12   3   0    8.91    4.47
 -13   3   0   -6.20    4.12
  13  -3   0   38.80   37.20
  13   3   0    1.40    4.33
   0   4   0   -0.77    1.92
   0  -4   0   -1.97    1.89
   0   4   0    1.24    1.75
  -1  -4   0   34.77    6.15
  -1   4   0   30.15    4.76
  -1  -4   0   45.84    7.02
   1   4   0   31.09    5.54
  -1   4   0   28.48    6.65
   1  -4   0   34.06    6.61
  -2   4   0   16.31    5.79
   2   4   0   13.62    4.35
  -2  -4   0   13.64    3.77
  -2  -4   0   20.71    4.81
   2  -4   0   11.95    4.52
  -2   4   0   13.60    3.08
  -3  -4   0    1.73    1.98
   3  -4   0    1.13    2.76
  -3   4   0   -0.99    2.87
   3   4   0   -0.69    2.10
  -3  -4   0    0.92    2.12
  -4  -4   0   10.37    3.44
   4  -4   0   12.70    4.75
   4   4   0   14.57    4.68
  -4  -4   0    4.05    2.63
  -4   4   0    1.50    3.66
  -5   4   0    0.27    2.81
   5  -4   0    1.57    3.45
  -5  -4   0   -0.98    1.99
   5   4   0    2.06    2.49
  -5  -4   0    0.64    1.54
  -6   4   0   26.44    7.36
  -6  -4   0   20.67    5.36
  -6  -4   0   24.34    4.65
   6  -4   0   31.16    7.87
   6   4   0   32.57    7.34
  -7  -4   0   62.64    9.18
  -7   4   0   57.21   10.25
   7  -4   0   54.22   30.94
   7  -4   0   44.02    9.37
   7   4   0   49.56    9.17
   8  -4   0   -3.07    3.77
  -8  -4   0    0.04    2.08
   8  -4   0   52.58   32.64
  -8   4   0    0.74    2.89
   8   4   0   -0.27    2.84
  -9  -4   0    4.86    3.07
   9  -4   0   12.68   29.03
   9   4   0    4.49    3.82
  -9   4   0    4.57    3.92
   9  -4   0    6.69    5.40
 -10  -4   0    0.80    2.31
  10  -4   0  -15.93   30.63
 -10   4   0    1.77    3.65
  10   4   0    2.69    4.08
  10  -4   0   -0.11    3.69
  11  -4   0   23.44   36.58
   0  -5   0    0.98    2.24
   0   5   0    0.06    1.79
   0   5   0    0.64    2.72
   1  -5   0   11.17    4.53
   1   5   0   10.81    4.00
   1   5   0   11.29    4.23
  -1  -5   0   19.24    5.79
  -1   5   0   13.35    5.30
  -2   5   0   -0.58    3.25
   2  -5   0    1.68    3.39
   2   5   0    1.60    2.03
  -2  -5   0    3.37    3.03
  -2  -5   0   -2.93    1.63
  -3  -5   0  112.59   10.51
  -3  -5   0  114.84   10.80
  -3   5   0   86.52   13.26
   3   5   0   93.18   10.15
   3  -5   0  104.75   11.57
  -4   5   0    7.37    5.38
   4   5   0   17.50    5.48
  -4  -5   0    7.58    3.88
   4  -5   0   13.59    5.23
  -4  -5   0   17.37    4.88
   5  -5   0   30.24    7.24
  -5   5   0   37.48   10.11
  -5  -5   0   32.79    7.13
  -5  -5   0   31.61    6.27
   5   5   0   33.54    7.32
   6  -5   0   -4.85    3.28
   6   5   0   -0.80    2.90
  -6  -5   0    1.52    3.09
  -6   5   0   -4.05    3.09
  -7  -5   0    3.44    2.76
   7  -5   0    6.18    4.31
  -7   5   0   -4.67    3.21
   7   5   0   -3.55    2.84
   8   5   0   -5.64    2.60
   8  -5   0    1.68    4.71
  -8   5   0    5.43    4.08
  -8  -5   0    5.76    3.31
   9   5   0   -2.18    2.79
  -9   5   0   -0.40    4.11
  -9  -5   0   -0.54    2.63
   9  -5   0    6.42    4.50
   0   6   0   15.26    5.89
   0  -6   0   22.82    5.96
  -1  -6   0   10.72    4.67
  -1   6   0    8.33    4.92
   1   6   0    6.26    3.61
   1  -6   0    6.46    4.28
   2   6   0    7.51    3.92
  -2  -6   0    9.94    4.07
  -2   6   0   -2.41    3.29
   2  -6   0    7.01    3.77
   3   6   0   -0.25    2.79
  -3   6   0   -1.60    3.20
  -3  -6   0    6.01    3.01
   3  -6   0    4.34    4.06
   4  -6   0   -6.06    2.69
  -4   6   0    4.07    4.47
  -4  -6   0    0.09    2.76
  -4  -6   0   -1.86    2.36
 -15   0   1   15.91    4.97
  15   0  -1   26.52   21.81
  14   0  -1    7.99   19.40
 -14   0   1    5.92    4.61
  13   0  -1   -1.99   16.81
 -13   0   1    3.58    4.44
 -12   0   1   -2.25    3.33
  12   0  -1    1.61   14.11
  11   0  -1    8.12   13.60
  11   0  -1    1.04    2.66
 -11   0   1    7.66    4.98
 -10   0   1   -4.07    3.49
  10   0  -1   -0.94    2.21
  10   0  -1    0.32   10.76
  -9   0   1   38.64    4.83
   9   0  -1    8.00   14.73
  -9   0   1   32.87    5.99
   8   0  -1   -3.06   11.38
  -8   0   1    0.59    3.22
  -8   0   1    0.79    1.64
  -8   0   1    0.29    1.19
   7   0  -1    2.78   10.35
  -7   0   1    2.78    1.63
  -7   0   1    4.07    3.29
  -7   0   1    2.69    1.49
  -6   0   1    0.72    2.37
  -6   0   1   -0.95    1.00
   6   0  -1    3.91    8.60
  -6   0   1    2.07    1.20
  -5   0   1    6.06    1.56
   5   0  -1    1.69    8.09
  -5   0   1    6.18    1.75
  -5   0   1    6.38    2.60
  -4   0   1   -0.20    0.97
   4   0  -1    1.41    6.53
  -4   0   1    1.98    2.18
  -3   0   1  375.13   15.40
   3   0  -1  361.14   15.23
  -3   0   1  371.35   15.66
   3   0  -1  413.12   27.33
  -2   0   1   -2.94    0.76
  -2   0   1   -0.73    1.13
   2   0  -1   -5.03    4.39
  -1   0   1 3564.65  131.87
  -1   0   1 3600.18  128.59
   0   0  -1    0.37    0.36
   1   0   1 6144.32  211.97
  -1   0  -1 5294.24  224.29
  -2   0  -1    0.41    1.23
   2   0   1   -0.32    0.72
  -2   0  -1    0.09    0.95
   2   0   1    0.14    5.72
   3   0   1 3442.23  194.04
  -3   0  -1 3072.64  125.78
   3   0   1 3207.61  117.47
  -3   0  -1 2945.82  114.21
  -4   0  -1   -2.16    1.58
  -4   0  -1    0.59    1.24
   4   0   1   -0.43    1.01
   4   0   1   -2.94    8.01
  -5   0  -1  289.60   14.99
  -5   0  -1  290.37   13.80
   5   0   1  254.30   22.36
   5   0   1  297.87   13.79
  -6   0  -1    1.49    1.37
   6   0   1   -3.62    8.88
   6   0   1   -0.40    0.98
  -6   0  -1   -3.22    1.81
   7   0   1   -8.05   10.30
   7   0   1   -1.28    1.22
  -7   0  -1    0.05    2.86
  -7   0  -1    1.51    1.60
  -8   0  -1   -1.73    1.39
   8   0   1    1.47    1.70
  -8   0  -1   -1.74    3.29
   8   0   1   -3.14   11.97
   9   0   1   15.16    3.59
   9   0   1   -4.39   12.03
  -9   0  -1    6.09    4.27
  10   0   1    8.62   11.96
 -10   0  -1   -1.99    4.30
  10   0   1    3.99    2.31
 -12   0  -1   -1.56    3.37
  12   0   1    8.71   14.90
 -13   0  -1    0.27    4.17
  13   0   1   18.37   18.54
  14   0   1   11.56   16.91
 -14   0  -1    8.67    4.77
  15   0   1   -6.35   16.88
 -15  -1   1    6.12    3.37
  15   1  -1    3.05   13.21
 -15   1   1   -1.68    3.93
  15  -1  -1   -2.20   21.05
 -14   1   1    6.03    5.23
  14  -1  -1   15.85   19.53
  14   1  -1    0.95   12.98
 -14  -1   1   13.20    4.63
  13   1  -1   10.08    5.14
  13   1  -1   -7.01    8.30
 -13   1   1    0.98    4.95
 -13  -1   1    5.12    3.73
  13  -1  -1    7.92   17.24
  12   1  -1   10.22    5.11
  12  -1  -1   -6.19   13.30
 -12   1   1    9.89    5.48
 -12  -1   1    5.58    3.80
  12   1  -1   -1.18    8.38
  11   1  -1    0.36    2.61
 -11   1   1    6.14    5.41
  11  -1  -1   -5.40   15.25
 -11  -1   1    2.99    3.19
  11   1  -1   -2.01    8.52
  10   1  -1   10.21    4.41
 -10   1   1    9.36    5.51
  10  -1  -1    0.90   15.20
 -10  -1   1    6.90    3.77
  10   1  -1    2.32    8.37
   9   1  -1   28.26    5.79
  -9   1   1   29.42    3.77
  -9  -1   1   30.09    5.00
   9   1  -1    0.77   11.26
  -9   1   1   21.30    6.44
   8   1  -1    6.55    3.17
  -8  -1   1    9.46    3.12
   8   1  -1  -12.50   10.21
   8  -1  -1   -3.32    9.99
   8  -1  -1    6.21    1.58
  -8   1   1    3.98    3.76
  -8   1   1    8.97    2.30
  -7  -1   1   72.30    5.99
   7   1  -1   82.19    7.73
  -7  -1   1   80.54    4.46
   7  -1  -1   76.63    5.14
  -7   1   1   75.73    7.75
  -7   1   1   79.56    5.28
  -6   1   1    0.64    1.01
   6   1  -1   -2.65    6.92
   6  -1  -1    1.36    9.94
  -6   1   1   -0.03    2.48
  -6  -1   1    0.13    0.71
  -6  -1   1    2.23    1.85
   6  -1  -1   -0.15    0.85
   6   1  -1   -0.40    1.55
  -5  -1   1    1.49    1.51
   5   1  -1   -2.88    1.13
   5  -1  -1  -12.19    8.37
   5  -1  -1    1.67    1.29
  -5   1   1    2.09    2.00
  -5   1   1    1.88    1.04
   5   1  -1   -2.91    6.57
  -5  -1   1    1.22    0.86
   4  -1  -1 2700.27  119.81
  -4  -1   1 3097.40  118.31
  -4   1   1 3039.19  111.38
  -4  -1   1 3030.73  109.52
  -4   1   1 3230.22  111.52
  -3   1   1 9754.73  346.60
   3  -1  -1 9739.85  378.39
  -3  -1   1 9998.11  377.18
  -3   1   1 9519.47  354.25
  -3  -1   1 9476.80  344.94
  -2   1   1 6853.23  260.74
  -2  -1   1 6847.24  253.92
  -2   1   1 6914.98  255.29
   2  -1  -1 8166.55  278.96
   2   1  -1 6872.23  262.43
  -2  -1   1 7101.22  277.49
  -1  -1   1  965.87   42.31
  -1   1   1 1012.33   40.07
  -1  -1   1 1126.94   39.44
   1  -1  -1 1146.13   43.23
  -1   1   1  999.80   39.65
   1   1  -1 1030.75   40.73
   0  -1   1 1737.93   67.20
   0   1  -1 1873.05   69.18
   0   1   1 1807.96   69.18
   0  -1   1 1954.79   73.92
   0  -1  -1 1840.01   67.28
   0  -1  -1 1868.38   73.62
  -1  -1  -1  712.14   27.61
  -1  -1  -1  726.53   30.14
   1  -1   1  810.95   30.84
  -1   1  -1  698.16   28.93
  -1   1  -1  697.98   27.65
   1   1   1  714.16   29.14
   2   1   1 2491.37   91.14
  -2  -1  -1 2298.49   87.07
  -2   1  -1 2376.67   88.91
   2  -1   1 2486.24   96.05
  -2  -1  -1 2394.38   95.18
  -3  -1  -1  119.16    6.55
  -3  -1  -1  117.43    6.35
  -3   1  -1  119.63    7.48
   3  -1   1  122.11    7.04
   3   1   1  109.63    7.41
  -4  -1  -1  106.82    6.25
   4  -1   1  104.01    6.34
   4   1   1  112.80    7.57
  -4  -1  -1  103.16    6.21
  -4   1  -1  113.57    7.52
   5  -1   1   33.17    3.09
  -5  -1  -1   31.29    3.24
  -5  -1  -1   29.19    3.67
  -5   1  -1   30.00    2.27
   5   1   1   27.91    4.29
  -5   1  -1   27.78    4.42
  -6   1  -1   52.88    3.55
  -6  -1  -1   50.41    4.38
  -6   1  -1   51.03    6.32
   6   1   1   55.17    5.56
   6  -1   1   50.61    4.04
  -6  -1  -1   54.98    4.82
  -7   1  -1   64.49    7.05
   7  -1   1   57.36    4.40
  -7  -1  -1   59.72    5.47
   7   1   1   66.11    6.50
  -7  -1  -1   69.16    5.12
   8  -1   1  115.06    6.80
  -8   1  -1  113.58   10.21
   8   1   1  100.03    8.86
  -8  -1  -1  115.08    8.32
   8  -1   1  123.03    7.82
   9   1   1    4.50    9.80
   9   1   1    6.01    2.91
  -9  -1  -1    6.52    3.53
  -9   1  -1    3.19    4.61
   9  -1   1    1.94   14.22
  10   1   1    3.10    2.43
 -10   1  -1    5.98    5.14
 -10  -1  -1    6.05    3.71
  10  -1   1   -1.45   13.89
  10   1   1   -1.86    7.52
  11   1   1    6.68    9.58
 -11  -1  -1   -0.59    2.46
  11   1   1    5.18    2.97
  11  -1   1   -2.31   13.90
 -11   1  -1    3.47    5.19
  12   1   1    7.46    4.06
  12  -1   1   26.16   20.07
 -12   1  -1    6.38    5.80
  12   1   1   -3.04    8.22
 -12  -1  -1   10.36    3.90
  13   1   1    8.16   11.56
 -13   1  -1   28.74    7.50
  13  -1   1    8.79   19.99
  13   1   1   51.65    8.78
 -13  -1  -1   42.29    7.16
 -14  -1  -1    4.85    3.58
  14   1   1   -0.68    9.52
 -14   1  -1   -2.42    3.91
  14  -1   1  -12.46   20.69
  14  -2  -1    2.13   28.19
 -14  -2   1   -1.42    1.63
 -14   2   1   -1.34    4.52
  14   2  -1   10.84    5.08
 -13  -2   1    0.56    2.35
  13   2  -1   -4.39    7.93
  13   2  -1   -1.60    3.36
  13  -2  -1   -5.86   26.30
 -13   2   1   -6.07    4.69
  12   2  -1   -3.42    7.79
  12  -2  -1   21.30   24.52
  12   2  -1   -3.39    2.95
 -12  -2   1    3.35    2.69
 -12   2   1    5.47    5.69
 -11   2   1    7.34    5.20
  11   2  -1   10.79    5.05
  11  -2  -1    1.72   22.20
 -11  -2   1    3.90    2.34
  11   2  -1   -0.27    7.35
  10   2  -1    3.78    3.32
  10   2  -1    1.16    9.26
 -10   2   1    5.97    4.99
  10  -2  -1   10.17   18.75
 -10  -2   1    2.59    2.40
   9  -2  -1   -3.30   15.45
   9   2  -1   26.03    6.29
  -9  -2   1   21.55    4.51
   9  -2  -1   29.99    4.44
   9   2  -1   -0.35    9.31
  -9   2   1   20.67    6.22
   8  -2  -1   -7.35   15.28
   8   2  -1    0.82    2.38
  -8   2   1    0.19    2.73
  -8  -2   1    2.74    2.20
   8   2  -1   -1.91   11.00
   7   2  -1    4.53    2.83
  -7  -2   1    3.59    2.24
   7   2  -1    0.13    7.31
   7  -2  -1   11.85    3.65
  -7   2   1    5.21    1.59
  -7  -2   1    8.01    1.94
   7  -2  -1    3.37   11.44
  -7   2   1    7.07    3.06
  -6  -2   1  974.21   39.70
   6   2  -1  959.76   43.31
   6  -2  -1 1143.37   45.91
  -6   2   1  941.91   41.80
  -6   2   1  940.65   37.79
  -6  -2   1  939.60   40.66
  -5   2   1 1239.17   45.25
   5   2  -1 1149.00   49.83
  -5  -2   1 1156.87   48.45
  -5  -2   1 1222.25   46.67
  -5   2   1 1102.53   48.24
   4  -2  -1   20.23    4.64
  -4   2   1   34.39    5.40
  -4   2   1   29.60    2.63
   4   2  -1   29.06    4.91
   4  -2  -1   20.38   10.95
  -4  -2   1   25.96    3.78
  -4  -2   1   28.31    3.10
   3   2  -1    6.69    2.80
   3  -2  -1   12.01    3.59
  -3   2   1    4.41    1.41
  -3   2   1    6.22    2.56
   3  -2  -1   -3.83    6.60
  -3  -2   1    5.90    2.06
  -3  -2   1    4.47    1.64
  -2   2   1  494.06   24.03
  -2  -2   1  529.47   22.38
  -2   2   1  508.93   21.39
   2  -2  -1  523.71   24.75
   2   2  -1  515.06   23.53
  -2  -2   1  487.97   22.89
   1  -2  -1  178.29   10.35
  -1  -2   1  156.74    9.13
  -1  -2   1  156.56    9.46
   1   2  -1  147.36    9.28
  -1   2   1  151.49    8.47
  -1   2   1  147.62   10.10
   0  -2   1   45.26    4.70
   0  -2   1   42.22    4.27
   0  -2  -1   47.58    4.76
   0  -2  -1   40.78    4.02
   0   2   1   42.45    4.17
   0   2  -1   46.75    4.12
  -1  -2  -1    6.94    2.36
   1   2   1    3.98    2.04
  -1   2  -1    3.85    1.36
  -1   2  -1    2.32    1.96
   1  -2   1    3.78    2.14
  -1  -2  -1    5.80    2.10
   1  -2   1   -4.97    5.57
  -2  -2  -1   42.45    4.20
   2  -2   1   28.67    4.34
   2   2   1   45.03    5.30
  -2   2  -1   37.86    2.97
  -2  -2  -1   43.98    4.21
  -2   2  -1   41.80    5.72
  -3  -2  -1  989.86   41.84
   3  -2   1 1009.84   43.89
   3   2   1  971.21   41.91
  -3  -2  -1 1015.23   39.35
  -3   2  -1  964.87   41.84
   4   2   1  292.17   16.14
  -4  -2  -1  301.02   14.04
   4  -2   1  234.38   15.45
  -4  -2  -1  293.39   14.31
  -4   2  -1  286.09   16.06
   5  -2   1   85.49    7.35
  -5  -2  -1   75.34    6.02
  -5  -2  -1   79.76    5.92
  -5   2  -1   72.61    7.11
   5   2   1   68.25    7.09
   6  -2   1   87.35    7.52
  -6   2  -1   76.25    7.60
   6   2   1   76.21    7.77
  -6  -2  -1   86.90    6.74
  -7  -2  -1    6.01    2.22
   7  -2   1    6.74    2.39
  -7   2  -1    6.88    3.02
  -7  -2  -1   11.02    3.34
   7   2   1   -3.71    5.91
   7  -2   1   21.66   16.02
   7   2   1   10.68    3.75
  -8   2  -1   15.34    4.73
   8  -2   1  -12.85   17.97
   8  -2   1   18.92    3.97
  -8  -2  -1   19.13    4.27
   8   2   1   20.83    5.18
  -9   2  -1   13.01    5.28
   9   2   1   -5.81    8.23
   9   2   1   18.11    5.17
   9  -2   1   16.88    3.54
  -9  -2  -1   16.25    4.02
   9  -2   1   12.27   19.84
 -10  -2  -1   54.13    6.82
  10  -2   1   55.92    5.36
 -10   2  -1   43.36    8.32
  10   2   1   64.40    9.26
  11  -2   1    6.06   23.33
  11   2   1    1.36    7.50
  11   2   1    3.92    3.01
 -11  -2  -1    3.94    2.77
 -11   2  -1   -0.50    4.03
  12   2   1    5.84    8.68
 -12   2  -1    5.06    5.63
  12  -2   1   27.84   28.09
  12   2   1    9.80    4.72
 -12  -2  -1   10.25    3.78
 -13  -2  -1    4.82    2.79
  13  -2   1    9.92   30.37
 -13   2  -1    4.89    5.30
  13   2   1    2.25    3.70
 -14   2  -1    4.48    5.08
  14   2   1    8.42    4.96
  14  -2   1   29.13   36.26
 -14  -2  -1    7.77    3.38
 -13   3   1   -2.58    4.51
 -13  -3   1    1.28    2.37
  13   3  -1    5.88    4.49
  13  -3  -1  -16.96   29.97
  12  -3  -1   14.10   28.20
 -12  -3   1   -0.83    1.98
  12   3  -1    0.20    3.76
 -12   3   1   -3.98    4.22
 -11   3   1    3.02    4.21
  11  -3  -1    2.13   24.61
 -11  -3   1    8.12    3.45
  11   3  -1    6.65    4.94
 -10   3   1   13.07    5.84
  10  -3  -1   19.93   24.59
  10   3  -1   30.37    7.78
  10  -3  -1   36.58    6.57
 -10  -3   1   19.16    4.97
  -8  -3   1  113.60    9.34
  -8   3   1  106.52   10.72
   8   3  -1  113.18   11.38
   7  -3  -1   67.20    9.91
  -7   3   1   41.01    7.55
   7  -3  -1   58.42   23.12
   7   3  -1   58.06    8.55
  -7  -3   1   46.19    6.68
  -6  -3   1    6.33    2.21
   6   3  -1    2.71    2.45
  -6   3   1    4.94    2.97
   6  -3  -1   26.21   15.19
   6  -3  -1    6.99    3.80
  -6  -3   1    5.14    2.60
  -5  -3   1   99.36    8.36
   5  -3  -1  130.62   11.16
  -5   3   1  113.63   10.68
  -5  -3   1   96.19    7.42
   5   3  -1   98.63    9.62
  -4  -3   1   36.86    5.83
   4   3  -1   32.78    6.06
   4  -3  -1   49.95    7.69
  -4   3   1   35.68    3.61
  -4  -3   1   29.89    4.27
  -4   3   1   28.56    6.40
   3  -3  -1  116.21   10.11
   3   3  -1  115.45    9.61
  -3   3   1  102.35    9.92
   3  -3  -1  115.58   13.65
  -3  -3   1   99.05    7.87
  -3   3   1  106.62    7.17
  -3  -3   1   99.18    8.20
  -2   3   1  168.38   12.99
  -2   3   1  183.00   10.28
   2   3  -1  171.58   11.81
   2  -3  -1  187.14   12.95
   2  -3  -1  150.31   16.67
  -2  -3   1  167.64   11.10
  -2  -3   1  165.22   10.92
  -1  -3   1   34.92    5.14
  -1   3   1   39.48    4.79
  -1   3   1   37.66    6.36
  -1  -3   1   51.23    5.67
   1   3  -1   48.41    5.38
   1  -3  -1   45.20    6.13
   0  -3   1   30.70    5.17
   0   3  -1   24.19    4.16
   0   3   1   19.45    3.83
   0  -3   1   27.63    4.73
   0  -3  -1   30.64    5.04
   0  -3  -1   29.44    4.87
  -1  -3  -1    0.25    1.41
  -1  -3  -1    0.53    1.71
   1  -3   1   -1.26    1.52
  -1   3  -1    2.86    1.87
  -1   3  -1    3.21    1.44
   1   3   1    1.70    1.95
  -2   3  -1    3.85    2.54
  -2  -3  -1    8.06    2.85
  -2   3  -1    6.98    1.84
  -2  -3  -1    5.56    2.46
   2   3   1    7.72    3.37
   2  -3   1    6.52    2.82
   3   3   1   14.09    4.04
  -3  -3  -1   12.71    3.45
   3  -3   1   14.30    4.15
  -3   3  -1   15.74    4.63
  -3  -3  -1   13.51    3.45
   3  -3   1   58.50   19.31
  -3   3  -1   10.26    2.18
   4  -3   1  115.67   10.02
   4  -3   1   39.25   20.78
  -4   3  -1   82.40    9.08
  -4  -3  -1   82.90    7.07
   4   3   1   89.79    8.81
  -4  -3  -1   83.19    7.47
   6   3   1  242.46   16.34
  -6   3  -1  227.53   16.01
  -6  -3  -1  220.90   13.36
  -6  -3  -1  236.65   14.27
   6  -3   1  224.82   16.36
   7  -3   1   22.99   24.70
  -7   3  -1    0.23    2.11
  -7  -3  -1   -2.33    1.42
   7  -3   1   -1.01    2.45
   7   3   1   -0.51    2.19
  -7  -3  -1   -1.42    1.74
   8  -3   1    7.01    3.73
  -8  -3  -1    3.28    2.48
  -8   3  -1    5.06    3.65
   8   3   1    2.30    3.30
   8  -3   1   38.14   29.48
   9  -3   1   17.30   29.21
  -9   3  -1    4.90    3.71
   9   3   1   16.41    5.45
  -9  -3  -1   17.02    4.83
   9  -3   1   22.68    6.13
  10  -3   1    7.80    3.55
  10  -3   1   15.38   28.25
  10   3   1    6.87    4.30
 -10   3  -1    1.65    3.81
 -10  -3  -1    3.51    3.01
 -11   3  -1    2.56    4.28
 -11  -3  -1    4.31    3.02
  11   3   1    7.61    4.28
  11  -3   1   -0.48   27.58
 -12   3  -1    2.67    4.83
  12   3   1    0.33    3.54
  12  -3   1    8.09   31.86
 -12  -3  -1   -0.30    1.86
 -13   3  -1    0.90    4.37
 -13  -3  -1    0.69    2.24
  13   3   1   -2.02    3.82
  13  -3   1   16.51   35.41
 -11  -4   1    5.77    3.68
  11   4  -1    7.57    5.04
  11  -4  -1   64.12   35.71
 -10  -4   1    0.16    2.29
  10   4  -1    2.38    3.54
  10  -4  -1    1.69    4.60
  10  -4  -1   30.64   32.15
 -10   4   1    6.40    4.76
   9  -4  -1   12.22   27.21
  -9  -4   1    2.94    3.01
   9   4  -1    4.13    3.74
  -9   4   1   -0.82    3.46
   9  -4  -1    7.44    5.04
   8  -4  -1   12.19   27.19
   8  -4  -1   53.94   10.28
   8   4  -1   39.10    8.43
  -8   4   1   34.42    8.41
  -8  -4   1   35.25    6.84
   7  -4  -1   53.05   10.18
   7   4  -1   27.58    6.90
  -7  -4   1   53.23    8.45
  -7   4   1   29.02    7.72
   6   4  -1   89.89   10.20
  -6   4   1   70.53   11.78
   6  -4  -1  119.13   12.50
  -6  -4   1   89.77    9.43
  -6  -4   1   92.35    8.34
  -5  -4   1   46.97    7.59
  -5  -4   1   43.84    6.27
   5  -4  -1   43.98    8.66
  -5   4   1   58.79   10.82
   5   4  -1   51.99    8.38
   4  -4  -1    0.74    2.48
  -4   4   1    2.94    3.38
  -4  -4   1    0.23    1.82
   4   4  -1    1.27    2.11
  -4  -4   1   -1.51    1.57
   3   4  -1    1.70    2.28
  -3  -4   1    1.51    2.35
  -3   4   1    2.19    3.14
  -3  -4   1    1.99    2.28
   3  -4  -1    0.29    2.80
  -2   4   1    1.45    1.98
  -2  -4   1    0.34    1.66
   2   4  -1    4.93    2.92
  -2  -4   1    1.10    2.07
   2  -4  -1    1.88    3.25
  -2   4   1    2.58    2.95
   1  -4  -1   76.37    8.55
   1   4  -1   63.46    6.93
  -1  -4   1   65.38    8.09
  -1   4   1   58.48    6.27
  -1  -4   1   59.44    6.96
  -1   4   1   55.67    8.77
   0   4  -1   14.27    3.74
   0   4  -1    6.75    3.25
   0  -4   1   26.70    5.72
   0   4   1   16.99    4.19
   0   4   1   11.14    4.18
   0  -4  -1   19.08    5.22
   1  -4   1    1.99    2.18
  -1  -4  -1   -1.37    1.23
  -1  -4  -1    1.00    2.31
  -1   4  -1    2.18    1.87
  -1   4  -1    1.29    2.27
   1   4   1   -0.09    1.54
  -2  -4  -1  175.27   11.89
  -2  -4  -1  153.85   11.89
   2   4   1  166.52   12.62
   2  -4   1  192.23   13.85
  -2   4  -1  138.38   13.48
   3   4   1    5.85    3.12
   3  -4   1    1.75    2.83
  -3  -4  -1    1.64    2.14
  -3  -4  -1    2.22    2.30
  -3   4  -1    1.57    3.10
  -4   4  -1   50.13   10.16
  -4  -4  -1   53.78    6.43
   4   4   1   53.56    8.20
  -4  -4  -1   54.93    7.72
   4  -4   1   70.84   10.02
  -5   4  -1   -0.52    2.65
   5  -4   1    1.19    3.25
  -5  -4  -1    0.83    1.76
  -5  -4  -1   -1.62    1.72
   5   4   1    0.88    2.47
   6  -4   1    0.36    3.52
  -6   4  -1   -0.13    3.34
   6   4   1   -0.52    2.55
  -6  -4  -1    1.46    2.31
  -6  -4  -1    0.45    2.17
   7  -4   1   -0.54    3.38
   7   4   1   -0.97    2.20
  -7   4  -1    0.29    2.91
   7  -4   1   38.28   33.43
   8   4   1    6.97    4.35
   8  -4   1   -5.42   32.28
  -8  -4  -1    4.03    2.34
  -8   4  -1    5.27    3.97
   8  -4   1   13.16    5.21
   9  -4   1   20.68    6.16
  -9   4  -1   12.12    5.24
   9  -4   1   -2.40   32.87
  -9  -4  -1   18.93    5.34
   9   4   1    9.58    5.22
  10  -4   1    0.88    3.53
 -10   4  -1    2.15    3.85
  10  -4   1   -9.33   33.39
 -10  -4  -1    2.98    2.95
  10   4   1    4.79    4.24
  11   4   1   -5.56    3.36
 -11   4  -1   -5.84    3.33
 -11  -4  -1   -0.15    2.43
  11  -4   1   -2.08   36.14
  -9   5   1    4.46    4.29
   9  -5  -1    4.41    4.89
  -9  -5   1   -1.34    2.30
   9   5  -1    0.21    3.04
  -8   5   1    1.43    3.27
   8  -5  -1    5.11    4.51
   8   5  -1    2.33    2.84
  -8  -5   1    0.69    2.91
  -7  -5   1   -1.81    2.12
   7  -5  -1   -3.92    3.50
   7   5  -1   -0.67    2.70
  -7   5   1    0.18    4.54
  -6   5   1   -0.65    3.87
  -6  -5   1    0.90    3.17
   6  -5  -1    1.83    3.55
   6   5  -1    3.84    3.39
  -5  -5   1    0.28    2.53
  -5  -5   1    1.02    2.92
  -5   5   1    2.15    4.23
   5   5  -1    1.32    3.07
   5  -5  -1    1.04    3.13
   4  -5  -1   72.71   10.64
   4   5  -1   58.94    9.24
  -4   5   1   81.52   13.28
  -4  -5   1   86.39   10.72
  -4  -5   1   81.05    8.80
  -3   5   1   13.85    6.04
   3  -5  -1   11.92    4.69
  -3  -5   1    6.52    3.71
   3   5  -1    6.88    3.51
  -3  -5   1    7.50    3.72
  -2  -5   1    2.57    3.21
  -2   5   1    2.16    3.38
  -2  -5   1    3.15    3.06
   2   5  -1    3.08    2.64
   2  -5  -1   -0.85    3.06
   1   5  -1   -2.93    1.80
   1  -5  -1   -1.02    2.90
  -1   5   1   -1.74    2.47
  -1  -5   1    1.15    2.65
   1   5  -1    3.80    2.06
   0  -5   1    1.26    2.60
   0   5   1   -0.61    1.96
   0  -5  -1    2.56    3.00
   0   5   1    1.50    2.51
   0   5  -1   -2.61    2.29
   1  -5   1    0.58    2.93
  -1   5  -1    0.25    2.72
   1   5   1    1.83    2.30
   1   5   1    4.81    3.18
  -1  -5  -1    1.72    2.92
  -2   5  -1    1.66    3.42
   2  -5   1   -2.41    2.75
   2   5   1   -0.77    2.19
  -2  -5  -1   -0.46    2.39
  -2  -5  -1   -3.27    1.91
  -3  -5  -1    4.75    3.47
  -3  -5  -1   -0.72    2.19
  -3   5  -1    6.76    4.17
   3   5   1    2.26    2.84
   3  -5   1    2.24    3.38
   4  -5   1   63.07   10.10
  -4  -5  -1   81.30   10.33
   4   5   1   50.67    8.90
  -4   5  -1   71.24   13.01
  -4  -5  -1   78.04    8.81
  -5  -5  -1   -0.16    2.55
  -5  -5  -1   -3.11    1.92
   5   5   1   -2.42    2.50
   5  -5   1    4.81    4.08
  -5   5  -1   -1.58    3.81
   6  -5   1    6.21    4.43
   6   5   1    4.57    3.35
  -6  -5  -1    6.56    3.51
  -6   5  -1    0.30    4.35
  -7  -5  -1   13.12    4.34
   7  -5   1    4.10    4.35
  -7   5  -1    8.54    5.30
   7   5   1    2.74    3.89
   8  -5   1    2.99    4.03
   8   5   1    4.99    3.91
  -8   5  -1    9.51    4.93
  -8  -5  -1    6.72    3.41
  -4  -6   1    4.60    3.09
  -4   6   1   -3.47    3.51
   4  -6  -1    0.35    2.83
   4   6  -1    2.09    2.76
  -4  -6   1    4.93    3.09
   3  -6  -1    7.93    4.47
  -3   6   1   -1.01    3.89
  -3  -6   1    4.74    3.06
   2   6  -1    4.28    3.61
   2  -6  -1    3.21    3.29
  -2   6   1    1.15    3.47
  -2  -6   1    1.13    2.77
   1  -6  -1   14.03    5.37
  -1   6   1    5.69    4.36
  -1  -6   1   16.42    5.46
   1   6  -1   11.32    5.18
   0   6   1   18.84    6.02
   0  -6   1   12.43    5.09
   0   6  -1   13.63    5.50
   0  -6  -1   12.70    4.95
   1   6   1    3.46    3.29
  -1  -6  -1   -1.33    3.38
   1  -6   1    1.78    3.46
  -1   6  -1    0.17    3.58
   2  -6   1   18.91    5.62
  -2   6  -1   11.61    6.36
  -2  -6  -1   19.81    5.79
   2   6   1    9.10    4.57
  -3  -6  -1    3.57    3.21
   3   6   1   -2.91    2.48
  -3  -6  -1   -5.79    2.45
   3  -6   1   -0.12    3.53
  -3   6  -1    4.42    4.38
  -4  -6  -1    1.62    3.02
   4  -6   1    1.18    3.34
 -15   0   2    8.72    4.30
  15   0  -2  -19.81   18.25
 -14   0   2    3.99    4.13
  14   0  -2    4.17   16.43
  13   0  -2   -5.47   14.82
 -13   0   2    1.50    4.29
  12   0  -2   -5.84   15.61
  12   0  -2    7.95    4.44
 -12   0   2   -1.41    3.79
 -11   0   2    1.89    4.13
  11   0  -2  -11.81   11.57
 -10   0   2    2.75    4.08
 -10   0   2    2.06    2.25
  10   0  -2    3.05   11.63
   9   0  -2   -4.96   13.65
  -9   0   2   -1.78    1.56
  -9   0   2   -0.39    3.53
  -8   0   2   -0.48    2.83
   8   0  -2   -2.97   10.63
  -8   0   2    3.49    1.80
  -7   0   2   -1.27    2.35
  -7   0   2   -1.25    1.16
  -7   0   2    0.05    0.78
   7   0  -2   -0.94   10.64
  -6   0   2   67.22    5.95
  -6   0   2   73.88    5.28
   6   0  -2   73.55   10.83
   5   0  -2    0.94    8.09
  -5   0   2   -0.12    2.12
   5   0  -2   -0.13    0.36
  -5   0   2   -1.67    0.93
   4   0  -2 2728.99  104.67
  -4   0   2 2564.58   96.49
  -4   0   2 2666.55   98.80
  -3   0   2    0.35    1.97
   3   0  -2    4.19    6.14
  -3   0   2   -0.68    0.82
  -2   0   2 1848.61   66.85
  -2   0   2 1747.66   64.91
  -1   0   2   -1.11    0.51
   1   0  -2   -1.55    3.12
  -1   0   2    0.07    0.88
   1   0  -2   -1.11    0.74
  -1   0  -2   -2.28    1.04
  -1   0  -2   -0.54    1.00
   1   0   2   -1.56    0.79
   1   0   2   -8.51    5.05
  -2   0  -2 5501.12  201.16
   2   0   2 6002.51  207.07
  -2   0  -2 5401.16  221.28
   3   0   2   -1.06    0.97
  -3   0  -2   -1.25    1.17
  -3   0  -2    1.83    2.21
   3   0   2    2.44    9.81
   4   0   2  132.97   13.82
  -4   0  -2  125.59    7.61
   4   0   2  133.27    7.22
  -4   0  -2  133.21    8.83
  -5   0  -2   -0.73    1.22
   5   0   2   -3.32    9.68
  -5   0  -2   -0.04    2.07
   5   0   2   -0.46    0.92
   6   0   2   78.11    5.87
  -6   0  -2   85.29    6.99
  -6   0  -2   87.09    7.15
   7   0   2   -0.66   12.48
  -7   0  -2   -0.08    2.71
  -7   0  -2    0.14    1.61
   7   0   2    1.42    1.43
  -8   0  -2   37.06    5.94
  -8   0  -2   46.30    5.80
   8   0   2   43.13    4.72
  -9   0  -2    2.86    4.27
   9   0   2   -1.24   11.15
   9   0   2    1.74    1.73
 -10   0  -2  268.75   17.24
  10   0   2  282.97   16.00
 -11   0  -2   -0.32    3.88
  11   0   2    5.00   14.04
  12   0   2   10.79   15.31
 -12   0  -2    3.04    4.09
  13   0   2  -19.63   15.59
 -13   0  -2    4.15    4.50
  14   0   2   -0.43   15.31
 -14   0  -2   20.23    6.47
  15   1  -2    2.17   11.90
  15  -1  -2   13.51   23.00
 -15   1   2    4.68    4.16
 -15  -1   2    6.06    3.15
 -14   1   2   -1.53    4.72
  14   1  -2   11.88   13.18
  14   1  -2   -1.88    3.65
  14  -1  -2   13.39   18.69
 -14  -1   2   10.83    4.07
  13   1  -2   -0.33    3.14
  13  -1  -2   11.17   18.93
 -13   1   2    1.65    4.98
 -13  -1   2    0.49    3.21
  13   1  -2    1.89    9.99
  12   1  -2   -0.41    3.18
  12  -1  -2   -0.48   14.95
 -12  -1   2    1.60    2.89
 -12   1   2    3.40    4.43
  12   1  -2    5.73   11.83
 -11   1   2    4.94    5.62
  11   1  -2    1.93    3.10
 -11  -1   2    5.63    3.79
  11   1  -2  -10.13    9.05
  11  -1  -2  -17.46   16.90
  10  -1  -2   -3.79   14.19
 -10   1   2    7.73    2.55
  10   1  -2    4.14   11.36
 -10  -1   2    8.02    3.93
  10   1  -2    7.52    3.71
 -10   1   2    8.17    5.83
   9  -1  -2   -7.49   11.55
   9   1  -2   -0.24    2.37
   9   1  -2    1.05   12.67
  -9   1   2    4.11    1.80
  -9  -1   2    5.04    3.14
  -9   1   2    8.22    5.51
  -8   1   2   69.32    5.41
  -8  -1   2   66.91    6.40
  -8   1   2   75.43    8.65
   8  -1  -2   71.17    4.81
  -7  -1   2  119.41    7.88
   7  -1  -2  115.44    7.20
  -7  -1   2  121.10    8.54
  -7   1   2  130.36    9.84
  -7   1   2  134.85    7.41
  -6  -1   2   39.73    4.28
  -6   1   2   41.69    3.47
   6  -1  -2   40.16    4.04
  -6   1   2   48.44    6.11
  -6  -1   2   48.18    4.68
  -5   1   2  296.07   14.56
  -5  -1   2  273.07   13.73
  -5   1   2  292.39   12.22
   5  -1  -2  231.64   13.61
  -5  -1   2  277.72   11.57
  -5  -1   2  269.78   12.68
  -4  -1   2  259.76   10.77
   4  -1  -2  215.88   12.75
  -4  -1   2  244.40   11.34
  -4  -1   2  234.72   12.08
  -4   1   2  256.77   12.71
  -4   1   2  249.22   10.84
  -3   1   2 3913.56  136.73
  -3  -1   2 3625.07  139.42
  -3  -1   2 4011.36  147.06
   3  -1  -2 3377.51  148.27
  -3   1   2 3774.68  138.42
  -3  -1   2 3826.52  135.21
  -2  -1   2 3967.16  147.52
  -2   1   2 3751.77  138.80
  -2  -1   2 3691.31  135.22
  -2  -1   2 3783.23  139.46
  -2   1   2 3637.44  136.49
  -1   1   2  291.49   12.78
  -1  -1   2  276.55   12.61
  -1   1   2  296.87   13.35
  -1  -1   2  281.23   20.71
  -1  -1   2  309.39   12.84
  -1  -1   2  322.48   13.48
   1  -1  -2  296.16   13.92
   0  -1   2    0.93    0.93
   0  -1   2   -0.32    0.77
   0   1   2    0.12    1.07
   0  -1  -2    0.47    0.88
   0  -1   2   -0.08    0.92
   0  -1  -2    1.39    1.57
   0  -1   2   -2.51    6.07
   1  -1   2 1559.37   61.75
  -1  -1  -2 1573.09   61.83
  -1   1  -2 1553.39   57.86
   1   1   2 1493.64   58.61
  -1  -1  -2 1504.36   56.20
  -2  -1  -2  272.79   13.31
   2   1   2  281.32   13.50
   2  -1   2  296.55   13.33
  -2   1  -2  272.06   13.43
  -2  -1  -2  288.92   11.99
  -3  -1  -2  925.95   35.18
   3  -1   2  868.53   38.21
   3   1   2  980.88   37.90
  -3  -1  -2  913.99   38.32
  -3   1  -2  955.75   37.05
   4  -1   2   -7.46   11.40
   4   1   2    2.31    1.57
  -4  -1  -2    1.31    1.47
  -4  -1  -2    0.91    1.85
  -4   1  -2    0.68    1.42
   4   1   2   -2.47    5.37
   4  -1   2    0.40    0.84
   5   1   2  722.75   31.12
   5  -1   2  735.95   30.47
  -5  -1  -2  708.31   30.66
  -5   1  -2  709.78   30.64
  -5  -1  -2  696.31   28.59
   6  -1   2    5.05    1.51
   6   1   2   -0.72    7.95
  -6  -1  -2    7.94    2.52
   6  -1   2   -2.52   10.86
  -6  -1  -2    5.28    2.32
  -6   1  -2    5.54    2.84
   6  -1   2    5.12    1.43
   6   1   2    3.72    1.92
  -7  -1  -2  194.91   10.96
   7   1   2  192.87   12.18
   7  -1   2  202.99    9.73
  -7   1  -2  190.72   12.84
   7  -1   2  183.11    9.93
  -7  -1  -2  187.66   10.82
   8   1   2  255.55   15.16
  -8   1  -2  238.16   15.51
  -8  -1  -2  254.17   13.87
  -8  -1  -2  254.28   13.62
   9   1   2    0.52    1.69
  -9   1  -2   -0.20    2.24
   9  -1   2   19.56   16.85
  -9   1  -2   -2.90    3.92
   9   1   2    2.08    9.81
  -9  -1  -2    0.37    2.76
  10   1   2   29.14    5.69
  10  -1   2   -1.79   12.31
 -10   1  -2   33.19    7.75
 -10  -1  -2   28.92    5.44
  11   1   2   67.73    8.71
 -11  -1  -2   75.33    7.77
 -11   1  -2   49.27    8.76
 -12   1  -2   28.98    7.76
  12   1   2   43.66    7.72
 -12  -1  -2   28.33    5.84
  12  -1   2   -1.21   15.53
  13  -1   2   16.27   21.23
 -13  -1  -2   15.51    4.62
 -13   1  -2   11.42    6.06
  13   1   2    1.31   11.37
 -14  -1  -2    5.62    3.37
 -14   1  -2    7.26    5.56
  14   1   2   -2.94   11.20
  14  -1   2   -3.55   22.10
 -14   2   2   -4.06    4.39
  14  -2  -2    5.56   28.60
  14   2  -2   -0.49    4.02
 -14  -2   2    1.57    2.38
  13  -2  -2   18.26   26.24
 -13   2   2    2.33    5.29
  13   2  -2   -0.61    9.74
 -13  -2   2    7.53    3.52
  13   2  -2    7.70    4.39
  12  -2  -2   30.32   25.43
 -12  -2   2   40.51    6.55
  12   2  -2   38.80    8.70
 -12   2   2   37.16    8.90
 -11  -2   2   12.18    3.84
  11   2  -2   -3.40    8.26
  11  -2  -2    1.09   18.43
  11   2  -2   18.75    6.62
 -11   2   2   10.25    5.82
 -10  -2   2   -0.49    2.08
  10   2  -2    0.12    2.67
  10   2  -2    5.39    9.67
 -10   2   2    3.27    4.69
  10  -2  -2   15.93   17.22
   9  -2  -2    6.46   17.18
  -9  -2   2    1.30    2.34
   9   2  -2    4.08   10.42
   9  -2  -2    1.84    1.78
   9   2  -2    3.78    3.22
  -9   2   2    2.75    4.13
   8  -2  -2    9.80   14.72
   8   2  -2   -3.21    8.63
  -8   2   2   24.87    5.63
   8   2  -2   19.84    5.56
   8  -2  -2   15.63    4.04
  -8  -2   2   19.63    4.16
  -7   2   2   85.08    8.32
   7   2  -2   88.55    8.97
   7  -2  -2  103.60   14.01
   7  -2  -2   97.82    8.99
  -7  -2   2   95.36    7.45
  -7   2   2   98.24    5.97
  -6  -2   2 1329.63   49.75
  -6   2   2 1309.76   52.13
   6   2  -2 1267.44   53.99
  -6  -2   2 1257.93   51.13
   6  -2  -2 1106.63   55.02
  -6   2   2 1252.45   48.30
  -5  -2   2 1100.17   41.29
  -5  -2   2 1026.59   42.14
   5  -2  -2  932.93   46.08
  -5   2   2  996.08   42.67
   5   2  -2 1001.29   44.25
  -5   2   2 1023.77   39.53
   4  -2  -2  939.99   49.88
  -4  -2   2 1162.66   44.98
   4   2  -2 1152.11   48.32
  -4  -2   2 1187.24   47.39
  -4   2   2 1229.19   47.72
  -4   2   2 1178.08   44.25
   3   2  -2  209.63   12.71
  -3  -2   2  229.52   11.62
   3  -2  -2  210.68   12.97
  -3   2   2  220.82   13.14
  -3   2   2  203.46   10.30
  -3  -2   2  209.40   11.33
   2  -2  -2    1.99    6.38
  -2  -2   2    7.75    2.13
   2   2  -2    5.59    2.37
  -2   2   2    5.15    2.41
  -2  -2   2    5.02    2.00
   2  -2  -2    1.02    1.76
  -2   2   2    5.18    1.92
  -1  -2   2  208.15   12.37
   1  -2  -2  238.49   13.27
  -1   2   2  239.21   11.86
  -1  -2   2  251.50   12.41
   1   2  -2  233.04   12.43
  -1   2   2  247.61   13.58
   0  -2   2   40.43    4.34
   0  -2  -2   57.47    5.32
   0  -2   2   60.42    5.12
   0   2  -2   61.88    4.80
   0   2   2   56.26    4.96
   0  -2  -2   59.64    4.72
   1  -2   2  188.01   11.90
  -1   2  -2  216.73   12.93
  -1  -2  -2  231.15   11.27
   1   2   2  217.05   11.97
  -1  -2  -2  220.23   11.95
  -1   2  -2  221.16   10.52
  -2   2  -2  674.40   30.51
  -2  -2  -2  674.37   28.07
   2   2   2  677.90   30.00
  -2  -2  -2  701.17   30.29
  -2   2  -2  666.04   26.63
   2  -2   2  689.90   31.17
  -3   2  -2   11.23    3.41
  -3  -2  -2   11.91    2.76
   3  -2   2   -3.20   15.72
   3   2   2   14.30    3.53
  -3  -2  -2   17.35    3.17
   3  -2   2   10.15    3.08
   4  -2   2   -0.10    1.32
   4  -2   2  -10.78   14.63
   4   2   2    1.83    1.86
  -4   2  -2    2.43    1.69
  -4  -2  -2   -0.42    1.35
  -4  -2  -2   -0.21    1.21
  -5  -2  -2  598.40   24.92
  -5   2  -2  553.30   26.82
   5  -2   2  551.69   27.27
  -5  -2  -2  583.81   25.91
   5   2   2  567.13   27.48
   6   2   2  211.19   14.15
   6  -2   2  258.92   13.75
  -6  -2  -2  214.38   12.34
  -6   2  -2  192.26   13.46
  -6  -2  -2  234.36   12.51
  -7  -2  -2   16.80    3.80
  -7  -2  -2    9.92    3.02
   7  -2   2   11.95    3.12
  -7   2  -2   13.19    4.03
   7  -2   2    3.51   15.66
   7   2   2   13.63    4.19
   7   2   2    1.29    7.38
   8   2   2    0.61    8.16
   8   2   2    0.40    1.91
   8  -2   2  -12.29   18.52
  -8   2  -2   -0.16    2.84
  -8  -2  -2   -0.01    1.73
   8  -2   2    0.99    1.52
  -9   2  -2   10.29    4.67
   9  -2   2    0.64   20.58
  -9  -2  -2   12.48    3.82
   9   2   2   17.72    5.15
   9   2   2   -1.32    8.13
   9  -2   2   18.51    3.63
 -10   2  -2   35.19    7.50
  10   2   2   47.08    8.00
 -10  -2  -2   44.40    6.36
  10  -2   2   13.56   22.76
  10  -2   2   47.24    4.99
 -11   2  -2    3.89    4.69
  11  -2   2    8.98   26.45
  11   2   2   -5.36    7.17
 -11  -2  -2    6.36    2.86
  11   2   2    8.24    4.16
  12  -2   2    9.97   27.97
 -12  -2  -2   18.21    4.72
  12   2   2   18.26    5.74
 -12   2  -2    6.77    5.45
 -13   2  -2    3.71    5.47
 -13  -2  -2    9.73    3.55
  13  -2   2    1.83   28.72
  13   2   2    7.94    4.82
  14  -2   2   -9.82   30.55
 -14  -2  -2    6.32    3.23
  14   2   2    2.10    3.42
 -14   2  -2   -4.02    4.72
 -13   3   2    5.03    5.84
 -13  -3   2    1.86    3.01
  13  -3  -2   31.73   31.67
  13   3  -2    1.00    4.09
 -12  -3   2    8.37    3.81
  12   3  -2    4.18    4.17
  12  -3  -2   14.64   25.27
 -12   3   2   -0.18    4.62
 -11  -3   2    0.69    2.51
 -11   3   2   -1.16    4.16
  11  -3  -2   14.15   24.11
  11   3  -2   -0.88    3.63
  10  -3  -2    7.37    4.33
 -10   3   2    5.45    4.68
   9   3  -2  333.12   22.49
  -9  -3   2  359.40   19.92
   9  -3  -2  415.00   23.91
  -9   3   2  275.47   20.05
   8  -3  -2   36.72    8.16
  -8  -3   2   30.19    5.71
   8   3  -2   47.08    8.42
  -8   3   2   32.02    6.98
  -7  -3   2   51.77    6.96
   7  -3  -2   61.43   19.53
  -7   3   2   49.87    7.94
   7  -3  -2   58.01    9.15
   7   3  -2   36.93    7.31
   6   3  -2    4.16    3.08
   6  -3  -2   -0.05    2.37
   6  -3  -2   15.35   14.02
  -6  -3   2    7.09    2.39
  -6  -3   2   10.18    3.69
  -6   3   2    7.50    3.23
   5  -3  -2   15.07    5.11
  -5  -3   2   16.34    3.31
  -5   3   2   19.40    5.33
   5   3  -2   14.40    4.41
  -5  -3   2   16.80    4.23
  -5   3   2   11.65    2.43
  -4  -3   2   61.81    5.90
  -4   3   2   71.22    5.43
  -4   3   2   82.27    9.84
  -4  -3   2   79.46    7.27
   4   3  -2   72.44    7.67
   4  -3  -2   52.00    7.91
  -3   3   2   77.11    6.19
  -3   3   2   94.18    9.18
  -3  -3   2   71.92    6.82
  -3  -3   2   79.27    6.67
   3  -3  -2   72.34    7.98
   3   3  -2   67.61    7.33
  -2  -3   2   73.72    6.58
  -2  -3   2   71.50    6.71
  -2   3   2   78.59    6.30
  -2   3   2   77.25    8.23
   2   3  -2   73.74    7.15
   2  -3  -2   63.67    6.93
   1  -3  -2    5.23    2.80
  -1  -3   2    4.67    2.15
  -1  -3   2    4.54    2.24
  -1   3   2    3.21    2.29
   1   3  -2    5.20    2.43
  -1   3   2    7.13    2.55
   0  -3   2  404.10   20.98
   0  -3  -2  405.03   19.72
   0   3  -2  398.95   19.56
   0   3   2  394.93   19.96
   0  -3  -2  397.23   21.16
  -1  -3  -2    4.64    2.61
  -1  -3  -2    4.92    2.15
   1  -3   2   11.41    9.62
   1  -3   2    5.34    2.41
   1   3   2    5.12    2.66
  -1   3  -2    3.40    1.80
  -1   3  -2    3.20    2.43
   2   3   2    8.14    3.34
  -2  -3  -2   12.81    3.36
  -2  -3  -2   10.74    3.27
   2  -3   2   13.07   10.10
  -2   3  -2    9.01    2.16
  -2   3  -2   10.87    3.96
   2  -3   2    5.86    2.89
  -3   3  -2    3.40    2.72
   3   3   2    7.27    3.16
  -3   3  -2    6.52    1.71
   3  -3   2    4.39    2.67
  -3  -3  -2    4.84    2.27
   3  -3   2   20.42   14.75
  -3  -3  -2    8.70    2.98
   5   3   2   10.07    3.86
  -5  -3  -2   18.40    4.18
   5  -3   2   13.35    4.17
   5  -3   2   17.41   19.96
  -5   3  -2   11.80    4.41
  -5  -3  -2   14.61    3.52
  -7  -3  -2  121.00    8.80
   7   3   2  122.09   11.29
  -7  -3  -2  108.36    9.04
  -7   3  -2   94.08    9.89
   7  -3   2  144.20   11.51
   8   3   2   16.55    5.54
   8  -3   2   -0.04   28.46
  -8   3  -2   19.10    5.57
  -8  -3  -2   16.07    4.52
   8  -3   2   15.48    4.97
   9  -3   2   14.05   29.21
  -9   3  -2    2.62    3.13
   9   3   2   -0.08    2.98
  -9  -3  -2    4.01    2.71
   9  -3   2    4.57    3.60
  10   3   2   -3.69    2.58
  10  -3   2    8.01   31.48
 -10   3  -2   -2.47    3.13
 -10  -3  -2    0.68    2.33
  10  -3   2    1.15    2.64
  11   3   2    2.97    3.59
  11  -3   2   12.27   33.24
 -11  -3  -2    0.75    2.01
 -11   3  -2    0.97    3.76
  12  -3   2   48.36   38.64
  12   3   2   -1.36    3.11
  13   3   2   -1.97    4.18
 -13   3  -2   -1.61    4.28
 -13  -3  -2    0.10    2.68
  11  -4  -2   64.73   34.52
 -11   4   2    8.10    5.30
  11   4  -2   13.32    5.52
 -11  -4   2   20.28    5.70
 -10  -4   2    5.56    3.17
  10  -4  -2   13.74   27.72
  10  -4  -2    8.91    5.71
 -10   4   2   -1.75    2.98
  10   4  -2    9.79    4.47
   9   4  -2    2.35    3.35
  -9  -4   2   -1.28    2.01
  -9   4   2    4.19    3.66
   9  -4  -2    2.24    3.95
   9  -4  -2   12.73   24.69
   8  -4  -2    5.06    5.33
  -8   4   2    2.94    2.98
  -8  -4   2    3.15    3.33
   8   4  -2    5.15    3.65
  -7  -4   2   62.64    9.38
   7   4  -2   47.70    8.64
  -7   4   2   41.49    9.16
   7  -4  -2   48.61   10.02
  -6   4   2   29.53    7.84
   6   4  -2   24.54    6.54
  -6  -4   2   28.17    4.91
  -6  -4   2   40.29    7.65
   6  -4  -2   59.78    9.79
   5   4  -2    8.32    3.79
  -5   4   2    6.78    4.44
  -5  -4   2    5.30    2.58
  -5  -4   2   10.97    3.99
   5  -4  -2    7.22    4.75
  -4  -4   2    0.99    2.15
   4   4  -2   -1.50    1.97
   4  -4  -2   -3.20    2.54
  -4  -4   2    1.62    1.79
  -4   4   2   -2.62    2.57
  -3  -4   2   33.27    5.58
  -3  -4   2   36.55    6.64
   3  -4  -2   31.82    7.11
   3   4  -2   25.58    5.60
  -3   4   2   29.28    7.34
  -3   4   2   18.09    3.80
  -2   4   2    0.14    2.55
   2  -4  -2    0.75    2.94
   2   4  -2    3.52    2.42
  -2   4   2    0.36    1.89
  -2  -4   2   -1.76    1.99
  -2  -4   2   -0.28    1.79
  -1  -4   2    0.48    1.87
   1  -4  -2   -1.02    2.12
   1   4  -2    0.37    1.73
  -1  -4   2   -0.51    1.52
  -1   4   2    1.05    2.35
  -1   4   2    1.85    2.11
   0   4  -2   33.47    6.87
   0  -4  -2   54.76    7.64
   0   4  -2   54.94    5.90
   0  -4   2   52.50    7.16
   0   4   2   30.62    6.39
   0   4   2   54.91    6.85
  -1  -4  -2   31.63    5.95
  -1   4  -2   25.58    6.15
   1   4   2   40.64    6.34
   1  -4   2   30.68    5.84
  -1  -4  -2   40.90    6.35
  -1   4  -2   24.93    4.12
   2   4   2    0.30    2.12
  -2   4  -2    2.03    2.57
  -2  -4  -2    5.43    2.48
  -2  -4  -2   -0.38    1.88
   2  -4   2    1.42    2.57
  -3  -4  -2   95.54    8.88
   3   4   2   91.67    9.39
   3  -4   2  117.74   10.87
  -3   4  -2   85.36   12.01
  -3  -4  -2   93.02    8.56
  -4   4  -2   11.69    4.82
  -4  -4  -2    6.93    3.28
  -4  -4  -2    2.96    2.69
   4   4   2   13.70    4.74
   4  -4   2    5.29    4.04
  -5  -4  -2   38.14    6.00
  -5  -4  -2   43.31    7.21
   5  -4   2   28.61    7.13
   5   4   2   33.62    6.96
  -5   4  -2   48.67   10.04
  -6  -4  -2    0.83    1.88
   6  -4   2   -2.37    2.92
  -6  -4  -2    1.59    2.38
  -6   4  -2   -0.91    2.37
   6   4   2   -1.73    2.37
   6  -4   2   19.19   27.15
  -7   4  -2    0.91    2.81
   7  -4   2  -21.47   29.17
  -7  -4  -2    3.40    2.37
   7   4   2    4.39    4.04
   7  -4   2    5.30    4.37
   8  -4   2  -36.26   31.69
  -8  -4  -2    4.09    2.61
  -8   4  -2    4.82    3.20
   8   4   2    5.73    3.58
   8  -4   2   15.38    5.37
   9  -4   2  -55.96   30.99
  -9  -4  -2   12.05    4.23
   9   4   2    1.99    3.75
  -9   4  -2   12.83    5.74
   9  -4   2    7.64    4.76
  10  -4   2  -55.96   35.02
  10  -4   2   19.60    6.20
 -10   4  -2   10.20    4.44
 -10  -4  -2   16.36    5.07
  10   4   2    9.91    5.12
 -11   4  -2   -0.58    3.56
 -11  -4  -2    0.97    2.46
  11   4   2   -2.16    4.36
  11  -4   2  -58.24   35.73
  -9   5   2   -3.71    3.37
  -9  -5   2   -1.24    2.47
   9  -5  -2   -4.16    3.68
   9   5  -2    1.36    3.30
  -8  -5   2   -0.70    2.63
  -8   5   2    0.60    3.27
   8   5  -2    2.90    3.40
   8  -5  -2    0.85    4.42
  -7  -5   2   -6.01    2.19
  -7   5   2    0.88    3.91
   7  -5  -2    0.55    3.47
   7   5  -2    0.98    2.83
  -6   5   2    6.73    4.79
   6  -5  -2    0.59    3.49
  -6  -5   2    8.80    3.79
   6   5  -2   -0.44    2.57
   5  -5  -2    1.40    3.36
  -5  -5   2    0.64    2.11
  -5  -5   2    1.98    2.37
  -5   5   2    1.84    4.32
   5   5  -2    1.82    2.54
  -4  -5   2    0.57    1.80
  -4   5   2    1.92    3.39
   4  -5  -2    1.05    3.24
   4   5  -2   -3.98    2.10
  -4  -5   2    1.11    2.24
  -3  -5   2    2.74    2.47
  -3   5   2   -2.10    2.50
   3  -5  -2    2.68    3.04
   3   5  -2   -1.05    2.15
  -3  -5   2    3.75    2.65
   2  -5  -2    6.70    3.86
  -2  -5   2    0.95    2.45
  -2   5   2    6.16    4.48
   2   5  -2    4.17    2.74
  -2  -5   2    2.86    2.65
  -1   5   2   45.75    9.08
   1   5  -2   40.52    8.16
  -1   5   2   43.67    6.36
   1   5  -2   65.85    7.07
   1  -5  -2   69.65   10.19
  -1  -5   2   62.41    8.40
   0  -5   2   13.86    4.86
   0  -5  -2   19.37    6.05
   0   5   2   16.80    4.42
   0   5  -2   11.24    4.75
   0   5   2   14.47    5.11
  -1  -5  -2    5.65    3.92
  -1   5  -2    2.64    3.32
   1   5   2    0.54    2.31
   1   5   2    2.17    2.47
   1  -5   2    4.82    3.56
   2   5   2    0.28    2.49
  -2  -5  -2    2.82    3.02
   2  -5   2    3.32    3.08
  -2  -5  -2   -0.97    2.10
  -2   5  -2    2.80    3.33
  -3   5  -2    6.23    4.04
   3   5   2    5.89    3.39
   3  -5   2   11.04    4.51
  -3  -5  -2    2.20    2.56
  -3  -5  -2    5.56    3.52
   4  -5   2   -1.10    2.88
  -4   5  -2   -0.58    3.22
  -4  -5  -2    0.44    2.25
  -4  -5  -2    2.04    2.83
   4   5   2    6.92    3.82
   5  -5   2   -1.44    3.35
   5   5   2    6.75    3.58
  -5  -5  -2    1.37    2.31
  -5   5  -2   -1.06    3.84
  -5  -5  -2    3.66    2.53
   6  -5   2   -0.06    3.59
  -6  -5  -2    2.77    2.73
   6   5   2    0.11    2.83
  -6  -5  -2    4.78    2.92
  -6   5  -2    0.03    3.82
  -7  -5  -2    2.40    2.74
   7  -5   2    0.21    3.76
  -7   5  -2   -1.99    3.39
   7   5   2    0.81    2.82
   8   5   2   -4.12    2.85
   8  -5   2    3.77    3.56
  -8  -5  -2   -1.73    2.68
  -8   5  -2   -5.70    2.85
  -4   6   2   -3.76    2.88
   4  -6  -2    0.55    3.34
  -4  -6   2   -0.56    2.25
  -4  -6   2   -1.45    2.27
   3  -6  -2   -1.02    3.28
  -3   6   2    0.27    3.33
  -3  -6   2   -0.45    2.82
  -2   6   2    2.76    3.75
   2  -6  -2    1.45    3.40
   2   6  -2    2.04    3.53
  -2  -6   2   -0.67    2.34
  -1  -6   2    2.34    2.82
   1   6  -2    0.30    2.93
   1  -6  -2   -6.46    2.95
  -1   6   2    2.14    3.34
   0   6  -2    2.71    3.59
   0  -6   2    7.89    4.39
   0   6   2   12.00    4.90
   0  -6  -2    3.68    3.63
  -1  -6  -2   18.64    5.78
   1  -6   2   17.51    5.76
   1   6   2    9.45    4.75
  -1   6  -2   10.03    5.22
   2  -6   2   -3.14    2.84
   2   6   2    1.81    2.57
  -2   6  -2   -2.76    3.24
   2   6   2    4.11    3.83
  -2  -6  -2    2.69    3.00
  -3  -6  -2    2.29    2.89
  -3  -6  -2   -0.79    3.22
   3   6   2    4.12    2.76
   3  -6   2   -1.47    3.08
  -3   6  -2    0.57    3.73
 -15   0   3    6.46    3.97
  15   0  -3   12.67   20.14
  14   0  -3   -8.77   18.61
 -14   0   3    0.04    3.91
 -13   0   3    1.35    3.92
  13   0  -3   -4.09   14.66
 -12   0   3    2.09    3.62
  12   0  -3   -7.79   15.43
 -12   0   3    0.12    2.57
 -11   0   3   -0.07    3.87
 -11   0   3    2.73    2.74
  11   0  -3   -0.97   12.97
 -10   0   3   -1.42    1.83
  10   0  -3    1.20   11.19
 -10   0   3    0.53    3.83
  -9   0   3   99.25    7.54
  -9   0   3  101.93    8.86
   9   0  -3   78.38   13.81
  -8   0   3    2.65    3.32
   8   0  -3   -1.67   11.60
  -8   0   3    1.78    1.60
  -7   0   3  261.81   13.29
  -7   0   3  247.43   13.63
   7   0  -3  268.39   25.57
   6   0  -3   -1.60   10.22
  -6   0   3    0.62    1.28
  -6   0   3    0.36    2.21
   5   0  -3    7.86   10.77
  -5   0   3   16.17    3.16
  -5   0   3   20.16    2.82
   4   0  -3   -0.13    7.92
  -4   0   3   -0.99    1.57
   4   0  -3   -0.46    0.71
  -4   0   3   -0.75    0.96
  -3   0   3  101.30    5.55
   3   0  -3   89.99    4.80
  -3   0   3   96.25    5.36
  -2   0   3   -0.76    1.09
   2   0  -3   -0.37    1.13
  -2   0   3   -0.10    0.87
   2   0  -3   -0.87    4.43
  -1   0   3 1388.06   51.23
   1   0  -3 1362.65   54.76
  -1   0   3 1332.87   49.40
   0   0   3   -3.52    0.80
   0   0  -3   -2.28    1.10
   0   0   3   -4.82    2.62
  -1   0  -3  603.48   21.80
  -1   0  -3  615.32   25.73
   1   0   3  526.37   22.47
   2   0   3    2.55   10.31
  -2   0  -3   -0.23    1.25
   2   0   3   -0.59    0.88
  -2   0  -3    2.20    1.96
  -3   0  -3   10.80    2.44
   3   0   3    8.88    1.76
  -3   0  -3    6.14    2.34
   3   0   3   11.65   14.04
   4   0   3   -0.05    0.90
  -4   0  -3   -1.47    1.13
   4   0   3   -2.70   12.33
  -4   0  -3    1.36    1.93
  -5   0  -3    7.90    2.64
   5   0   3    8.69    2.06
   5   0   3   -0.89   11.60
  -5   0  -3    7.70    2.99
   6   0   3   -0.36    1.07
  -6   0  -3    3.06    2.94
   6   0   3    9.49   13.38
  -7   0  -3  258.43   15.17
  -7   0  -3  241.77   13.70
   7   0   3  224.38   12.43
  -8   0  -3    5.19    3.93
   8   0   3   -2.22   15.20
   8   0   3   -0.95    1.41
  -8   0  -3    1.52    2.15
  -9   0  -3   32.48    5.64
  -9   0  -3   33.60    6.25
   9   0   3   23.99    4.22
   9   0   3   -2.07   12.49
 -10   0  -3    4.77    5.06
  10   0   3    0.59    1.86
  10   0   3    6.50   13.56
  11   0   3    9.49   14.64
 -11   0  -3   13.99    5.68
  12   0   3   10.51   16.48
 -12   0  -3    0.70    3.96
 -13   0  -3   27.11    6.80
  13   0   3  -12.45   14.37
 -14   0  -3    0.21    3.27
  14   0   3    9.19   15.91
 -15   1   3   11.12    5.22
 -15  -1   3   12.21    4.08
  15   1  -3   -9.90   11.99
  15  -1  -3   -9.73   19.80
 -14  -1   3    8.14    3.90
  14  -1  -3   11.50   16.04
  14   1  -3    1.30   12.96
 -14   1   3   -1.46    4.81
  14   1  -3    0.10    4.25
 -13  -1   3    3.76    3.22
 -13   1   3   -4.20    4.34
  13  -1  -3    3.86   16.57
  13   1  -3   -5.70    3.17
  13   1  -3  -10.47   11.53
  12   1  -3    1.35    3.71
  12  -1  -3  -10.60   17.71
 -12  -1   3    1.52    2.79
  12   1  -3    6.56   13.06
 -12   1   3    5.91    5.46
  11   1  -3    6.07    4.08
  11  -1  -3   11.03   20.75
 -11  -1   3    8.82    3.94
  11   1  -3   -0.78   12.63
 -11   1   3    7.66    5.37
  10   1  -3    1.58    9.97
 -10   1   3   14.60    3.36
 -10  -1   3   13.15    4.30
 -10   1   3   11.58    5.49
  10  -1  -3   -0.15   14.41
   9  -1  -3   -3.33   11.80
   9   1  -3   -3.06   12.17
  -9   1   3   -0.09    1.64
  -9   1   3    3.94    5.15
  -9  -1   3    1.54    2.07
  -9  -1   3   -0.80    2.39
  -8  -1   3    7.23    3.03
   8   1  -3    4.44   13.84
  -8   1   3    9.90    2.45
   8  -1  -3    6.37    1.63
  -8  -1   3   10.11    3.27
   8  -1  -3    0.86    9.63
  -8   1   3   10.34    4.73
  -7   1   3  270.04   15.39
  -7  -1   3  266.80   13.35
  -7  -1   3  259.86   14.29
  -7   1   3  274.27   12.81
   7  -1  -3  240.44   13.22
  -6   1   3   15.50    2.56
   6  -1  -3    1.94    7.20
   6  -1  -3   12.87    2.79
  -6  -1   3   16.43    3.39
  -6  -1   3   16.70    3.02
  -6   1   3   14.74    3.83
   6   1  -3    2.22   12.11
  -5  -1   3  327.41   15.72
  -5   1   3  334.49   16.30
   5  -1  -3  321.26   16.77
  -5   1   3  321.98   14.31
  -5  -1   3  331.40   14.78
  -4   1   3   22.88    3.63
  -4  -1   3   28.97    3.54
   4   1  -3    7.80   10.17
  -4  -1   3   22.96    2.82
  -4   1   3   24.79    2.79
   4  -1  -3   20.98    3.46
  -4  -1   3   26.04    1.92
   3   1  -3    1.01    5.64
  -3  -1   3    0.55    1.29
  -3   1   3   -0.51    1.01
   3  -1  -3   -0.49    1.23
  -3  -1   3   -0.47    0.67
  -3  -1   3   -0.24    0.96
   3  -1  -3    0.94    6.97
  -3   1   3   -0.22    1.01
   2  -1  -3 3645.01  136.56
  -2   1   3 3536.80  125.51
  -2  -1   3 3335.38  127.97
  -2  -1   3 3383.00  124.28
  -2   1   3 3303.36  127.63
  -2  -1   3 3517.45  135.25
  -1  -1   3 2555.34   92.70
  -1   1   3 2582.97   93.25
  -1  -1   3 2635.80  156.68
   1  -1  -3 2451.31  101.26
  -1  -1   3 2548.12  100.52
  -1  -1   3 2528.03   94.73
  -1   1   3 2557.33   95.15
   0  -1  -3  825.85   30.75
   0   1   3  818.63   32.37
   0  -1   3  825.96   31.23
   0  -1   3  812.67   33.56
   0  -1  -3  795.34   34.26
   0  -1   3  814.56   31.17
  -1  -1  -3  619.59   23.85
   1   1   3  625.20   25.62
  -1  -1  -3  612.01   26.77
   1  -1   3  655.01   23.75
  -1   1  -3  610.76   25.38
   1  -1   3  608.93   26.24
   2  -1   3 1711.60   74.21
   2   1   3 2018.81  116.11
   2   1   3 1930.75   71.30
  -2  -1  -3 1860.65   67.80
  -2   1  -3 1853.23   69.79
  -2  -1  -3 1796.22   74.72
   3  -1   3  -19.87   16.41
  -3  -1  -3   -0.76    1.91
   3  -1   3    1.20    0.93
   3   1   3    2.16    1.74
  -3   1  -3    0.95    1.03
   3   1   3   -3.93    7.39
  -3  -1  -3    0.04    0.99
   4   1   3   60.11    5.50
  -4  -1  -3   67.71    5.59
  -4   1  -3   68.45    5.75
   4  -1   3   67.76    4.73
  -4  -1  -3   66.68    4.74
   5  -1   3   86.24    5.61
   5   1   3   90.93    6.93
  -5  -1  -3   92.41    6.74
  -5   1  -3   73.53    6.62
  -5  -1  -3   83.43    5.83
   6  -1   3   49.30    4.01
  -6  -1  -3   51.26    5.19
  -6  -1  -3   43.67    4.75
  -6   1  -3   45.77    6.06
   6   1   3   43.76    4.96
  -7   1  -3  117.82    9.78
   7  -1   3  115.66    6.50
  -7  -1  -3  103.37    7.85
   7   1   3  120.53    8.97
  -7  -1  -3  117.14    8.37
   7  -1   3  123.85    7.32
   8   1   3    5.11    2.31
  -8   1  -3    8.82    4.23
  -8   1  -3    8.04    3.82
  -8  -1  -3    8.07    3.41
  -8  -1  -3    3.78    3.30
   8  -1   3    2.33   17.62
   8   1   3    3.09   10.55
  -9   1  -3    3.84    4.69
   9  -1   3    5.80   13.60
   9   1   3    4.99    2.65
  -9   1  -3    5.96    3.58
  -9  -1  -3    1.16    2.87
   9   1   3    5.72   11.06
 -10   1  -3   23.33    6.84
 -10  -1  -3   26.28    5.43
  10  -1   3   -0.99   14.31
  10   1   3   29.55    5.58
  11   1   3    6.63    3.48
 -11  -1  -3    6.86    3.45
 -11   1  -3    6.95    5.58
  11   1   3   -1.25    8.81
  11  -1   3    6.47   16.66
  12   1   3   36.39    6.94
  12  -1   3   -8.79   17.26
 -12   1  -3   29.73    7.79
 -12  -1  -3   39.73    6.89
  13  -1   3   17.64   24.83
 -13  -1  -3   10.14    4.22
  13   1   3   -6.13    8.42
 -13   1  -3    3.46    4.78
 -14   1  -3   -1.21    4.28
  14   1   3   -5.46   10.66
  14  -1   3    2.81   22.56
 -14  -1  -3    9.28    3.57
 -14   2   3    9.38    6.14
  14   2  -3    7.35    5.76
  14   2  -3    7.58   10.30
 -14  -2   3    7.83    3.63
  14  -2  -3   11.50   28.80
 -13  -2   3   15.81    4.26
  13   2  -3   -1.20    8.67
  13   2  -3   15.62    6.91
 -13   2   3   17.35    6.71
  13  -2  -3   20.23   25.02
  12   2  -3    5.88   11.36
  12  -2  -3    9.06   20.80
 -12  -2   3   25.61    5.40
  12   2  -3   27.16    7.56
 -12   2   3   29.45    8.43
  11   2  -3    9.27    4.60
 -11  -2   3    9.86    3.53
  11  -2  -3   -3.70   19.64
 -11   2   3   14.70    6.41
  11   2  -3   -7.79   11.07
  10   2  -3    5.97   10.20
  10   2  -3    4.96    3.91
 -10  -2   3    6.25    2.92
  10  -2  -3   10.27   18.36
 -10   2   3    7.28    5.20
  -9  -2   3    5.60    2.76
  -9   2   3   10.83    5.13
   9   2  -3   -7.02   11.15
   9  -2  -3    8.07    3.08
   9  -2  -3   33.28   19.14
   9   2  -3   10.37    4.16
   8   2  -3    1.26   13.77
   8  -2  -3    7.75    3.19
  -8  -2   3   12.28    3.46
  -8   2   3    4.91    3.84
   8  -2  -3  -15.46   13.23
  -8   2   3    6.73    2.15
   8   2  -3    9.21    3.91
  -7   2   3  259.41   12.23
   7  -2  -3  278.72   16.86
  -7  -2   3  233.33   13.53
   7   2  -3  253.10   16.75
  -7   2   3  230.78   14.94
   6  -2  -3  165.95   12.79
  -6   2   3  169.21    9.19
  -6  -2   3  159.09   10.10
  -6  -2   3  186.06    9.15
  -6   2   3  154.82   11.35
   6   2  -3  178.70   12.93
  -5   2   3  359.87   15.64
  -5   2   3  348.69   18.31
   5  -2  -3  328.35   19.89
  -5  -2   3  337.69   16.78
   5   2  -3  342.02   19.36
  -5  -2   3  349.36   16.07
  -2   2   3  431.37   18.84
  -2  -2   3  432.70   19.30
   2   2  -3  402.56   20.13
  -2  -2   3  390.52   19.28
  -2   2   3  422.28   20.73
   2  -2  -3  441.40   21.18
  -1   2   3   42.01    4.13
  -1  -2   3   44.55    4.25
   1  -2  -3   42.90    4.74
  -1   2   3   35.54    4.97
  -1  -2   3   32.13    6.06
   1   2  -3   39.08    4.20
  -1  -2   3   50.69    4.67
   0  -2   3  175.86   10.57
   0   2   3  179.00   10.34
   0  -2  -3  188.80   10.95
   0  -2   3  178.99   10.30
   0   2  -3  191.41    9.99
   0  -2  -3  194.64    9.82
  -1   2  -3    3.20    2.15
  -1  -2  -3    1.93    1.87
   1  -2   3    1.20    8.46
  -1   2  -3    2.30    1.24
  -1  -2  -3    2.46    1.41
   1   2   3    4.29    2.13
   1  -2   3    0.81    1.37
  -2   2  -3   41.27    5.69
   2   2   3   43.15    5.33
  -2  -2  -3   40.28    4.00
   2  -2   3   42.25    4.56
  -2  -2  -3   39.34    4.33
  -3  -2  -3  122.07    8.37
  -3   2  -3  128.85    9.66
  -3  -2  -3  126.77    7.76
   3   2   3  121.28    9.05
   3  -2   3  133.67    8.95
  -4  -2  -3  516.30   23.59
   4  -2   3  533.58   24.23
  -4   2  -3  476.41   24.10
  -4  -2  -3  499.17   21.88
   4   2   3  470.70   24.11
  -5  -2  -3   92.85    7.16
   5   2   3   92.09    8.26
   5  -2   3  111.81    8.01
  -5  -2  -3  100.94    7.11
  -5   2  -3   90.95    8.08
   6   2   3    0.98    7.88
  -6  -2  -3   20.36    3.85
   6  -2   3    2.04   17.20
  -6  -2  -3   18.85    3.74
   6  -2   3   17.82    3.71
   6   2   3   23.71    4.96
  -6   2  -3   16.33    4.23
   7  -2   3  -11.76   18.09
  -7  -2  -3    3.81    2.42
   7   2   3   -3.78    7.27
   7  -2   3    8.61    2.78
  -7  -2  -3    6.91    3.01
  -7   2  -3    6.58    3.06
   7   2   3    6.15    2.95
  -8   2  -3   78.33    8.65
   8   2   3   74.55    8.43
   8  -2   3  120.14    8.30
  -8  -2  -3  105.26    7.98
   9  -2   3    3.88   22.95
  -9  -2  -3   27.53    5.15
  -9   2  -3   22.30    6.10
   9  -2   3   35.91    4.74
   9   2   3   32.39    6.45
  10   2   3   34.43    6.95
  10  -2   3   38.63    4.87
  10  -2   3   16.14   25.58
 -10  -2  -3   31.20    5.64
 -10   2  -3   26.09    6.67
  11   2   3   39.79    7.69
 -11   2  -3   20.73    6.61
  11  -2   3   13.14   28.64
 -11  -2  -3   36.73    6.05
  12  -2   3    2.43   24.41
  12   2   3    2.35    3.51
 -12  -2  -3    6.32    3.25
 -12   2  -3   -1.69    4.20
 -13   2  -3   -4.70    4.38
  13  -2   3   41.00   34.05
 -13  -2  -3    8.99    3.46
  13   2   3    3.87    3.58
 -13  -3   3    9.69    3.59
  13   3  -3   -3.92    3.52
 -13   3   3    1.05    4.70
  13  -3  -3   20.23   28.53
 -12  -3   3    5.37    3.30
  12   3  -3    2.51    3.99
 -12   3   3    2.19    5.28
  12  -3  -3   17.35   23.44
  11   3  -3    4.87    4.30
 -11   3   3    0.97    4.43
 -11  -3   3    0.85    2.61
  11  -3  -3   12.43   21.49
  10   3  -3  127.30   12.82
 -10  -3   3   87.73    9.11
 -10   3   3   96.88   10.67
   9  -3  -3   24.42   20.29
   9   3  -3   74.51   10.63
   9  -3  -3   83.35   11.22
  -9  -3   3   62.60    8.03
  -9   3   3   51.64    8.71
   8  -3  -3  138.41   19.79
  -8   3   3  165.85   13.61
  -8  -3   3  190.59   12.65
   8   3  -3  206.51   15.41
   7  -3  -3   31.19   14.34
   7   3  -3   35.33    7.02
   7  -3  -3   34.59    7.54
  -7   3   3   49.19    7.72
  -7  -3   3   29.83    5.71
  -6  -3   3    7.75    2.26
  -6   3   3    8.83    3.59
   6  -3  -3   -2.16    9.24
  -6   3   3    7.46    2.23
  -6  -3   3    7.19    3.21
   6  -3  -3   11.19    4.90
   6   3  -3   10.64    3.72
  -5  -3   3   52.65    5.05
  -5   3   3   59.47    8.60
  -5  -3   3   63.49    7.36
   5  -3  -3   23.40   11.51
  -5   3   3   53.07    4.79
   5  -3  -3   45.76    8.09
   5   3  -3   50.17    7.32
  -4  -3   3    1.62    1.40
   4  -3  -3   -2.53    1.75
  -4  -3   3   -0.67    1.46
  -4   3   3    3.44    2.49
   4  -3  -3    5.19    8.39
  -4   3   3    2.69    1.70
   4   3  -3    0.39    1.78
  -3   3   3    3.85    2.24
   3  -3  -3    1.69    2.15
   3   3  -3    2.20    2.11
  -2   3   3   85.35    6.90
  -2  -3   3   81.96    6.87
   2  -3  -3   81.61    7.99
  -2   3   3   87.17    8.81
   2   3  -3   94.43    8.00
  -2  -3   3   93.99    7.74
  -1   3   3  216.03   14.57
  -1  -3   3  231.85   13.61
  -1   3   3  230.77   13.29
  -1  -3   3  221.09   13.49
   1  -3  -3  248.13   14.95
   1   3  -3  228.73   13.60
   1  -3   3   45.61    6.04
   1   3   3   51.00    6.42
  -1   3  -3   43.86    7.13
  -1  -3  -3   53.87    6.02
  -1   3  -3   51.98    4.73
  -1  -3  -3   49.43    5.05
   2  -3   3  408.10   21.98
  -2  -3  -3  412.32   21.03
  -2   3  -3  371.39   22.39
   2   3   3  401.36   21.15
  -2  -3  -3  397.02   19.46
  -2   3  -3  389.80   17.60
  -3  -3  -3   47.26    5.29
  -3  -3  -3   57.62    5.98
   3   3   3   63.28    7.70
   3  -3   3   54.89    6.51
  -3   3  -3   60.89    8.74
   4  -3   3   -0.32    1.62
  -4  -3  -3    3.37    2.03
   4  -3   3   -2.11   15.38
   4   3   3    0.68    2.30
  -4  -3  -3    1.56    1.97
  -4   3  -3   -1.26    1.63
  -5  -3  -3   -2.04    1.44
  -5   3  -3    1.41    1.80
   5  -3   3    2.77    2.38
  -5  -3  -3   -2.25    1.48
   5  -3   3   35.99   22.46
   5   3   3    0.93    2.26
  -6  -3  -3  139.36   10.08
   6  -3   3  170.32   12.30
  -6   3  -3  122.72   11.41
   6   3   3  138.20   11.97
  -6  -3  -3  139.54   10.28
  -7   3  -3    9.35    3.86
  -7  -3  -3    5.17    2.89
   7  -3   3    5.37    3.38
   7  -3   3   18.18   30.01
   7   3   3    3.03    3.03
  -7  -3  -3    5.49    2.77
   8  -3   3   50.27    7.62
   8   3   3   29.38    6.95
   8  -3   3  -11.10   29.50
  -8  -3  -3   32.15    5.92
  -8   3  -3   23.14    5.86
   9  -3   3    9.68    3.87
   9   3   3    3.99    3.21
  -9  -3  -3    6.24    3.20
  -9   3  -3    4.71    3.66
   9  -3   3   -7.83   30.76
  10  -3   3    2.79    2.99
 -10   3  -3    2.57    3.46
  10  -3   3   -9.94   32.44
  10   3   3   -4.09    2.34
 -10  -3  -3    0.94    2.27
 -11   3  -3    4.71    4.44
  11   3   3    3.51    3.37
  11  -3   3  -11.25   33.56
 -11  -3  -3    5.90    3.07
  12  -3   3  -21.94   34.76
 -12  -3  -3   -1.20    2.06
  12   3   3   -1.55    3.14
 -12   3  -3    5.56    4.84
  11  -4  -3   58.46   32.86
  11   4  -3    5.04    4.30
 -11   4   3    2.45    4.48
 -11  -4   3    8.34    3.94
  10   4  -3    9.99    4.84
  10  -4  -3    1.67    4.43
 -10  -4   3    5.52    3.64
  10  -4  -3   42.07   27.31
 -10   4   3   -1.20    3.51
   9   4  -3    5.87    3.80
   9  -4  -3    2.26    4.79
  -9   4   3    3.01    3.79
  -9  -4   3   -1.40    2.42
   8   4  -3    0.21    2.51
   8  -4  -3   -0.90    3.90
  -8   4   3    2.24    3.28
  -8  -4   3    2.09    3.16
  -7   4   3    1.02    3.10
  -7  -4   3    1.49    2.53
   7   4  -3    1.63    2.58
   7  -4  -3    0.83    4.41
   6   4  -3   -0.52    2.39
  -6   4   3    1.62    3.24
  -6  -4   3   -1.13    2.04
   6  -4  -3   -1.43    3.09
  -5  -4   3   25.46    6.15
  -5  -4   3   32.77    4.95
   5   4  -3   31.21    6.68
   5  -4  -3   47.20    8.79
  -5   4   3   40.12    8.82
   4  -4  -3   28.43    7.22
  -4   4   3   17.69    5.84
  -4  -4   3   14.62    4.81
   4   4  -3   19.17    5.13
  -4  -4   3   18.30    4.02
  -3  -4   3    5.47    3.00
   3   4  -3    7.47    3.22
   3  -4  -3   12.40    4.87
  -3  -4   3    8.77    3.13
  -3   4   3    7.05    4.54
  -3   4   3   10.53    3.39
  -2   4   3    2.85    2.48
  -2  -4   3    2.67    2.07
   2  -4  -3   10.38    4.11
  -2  -4   3    2.04    2.22
   2   4  -3    6.32    3.05
  -2   4   3    6.43    3.95
  -1  -4   3    1.67    2.55
   1  -4  -3    1.58    2.48
  -1   4   3    0.40    2.03
  -1   4   3    4.34    2.40
  -1  -4   3   -0.34    1.83
   1   4  -3    4.45    2.32
   0   4   3   52.19    6.86
   0   4  -3   46.99    5.91
   0  -4   3   48.56    6.90
   0   4   3   41.13    7.01
   0   4  -3   38.86    7.25
   0  -4  -3   50.75    7.51
   1   4   3    5.93    2.96
  -1  -4  -3    2.77    2.34
  -1   4  -3    4.67    3.02
  -1  -4  -3    6.92    3.33
   1  -4   3    1.15    2.23
  -2  -4  -3   29.00    5.78
  -2   4  -3   27.96    6.96
   2   4   3   24.07    5.60
  -2  -4  -3   27.35    5.10
   2  -4   3   23.72    5.58
   3  -4   3    0.85    2.10
  -3  -4  -3    2.30    2.47
   3   4   3    0.03    2.15
  -3   4  -3   -2.24    1.83
  -3  -4  -3    0.32    2.24
  -4   4  -3  113.47   12.36
  -4  -4  -3   90.95    8.72
   4  -4   3  120.04   11.32
   4   4   3  108.53   10.70
  -4  -4  -3  103.45    9.40
  -5   4  -3   21.62    6.75
  -5  -4  -3   25.54    5.43
   5  -4   3   32.89    7.19
  -5  -4  -3   26.47    5.28
   5  -4   3   55.62   24.62
   5   4   3   21.86    6.06
  -6  -4  -3    2.55    2.11
  -6   4  -3   -0.09    2.21
  -6  -4  -3    1.42    2.26
   6   4   3    0.52    2.67
   6  -4   3    1.63   22.64
   6  -4   3   -0.71    3.06
   7  -4   3   22.53   29.40
  -8  -4  -3    1.89    2.72
   8  -4   3   60.46   35.21
  -8   4  -3    2.13    2.59
   8   4   3    9.68    4.43
   8  -4   3   -2.91    3.29
   9  -4   3  -13.83   33.38
  -9  -4  -3    1.73    2.62
   9   4   3   16.08    5.53
   9  -4   3   11.95    4.98
  -9   4  -3    4.20    4.10
  10  -4   3  -49.14   34.34
 -10  -4  -3    6.46    3.30
  10   4   3    4.74    4.37
 -10   4  -3    2.62    3.96
  10  -4   3    4.28    4.12
 -11   4  -3    0.42    4.21
  11  -4   3   10.98    5.00
 -11  -4  -3    6.93    3.38
  11   4   3    9.12    4.97
   9   5  -3    4.48    3.03
  -9  -5   3   -0.57    2.96
   9  -5  -3   -8.57    3.70
  -9   5   3   -1.77    3.78
  -8   5   3    5.55    5.15
   8   5  -3    2.73    3.31
   8  -5  -3    6.17    4.57
  -8  -5   3    7.08    4.23
  -7  -5   3   -2.61    2.07
   7  -5  -3   -0.52    3.56
  -7   5   3   -1.06    3.32
   7   5  -3    1.33    2.57
  -6  -5   3    3.84    3.05
   6   5  -3   -2.13    2.34
  -6   5   3    1.69    3.39
   6  -5  -3    1.52    3.17
   5  -5  -3    5.07    4.37
   5   5  -3   -0.25    2.49
  -5  -5   3   -0.51    2.38
  -5   5   3    3.21    4.22
  -5  -5   3    0.08    2.81
   4   5  -3   -1.04    2.21
  -4  -5   3   -0.82    1.91
  -4   5   3    0.27    3.63
   4  -5  -3   -2.37    3.08
  -4  -5   3    0.93    2.84
  -3  -5   3   -0.92    2.47
  -3   5   3    3.05    3.20
  -3  -5   3    1.12    2.21
   3  -5  -3    3.18    3.69
   3   5  -3    1.89    2.59
  -2  -5   3    7.68    3.53
   2  -5  -3   13.94    5.07
  -2  -5   3    8.70    4.35
   2   5  -3    6.69    3.36
  -2   5   3    6.69    4.39
   1   5  -3    0.02    1.81
  -1  -5   3    0.79    2.64
  -1   5   3    1.43    2.78
  -1   5   3    0.76    1.98
   1  -5  -3    3.63    3.83
   0   5   3   11.42    4.33
   0  -5  -3   12.64    4.91
   0   5   3   13.74    4.00
   0   5  -3   14.95    5.06
   0  -5   3   13.17    4.26
   1   5   3   42.39    7.09
   1  -5   3   52.01    8.20
  -1  -5  -3   46.33    7.89
  -1   5  -3   37.31    8.43
   1   5   3   26.79    6.52
  -2   5  -3   12.32    5.12
  -2  -5  -3   21.04    5.11
   2  -5   3   29.31    6.79
   2   5   3   21.73    5.36
  -2  -5  -3   21.74    5.84
  -3  -5  -3    2.61    2.77
   3   5   3    0.60    2.65
  -3   5  -3   -0.93    2.68
   3  -5   3    0.81    3.15
  -3  -5  -3    3.14    2.86
   4  -5   3   13.90    4.88
  -4   5  -3    7.29    4.69
   4   5   3    5.60    3.91
  -4  -5  -3   12.38    4.41
  -4  -5  -3    7.49    3.83
   5   5   3   -0.52    2.62
  -5  -5  -3    3.33    2.91
  -5   5  -3    0.96    3.23
  -5  -5  -3   -0.12    2.18
   5  -5   3   -0.20    3.11
  -6  -5  -3   -0.98    2.49
   6  -5   3    3.84    3.75
  -6   5  -3   -4.22    2.31
   6   5   3   -2.44    2.46
  -6  -5  -3    1.48    2.72
   7  -5   3    1.39    3.19
  -7   5  -3    2.67    3.23
  -7  -5  -3    7.00    3.35
   7   5   3   -0.03    2.55
  -8  -5  -3   10.01    4.22
   8  -5   3   10.81    5.20
   8   5   3   20.35    6.15
  -8   5  -3    8.66    3.98
   4  -6  -3    2.26    3.43
  -4  -6   3    8.00    3.36
   3  -6  -3    3.20    3.18
   3   6  -3    6.34    3.42
  -3   6   3    2.77    4.37
  -3  -6   3    5.19    2.87
  -2  -6   3    3.37    2.92
  -2   6   3    9.17    5.27
   2  -6  -3    6.58    3.85
   2   6  -3    0.56    2.50
  -1   6   3   -0.48    3.25
   1   6  -3    6.88    3.70
  -1  -6   3   10.33    4.13
   1  -6  -3    6.91    4.12
   0   6  -3    2.48    3.22
   0  -6   3   -1.67    2.98
   0   6   3    3.77    3.42
   0  -6  -3   -3.07    2.71
  -1  -6  -3    3.71    3.69
  -1   6  -3   -3.68    2.32
   1  -6   3    4.87    3.64
   1   6   3    2.67    2.92
   2   6   3    5.86    3.57
  -2  -6  -3    7.09    4.11
  -2   6  -3    5.99    4.18
   2   6   3   -0.93    2.76
   2  -6   3    0.85    3.30
  -3  -6  -3    3.54    3.83
  -3   6  -3    3.73    3.93
  -3  -6  -3    3.89    3.61
   3  -6   3   -0.41    3.00
   3   6   3    1.84    3.18
 -15   0   4    7.46    4.38
  15   0  -4   -3.43   19.40
 -14   0   4    9.38    5.00
  14   0  -4    8.27   20.78
  13   0  -4   -2.09   16.83
 -13   0   4   -0.53    3.38
 -13   0   4    4.01    4.07
  12   0  -4   -3.20   13.75
 -12   0   4   -1.79    3.16
 -12   0   4    4.57    3.28
  11   0  -4   -7.63   11.20
 -11   0   4    0.29    2.35
 -11   0   4   -1.41    3.55
 -10   0   4  162.97   11.30
 -10   0   4  170.95   12.58
  10   0  -4  202.36   23.63
  -9   0   4    2.78    1.87
  -9   0   4   -0.15    3.45
   9   0  -4    4.84   10.99
   8   0  -4  356.74   34.12
  -8   0   4  361.98   17.94
  -8   0   4  372.75   18.36
   7   0  -4    0.21   12.14
  -7   0   4    0.82    1.29
  -7   0   4    1.63    2.79
  -6   0   4   91.69    6.68
  -6   0   4   88.28    6.13
  -5   0   4   -0.93    1.60
   5   0  -4    0.08    0.65
  -5   0   4    0.23    1.17
   5   0  -4    4.11    9.71
   4   0  -4  241.58   10.96
  -4   0   4  255.78   11.73
  -4   0   4  256.14   11.37
   3   0  -4   -0.16    1.82
  -3   0   4   -0.61    1.07
  -3   0   4    0.38    1.61
   3   0  -4   -1.81    6.15
  -2   0   4 1158.61   43.04
  -2   0   4 1110.30   41.01
   2   0  -4 1108.94   45.56
  -1   0   4   -3.39    5.98
   1   0  -4    0.86    1.20
  -1   0   4   -0.42    1.10
  -1   0   4   -0.52    0.44
  -1   0  -4    2.75    1.38
   1   0   4    0.12    0.98
  -1   0  -4    0.68    1.39
   1   0   4    8.41    8.42
  -2   0  -4 2091.16   79.47
   2   0   4 2225.22   81.72
  -2   0  -4 2143.60   89.24
   2   0   4 2303.19  138.35
  -3   0  -4    0.21    1.65
   3   0   4   -6.06   11.49
  -3   0  -4    0.56    1.33
   3   0   4    0.17    1.04
   4   0   4  599.93   47.24
  -4   0  -4  637.09   29.57
   4   0   4  623.96   25.19
  -4   0  -4  602.29   25.16
   5   0   4    0.56    1.07
  -5   0  -4    5.07    2.64
   5   0   4    7.09   15.13
  -5   0  -4    0.00    1.73
  -6   0  -4  627.28   26.37
   6   0   4  596.16   25.63
  -6   0  -4  582.03   29.55
   7   0   4   -0.39   14.05
   7   0   4    0.07    1.17
  -7   0  -4   -1.25    1.66
  -7   0  -4   -2.64    2.87
  -8   0  -4  385.37   21.38
   8   0   4  351.92   17.74
  -8   0  -4  364.10   19.04
  -9   0  -4    0.60    2.61
   9   0   4    0.21    1.39
   9   0   4    0.83   14.42
  -9   0  -4    0.97    4.21
 -10   0  -4   10.89    5.60
  10   0   4   -1.20   13.60
 -11   0  -4    3.79    4.25
  11   0   4   -0.76   14.09
 -12   0  -4    2.92    3.94
  12   0   4   -6.72   13.94
 -13   0  -4    1.58    3.86
  13   0   4    3.21   16.87
  14   0   4    2.85   15.01
 -14   0  -4    7.37    4.30
  15   1  -4   -4.37    4.28
  15  -1  -4  -11.53   17.08
  15   1  -4   -1.73   12.35
 -15   1   4    9.06    5.70
  14   1  -4   11.60    5.48
 -14   1   4    5.85    5.19
 -14  -1   4    6.34    3.96
  14   1  -4    6.99   15.87
  14  -1  -4   -8.32   15.97
 -13   1   4    3.08    5.31
  13  -1  -4   -3.94   18.57
 -13  -1   4   16.32    4.89
  13   1  -4   22.78    6.90
  13   1  -4   -5.08   14.75
  12  -1  -4   -9.33   19.99
  12   1  -4    8.82    5.53
  12   1  -4    0.94   16.29
 -12  -1   4    8.75    3.79
 -12   1   4    9.45    5.66
  11  -1  -4    2.02   17.79
 -11  -1   4   38.95    6.21
 -11   1   4   36.38    7.78
 -11   1   4   46.36    5.97
 -10  -1   4    4.99    2.98
  10  -1  -4   -1.97   15.59
  10   1  -4    3.81   10.83
 -10   1   4   -0.44    4.87
 -10   1   4   -1.48    1.76
 -10  -1   4   -2.49    2.51
   9   1  -4    3.05   16.21
   9  -1  -4   -9.73   10.62
  -9   1   4    2.03    1.71
  -9   1   4    6.43    5.24
  -9  -1   4    3.65    3.01
  -9  -1   4    3.37    2.36
  -8  -1   4  108.54    7.88
  -8  -1   4  101.29    8.18
  -8   1   4  101.82    7.19
   8  -1  -4  114.30    7.04
  -8   1   4  105.08    9.71
   7  -1  -4    3.78    1.64
   7  -1  -4    0.10    7.40
  -7  -1   4    3.71    2.00
  -7   1   4    2.11    3.38
  -7  -1   4    0.34    1.70
   7   1  -4    0.72   13.26
  -7   1   4    2.00    1.46
   6  -1  -4  181.88   11.05
  -6   1   4  166.11    9.11
  -6  -1   4  173.24   10.39
  -6   1   4  183.83   11.33
  -6  -1   4  174.78    9.53
  -5  -1   4  291.64   11.79
   5  -1  -4  267.14   14.89
  -5  -1   4  284.79   14.35
  -5   1   4  283.66   13.12
  -5  -1   4  300.74   13.34
  -5   1   4  285.95   14.63
  -4   1   4  511.67   20.70
  -4   1   4  508.54   21.35
   4  -1  -4  451.13   22.21
  -4  -1   4  486.39   19.95
  -4  -1   4  491.94   19.86
  -4  -1   4  459.73   21.02
  -3  -1   4  547.07   22.56
  -3  -1   4  554.98   21.97
  -3  -1   4  527.86   22.91
  -3   1   4  522.19   22.38
  -3   1   4  593.37   22.94
  -2   1   4  684.75   26.96
  -2   1   4  661.10   26.73
   2  -1  -4  622.97   28.69
  -2  -1   4  607.32   25.93
  -2  -1   4  695.16   27.51
  -2  -1   4  677.89   26.86
  -2  -1   4  722.48   44.57
  -1   1   4 1443.12   56.21
  -1  -1   4 1406.30   55.48
  -1  -1   4 1528.41   92.76
  -1  -1   4 1447.05   58.81
   1  -1  -4 1447.75   59.92
  -1   1   4 1504.96   55.02
  -1  -1   4 1539.20   54.83
   0   1   4  414.14   17.88
   0  -1  -4  410.89   16.25
   0  -1   4  407.30   17.97
   0   1  -4  424.23   17.83
   0  -1  -4  402.88   18.84
   0  -1   4  410.56   16.52
  -1   1  -4   79.16    5.40
   1   1   4   78.55    5.41
   1  -1   4   75.28    3.84
  -1  -1  -4   75.02    5.88
   1  -1   4   72.34    4.83
  -1  -1  -4   85.45    4.43
   2  -1   4  106.32    6.32
  -2  -1  -4  112.76    7.58
  -2  -1  -4  105.47    5.62
  -2   1  -4  101.80    6.76
   2   1   4  116.54    7.13
   3  -1   4   71.15    4.98
  -3  -1  -4   76.11    4.74
   3   1   4   73.14    5.73
  -3   1  -4   91.90    6.13
   3   1   4   65.57   10.72
  -3  -1  -4   80.58    6.32
  -4   1  -4  429.73   20.02
  -4  -1  -4  442.22   18.39
  -4  -1  -4  449.30   20.91
   4  -1   4  426.95   19.64
   4   1   4  445.59   20.43
  -5  -1  -4    4.29    2.09
  -5  -1  -4    5.09    2.91
   5   1   4    2.41    1.84
   5  -1   4    4.31    1.49
   5  -1   4    1.99   16.73
   5   1   4   -0.26   10.08
  -5   1  -4    7.44    2.73
  -6  -1  -4   84.84    6.34
  -6  -1  -4   81.37    7.05
  -6   1  -4   76.64    7.40
   6   1   4   78.09    6.69
   7  -1   4    7.19   14.40
   7   1   4    0.02   10.06
   7   1   4    3.43    2.11
  -7   1  -4    4.37    3.22
  -7  -1  -4    2.88    3.12
  -7   1  -4    2.23    2.76
  -7  -1  -4    1.28    2.37
   8   1   4   74.33    7.00
  -8   1  -4   46.58    8.06
  -8  -1  -4   68.81    6.70
  -8   1  -4   62.55    8.17
  -8  -1  -4   82.88    7.61
  -9   1  -4   45.98    8.06
   9  -1   4   16.93   16.80
  -9  -1  -4   47.37    6.42
  -9   1  -4   48.37    8.16
   9   1   4   46.89    6.35
 -10   1  -4    0.97    4.76
  10  -1   4    3.99   15.63
  10   1   4    1.26    8.64
  10   1   4    2.56    2.39
 -10  -1  -4   -0.08    3.08
 -11  -1  -4    2.55    2.89
  11   1   4   -1.40    2.58
  11   1   4    1.21    9.84
 -11   1  -4    2.07    4.83
  11  -1   4   -4.64   18.01
 -12   1  -4    1.92    4.83
  12  -1   4    4.74   19.14
  12   1   4   -5.46    9.47
 -12  -1  -4   -2.75    2.11
  13   1   4    5.63   10.79
 -13  -1  -4    0.65    2.44
  13  -1   4   19.90   22.71
 -13   1  -4   -2.69    4.05
 -14   1  -4    0.84    4.37
  14  -1   4    1.01   24.63
  14   1   4   -3.71   10.78
 -14  -1  -4   12.96    4.18
  14  -2  -4   10.98   25.11
  14   2  -4   10.12    5.90
  14   2  -4    8.27   12.97
 -14   2   4    8.65    5.73
 -14  -2   4   14.18    3.96
  13  -2  -4    6.58   22.20
  13   2  -4   -3.04   10.56
 -13   2   4    2.08    5.48
  13   2  -4    6.88    5.16
 -13  -2   4    6.79    3.43
  12   2  -4    0.59    3.60
  12  -2  -4    6.84   20.37
  12   2  -4   15.07   15.25
 -12   2   4   -2.17    4.87
 -12  -2   4    3.18    2.52
  11  -2  -4   52.95   23.86
 -11   2   4    0.83    4.80
  11   2  -4   -1.81    2.97
 -11  -2   4    0.11    1.96
  11   2  -4   -4.34    8.43
  10   2  -4   31.75    7.33
  10  -2  -4   21.16   19.08
 -10   2   4   29.28    7.32
 -10  -2   4   26.37    5.01
   9  -2  -4   23.30   18.45
  -9   2   4   55.75    8.47
   9  -2  -4   70.21    7.32
   9   2  -4   62.02    9.32
  -9  -2   4   60.54    6.87
   8   2  -4    6.63   15.71
   6  -2  -4    7.00   10.03
   5   2  -4  598.82   48.61
  -5   2   4  561.30   26.97
  -5  -2   4  589.57   25.64
   5  -2  -4  628.47   29.64
  -5  -2   4  554.79   26.85
  -5  -2   4  607.97   25.67
  -5   2   4  594.57   25.06
   4  -2  -4    0.41    1.78
   4   2  -4    8.05    7.75
  -3   2   4  255.80   12.61
  -3  -2   4  246.62   12.77
  -3   2   4  275.22   14.84
   3  -2  -4  256.84   14.76
  -3  -2   4  269.78   13.71
  -3  -2   4  223.76   12.88
  -2   2   4   83.50    7.11
  -2  -2   4   78.08    5.89
  -2   2   4   82.48    6.06
   2  -2  -4   76.27    6.68
  -2  -2   4  105.98    7.03
  -1   2   4  652.38   27.75
   1  -2  -4  644.25   29.58
  -1  -2   4  654.99   28.69
  -1  -2   4  596.86   27.14
  -1   2   4  683.72   28.76
   0  -2  -4  175.58   10.80
   0   2  -4  188.85    9.98
   0  -2   4  171.61   10.20
   0   2   4  178.06   10.41
   0  -2  -4  178.75    9.36
  -1  -2  -4  105.16    7.55
   1  -2   4  105.23    7.39
  -1   2  -4  110.45    8.46
  -1  -2  -4   99.10    6.51
  -1   2  -4  104.28    6.23
   1   2   4  105.36    7.64
   2   2   4   55.98    5.46
  -2  -2  -4   51.61    4.47
  -2  -2  -4   49.31    5.27
   2  -2   4   46.21    4.66
  -2   2  -4   60.29    6.12
   3   2   4   52.90    5.69
  -3   2  -4   61.53    6.37
  -3  -2  -4   54.50    4.63
  -3  -2  -4   56.75    5.60
   3  -2   4   66.04    5.56
  -4   2  -4    1.53    1.55
   4   2   4   -0.97    1.31
  -4  -2  -4   -1.26    0.88
  -4  -2  -4   -0.50    2.03
   4  -2   4    0.88    1.28
   4  -2   4  -10.24   17.35
   5  -2   4   77.67    6.50
  -5  -2  -4   78.33    6.02
  -5   2  -4   66.29    6.80
   5   2   4   66.20    6.83
  -5  -2  -4   70.14    6.47
   5  -2   4   20.74   24.00
  -6   2  -4    8.53    3.02
   6  -2   4    9.57    2.87
   6   2   4    2.08    9.27
   6  -2   4   -9.31   20.81
  -6  -2  -4   10.85    3.08
   6   2   4    9.28    3.52
  -6  -2  -4   19.08    3.85
   7  -2   4    1.96   23.12
   7   2   4    6.11   10.20
  -7  -2  -4    2.21    2.57
  -7  -2  -4   -1.25    1.74
   7  -2   4    0.34    1.47
   7   2   4    0.96    2.30
  -7   2  -4   -0.63    1.95
  -8   2  -4   12.47    4.70
   8   2   4   16.69    4.59
   8  -2   4   23.10    4.04
   8   2   4   -1.64    9.53
  -8  -2  -4   14.20    3.96
   8  -2   4    3.48   26.37
  -8  -2  -4   18.09    3.99
   9   2   4   -0.26   10.39
  -9   2  -4    4.84    4.33
   9  -2   4    0.80    1.81
   9  -2   4    4.63   25.58
   9   2   4   -0.88    2.29
  -9  -2  -4    3.09    2.55
  10  -2   4  103.13    8.04
 -10  -2  -4  111.59    8.93
  10   2   4  106.04   10.28
  10  -2   4   24.54   29.03
 -10   2  -4   84.61   10.75
 -11   2  -4    6.53    4.94
  11  -2   4    6.25   26.83
  11   2   4    4.79    3.95
 -11  -2  -4    4.89    2.53
  12  -2   4  -14.29   28.30
  12   2   4    0.99    3.35
 -12   2  -4    2.89    5.04
 -12  -2  -4    7.59    3.08
  13  -2   4   18.78   37.12
 -13   2  -4    5.43    5.82
 -13  -2  -4    9.26    3.59
  13   2   4    8.46    4.72
  13  -3  -4   28.41   28.30
 -13  -3   4    5.45    3.14
 -13   3   4    3.72    5.82
  13   3  -4    3.88    4.41
 -12   3   4    0.16    4.80
  12   3  -4    8.59    4.50
  12  -3  -4   16.02   21.76
 -12  -3   4    1.87    2.76
 -11   3   4    5.69    4.88
 -11  -3   4   12.28    4.21
  11  -3  -4   17.14   20.44
  11   3  -4    6.46    4.67
 -10   3   4    5.60    4.36
  10  -3  -4   11.19   18.48
  10   3  -4    1.36    3.16
 -10  -3   4    3.91    3.14
   9  -3  -4   20.02   18.41
  -9  -3   4    8.59    3.88
  -9   3   4    8.24    4.33
   9  -3  -4   15.97    6.05
   9   3  -4    6.89    4.68
   8  -3  -4  114.64   12.27
   8  -3  -4  142.66   17.95
  -8  -3   4  127.36   10.13
   8   3  -4  119.12   11.71
  -8   3   4   92.19   10.02
  -7   3   4   25.31    5.92
   7   3  -4   31.35    6.66
   7  -3  -4   11.87   10.44
   7  -3  -4   31.44    7.44
  -7  -3   4   23.71    5.17
   6  -3  -4    7.22    8.67
   6   3  -4   -0.59    2.02
  -6  -3   4   -1.39    1.11
  -6   3   4    0.11    2.08
  -6   3   4    0.72    1.45
   6  -3  -4   -1.86    2.23
  -6  -3   4   -2.89    1.49
  -5   3   4   14.42    3.06
   5  -3  -4    5.78    7.12
  -5  -3   4   14.54    2.92
  -5   3   4   18.43    5.03
   5  -3  -4   15.77    5.09
   5   3  -4   15.07    4.55
   5   3  -4   10.17   13.92
  -5  -3   4    7.94    3.08
  -4   3   4    2.25    1.80
   4   3  -4   -7.95    7.16
   4   3  -4   -0.61    1.89
  -4  -3   4    0.55    1.36
  -4   3   4   -0.48    1.78
  -4  -3   4    0.85    1.47
   4  -3  -4    2.88    2.58
   3   3  -4   65.99    9.62
   3   3  -4   54.08    6.85
  -3  -3   4   55.19    5.35
  -3  -3   4   62.15    6.32
  -3   3   4   59.04    8.22
   3  -3  -4   42.77    6.63
  -3   3   4   54.56    5.33
  -2   3   4   13.59    3.55
  -2  -3   4   10.59    3.41
  -2   3   4    9.53    3.80
   2   3  -4   16.01    3.85
   2  -3  -4   16.91    4.46
  -2  -3   4   10.68    3.03
   0   3  -4   14.13    3.08
   0   3  -4    7.44    2.98
   0  -3   4    8.88    2.91
   0  -3   4   28.60   15.40
   0  -3  -4   10.08    3.43
   0   3   4   12.66    3.58
   0  -3  -4   14.90    3.54
  -1  -3  -4  115.35    9.03
  -1   3  -4  104.51    9.85
   1   3   4  108.28    8.91
   1  -3   4   99.55   14.17
  -1   3  -4  103.57    7.14
   1  -3   4  124.61    9.32
  -1  -3  -4  109.41    7.91
  -2  -3  -4  209.09   13.15
  -2   3  -4  190.00   14.57
  -2   3  -4  201.98   10.39
   2   3   4  217.05   13.82
  -2  -3  -4  206.11   12.12
   2  -3   4  214.81   13.61
  -3   3  -4    3.79    2.78
  -3  -3  -4   10.89    2.97
   3  -3   4   11.23   12.73
  -3  -3  -4   10.87    3.28
   3   3   4    3.76    2.50
   3  -3   4    9.29    3.18
  -4  -3  -4   64.40    6.31
   4  -3   4   56.58    7.34
  -4  -3  -4   62.42    6.52
   4   3   4   66.08    8.11
  -4   3  -4   65.55    9.33
  -5  -3  -4    2.72    2.44
   5   3   4    5.64    3.55
  -5   3  -4    5.08    3.08
   5  -3   4   -4.61   16.64
  -5  -3  -4    9.87    3.21
   5  -3   4    8.80    3.14
   6  -3   4   44.08    7.00
   6   3   4   33.62    6.68
  -6  -3  -4   41.38    5.75
  -6   3  -4   37.06    7.14
  -6  -3  -4   42.96    6.21
   7  -3   4  202.22   14.09
   7   3   4  169.11   13.70
  -7  -3  -4  170.09   11.78
  -7  -3  -4  159.97   11.45
  -7   3  -4  150.75   12.93
   8  -3   4    9.90    4.41
  -8   3  -4    4.33    3.39
   8   3   4    6.21    3.63
  -8  -3  -4   11.14    3.90
   9   3   4    0.59    3.19
   9  -3   4   -0.52    2.40
  -9  -3  -4    4.22    2.58
  -9   3  -4    2.36    3.33
  10  -3   4    5.46    3.19
 -10   3  -4    0.42    3.96
 -10  -3  -4   -1.54    1.80
  10   3   4    0.88    3.11
  10  -3   4  -39.96   32.55
  11   3   4    5.87    3.89
 -11  -3  -4    4.11    2.72
  11  -3   4  -66.12   34.98
 -11   3  -4    2.91    4.53
  12  -3   4  -14.08   41.25
 -12  -3  -4    3.98    2.82
  12   3   4   16.08    5.48
 -12   3  -4   -1.22    4.59
  11  -4  -4    4.12   23.36
 -11   4   4   29.99    8.25
 -11  -4   4   63.70    9.73
  11   4  -4   57.74   11.20
  10  -4  -4    2.06    5.02
 -10   4   4    3.95    4.20
 -10  -4   4   10.72    4.48
  10   4  -4    3.41    3.60
   9   4  -4    4.79    3.25
   9  -4  -4    4.99    4.89
  -9   4   4    4.52    4.01
  -9  -4   4    4.57    2.76
  -8   4   4    1.61    3.22
   8  -4  -4    2.62    3.73
   8   4  -4    0.06    2.33
  -8  -4   4    0.86    2.60
  -7  -4   4    9.98    4.27
   7   4  -4   10.28    4.44
   7  -4  -4    7.91    4.54
  -7   4   4   12.00    5.03
  -6   4   4   30.11    7.77
  -6  -4   4   21.51    5.68
   6   4  -4   26.83    6.27
   6  -4  -4   32.23    7.74
   5   4  -4   13.80    4.45
  -5   4   4   18.38    6.44
  -5  -4   4   15.81    3.74
   5  -4  -4   14.86    5.68
  -5  -4   4   19.45    5.21
  -4   4   4   24.10    4.59
   4   4  -4   31.16    6.33
  -4  -4   4   39.33    7.21
  -4   4   4   37.86    8.59
  -4  -4   4   34.80    5.14
   4  -4  -4   37.19    7.77
  -3  -4   4   30.08    5.05
   3   4  -4   23.18    5.42
  -3   4   4   29.63    5.09
   3  -4  -4   30.79    6.76
  -3  -4   4   35.00    6.65
  -3   4   4   27.46    6.97
  -2   4   4    0.75    2.14
   2   4  -4   -1.82    1.61
  -2  -4   4    0.20    1.80
  -2   4   4    0.21    2.75
  -2  -4   4    0.89    2.26
   2  -4  -4    0.31    2.37
  -1   4   4   44.13    6.43
   1  -4  -4   35.31    6.89
  -1   4   4   34.30    7.14
  -1  -4   4   41.64    6.16
   1   4  -4   35.03    5.48
  -1  -4   4   39.36    7.03
   0  -4   4    3.55    2.66
   0   4   4    0.03    2.03
   0   4   4    6.70    3.18
   0   4  -4    2.21    2.00
   0  -4  -4    4.22    3.17
   0   4  -4    5.03    2.39
  -1  -4  -4   43.50    7.12
  -1   4  -4   43.99    8.17
   1  -4   4   38.77    6.64
   1   4   4   41.73    6.67
  -1  -4  -4   44.10    6.49
  -2  -4  -4    8.00    3.59
   2  -4   4   10.57    3.90
  -2   4  -4    8.83    3.95
   2   4   4    9.29    3.49
  -2  -4  -4    6.47    2.64
  -3  -4  -4   11.31    3.54
  -3   4  -4    5.62    3.70
   3   4   4    4.51    3.29
  -3  -4  -4    8.97    3.67
   3  -4   4   13.11    4.51
   4  -4   4   29.69    6.81
   4   4   4   30.50    6.53
  -4  -4  -4   31.56    5.91
  -4   4  -4   23.34    6.94
  -4  -4  -4   26.08    5.51
  -5  -4  -4    4.16    2.51
   5   4   4    4.86    3.32
  -5  -4  -4    4.02    2.25
   5  -4   4   19.67   24.02
   5  -4   4    3.43    3.42
  -5   4  -4   -0.92    3.11
   6   4   4   44.84    8.19
   6  -4   4   50.64    8.22
  -6  -4  -4   33.12    5.76
   6  -4   4   -3.22   25.91
  -6   4  -4   29.31    7.38
  -6  -4  -4   42.14    7.01
   7  -4   4    7.13   28.07
  -7  -4  -4    9.35    3.07
  -7   4  -4    9.65    4.48
   7  -4   4    7.64    4.62
   7   4   4    4.29    3.47
  -7  -4  -4   11.57    3.86
   8  -4   4   -1.35   29.37
  -8   4  -4    4.63    3.51
  -8  -4  -4    2.61    2.40
   8   4   4    3.25    3.38
   8  -4   4    9.68    4.55
  -9   4  -4    1.25    2.99
   9  -4   4    2.06    3.76
   9  -4   4   31.10   35.09
  -9  -4  -4    1.55    2.75
   9   4   4    8.44    4.79
  10   4   4   -4.77    3.05
 -10   4  -4   -5.26    2.79
  10  -4   4   40.18   38.14
  10  -4   4    4.65    4.36
 -10  -4  -4    1.07    2.56
   9  -5  -4    2.23    4.77
  -9   5   4    2.35    4.48
  -9  -5   4    0.89    3.63
   9   5  -4    3.00    3.06
   8   5  -4   -1.52    2.95
  -8   5   4    4.85    3.86
   8  -5  -4    1.61    3.90
  -8  -5   4    3.80    3.53
   7   5  -4   -0.22    2.40
  -7   5   4   -1.02    3.30
   7  -5  -4   -0.10    3.58
  -7  -5   4    1.31    3.03
   6   5  -4    2.65    3.28
  -6   5   4    6.93    4.91
  -6  -5   4   10.00    4.45
   6  -5  -4    9.79    5.03
   5   5  -4    3.02    2.57
  -5  -5   4   -3.10    1.87
  -5   5   4    0.15    3.94
   5  -5  -4   -2.07    3.51
  -5  -5   4    2.39    2.38
   4  -5  -4    4.26    4.07
   4   5  -4    2.22    2.49
  -4  -5   4    5.55    2.94
  -4   5   4    0.09    3.61
  -4  -5   4    2.21    2.73
  -3  -5   4    2.66    3.09
   3   5  -4    5.15    2.89
  -3   5   4    1.03    3.12
   3  -5  -4    1.43    3.50
  -3  -5   4   -0.38    1.84
  -2  -5   4   -0.40    2.27
   2  -5  -4   -2.43    2.93
   2   5  -4   -1.26    2.12
  -2   5   4    1.10    2.73
  -2   5   4   -1.71    1.90
  -2  -5   4   -0.24    1.76
  -1   5   4   17.96    5.63
   1  -5  -4   14.24    5.15
  -1  -5   4   17.82    5.00
   1   5  -4    9.11    4.19
  -1   5   4   17.60    4.46
   0   5  -4   29.20    7.07
   0  -5   4   35.63    6.76
   0   5   4   25.11    5.58
   0  -5  -4   32.91    7.21
   0   5   4   23.75    6.40
   1  -5   4    8.32    3.74
  -1  -5  -4   14.24    5.23
   1   5   4   11.93    3.92
   1   5   4    6.65    3.03
  -1   5  -4   10.36    4.75
  -2  -5  -4    4.26    2.66
  -2  -5  -4    6.50    3.86
  -2   5  -4    7.21    4.07
   2  -5   4   11.45    4.44
   2   5   4    6.13    3.36
  -3  -5  -4    7.91    3.50
   3  -5   4    8.12    3.97
  -3   5  -4    7.10    4.18
   3   5   4    6.37    4.31
  -3  -5  -4   13.78    5.00
   4   5   4   -0.46    2.99
  -4  -5  -4    3.37    3.14
   4  -5   4    2.75    3.23
  -4  -5  -4    5.94    2.97
  -4   5  -4    7.13    4.91
  -5   5  -4    6.15    4.62
  -5  -5  -4    3.24    2.81
  -5  -5  -4   -0.03    2.35
   5  -5   4   -0.21    3.01
   5   5   4   -2.69    2.65
  -6  -5  -4   -0.07    2.50
   6   5   4    1.35    2.91
  -6  -5  -4    0.07    2.25
   6  -5   4   -0.73    2.81
  -6   5  -4   -0.26    2.30
  -7   5  -4   -4.72    2.37
   7  -5   4   -0.12    3.10
  -7  -5  -4    5.00    3.18
   7   5   4   -1.96    2.83
   8   5   4    0.94    2.97
  -8  -5  -4    1.87    3.00
   8  -5   4   -2.00    3.60
  -8   5  -4    3.21    3.19
  -3  -6   4    2.31    2.72
   3   6  -4   -0.74    2.47
   3  -6  -4    2.77    3.93
  -3   6   4    6.39    4.65
   2   6  -4    8.40    4.22
  -2   6   4   12.72    5.69
  -2  -6   4   15.93    5.24
  -1  -6   4   10.09    4.05
   1   6  -4   11.27    4.64
  -1   6   4    9.74    4.96
   1  -6  -4    5.05    4.41
   0   6   4   -0.61    2.65
   0  -6  -4    2.64    3.65
   0   6  -4    6.31    3.44
   0  -6   4   -0.90    2.57
  -1   6  -4    3.26    3.06
   1  -6   4   -0.16    2.53
   1   6   4   -0.41    2.79
   1   6   4    0.22    2.46
  -1  -6  -4    0.61    3.63
   2  -6   4    4.77    3.22
  -2  -6  -4   -2.36    3.35
  -2   6  -4    3.70    3.53
   2   6   4    2.72    2.68
   2   6   4    0.95    2.77
 -15   0   5   14.50    4.92
  15   0  -5   16.00   21.64
 -14   0   5    4.64    4.27
  14   0  -5    6.73   19.90
 -13   0   5   23.59    5.88
  13   0  -5   55.44   27.47
 -13   0   5   16.87    6.08
 -12   0   5   -1.08    2.72
  12   0  -5   10.52   15.64
 -12   0   5    1.54    3.72
 -11   0   5    6.45    2.83
 -11   0   5    1.37    3.94
  11   0  -5    1.59   11.47
 -10   0   5    3.90    2.17
  10   0  -5    4.53   11.16
 -10   0   5    4.45    4.14
  -9   0   5    5.10    2.31
  -9   0   5    0.99    3.23
   9   0  -5    6.70    9.83
  -8   0   5   -0.05    1.47
   8   0  -5    0.56   15.10
  -8   0   5    1.05    3.25
  -7   0   5    8.29    3.41
   7   0  -5    1.88   13.52
  -7   0   5    8.96    2.48
  -6   0   5   -0.70    2.12
   6   0  -5    7.80   11.98
   5   0  -5  403.56   17.67
  -5   0   5  415.29   17.76
  -5   0   5  428.32   18.49
   4   0  -5   -3.58    7.11
  -4   0   5   -0.71    1.57
   4   0  -5    0.92    1.48
  -4   0   5    1.32    1.33
   3   0  -5  641.07   27.43
  -3   0   5  669.12   24.95
  -3   0   5  655.07   26.40
  -2   0   5    0.13    1.19
   2   0  -5    1.01    2.00
  -2   0   5    0.11    1.01
   2   0  -5    0.07    6.03
   0   0  -5   -0.82    1.55
   0   0   5    0.89    1.34
   0   0   5    0.48    4.26
  -1   0  -5  664.26   31.17
  -1   0  -5  706.81   25.94
   1   0   5  704.57   27.44
  -2   0  -5    2.27    1.74
   2   0   5    1.44    1.31
  -2   0  -5   -0.03    1.48
   2   0   5    1.33   10.81
  -3   0  -5 1318.75   55.64
   3   0   5 1291.31   49.30
  -3   0  -5 1290.04   48.12
   3   0   5 1229.19   85.58
   4   0   5   -0.19    1.06
  -4   0  -5    0.30    1.60
   4   0   5    2.12   13.45
  -4   0  -5    2.51    2.01
  -5   0  -5  671.77   30.39
  -5   0  -5  580.71   25.24
   5   0   5  484.93   46.89
   5   0   5  636.70   25.10
   6   0   5   -1.82   19.37
  -6   0  -5    1.79    2.66
  -6   0  -5   -0.51    1.76
   6   0   5   -0.45    1.08
   7   0   5    2.63   17.67
   7   0   5    1.06    1.37
  -7   0  -5    0.82    2.32
  -7   0  -5    0.60    3.22
   8   0   5   -7.35   18.59
  -8   0  -5   -0.81    3.67
   8   0   5   -1.59    1.32
  -8   0  -5    0.80    2.56
  -9   0  -5   -1.88    3.74
   9   0   5   -2.77   12.59
  -9   0  -5    2.66    3.36
   9   0   5    1.49    1.75
  10   0   5   -1.83   13.77
 -10   0  -5   -3.79    3.88
  11   0   5   12.00   16.30
 -11   0  -5    3.75    4.20
  12   0   5   10.95   15.78
 -12   0  -5   -5.30    3.40
 -13   0  -5   73.84   10.23
  13   0   5   29.72   19.76
 -14   0  -5    3.07    3.61
  14   0   5   20.28   19.23
 -15  -1   5    7.53    3.31
  15   1  -5    0.63   12.82
 -15   1   5    3.74    4.04
  15  -1  -5   -4.41   17.12
  15   1  -5    6.97    5.19
  14  -1  -5    8.11   19.89
 -14   1   5    0.47    4.34
  14   1  -5   -4.87   15.73
  14   1  -5    3.20    4.03
 -14  -1   5    5.77    3.69
  13   1  -5  -18.87   19.08
 -13  -1   5   11.25    4.51
  13  -1  -5    4.30   22.63
 -13   1   5    9.27    5.65
  12   1  -5   11.30   15.12
 -12  -1   5   28.41    6.41
 -12   1   5   19.63    6.41
 -12  -1   5   27.93    5.79
  12  -1  -5    5.42   20.36
  11   1  -5   11.70   14.75
 -11  -1   5    1.70    2.79
 -11  -1   5    2.79    2.98
 -11   1   5    1.69    2.37
  11  -1  -5   10.26   17.56
 -11   1   5    0.62    5.11
 -10  -1   5   32.90    5.51
  10   1  -5    5.58   15.30
 -10   1   5   34.02    5.10
 -10  -1   5   29.82    5.80
  10  -1  -5    1.78   14.43
 -10   1   5   27.07    6.76
   9   1  -5   -1.11   13.04
  -9  -1   5    5.68    3.06
  -9   1   5    4.79    5.01
  -9   1   5    1.75    1.69
  -9  -1   5    0.30    2.33
   9  -1  -5   -1.45   12.27
   8  -1  -5   14.10    2.86
  -8  -1   5   15.96    3.82
  -8   1   5   20.46    5.82
  -8   1   5   20.36    3.43
  -8  -1   5   17.86    3.74
   8   1  -5    0.84   13.91
  -7  -1   5   35.16    4.38
  -7   1   5   48.67    4.39
  -7   1   5   53.37    6.73
  -7  -1   5   45.89    5.65
   7  -1  -5   39.89    4.67
  -6   1   5   45.97    5.89
   6  -1  -5   33.00    4.59
   6   1  -5    8.59   13.80
  -6  -1   5   36.85    3.98
  -6   1   5   44.79    3.91
  -6  -1   5   34.99    4.72
  -5  -1   5  102.00    6.59
  -5   1   5  129.46    8.25
  -5  -1   5  112.17    7.57
   5  -1  -5  107.78    7.79
   5   1  -5  121.48    6.96
  -5   1   5  120.67    6.99
  -4   1   5    0.52    1.39
  -4  -1   5    0.00    1.40
   4   1  -5    3.34    7.96
   4  -1  -5    0.16    1.36
   4  -1  -5   -3.80    6.63
  -4  -1   5   -0.79    0.91
  -4   1   5    0.57    1.40
  -3  -1   5  246.33   12.37
   3  -1  -5  300.52   14.33
  -3   1   5  308.03   13.34
  -3  -1   5  263.46   13.12
  -3   1   5  283.24   13.15
  -3  -1   5  296.51   12.42
  -2  -1   5   89.56    5.24
  -2  -1   5   78.37    5.26
   2  -1  -5   81.64    6.28
  -2   1   5   82.41    5.33
  -2   1   5   83.54    5.54
  -2  -1   5   85.61    9.90
  -2  -1   5   83.53    4.78
  -1  -1   5   10.94    1.75
  -1  -1   5   12.10    2.01
  -1  -1   5    0.76    6.44
  -1   1   5    9.64    1.91
   1  -1  -5   -0.30    4.56
  -1   1   5   10.95    2.32
  -1  -1   5   12.77    2.18
   1  -1  -5    8.18    2.64
   0  -1   5   94.63    4.94
   0  -1   5   88.38    5.36
   0   1  -5   90.97    5.89
   0  -1  -5   87.48    4.61
   0   1   5   94.86    6.11
   0  -1  -5   82.23    6.47
   1  -1   5  248.55   11.66
   1   1   5  228.86   11.92
  -1  -1  -5  228.64   12.79
   1  -1   5  247.96   10.13
  -1  -1  -5  242.72   10.22
  -1   1  -5  240.44   11.77
  -2   1  -5  592.76   24.95
   2  -1   5  597.68   25.65
  -2  -1  -5  611.23   23.15
  -2  -1  -5  565.37   26.87
   2   1   5  614.06   25.55
  -3  -1  -5  364.90   14.70
   3   1   5  320.43   27.39
  -3   1  -5  343.18   16.15
   3  -1   5  354.58   16.13
  -3  -1  -5  339.52   17.42
   3   1   5  345.55   16.54
   4  -1   5  176.44    9.25
   4   1   5  170.64    9.98
  -4   1  -5  166.14    9.94
  -4  -1  -5  163.25   10.43
   4   1   5  120.74   16.87
  -4  -1  -5  176.89    8.65
  -5   1  -5   33.91    5.00
  -5  -1  -5   41.50    4.12
  -5  -1  -5   37.88    5.22
   5   1   5   30.79    4.44
  -5   1  -5   27.46    5.81
   5  -1   5   27.80   17.49
  -6   1  -5  136.57    9.97
   6   1   5  131.27    9.19
  -6  -1  -5  143.26    8.56
  -6  -1  -5  128.17    9.75
  -7  -1  -5    1.98    3.37
  -7   1  -5    2.93    3.15
   7  -1   5  -10.46   22.05
  -7   1  -5    1.36    2.66
  -7  -1  -5    1.38    2.43
   7   1   5    1.00   12.29
   7   1   5   -0.69    1.48
  -8   1  -5  127.38   13.22
   8   1   5  124.07    9.54
  -8   1  -5  134.54   11.18
  -8  -1  -5  130.42    9.37
  -8  -1  -5  145.13   11.00
   9   1   5   -1.26    1.83
   9   1   5    7.75   10.18
  -9   1  -5   -1.09    4.27
  -9  -1  -5   -0.08    3.07
  -9   1  -5    0.66    3.34
   9  -1   5   15.41   16.04
  10  -1   5   23.23   20.06
 -10   1  -5   -2.96    3.01
  10   1   5   -5.83    7.92
 -10  -1  -5    3.15    3.29
  10   1   5    1.70    2.62
 -10   1  -5   -4.23    4.23
 -11   1  -5   14.50    6.03
  11   1   5    9.83   11.06
  11  -1   5   12.35   21.35
  11   1   5   15.24    4.18
 -11  -1  -5   17.60    4.64
  12   1   5    2.33   10.58
  12  -1   5  -21.07   19.17
 -12  -1  -5   -0.23    2.33
 -12   1  -5   -2.93    4.53
  13  -1   5   -3.74   24.10
 -13   1  -5   -9.61    3.10
  13   1   5   12.81   13.04
 -13  -1  -5   -0.94    1.97
 -14  -1  -5    6.52    2.88
 -14   1  -5    0.64    4.51
  14  -1   5   -7.02   24.68
  14   1   5   -3.32   12.43
  14   2  -5   -2.46    3.35
  14   2  -5    3.59   12.81
 -14  -2   5    0.83    2.40
  14  -2  -5   38.36   27.70
 -14   2   5    1.25    5.47
  13   2  -5   -5.88   13.18
 -13   2   5   -0.87    4.57
  13  -2  -5   12.34   23.53
 -13  -2   5    5.40    2.92
  13   2  -5    2.17    4.99
  12  -2  -5   28.61   24.45
  12   2  -5    6.25    3.59
 -12  -2   5    1.22    2.09
 -12   2   5   -0.20    4.61
  12   2  -5   -0.87   10.09
  11  -2  -5   45.55   23.32
 -11  -2   5   44.87    6.45
  11   2  -5   69.20   10.92
 -10   2   5   14.93    6.05
 -10  -2   5   17.08    4.32
  10   2  -5    8.60   13.89
  10   2  -5   16.26    6.07
  -9   2   5    4.72    4.26
  -9   2   5    8.14    2.72
   9  -2  -5    7.27   17.21
  -9  -2   5    8.03    3.14
   9   2  -5   36.86   23.33
   8  -2  -5  228.49   15.40
  -8  -2   5  229.26   14.52
  -8   2   5  212.79   11.51
  -8   2   5  183.59   13.77
  -8  -2   5  216.71   12.91
   7  -2  -5  137.42   11.37
  -7   2   5   92.55    8.71
  -7  -2   5  115.49    8.32
  -7  -2   5  111.45    9.29
  -7   2   5  112.95    7.34
  -6  -2   5    4.86    2.29
   6  -2  -5    3.53    2.76
  -6   2   5    3.35    2.08
   6   2  -5   10.95   14.13
  -6  -2   5    7.49    3.23
   6  -2  -5   23.16   10.58
  -6  -2   5    2.48    1.13
  -6   2   5    5.57    2.52
  -5  -2   5  448.50   20.03
   5  -2  -5  509.59   24.24
  -5  -2   5  430.29   20.46
  -5   2   5  413.85   21.45
  -5  -2   5  445.95   21.94
  -5   2   5  453.53   20.29
  -4  -2   5  281.72   15.54
   4  -2  -5  330.96   17.52
  -4  -2   5  301.90   14.42
  -4   2   5  284.81   15.91
  -4   2   5  282.35   14.44
  -4  -2   5  332.23   15.60
   3  -2  -5    4.43    2.36
  -3  -2   5    5.15    1.71
   3  -2  -5   -1.64    4.96
   3   2  -5   -1.85    5.28
  -3   2   5    2.62    2.10
  -3  -2   5    6.81    2.33
  -3  -2   5    5.25    2.25
  -3   2   5    6.72    2.70
  -2  -2   5  114.01    7.51
   2  -2  -5  120.08    8.89
  -2   2   5  127.19    8.05
  -2  -2   5  135.69    8.50
  -2  -2   5  135.63    8.26
  -2   2   5  123.57    8.85
  -1  -2   5   48.61    4.68
  -1  -2   5   44.64    4.21
   1  -2  -5   45.99    5.19
  -1   2   5   43.06    4.68
  -1  -2   5   54.86    4.64
  -1   2   5   42.03    5.27
   0  -2   5   30.67    3.51
   0  -2  -5   33.35    4.62
   0   2   5   35.32    4.62
   0  -2   5   10.93   12.78
   0   2  -5   29.80    4.56
   0  -2   5   34.41    3.48
   0  -2  -5   32.36    3.25
  -1  -2  -5  298.97   14.00
   1   2   5  309.16   15.76
  -1  -2  -5  293.45   16.09
   1  -2   5  299.26   15.25
  -1   2  -5  310.10   16.66
   2  -2   5   -1.71   10.27
  -2   2  -5   22.66    4.55
  -2  -2  -5   15.79    3.74
   2   2   5   21.67    4.10
  -2  -2  -5   23.85    3.40
   2  -2   5   26.96    3.81
   3   2   5   29.95    4.82
   3  -2   5   36.23    4.56
  -3   2  -5   28.06    5.17
  -3  -2  -5   40.09    5.08
  -3  -2  -5   34.84    3.56
   3  -2   5    2.10   12.32
  -4  -2  -5  158.96   10.40
   4   2   5  151.57   10.72
   4  -2   5  158.90   10.13
  -4   2  -5  153.92   10.95
  -4  -2  -5  166.12    9.34
   5   2   5   55.31    6.07
  -5   2  -5   45.14    6.17
   5  -2   5   53.33    5.37
  -5  -2  -5   48.94    5.89
  -5  -2  -5   61.16    5.14
  -6  -2  -5   13.46    3.36
   6  -2   5   13.98   16.08
  -6   2  -5   12.21    3.71
   6   2   5   -0.53    9.19
  -6  -2  -5   10.87    3.73
   6   2   5   12.05    3.73
   6  -2   5   16.29    3.46
  -7   2  -5    5.88    3.38
  -7  -2  -5   11.01    3.13
  -7  -2  -5    9.75    3.86
   7   2   5   11.40    3.77
   7  -2   5    8.97    2.71
   7   2   5   -8.95   10.81
   8   2   5   -6.04   12.14
   8   2   5   11.38    3.70
   8  -2   5    7.93    2.79
  -8   2  -5    8.98    4.30
  -8  -2  -5    3.12    3.37
   8  -2   5  -16.63   25.97
  -8  -2  -5   10.77    3.43
  -9   2  -5    2.97    4.10
   9   2   5    6.34    3.34
   9   2   5    7.36   13.07
   9  -2   5   -8.69   30.33
   9  -2   5    1.84    2.16
  -9  -2  -5   -0.24    2.25
  10  -2   5   22.15   32.45
 -10   2  -5    3.99    4.92
  10   2   5    9.30    4.03
 -10  -2  -5    7.00    3.16
 -10   2  -5    2.24    3.94
 -11   2  -5    2.27    4.69
  11  -2   5   15.62   31.00
  11   2   5    4.27    3.17
 -11  -2  -5    2.16    2.32
  12  -2   5    2.09   34.60
 -12  -2  -5    3.12    2.40
 -12   2  -5   -0.39    4.93
  12   2   5   10.27    3.89
  13   2   5    5.49    3.67
  13  -2   5  -23.11   31.61
 -13  -2  -5   -0.87    2.30
 -13   2  -5    1.01    4.65
  13   3  -5    3.18    4.36
 -13   3   5   -4.95    4.37
 -13  -3   5    2.33    2.57
  13  -3  -5   -4.59   24.10
 -12  -3   5    3.03    3.22
  12   3  -5    6.25    4.84
  12  -3  -5   14.18   21.53
 -12   3   5   -5.85    4.57
 -11  -3   5    9.41    4.24
 -11   3   5    5.93    4.89
  11   3  -5    3.37    3.55
  11  -3  -5   30.89   19.82
 -10  -3   5    8.61    3.68
  10  -3  -5   29.58   18.39
  10   3  -5   12.19    5.34
 -10   3   5    7.16    4.81
  -9   3   5    8.29    4.20
   9  -3  -5   17.97    6.28
  -9  -3   5   11.62    3.99
   9   3  -5    7.98    4.76
   9  -3  -5   22.63   16.19
  -8  -3   5  209.13   13.82
   8  -3  -5  225.51   17.45
  -8   3   5  174.85   14.06
   8   3  -5  190.56   15.59
   7   3  -5   14.78    5.09
  -7   3   5   18.09    3.76
   7  -3  -5   20.52    6.19
  -7   3   5   22.10    5.52
  -7  -3   5   20.20    4.90
   7  -3  -5    3.56    9.56
   6  -3  -5   19.93   10.36
   6  -3  -5    4.55    3.82
  -6  -3   5   11.92    3.85
   6   3  -5    9.15    3.85
  -6   3   5    7.75    2.37
   6   3  -5   13.05   14.87
   6  -3  -5    4.68    3.82
  -6   3   5    7.16    3.23
  -5  -3   5    6.38    2.21
   5  -3  -5    2.05    7.65
  -5  -3   5    3.91    2.67
  -5   3   5    3.80    2.62
   5  -3  -5    5.36    3.42
   5   3  -5    7.14    3.33
  -5   3   5    3.60    2.26
   5   3  -5   -1.19    9.89
   4  -3  -5  123.38   10.35
  -4  -3   5  108.28    8.81
   4   3  -5   78.01    8.48
  -4   3   5   96.91    7.73
  -4   3   5   91.10    9.29
  -4  -3   5  103.31    7.52
   3   3  -5   12.33    3.62
   3   3  -5   -0.55    5.84
  -3   3   5   18.59    3.78
  -3  -3   5   15.67    3.37
   3  -3  -5    9.05    3.59
   3  -3  -5   -0.11    5.46
  -3   3   5   29.59    6.01
  -3  -3   5   14.37    3.79
   2  -3  -5  324.05   18.23
   2   3  -5  261.15   16.07
  -2   3   5  283.51   17.85
  -2  -3   5  267.59   15.99
  -2  -3   5  308.82   16.11
  -2   3   5  299.52   16.04
   1   3  -5   22.64    4.13
  -1  -3   5   21.82    3.94
  -1   3   5   24.54    4.51
  -1  -3   5   17.94   11.37
  -1   3   5   31.20    5.71
   1  -3  -5   24.01    4.87
  -1  -3   5   36.73    5.71
   0   3  -5   20.29    3.63
   0   3  -5   13.74    4.15
   0  -3   5   20.91    4.03
   0  -3  -5   21.94    4.52
   0  -3  -5   16.70    3.67
   0  -3   5   16.99   16.24
   0   3   5   20.75    4.36
   1  -3   5   44.39    5.28
   1   3   5   39.13    5.86
  -1  -3  -5   43.76    5.94
  -1   3  -5   48.06    7.43
  -1  -3  -5   42.69    5.17
  -1   3  -5   44.20    4.29
  -3   3  -5   14.85    5.01
  -3  -3  -5   18.82    3.96
   3  -3   5   17.08    4.01
  -3  -3  -5   26.66    4.99
   3  -3   5    5.17   13.66
   3   3   5   16.93    4.64
  -4  -3  -5   73.61    7.45
   4   3   5   80.33    8.18
  -4  -3  -5   77.67    7.04
   4  -3   5   88.35    8.01
  -4   3  -5   94.79    9.77
  -5  -3  -5    2.66    2.04
  -5   3  -5   -0.39    1.78
   5   3   5    0.58    2.48
   5  -3   5    1.22    1.94
  -5  -3  -5    2.11    2.55
   5  -3   5   12.57   17.80
   6   3   5    8.36    4.02
  -6  -3  -5   10.31    3.66
  -6   3  -5   15.54    4.67
   6  -3   5   17.29    4.76
  -6  -3  -5   13.69    3.77
   6  -3   5   -0.72   23.99
  -7  -3  -5   49.91    6.33
   7  -3   5   58.54   30.73
  -7   3  -5   40.91    7.60
   7  -3   5   44.45    7.24
  -7  -3  -5   46.23    6.45
   7   3   5   35.69    6.98
   8  -3   5   15.94    4.57
   8  -3   5   12.06   28.11
  -8   3  -5    7.83    3.71
   8   3   5    6.22    4.12
  -8  -3  -5   11.67    3.61
   9  -3   5    1.67    2.74
   9   3   5   -2.24    2.54
  -9  -3  -5    4.96    2.87
  -9   3  -5    1.69    3.62
   9  -3   5  -31.15   26.04
  10  -3   5  -12.83   32.77
  10   3   5    1.06    3.22
  10  -3   5    3.56    2.98
 -10  -3  -5    2.13    2.37
 -10   3  -5    2.17    4.13
  11  -3   5  -30.39   29.08
 -11   3  -5   -2.33    3.18
  11   3   5    0.89    3.23
  11  -3   5   -2.86    2.43
 -11  -3  -5    3.93    2.75
  12   3   5    6.25    4.38
 -12  -3  -5    3.73    2.78
 -12   3  -5    3.34    4.86
 -11  -4   5    4.31    3.35
  11   4  -5   -0.12    2.85
 -11   4   5    1.88    5.09
 -10  -4   5   -1.45    2.66
 -10   4   5    1.73    3.74
  10   4  -5   -1.62    2.46
   9   4  -5    1.18    3.23
  -9  -4   5    1.34    2.79
   9  -4  -5   10.31    5.37
  -9   4   5    0.96    3.11
  -8   4   5    4.56    3.53
  -8  -4   5    1.73    3.11
   8  -4  -5    5.86    4.86
   8   4  -5    2.04    3.46
   7  -4  -5   -7.23    2.61
   7   4  -5    0.53    2.32
  -7   4   5    3.89    2.98
  -7  -4   5   -0.48    2.59
   6   4  -5    0.58    2.50
  -6  -4   5    1.17    2.55
  -6   4   5    2.91    2.83
   6  -4  -5   -1.08    3.04
   5  -4  -5   15.88    5.41
  -5  -4   5   13.17    4.44
  -5   4   5    4.90    4.33
   5   4  -5   10.61    4.24
  -5  -4   5    7.90    2.92
   4  -4  -5   10.26    4.63
  -4   4   5   21.47    4.53
  -4  -4   5   15.11    3.81
   4   4  -5   18.09    4.89
  -4  -4   5   17.37    4.89
  -4   4   5   12.10    4.75
  -3   4   5  133.98   12.96
   3   4  -5  111.42   10.45
  -3  -4   5  138.69   11.35
   3  -4  -5  148.38   12.85
  -3   4   5  144.02   10.41
  -3  -4   5  125.28    9.94
  -2   4   5    8.61    3.30
  -2  -4   5    7.59    2.84
   2   4  -5    7.71    3.30
  -2   4   5    3.88    3.45
  -2  -4   5    8.59    3.85
   2  -4  -5   15.09    4.98
   1   4  -5    0.04    1.59
  -1   4   5    1.16    2.53
  -1   4   5    3.06    2.35
   1  -4  -5   -0.03    2.20
  -1  -4   5    2.08    2.05
   0   4  -5   88.23    9.62
   0  -4  -5   98.89    9.70
   0   4  -5   93.47    7.86
   0   4   5   84.05    8.87
   0  -4   5   96.58    8.77
   0   4   5  100.05    9.15
   1   4   5    5.20    2.63
   1  -4   5    0.85    2.02
  -1  -4  -5   -2.65    1.32
  -1  -4  -5    2.24    2.63
  -1   4  -5   -0.18    2.27
  -2   4  -5    1.95    2.64
  -2  -4  -5    2.13    2.14
   2   4   5    0.34    2.55
  -2  -4  -5    0.68    2.14
   2  -4   5    0.61    2.09
   3  -4   5   35.14    6.62
  -3   4  -5   22.20    6.43
   3   4   5   24.95    6.08
  -3  -4  -5   34.12    5.83
  -3  -4  -5   26.00    5.77
  -4  -4  -5   42.33    6.59
   4  -4   5   44.53    7.50
  -4  -4  -5   35.65    6.22
  -4   4  -5   29.95    7.85
   4   4   5   44.64    7.91
  -5  -4  -5   44.44    7.09
  -5   4  -5   48.89    9.97
   5   4   5   52.98    8.57
   5  -4   5   57.09    8.48
   5  -4   5   23.91   26.54
  -5  -4  -5   51.39    7.09
  -6   4  -5   10.95    4.49
  -6  -4  -5    4.61    2.84
  -6  -4  -5    7.49    3.37
   6  -4   5    3.21    3.59
   6  -4   5   39.54   28.18
   6   4   5    1.01    2.77
  -7  -4  -5   -2.43    1.71
   7  -4   5    3.13    3.22
   7  -4   5    3.74   25.95
  -7   4  -5   -0.76    2.69
  -7  -4  -5   -1.76    1.61
   7   4   5   -0.75    2.57
  -8   4  -5    2.16    2.79
  -8  -4  -5    1.81    2.30
   8   4   5    2.28    3.32
   8  -4   5   -2.46   28.69
   8  -4   5   -1.50    2.97
  -9   4  -5   -1.95    2.15
   9  -4   5    1.79    3.58
   9   4   5    2.94    3.63
   9  -4   5   16.74   32.31
  -9  -4  -5    4.93    2.99
  10  -4   5   -5.00    2.81
 -10   4  -5   -0.07    3.59
 -10  -4  -5    2.05    2.70
  10   4   5   -1.28    3.15
  10  -4   5   27.48   34.52
   9  -5  -5    0.09    4.62
   8   5  -5   11.33    4.88
  -8  -5   5   17.10    5.58
  -8   5   5    6.49    4.36
   8  -5  -5   14.56    6.20
  -7   5   5   -6.07    2.85
  -7  -5   5   -0.96    3.17
   7   5  -5   -1.87    2.64
   7  -5  -5   -1.25    3.20
   6   5  -5    1.48    2.84
   6  -5  -5    0.79    3.48
  -6  -5   5    0.83    3.20
  -6   5   5    2.32    3.77
  -5  -5   5    1.56    3.18
   5  -5  -5   -2.74    3.18
  -5   5   5    3.60    4.20
   5   5  -5    0.06    2.45
  -4   5   5    6.15    5.01
   4  -5  -5    8.28    5.09
   4   5  -5    4.01    2.97
  -4  -5   5   12.30    3.91
  -4  -5   5    5.40    3.72
   3   5  -5   14.16    4.21
   3  -5  -5   22.54    6.77
  -3  -5   5   16.01    5.22
  -3  -5   5   19.87    4.94
  -3   5   5   26.32    7.72
  -2   5   5    2.46    2.98
  -2  -5   5    1.26    2.16
  -2   5   5   -2.39    1.82
   2  -5  -5   -4.24    2.59
   1   5  -5    1.36    2.20
  -1  -5   5    0.54    2.07
   1  -5  -5    2.20    3.13
  -1   5   5    0.31    2.16
  -1   5   5    0.35    2.77
   0   5   5    1.29    2.82
   0   5  -5    2.46    2.60
   0   5   5    2.15    2.82
   0  -5   5    0.57    2.03
   0  -5  -5    3.08    3.48
   1   5   5    2.92    3.04
  -1   5  -5   12.31    4.80
   1   5   5   10.90    3.74
  -1  -5  -5   14.25    4.81
   1  -5   5   11.41    4.28
  -2  -5  -5   77.51    8.84
  -2  -5  -5   58.39    8.39
   2   5   5   57.83    8.95
  -2   5  -5   65.39   11.43
   2  -5   5   51.33    8.20
   3   5   5    1.73    3.00
  -3  -5  -5   15.23    4.72
   3  -5   5   10.04    4.53
  -3  -5  -5    4.70    3.03
  -3   5  -5    5.48    4.42
   4  -5   5    3.91    3.03
  -4  -5  -5    2.44    2.63
  -4  -5  -5    0.84    2.69
  -4   5  -5    0.00    2.96
   4   5   5    1.34    2.93
   5   5   5    1.47    3.12
  -5  -5  -5    4.45    3.10
   5  -5   5   -2.66    2.48
  -5  -5  -5    2.17    2.45
  -5   5  -5    5.95    3.95
  -6  -5  -5   12.59    4.24
   6  -5   5    9.51    4.23
   6   5   5   15.85    5.46
  -6   5  -5    2.18    3.07
  -6  -5  -5    3.38    3.44
  -7   5  -5   -1.23    2.85
   7  -5   5    2.12    3.00
  -7  -5  -5    1.66    2.45
   7   5   5    3.14    3.47
   3  -6  -5   -0.89    3.61
  -3  -6   5    3.79    2.58
  -2  -6   5    7.45    3.15
  -2   6   5    6.83    5.00
   2  -6  -5    7.98    4.75
   2   6  -5    5.65    3.19
  -1   6   5    9.64    5.27
  -1  -6   5    5.41    3.32
   1   6  -5   10.77    4.44
   1  -6  -5   12.18    5.36
   0  -6  -5    3.39    3.64
   0  -6   5   -0.15    2.85
   0   6  -5    4.75    3.29
   0   6   5   -2.74    2.35
  -1   6  -5    0.11    2.61
   1   6   5   -0.55    2.69
   1  -6   5    3.04    2.57
  -1  -6  -5   -0.49    3.09
   1   6   5   -0.37    2.48
   2  -6   5    0.58    2.85
  -2  -6  -5    8.40    4.40
 -15   0   6    8.82    4.02
  15   0  -6  -15.04   19.52
 -14   0   6   14.52    5.42
  14   0  -6   52.05   29.15
 -14   0   6   24.10    6.14
 -13   0   6    5.40    3.48
 -13   0   6    5.55    4.01
  13   0  -6   -4.03   14.67
 -12   0   6    9.52    4.74
  12   0  -6   25.70   17.53
 -12   0   6    9.16    3.68
 -11   0   6    1.00    3.89
 -11   0   6    2.05    2.64
  11   0  -6    5.76   13.08
 -10   0   6   13.38    3.87
 -10   0   6   10.59    4.93
  10   0  -6   14.03   12.40
  -9   0   6    1.16    3.64
  -9   0   6    0.56    1.88
   9   0  -6    8.20   12.38
  -8   0   6   64.71    5.81
  -8   0   6   67.29    6.57
   8   0  -6   35.28   21.22
   7   0  -6    2.90   14.10
  -7   0   6    1.41    1.63
  -7   0   6    2.25    2.71
  -6   0   6  100.70    6.99
  -6   0   6  107.45    7.08
   6   0  -6  107.76    5.94
   5   0  -6   -0.06   10.08
  -5   0   6   -0.74    1.57
  -5   0   6   -1.38    1.14
   5   0  -6   -0.28    1.50
  -4   0   6    0.86    1.51
   4   0  -6    0.31    1.80
   4   0  -6   -0.34    7.02
  -4   0   6   -0.99    1.12
   3   0  -6   -0.89    4.87
   3   0  -6    2.48    2.13
  -3   0   6   -0.23    1.20
  -3   0   6    0.39    1.12
  -2   0   6 2259.97   78.29
   2   0  -6 2221.19   88.02
  -2   0   6 2057.98   82.22
   1   0  -6    0.00    1.68
  -1   0   6   -2.63    7.13
  -1   0   6   -0.90    1.48
   0   0   6 2587.37   96.47
   0   0  -6 2571.68  104.52
  -1   0  -6    1.27    1.26
   1   0   6   -0.84    1.11
   1   0   6   -5.20    8.10
  -1   0  -6    1.64    1.78
  -2   0  -6  171.61   11.55
  -2   0  -6  184.57    8.31
   2   0   6  162.84    8.74
   3   0   6    0.20   11.53
  -3   0  -6    1.75    1.71
  -3   0  -6    1.63    1.78
   3   0   6    1.14    1.26
  -4   0  -6   44.59    4.59
  -4   0  -6   40.97    5.97
   4   0   6   39.14    3.64
   4   0   6   41.08   17.61
   5   0   6   -0.35    1.13
   5   0   6   -2.48   12.33
  -5   0  -6   -1.62    1.67
  -5   0  -6   -1.68    2.11
  -6   0  -6  182.22   10.89
   6   0   6  164.34    9.59
  -6   0  -6  187.07   13.44
  -7   0  -6    0.82    3.39
  -7   0  -6   -0.19    2.24
   7   0   6    0.79    1.33
   7   0   6  -27.09   16.96
   8   0   6    7.64    2.59
   8   0   6   12.78   18.30
  -8   0  -6    6.46    4.40
  -8   0  -6    6.90    4.16
  -9   0  -6   -2.49    3.29
  -9   0  -6    2.52    3.67
   9   0   6   12.68   17.75
  10   0   6    3.01   16.30
 -10   0  -6   26.20    6.38
 -11   0  -6    4.16    4.00
  11   0   6    7.19   17.62
 -12   0  -6   64.34    9.12
  12   0   6   10.82   17.94
  13   0   6   21.80   19.83
 -13   0  -6    3.95    3.93
 -14   0  -6   35.85    7.19
  15  -1  -6    4.96   19.01
 -15  -1   6    5.34    3.02
  15   1  -6   25.97   19.00
 -15   1   6    4.72    4.53
  15   1  -6    4.72    4.69
  14   1  -6   13.69   22.54
 -14   1   6   24.01    6.94
  14  -1  -6   27.50   25.69
 -14  -1   6   18.91    5.04
 -13   1   6   14.11    5.87
 -13  -1   6   20.31    5.17
  13  -1  -6   10.79   20.82
 -13  -1   6    9.07    4.14
  13   1  -6    2.87   14.70
 -12  -1   6   17.72    5.38
 -12   1   6    9.56    5.79
 -12   1   6   13.46    3.90
 -12  -1   6   15.95    4.53
  12  -1  -6    8.50   18.16
  12   1  -6   10.60   14.98
  11  -1  -6    5.78   16.54
 -11   1   6   36.58    7.66
 -11  -1   6   40.72    6.90
  11   1  -6   18.09   18.49
 -11   1   6   45.67    6.37
 -11  -1   6   37.48    6.11
  10   1  -6   11.01   13.99
 -10  -1   6    2.27    2.78
 -10  -1   6    1.92    2.86
 -10   1   6   -0.29    2.00
 -10   1   6   -0.15    5.00
  10  -1  -6   10.46   15.83
  -9   1   6   42.97    4.73
  -9   1   6   54.53    8.09
  -9  -1   6   52.55    6.83
  -9  -1   6   43.43    5.69
  -8   1   6    4.07    4.08
  -8   1   6    4.81    2.07
   8   1  -6    1.64   14.29
  -8  -1   6    7.18    2.75
   8  -1  -6    3.34   10.67
  -8  -1   6    4.49    2.45
   7   1  -6    4.32   13.20
   7  -1  -6   -0.29   11.68
  -7   1   6    0.28    1.35
  -7   1   6    0.61    3.44
  -7  -1   6    1.96    1.96
  -7  -1   6    1.78    1.85
   7  -1  -6    2.83    2.04
  -6   1   6  343.28   15.98
  -6  -1   6  344.27   17.21
  -6   1   6  359.85   17.40
   6  -1  -6  343.95   17.69
  -6  -1   6  323.88   15.49
   5   1  -6   -0.31    8.93
   5   1  -6    8.35    1.94
  -5  -1   6    4.69    1.79
   5  -1  -6    1.41    9.25
  -5   1   6    5.99    2.67
   5  -1  -6    6.15    2.25
  -5   1   6    6.07    2.26
  -5  -1   6    5.29    2.25
   4   1  -6   -1.28    6.97
  -4  -1   6    0.86    1.46
   4  -1  -6    0.49    8.27
  -4   1   6    1.11    1.67
  -4  -1   6    1.52    1.16
   4   1  -6    4.36    1.98
  -4   1   6    4.28    1.86
   4  -1  -6    2.52    1.84
   3   1  -6   31.97    4.72
  -3   1   6   42.04    3.63
  -3  -1   6   33.93    3.56
  -3  -1   6   33.47    3.11
  -3   1   6   35.41    3.65
   3  -1  -6   36.95    4.45
  -2   1   6  181.39    8.56
  -2  -1   6  174.06    8.81
   2  -1  -6  165.48    9.89
  -2  -1   6  150.56   15.54
  -2   1   6  165.92    9.11
  -1  -1   6   14.90    2.27
  -1  -1   6   14.58    2.07
  -1   1   6   11.43    1.90
  -1   1   6   13.35    2.66
  -1   1   6   -0.28    5.17
  -1  -1   6    2.40    6.78
  -1  -1   6    6.59    1.73
   1  -1  -6   13.88    3.39
   0   1   6  329.36   15.06
   0  -1   6  308.28   13.41
   0  -1  -6  303.40   16.13
   0   1  -6  312.09   14.40
   0  -1   6  309.82   14.51
   0  -1  -6  325.35   12.71
  -1   1  -6   39.64    3.80
  -1  -1  -6   48.33    5.57
  -1  -1  -6   42.90    2.92
   1   1   6   49.69    4.45
   1  -1   6   47.89    3.13
   1  -1   6   40.92    3.59
   2  -1   6   87.97    4.84
  -3  -1  -6  287.78   15.98
   3   1   6  308.46   15.04
  -3   1  -6  290.90   14.53
  -3  -1  -6  304.97   12.99
  -4   1  -6   12.04    4.69
  -4   1  -6   14.96    3.39
   4   1   6    7.64   11.27
   4   1   6   16.32    3.38
  -4  -1  -6   16.02    2.76
  -4  -1  -6   17.26    4.07
   4  -1   6   -1.67    7.93
  -5  -1  -6  120.41    7.36
  -5   1  -6  102.36   11.33
  -5   1  -6  119.99    8.70
   5   1   6  116.49    8.19
  -5  -1  -6  119.86    9.27
  -6  -1  -6   37.81    6.01
   6   1   6    5.20   12.98
  -6   1  -6   37.82    5.79
   6   1   6   47.25    5.02
  -6   1  -6   35.86    7.48
  -6  -1  -6   42.04    4.87
  -7   1  -6   35.60    7.76
  -7   1  -6   44.79    6.82
   7   1   6   38.90    5.33
   7  -1   6   10.70   19.57
  -7  -1  -6   49.49    6.99
  -7  -1  -6   47.56    5.59
   8  -1   6   41.59   20.41
  -8   1  -6   32.33    6.72
  -8  -1  -6   36.88    5.34
   8   1   6   31.63    5.06
  -8  -1  -6   42.84    7.10
  -8   1  -6   37.70    8.58
  -9   1  -6    0.61    3.38
   9   1   6    2.25    2.36
  -9  -1  -6    0.44    2.77
  -9  -1  -6    2.71    4.74
   9  -1   6   19.16   21.12
  -9   1  -6    5.60    4.76
   9   1   6   11.13   11.97
  10   1   6  119.55    9.74
 -10  -1  -6  130.82    9.71
 -10   1  -6   93.77   10.58
 -10   1  -6  115.83   13.12
  11   1   6   13.25   13.24
 -11   1  -6   18.35    6.27
  11  -1   6    4.89   23.20
 -11  -1  -6   16.89    4.53
  12  -1   6   50.64   28.88
 -12   1  -6   11.82    6.11
 -12  -1  -6   21.55    5.27
  12   1   6   19.14   14.64
  13  -1   6   55.62   27.93
  13   1   6   24.50   16.47
 -14  -2   6    7.00    3.15
  14   2  -6   -2.66   16.86
  14   2  -6    9.30    6.11
 -14   2   6    2.29    5.60
  14  -2  -6    4.39   24.95
 -13  -2   6   12.50    3.99
  13   2  -6    1.08   12.15
  13   2  -6   15.54    5.61
  13  -2  -6   15.82   24.91
 -13   2   6    1.70    5.50
  12   2  -6   -7.53   10.57
 -12  -2   6   19.83    4.90
 -12   2   6    2.74    6.00
  12  -2  -6   18.82   24.34
  12   2  -6   13.54    5.32
  11   2  -6   46.73   25.74
 -11   2   6   20.09    6.89
 -11  -2   6   31.76    5.71
  11  -2  -6   53.73   27.38
  10   2  -6   17.38   16.65
 -10   2   6   59.81    9.08
  10  -2  -6    3.43   14.93
   9   2  -6   11.40   19.63
   9  -2  -6    7.89   14.47
  -9  -2   6   -2.48    2.34
  -9  -2   6   -0.33    2.07
  -9   2   6    3.81    2.04
  -9   2   6    1.68    4.12
   8  -2  -6   12.20   11.37
  -7   2   6   11.19    2.62
  -7  -2   6    8.44    3.33
   7  -2  -6   13.52    4.51
  -7   2   6    9.10    3.57
  -7  -2   6    8.38    2.79
   7  -2  -6   -2.50    6.76
  -6   2   6  261.42   15.49
  -6  -2   6  246.43   14.48
   6  -2  -6  285.50   17.40
  -6  -2   6  297.65   13.35
  -6   2   6  327.37   15.34
  -6  -2   6  281.50   16.11
  -5  -2   6  185.61   11.58
  -5   2   6  168.59   11.06
   5  -2  -6  200.79   12.87
  -5   2   6  183.87   10.52
  -5  -2   6  176.35    9.48
  -5  -2   6  187.57   10.93
   4  -2  -6    1.02    5.79
   4   2  -6    5.05    7.60
  -4  -2   6   -0.50    1.15
  -4   2   6   -1.83    1.15
  -4   2   6    0.24    1.17
  -4  -2   6   -0.47    0.84
   4  -2  -6   -1.04    1.67
  -4  -2   6    0.84    1.86
  -3  -2   6  208.62   11.20
   3  -2  -6  205.07   13.02
  -3   2   6  229.73   12.99
  -3  -2   6  227.18   12.31
  -3   2   6  234.10   12.28
  -3  -2   6  208.76   11.92
  -2  -2   6    6.46    9.89
  -2  -2   6    3.48    1.59
  -2   2   6    4.69    1.90
  -2   2   6    3.86    2.05
   2  -2  -6   -3.99    5.78
  -2  -2   6    3.40    2.00
   2  -2  -6    2.45    2.19
  -2  -2   6    3.62    1.93
  -1  -2   6   89.57    6.62
  -1  -2   6   80.02    5.88
   1  -2  -6   73.83    7.03
  -1  -2   6   79.85    5.82
  -1   2   6   85.85    6.84
  -1   2   6   76.97    6.58
   0  -2  -6 1563.46   62.58
   0   2   6 1444.28   58.87
   0  -2   6 1588.34   56.95
   0  -2   6 1450.27   60.90
   0   2  -6 1393.26   58.31
   0  -2  -6 1401.20   55.41
  -1   2  -6   -0.65    1.17
   1  -2   6   -0.20    0.97
   1  -2   6    0.64    1.20
   1  -2   6   20.32   14.46
  -1  -2  -6    1.94    2.24
   1   2   6    1.63    1.87
  -1  -2  -6    0.49    1.03
  -2  -2  -6  228.63   13.31
   2  -2   6  220.75   12.40
   2   2   6  211.34   12.76
  -2   2  -6  219.04   13.51
  -2  -2  -6  217.43   11.20
   3  -2   6   96.93    7.26
   3   2   6   97.43    7.96
  -3  -2  -6   96.91    7.95
  -3  -2  -6   80.79    6.03
  -3   2  -6  103.10    8.46
  -4  -2  -6    4.19    3.15
   4   2   6    1.53    2.03
   4  -2   6   -2.64   11.08
  -4  -2  -6    3.24    1.75
   4  -2   6    2.54    1.65
  -4   2  -6    6.06    2.59
  -5  -2  -6  159.83    9.49
   5   2   6  151.13   10.94
  -5  -2  -6  158.84   11.09
   5  -2   6  174.67   10.65
  -5   2  -6  137.50   10.50
   6   2   6    2.56   10.08
   6  -2   6   -1.57   10.72
   6  -2   6    5.89    2.29
  -6  -2  -6    2.60    1.92
   6   2   6    4.59    2.40
  -6  -2  -6    1.42    3.31
  -6   2  -6    3.83    2.38
  -7  -2  -6   13.66    3.56
  -7   2  -6   12.74    4.17
   7   2   6   13.00    4.04
   7  -2   6   15.09    3.66
   7   2   6    3.70   10.90
   7  -2   6   -6.60   13.58
  -7  -2  -6   16.90    4.59
  -8   2  -6   26.10    6.16
   8   2   6   -0.46   12.43
   8  -2   6  -12.44   18.00
   8  -2   6   44.31    5.09
  -8  -2  -6   45.86    5.84
   8   2   6   41.99    6.67
  -8  -2  -6   47.22    6.69
  -9   2  -6   -1.95    3.32
   9   2   6    0.96    2.42
  -9   2  -6    3.60    4.97
   9   2   6   -4.90   11.60
  -9  -2  -6   -0.47    2.06
   9  -2   6  -15.41   20.64
  10   2   6    1.63    2.65
 -10  -2  -6    3.03    2.28
  10  -2   6  -28.67   22.17
 -10   2  -6    3.46    4.16
 -10   2  -6    0.53    3.90
 -11  -2  -6    2.45    2.46
 -11   2  -6   -2.74    4.11
  11   2   6    4.45    3.23
  11  -2   6  -27.97   27.66
  12   2   6    7.36    3.76
 -12  -2  -6    4.24    2.54
 -12   2  -6    4.80    5.93
  12  -2   6  -30.52   29.24
  13  -2   6  -33.61   24.34
 -13   2  -6  -10.37    3.64
 -13  -2  -6    3.88    2.27
  13   3  -6    7.34    4.50
  13  -3  -6   11.82   23.03
 -13  -3   6    6.26    3.50
 -13   3   6   -7.32    4.48
  12  -3  -6   14.63   20.56
 -12   3   6    3.16    5.51
 -12  -3   6    3.65    3.20
  12   3  -6    4.69    3.81
  11  -3  -6   17.90   16.60
 -11  -3   6   10.46    4.04
 -11   3   6   10.79    5.63
  11   3  -6    1.08    3.28
  10   3  -6   45.03    9.20
 -10   3   6   34.51    7.54
  10  -3  -6    2.18   13.97
 -10  -3   6   44.15    6.98
  -9  -3   6   62.72    7.97
   9  -3  -6   66.99    9.85
  -9   3   6   57.61    8.79
   9   3  -6   62.08    9.77
   8  -3  -6   -0.04   11.98
   8  -3  -6   -2.11    2.88
  -8  -3   6    0.25    2.27
  -8   3   6   -3.15    2.04
   8   3  -6    0.58    2.34
  -7  -3   6   38.08    6.51
   7   3  -6   32.84    6.83
  -7   3   6   34.40    4.80
   7   3  -6    2.42   15.75
   7  -3  -6   30.32    7.43
  -7   3   6   35.15    6.56
  -6  -3   6  148.68   11.02
   6  -3  -6  153.33   12.76
  -6   3   6  163.21   10.10
   6   3  -6  128.11   11.89
  -6   3   6  140.07   11.70
  -5   3   6   31.78    6.19
   5   3  -6   25.76    5.66
  -5   3   6   30.93    4.66
  -5  -3   6   26.97    5.47
   5  -3  -6   28.78    6.41
  -5  -3   6   29.79    4.00
  -4   3   6    8.90    3.40
   4   3  -6    0.18    6.00
   4  -3  -6    9.31    4.12
   4  -3  -6   -0.63    5.12
  -4  -3   6   11.52    3.52
  -4   3   6   10.20    3.82
  -4  -3   6    8.03    2.39
   4   3  -6    8.77    3.59
   3  -3  -6  269.36   16.67
  -3   3   6  247.85   14.17
  -3  -3   6  249.30   15.00
   3   3  -6  248.13   15.61
  -3  -3   6  234.62   13.65
  -3   3   6  256.27   16.51
  -2  -3   6  103.93    7.79
  -2   3   6   91.34    7.98
  -2  -3   6  122.42    9.08
  -2   3   6  112.55    9.87
   2  -3  -6   96.39    8.93
   2   3  -6  101.75    8.63
   1   3  -6   58.50    5.96
  -1  -3   6   56.06    7.07
  -1   3   6   64.64    6.96
  -1  -3   6   31.44   14.76
  -1  -3   6   68.66    6.12
   1  -3  -6   62.87    6.79
  -1   3   6   64.68    6.51
   0   3  -6    2.93    2.43
   0  -3  -6    6.77    2.39
   0  -3   6   31.11   18.42
   0   3   6   12.70    3.69
   0  -3   6   10.12    2.97
   0   3  -6    6.27    2.26
   0  -3  -6    7.27    3.39
   1   3   6   25.07    5.12
  -1  -3  -6   24.66    4.07
  -1   3  -6   20.70    5.29
  -1   3  -6   27.98    3.70
   1  -3   6   25.28    4.31
  -1  -3  -6   23.53    5.00
   2   3   6   42.36    6.43
  -2  -3  -6   47.58    5.04
  -2  -3  -6   52.26    6.68
   2  -3   6   46.41    5.39
  -2   3  -6   43.02    7.54
  -3   3  -6  127.19   11.52
   3  -3   6  125.95    9.91
  -3  -3  -6  129.53   10.09
  -3  -3  -6  124.71    8.93
   3   3   6  133.75   10.69
   4  -3   6    2.99    2.19
  -4  -3  -6   -0.14    1.77
   4  -3   6   25.96   18.40
   4   3   6    4.20    3.02
  -4  -3  -6    3.21    2.79
  -4   3  -6    1.22    2.19
  -5  -3  -6   31.61    5.78
   5  -3   6   44.61    6.55
   5   3   6   24.66    5.71
  -5   3  -6   48.33    7.76
  -5  -3  -6   41.25    5.81
   5  -3   6   -3.04   20.69
   6  -3   6    2.07   22.65
  -6   3  -6    5.14    2.66
  -6  -3  -6    0.41    2.96
  -6  -3  -6    1.84    2.11
   6   3   6    2.61    2.85
   6  -3   6    1.36    2.43
  -7  -3  -6    6.72    3.00
   7  -3   6    2.61    2.81
  -7  -3  -6    8.34    3.90
  -7   3  -6    6.51    3.32
   7   3   6   10.33    3.94
   7  -3   6   33.44   26.66
  -8  -3  -6   11.58    3.58
  -8   3  -6   15.37    5.05
   8  -3   6   23.46   25.60
   8   3   6    6.28    3.93
  -8  -3  -6    8.88    3.60
   8  -3   6   12.15    4.14
  -9  -3  -6   20.16    4.71
   9   3   6   10.94    4.85
  -9   3  -6   13.32    5.01
   9  -3   6   13.95   25.09
   9  -3   6   18.26    4.84
  10   3   6    6.39    3.71
 -10  -3  -6    8.15    3.58
  10  -3   6   14.92    4.41
 -10   3  -6    6.66    4.45
  10  -3   6   18.57   26.83
  11  -3   6   19.19   27.52
 -11  -3  -6    7.53    3.33
 -11   3  -6    0.38    3.42
  11   3   6    2.24    3.24
 -12  -3  -6    5.02    2.87
  12  -3   6   24.48   26.08
  12   3   6   -1.99    3.08
 -12   3  -6   -2.53    3.54
 -11   4   6   -0.28    4.56
  11   4  -6    2.68    3.08
 -11  -4   6    1.54    2.81
  10   4  -6   16.26    6.03
 -10   4   6   10.55    5.41
 -10  -4   6   20.99    6.06
   9   4  -6   15.00    5.12
  -9   4   6   12.86    5.23
  -9  -4   6   14.40    5.22
   9  -4  -6   21.50    6.97
   8  -4  -6    4.11    4.79
   8   4  -6    0.04    2.25
  -8   4   6    2.96    3.49
  -8  -4   6    4.00    2.93
   7   4  -6    0.98    2.35
  -7   4   6    2.15    2.99
  -7  -4   6    4.41    3.05
   7  -4  -6    3.89    4.21
  -6   4   6   12.29    5.13
  -6  -4   6   14.68    4.72
   6   4  -6    7.90    3.58
   6  -4  -6   18.11    6.02
  -5  -4   6   -1.68    1.64
  -5  -4   6    2.15    1.80
  -5   4   6    1.82    3.29
   5  -4  -6   -5.13    2.52
   5   4  -6    0.43    2.33
  -5   4   6   -1.50    2.00
  -4   4   6    4.12    3.08
  -4  -4   6    0.65    2.28
   4  -4  -6    4.66    3.55
   4   4  -6    0.74    2.04
  -4  -4   6    0.26    1.38
  -4   4   6    1.95    2.91
   3  -4  -6    7.10    3.88
  -3   4   6   13.07    5.09
  -3   4   6    5.96    2.93
   3   4  -6    7.76    3.25
  -3  -4   6    3.98    2.08
  -3  -4   6    7.24    3.46
   2   4  -6   29.98    5.37
   2  -4  -6   43.48    7.62
  -2   4   6   43.56    6.76
  -2  -4   6   27.90    4.93
  -2   4   6   37.65    7.88
  -2  -4   6   30.43    6.47
  -1   4   6   70.21    9.35
  -1  -4   6   65.25    6.80
   1   4  -6   48.24    7.90
  -1   4   6   70.14    7.59
   1   4  -6   79.48    7.44
   1  -4  -6   73.97    8.41
   0   4  -6   56.62    8.73
   0  -4  -6   74.26    9.22
   0   4   6   71.06    7.81
   0  -4   6   64.88    7.02
   0   4   6   60.37    8.33
   1   4   6   -0.66    1.78
  -1   4  -6    1.05    2.00
   1  -4   6    1.22    1.77
  -1  -4  -6   -1.25    2.29
  -1  -4  -6    0.77    1.66
  -2  -4  -6    0.84    1.65
   2  -4   6    4.75    2.79
   2   4   6    1.26    2.44
  -2   4  -6    5.30    3.33
  -2  -4  -6    3.23    2.90
  -3   4  -6   -0.72    2.78
   3   4   6   -1.28    2.37
  -3  -4  -6    4.03    2.33
  -3  -4  -6   -2.94    1.84
   3  -4   6    1.26    2.18
   3  -4   6   22.51   19.72
   4  -4   6   30.42    6.26
  -4  -4  -6   30.12    5.67
  -4   4  -6   24.04    6.85
   4  -4   6   29.12   25.63
  -4  -4  -6   27.19    5.77
   4   4   6   28.62    6.83
   5  -4   6   21.15    5.58
  -5  -4  -6   18.26    4.53
   5   4   6   18.82    5.61
  -5  -4  -6   15.79    4.52
   5  -4   6   22.30   24.46
  -5   4  -6    9.55    4.45
   6  -4   6   26.87   29.20
  -6  -4  -6    1.80    2.33
  -6   4  -6   -0.25    2.36
  -6  -4  -6    4.40    2.81
   6   4   6   -0.59    2.58
   6  -4   6    2.98    3.31
   7  -4   6   41.80   30.18
  -7  -4  -6   -1.17    2.03
  -7   4  -6    1.49    2.64
   7  -4   6   -0.54    2.77
  -7  -4  -6   -1.69    1.86
   7   4   6   -0.72    2.71
  -8  -4  -6   21.86    5.56
   8  -4   6   -4.27   27.77
   8   4   6   14.08    5.25
   8  -4   6   26.50    6.51
  -8   4  -6   12.46    4.91
   9   4   6    6.41    3.89
  -9  -4  -6    3.55    3.19
   9  -4   6    4.57    3.55
   9  -4   6   -9.58   29.93
  -9   4  -6    4.04    3.89
 -10   4  -6    0.04    3.34
  10   4   6    5.64    3.58
  10  -4   6    1.93    3.56
  10  -4   6   -2.29   28.92
 -10  -4  -6    3.80    2.90
  -8  -5   6   -6.09    2.78
   8  -5  -6   -1.36    3.47
   8   5  -6    1.45    2.84
  -8   5   6    2.43    3.76
   7   5  -6   -1.89    2.83
  -7  -5   6    3.02    3.66
  -7   5   6   -5.57    2.66
   7  -5  -6   -3.09    3.43
   6   5  -6   -2.62    2.33
   6  -5  -6    0.91    3.68
  -6  -5   6   -1.39    2.76
  -6   5   6    3.91    3.52
   5   5  -6    5.97    3.43
   5  -5  -6   14.74    5.88
  -5   5   6   13.52    6.21
  -5  -5   6    4.29    3.65
   4  -5  -6    0.77    3.29
  -4  -5   6    6.72    4.16
  -4  -5   6    4.71    2.27
   4   5  -6    4.78    3.01
  -4   5   6    3.16    4.72
  -3   5   6    0.31    3.28
   3   5  -6   -1.46    1.82
   3  -5  -6   -4.49    2.64
  -3  -5   6    2.58    2.17
  -3  -5   6   -2.64    2.65
   2   5  -6    6.34    3.10
   2  -5  -6   18.62    5.80
  -2   5   6   20.32    5.25
  -2  -5   6   11.41    3.83
  -2   5   6   15.89    6.26
  -1   5   6   -1.57    2.07
  -1   5   6    0.28    2.82
  -1  -5   6   -0.68    2.02
   1   5  -6    2.23    2.37
   1  -5  -6    0.40    3.15
   0   5   6    0.89    2.69
   0   5  -6   -2.08    2.04
   0  -5  -6    2.18    3.13
   0  -5   6   -3.29    1.66
   0   5   6    0.25    2.24
   1   5   6   20.48    5.54
   1  -5   6   38.80    7.03
   1   5   6   34.32    6.80
  -1  -5  -6   41.86    7.65
  -1   5  -6   31.94    8.24
   2   5   6    2.18    2.89
  -2  -5  -6    6.26    3.73
   2  -5   6   -3.59    2.15
  -2   5  -6   -1.46    2.97
  -2  -5  -6    0.30    2.77
   3   5   6    7.11    3.89
  -3  -5  -6    6.28    3.59
   3  -5   6   10.55    4.03
  -3   5  -6   10.93    5.17
  -3  -5  -6   14.33    4.70
   4   5   6    3.55    3.58
  -4  -5  -6    6.69    3.19
  -4  -5  -6    9.44    4.15
   4  -5   6    6.15    3.68
  -4   5  -6    6.29    4.22
  -5  -5  -6    0.40    2.59
  -5   5  -6   -0.11    2.39
   5   5   6    4.01    2.97
  -5  -5  -6    1.08    2.30
   5  -5   6   -0.34    2.97
  -6   5  -6   -3.87    2.42
  -6  -5  -6    3.41    3.00
  -6  -5  -6    3.87    3.34
   6   5   6   -1.40    2.81
   6  -5   6   -2.25    2.31
   7  -5   6    0.88    3.45
   7   5   6   -4.27    2.90
  -7  -5  -6   -3.10    2.42
  -7   5  -6    3.64    3.42
   2  -6  -6   -1.89    3.39
  -2  -6   6    0.87    2.43
  -1   6   6    2.20    3.47
   1  -6  -6    1.13    3.53
  -1  -6   6    0.86    2.97
   1   6  -6    4.58    3.83
   0   6  -6    6.73    4.24
   0   6   6    1.41    3.18
   0  -6   6    1.44    3.10
   0  -6  -6    0.27    3.44
  -1  -6  -6   14.40    5.09
  15   0  -7   12.84   26.93
 -15   0   7   12.24    4.46
  14   0  -7   -8.76   17.06
 -14   0   7    1.24    3.57
 -14   0   7    4.19    3.46
 -13   0   7   13.66    5.12
 -13   0   7   19.80    5.29
  13   0  -7   76.53   28.26
  12   0  -7   -7.43   13.62
 -12   0   7   -4.43    2.42
 -12   0   7   -0.52    3.38
  11   0  -7   98.34   30.14
 -11   0   7  114.59   10.20
 -11   0   7  126.91   10.24
 -10   0   7   -0.10    2.25
  10   0  -7    3.10   10.70
 -10   0   7   -1.26    3.21
  -9   0   7   40.32    5.62
   9   0  -7    8.29   14.29
  -9   0   7   49.88    6.45
  -8   0   7   -1.28    1.56
  -8   0   7    2.69    3.26
   8   0  -7    4.01   14.90
  -7   0   7   16.28    3.74
   7   0  -7   -1.21   12.72
  -7   0   7   16.79    3.40
  -6   0   7    0.84    2.09
   6   0  -7    0.99    1.48
   6   0  -7   -1.33   10.44
  -6   0   7   -0.75    1.24
  -5   0   7  217.24   11.64
  -5   0   7  230.17   10.85
   5   0  -7  235.04   11.39
   4   0  -7    0.80    2.05
   4   0  -7    6.02    7.41
  -4   0   7    0.37    1.37
  -4   0   7    0.17    1.21
   3   0  -7  733.40   31.93
  -3   0   7  733.67   27.44
  -3   0   7  733.74   30.01
  -2   0   7   -0.53    6.97
  -2   0   7   -0.13    1.44
   2   0  -7    1.95    2.17
  -2   0   7    0.14    0.60
   1   0  -7   77.41    6.58
  -1   0   7   63.25    5.02
   0   0   7   -0.67    1.21
   0   0   7   -1.42    5.91
   0   0  -7   -0.78    1.75
  -1   0  -7  386.18   13.75
   1   0   7  288.72   15.20
  -1   0  -7  364.43   19.12
   2   0   7    3.69   11.02
   2   0   7   -0.84    1.09
  -2   0  -7    0.20    1.99
  -2   0  -7    0.28    1.43
   3   0   7 1145.35   47.03
  -3   0  -7 1261.50   54.18
  -3   0  -7 1218.25   45.51
   4   0   7   -5.35   10.89
   4   0   7    1.17    1.38
  -4   0  -7   -0.53    2.09
  -4   0  -7   -0.73    2.05
  -5   0  -7  115.13   10.25
   5   0   7  113.96    7.16
  -5   0  -7   99.04    7.57
  -6   0  -7    0.73    2.78
   6   0   7    1.57    1.44
   6   0   7    4.70   12.50
  -6   0  -7    0.59    2.21
  -7   0  -7   57.70    8.22
  -7   0  -7   50.29    6.56
   7   0   7   49.68    4.76
  -8   0  -7    2.53    4.14
  -8   0  -7    2.17    3.11
   8   0   7   28.34   15.87
   8   0   7    1.50    1.56
  -9   0  -7   20.49    6.26
   9   0   7   31.13   19.18
  -9   0  -7   16.39    5.40
  10   0   7   26.97   17.41
 -10   0  -7   -2.91    3.33
 -11   0  -7    7.20    4.40
  11   0   7   26.43   21.51
  12   0   7   36.01   21.32
  13   0   7   20.23   16.15
 -13   0  -7    3.50    3.92
 -15  -1   7    9.59    3.89
 -15   1   7   14.63    5.83
 -14  -1   7   23.47    5.43
  14  -1  -7   -7.25   21.33
 -14   1   7   26.14    7.37
 -14  -1   7   27.53    6.48
  14   1  -7   14.66   16.77
 -13  -1   7    9.81    3.95
 -13  -1   7    9.00    4.45
 -13   1   7    8.34    5.17
  13   1  -7   13.58   18.00
  13  -1  -7   23.37   22.11
 -12  -1   7    3.08    3.40
 -12   1   7    5.98    3.05
 -12   1   7   -1.68    4.45
 -12  -1   7    1.61    2.64
  12   1  -7    2.21   15.77
  12  -1  -7   -1.75   16.12
 -11   1   7    1.54    4.35
  11   1  -7    3.42   12.03
 -11  -1   7    3.73    2.98
  11  -1  -7    6.92   15.04
 -11   1   7    0.21    2.21
 -11  -1   7   -1.24    2.29
  10   1  -7   -7.32   12.90
 -10  -1   7    1.27    2.56
 -10   1   7    2.59    2.22
 -10  -1   7    1.61    2.30
 -10   1   7    1.76    4.83
  10  -1  -7   -0.81   13.03
  -9   1   7   18.49    5.59
  -9   1   7    8.54    2.95
   9  -1  -7    4.34   14.72
   9   1  -7   -8.80   11.36
  -9  -1   7    8.93    3.70
  -9  -1   7    8.47    3.24
  -8   1   7  272.11   15.93
  -8   1   7  270.30   14.32
  -8  -1   7  275.64   14.02
  -8  -1   7  265.89   15.50
  -7   1   7  113.44    7.78
  -7   1   7  122.22    9.43
  -7  -1   7  116.81    7.71
   7  -1  -7  129.69    9.06
  -7  -1   7  128.58    9.08
   6   1  -7    3.36    1.54
   6   1  -7  -10.09    9.22
   6  -1  -7    5.24    2.31
   6  -1  -7    0.94   10.38
  -6   1   7    4.16    3.01
  -6  -1   7    5.45    2.05
  -6   1   7    2.69    1.83
  -6  -1   7    3.17    2.04
  -5  -1   7   27.50    3.97
   5  -1  -7   27.73    3.95
  -5  -1   7   32.42    3.34
  -5   1   7   31.64    4.20
   5   1  -7   30.84    3.53
  -5   1   7   38.29    4.75
  -4   1   7  313.05   13.95
  -4  -1   7  277.43   13.13
   4  -1  -7  264.01   14.80
  -4  -1   7  304.87   14.53
   4   1  -7  280.60   15.94
  -4   1   7  303.91   14.31
  -3   1   7 1451.59   51.99
  -3  -1   7 1438.07   51.94
  -3  -1   7 1338.79   90.01
  -3  -1   7 1339.01   53.74
  -3   1   7 1373.92   54.13
   3  -1  -7 1403.12   57.48
   3   1  -7 1315.30   59.75
  -2  -1   7  133.44    7.59
   2   1  -7  127.21   10.42
   2  -1  -7  132.16    8.90
  -2   1   7  127.21    7.99
  -2  -1   7  127.33    7.28
  -2   1   7  146.46    7.04
  -1   1   7  289.32   11.90
  -1  -1   7  244.55   12.07
   1   1  -7  281.29   17.61
  -1  -1   7  273.05   12.50
   1  -1  -7  276.19   14.83
  -1   1   7  278.49   13.61
   0   1  -7  137.00   12.10
   0   1   7  150.59    8.96
   0  -1  -7  151.69    6.75
   0  -1  -7  159.11   10.42
   0   1  -7  154.29    8.54
   0  -1   7  166.93    7.95
   1   1   7   36.29    4.37
  -1  -1  -7   39.54    5.39
  -1   1  -7   34.07    3.44
  -1  -1  -7   33.70    2.49
   1  -1   7   11.93   12.83
  -1   1  -7   28.51    5.99
  -2   1  -7  208.39   15.96
  -2  -1  -7  209.69   12.89
   2   1   7  220.97   11.76
  -2   1  -7  216.45   11.03
  -2  -1  -7  203.68    9.29
  -3  -1  -7   18.69    2.41
   3   1   7   -2.46    9.90
  -3   1  -7   22.08    6.07
   3  -1   7    0.55    8.96
   3   1   7   22.71    3.64
   3  -1   7   13.75    1.99
  -3   1  -7   17.38    3.21
  -3  -1  -7   18.62    4.46
  -4  -1  -7   31.65    5.45
  -4   1  -7   36.02    7.50
  -4   1  -7   27.90    4.14
   4   1   7   19.84   15.48
  -4  -1  -7   28.58    3.38
   4   1   7   27.27    4.06
   4  -1   7   28.73    2.53
   5   1   7    4.61    2.27
   5   1   7    6.25   11.91
  -5   1  -7    1.76    2.25
   5  -1   7   -3.79    9.37
  -5  -1  -7    3.58    3.78
  -5   1  -7    1.12    2.35
  -5  -1  -7    0.65    1.81
  -6  -1  -7  129.89   11.03
  -6   1  -7  130.15   10.05
  -6   1  -7  132.92   13.55
  -6  -1  -7  135.54    8.48
   6   1   7  132.51    9.28
   7  -1   7   -7.01    8.70
  -7   1  -7    3.56    3.49
  -7  -1  -7   -0.17    2.75
   7   1   7   -0.44   12.82
  -7  -1  -7   -0.21    4.02
   7   1   7    2.57    1.97
  -7   1  -7    3.13    3.77
  -8  -1  -7   67.09    6.55
  -8   1  -7   55.95   10.33
  -8   1  -7   66.79    8.69
  -8  -1  -7   65.29    8.81
   8   1   7   57.78    6.10
  -9   1  -7    1.25    3.38
  -9   1  -7    5.31    5.53
  -9  -1  -7   -0.81    2.37
   9   1   7    6.10   11.64
  -9  -1  -7   -0.73    4.38
   9  -1   7   23.40   15.16
   9   1   7    2.78    2.13
  10   1   7   17.58   13.82
  10  -1   7   31.03   20.28
 -10   1  -7   30.34    7.17
 -10  -1  -7   30.70    5.53
 -10   1  -7   27.78    7.33
  10   1   7   30.75    5.44
 -11   1  -7   19.44    6.56
 -11  -1  -7   18.50    4.65
  11  -1   7   41.68   23.45
  11   1   7   11.52   12.86
  12  -1   7   49.07   23.02
 -12   1  -7    0.49    4.82
 -12  -1  -7    1.01    2.57
  12   1   7    3.29   12.31
  13  -1   7   51.01   21.45
  13   1   7   19.97   15.44
  14  -2  -7   -5.84   24.73
 -14  -2   7    1.00    2.53
  14   2  -7    7.37    4.76
 -14   2   7   -4.51    4.40
  14   2  -7   11.17   14.24
  13   2  -7   -1.44    3.33
  13   2  -7    2.88   11.92
 -13  -2   7    1.21    2.33
  13  -2  -7   -2.18   22.88
 -13   2   7   -5.18    4.01
  12   2  -7   32.65   21.60
 -12  -2   7    2.79    2.49
 -12   2   7    4.53    5.97
  12  -2  -7    8.11   22.15
  11  -2  -7   -3.05   15.35
  11   2  -7   34.01   20.81
 -11   2   7   23.02    6.91
 -11  -2   7   35.97    7.28
 -11  -2   7   14.46    4.03
 -10   2   7    6.17    5.08
  10  -2  -7    5.76   14.96
  -9   2   7   15.92    5.96
   9   2  -7  -10.53   12.32
  -9  -2   7   17.85    4.26
  -9  -2   7   21.12    5.70
  -9   2   7   16.08    3.41
   9  -2  -7   -0.68   12.45
  -8   2   7   53.69    5.10
   8  -2  -7   61.90    8.37
  -8  -2   7   66.62    8.19
   8   2  -7    4.28   18.08
  -8  -2   7   39.56    5.51
  -8   2   7   47.88    7.12
  -7   2   7    5.20    3.11
   7  -2  -7    3.51    3.21
  -7  -2   7    5.21    2.34
   7   2  -7   10.62   17.64
  -7   2   7    6.08    2.49
  -7  -2   7    9.49    3.10
   7  -2  -7   -0.91    7.27
  -6   2   7  325.66   16.05
  -6   2   7  314.07   16.74
   6  -2  -7  277.85   17.73
  -6  -2   7  294.38   16.87
  -6  -2   7  323.03   15.98
  -5  -2   7   21.32    3.98
  -5  -2   7   21.99    2.60
   5  -2  -7   20.91    4.52
   5   2  -7   11.04    9.77
  -5   2   7   20.05    3.67
  -5  -2   7   25.63    4.63
  -5   2   7   21.35    4.11
   5  -2  -7    2.50    8.06
   4   2  -7   -6.51    4.77
   4  -2  -7    1.42    7.41
  -4  -2   7    1.65    2.04
  -4   2   7    1.52    1.59
  -4  -2   7    1.74    1.19
   4  -2  -7   -0.18    1.91
  -4   2   7    1.56    1.28
  -4  -2   7    1.42    1.42
   3  -2  -7    0.30    2.12
   3  -2  -7   -1.27    6.63
  -3  -2   7   12.60    8.87
  -3  -2   7    0.03    1.08
  -3  -2   7   -1.05    1.47
  -3  -2   7    0.75    1.10
  -3   2   7    2.66    1.66
  -3   2   7    1.76    1.66
  -2  -2   7   46.81    4.79
  -2   2   7   42.66    4.69
   2  -2  -7   47.86    5.94
  -2  -2   7   47.07    4.59
  -2  -2   7   48.22    4.39
  -2   2   7   40.21    4.51
  -1   2   7  263.10   13.88
  -1   2   7  244.84   13.67
   1  -2  -7  251.77   14.88
  -1  -2   7  256.46   12.70
  -1  -2   7  241.82   13.18
  -1  -2   7  263.04   13.66
   0   2  -7    7.73    2.36
  -1  -2  -7   21.14    3.06
   1   2   7   24.22    4.32
   1  -2   7   24.84   14.45
   1  -2   7   24.03    2.63
   1  -2   7   20.22    3.45
  -1  -2  -7   18.92    4.38
  -1   2  -7   22.29    4.41
   2   2   7  156.22   10.73
   2  -2   7  178.92    8.04
  -2  -2  -7  147.66    8.82
  -2  -2  -7  163.78   11.11
   2  -2   7  172.61   10.35
  -2   2  -7  155.83   11.02
  -3   2  -7    4.76    2.29
  -3  -2  -7    7.30    2.06
   3  -2   7    8.87    2.44
  -3  -2  -7    7.17    3.81
   3   2   7    4.98    2.46
   3   2   7   -6.14    4.79
  -4  -2  -7    0.96    3.08
   4   2   7    1.10    8.78
   4   2   7    1.13    1.77
   4  -2   7   -8.64    9.38
  -4  -2  -7    0.13    1.13
   4  -2   7    1.49    1.63
  -4   2  -7   -0.04    1.43
   5   2   7   45.72    6.36
  -5  -2  -7   54.23    7.05
  -5  -2  -7   43.94    4.58
  -5   2  -7   41.49    6.11
   5  -2   7   53.27    5.42
   6  -2   7   34.51    4.84
  -6  -2  -7   29.30    4.53
  -6  -2  -7   30.30    5.89
   6   2   7   24.22    4.89
   6   2   7    1.87   10.23
  -6   2  -7   23.60    5.08
   7  -2   7   30.44    4.89
  -7   2  -7   17.09    4.92
   7   2   7   14.58    4.09
   7  -2   7    4.93   13.04
   7   2   7    4.63   12.47
  -7  -2  -7   27.84    5.71
  -7  -2  -7   30.47    4.80
  -8   2  -7   59.68   10.90
  -8   2  -7   82.96    9.10
  -8  -2  -7   88.55    7.60
  -8  -2  -7  105.74    9.55
   8   2   7   87.71    8.51
   9   2   7   67.34    8.30
  -9  -2  -7   55.53    6.07
  -9   2  -7   63.38   11.78
  -9   2  -7   55.43    8.66
 -10   2  -7   14.85    6.05
 -10  -2  -7   34.21    5.67
 -10   2  -7   25.41    8.37
  10   2   7   30.85    6.24
  10  -2   7   -0.69   15.31
 -11  -2  -7   16.95    4.11
  11   2   7   13.03    4.39
  11  -2   7    0.65   16.16
 -11   2  -7   11.27    5.44
 -12  -2  -7    3.78    2.33
  12  -2   7    6.60   18.15
 -12   2  -7   -2.78    4.84
  12   2   7    1.37    2.94
  13   3  -7   -3.99    3.48
  13  -3  -7    5.71   19.66
 -13  -3   7    1.18    2.86
 -13   3   7   -3.59    4.97
  12   3  -7   -1.88    3.07
  12  -3  -7   19.97   19.44
 -12  -3   7    2.75    2.55
 -12   3   7    3.32    5.29
 -11  -3   7    1.94    2.64
 -11   3   7    3.57    4.47
  11  -3  -7   12.99   17.49
  11   3  -7    5.60    3.65
  10   3  -7   -1.17    2.94
  10  -3  -7   -6.61   12.95
 -10   3   7    3.76    4.27
 -10  -3   7    2.49    2.33
   9   3  -7   13.31    5.21
   9  -3  -7    9.17   14.29
  -9  -3   7    8.56    3.38
  -9   3   7    6.50    4.10
   9  -3  -7   12.25    5.80
   8   3  -7    1.29   18.35
   8   3  -7    3.54    3.19
   8  -3  -7    6.28    4.48
   8  -3  -7   -0.73   11.68
  -8   3   7    7.82    3.04
  -8  -3   7    7.04    3.09
  -8   3   7    1.53    2.92
   7   3  -7    6.05   16.08
   7  -3  -7    4.64   12.01
  -7  -3   7    6.87    3.24
   7  -3  -7    6.78    3.80
  -7   3   7    6.11    2.67
  -7   3   7    6.72    3.43
   6  -3  -7   58.20    8.57
  -6   3   7   55.08    5.74
  -6   3   7   65.42    8.27
  -6  -3   7   58.10    7.65
   5   3  -7    3.36    8.41
   5  -3  -7    5.43    7.01
  -5  -3   7   15.48    3.01
  -5   3   7   17.91    4.72
  -5   3   7   19.81    4.23
  -5  -3   7   21.36    4.95
   5  -3  -7   22.23    5.69
  -4   3   7   68.35    6.62
  -4  -3   7   62.74    7.55
   4  -3  -7   65.18    8.43
  -4   3   7   62.64    8.33
  -4  -3   7   55.93    5.19
   3  -3  -7   35.03    6.26
  -3  -3   7   34.97    4.10
  -3  -3   7   38.93    5.98
  -3   3   7   45.68    6.00
  -3   3   7   47.81    7.20
   2  -3  -7  139.93   11.20
  -2   3   7  169.80   10.97
  -2  -3   7  150.04   10.71
  -2   3   7  166.56   12.29
  -2  -3   7  158.23   18.02
  -2  -3   7  138.32    9.50
  -1   3   7   44.72    6.14
   1   3  -7   42.67    5.48
  -1  -3   7   47.08    6.68
  -1  -3   7   41.28    4.67
   1  -3  -7   38.39    6.34
  -1   3   7   51.88    6.93
   0  -3   7    0.82    1.44
   0  -3  -7   -0.72    2.31
   0   3  -7   -0.95    1.19
   0  -3  -7    0.61    1.62
   0   3   7    1.13    1.77
   0  -3   7   14.14   17.68
   0   3  -7    0.57    1.74
  -1   3  -7    3.71    2.51
  -2  -3  -7   20.60    5.00
   2  -3   7   26.55    4.59
  -2  -3  -7   22.05    4.01
   2  -3   7    6.55   16.42
  -2   3  -7   20.26    5.13
   2   3   7   22.98    5.03
  -3   3  -7   24.05    6.06
  -3  -3  -7   18.93    3.86
   3  -3   7   15.70    4.20
  -3  -3  -7   18.34    4.97
   3   3   7   19.13    4.77
   4  -3   7    9.53    3.16
   4   3   7   10.00    3.70
  -4  -3  -7    6.84    2.73
   4  -3   7    3.17   18.77
  -4  -3  -7    2.22    3.19
  -4   3  -7   10.41    3.77
   5  -3   7   -0.74   24.26
   5   3   7    0.90    3.27
  -5  -3  -7    0.52    1.83
   5  -3   7   -0.94    1.82
  -5   3  -7   -0.74    1.56
  -5  -3  -7   -1.04    2.82
  -6   3  -7   79.37    9.77
  -6  -3  -7   76.22    7.36
   6  -3   7   84.65    8.52
   6   3   7   76.94    9.42
  -6  -3  -7   77.75    8.44
   7   3   7    0.17    2.25
  -7  -3  -7   -0.58    1.73
   7  -3   7   -5.55   20.44
  -7   3  -7    1.22    2.14
   7  -3   7    2.85    2.77
  -7  -3  -7    0.55    2.91
  -8  -3  -7   10.06    3.18
   8  -3   7   11.18    4.03
  -8  -3  -7   12.28    4.14
   8   3   7    5.44    3.78
   8  -3   7   17.83   24.35
  -8   3  -7    3.49    3.39
   9  -3   7   13.59   20.30
   9   3   7    3.75    3.20
   9  -3   7   -1.99    2.43
  -9   3  -7    1.49    3.59
  -9  -3  -7    4.40    2.79
  10   3   7    3.44    3.08
 -10  -3  -7    6.08    2.98
  10  -3   7    2.52    3.19
  10  -3   7   12.64   21.01
 -10   3  -7    4.21    3.59
  11  -3   7    4.28   22.96
 -11  -3  -7    5.10    3.09
 -11   3  -7    6.13    5.47
 -11   3  -7    0.39    3.82
  11   3   7    0.11    3.03
 -11  -4   7    5.34    3.55
  11   4  -7    1.77    3.24
 -11   4   7   -1.90    4.48
 -10  -4   7    4.41    3.10
 -10   4   7    1.14    4.29
  10   4  -7   11.26    4.98
  -9   4   7    6.18    3.97
   9  -4  -7   10.78    5.34
   9   4  -7    6.21    3.71
  -9  -4   7    3.48    3.21
   8  -4  -7   -3.27    3.59
  -8   4   7    3.13    3.41
   8   4  -7    2.56    2.69
  -8  -4   7    4.33    3.29
   7   4  -7    0.53    2.59
  -7   4   7    1.46    3.18
   7  -4  -7   -2.11    3.80
  -7  -4   7    2.23    2.86
  -6   4   7    3.16    2.74
  -6  -4   7    8.61    3.62
   6  -4  -7    9.45    4.52
   6   4  -7    4.96    3.09
   5  -4  -7   70.23   10.15
  -5   4   7   94.63   12.17
  -5   4   7   86.59    7.94
  -5  -4   7   67.40    9.23
   5   4  -7   68.27    9.06
  -5  -4   7   72.29    6.66
   4   4  -7   -0.03    2.07
  -4   4   7   -0.24    2.26
  -4  -4   7    2.10    1.53
   4  -4  -7    2.63    3.64
  -4   4   7    3.12    3.02
  -4  -4   7   -1.55    2.44
  -3   4   7   32.72    5.83
   3   4  -7   18.55    4.79
   3  -4  -7   23.45    5.98
  -3  -4   7   19.79    4.14
  -3  -4   7   27.81    6.07
  -3   4   7   21.48    6.02
   2  -4  -7   22.12    5.84
   2   4  -7   13.96    3.98
  -2   4   7   24.11    5.27
  -2  -4   7   17.93    5.10
  -2   4   7   13.66    5.17
  -1   4   7   21.41    5.29
  -1  -4   7   22.50    4.36
   1   4  -7   13.29    4.51
  -1   4   7   24.90    6.03
   1  -4  -7   29.21    6.47
   1   4  -7   25.71    4.80
   0  -4   7    0.33    1.57
   0   4   7    1.66    2.88
   0  -4  -7   -1.74    2.27
   0   4  -7    0.03    1.94
   0   4   7    2.09    2.33
  -1   4  -7   57.69    9.58
  -1  -4  -7   54.53    6.86
   1  -4   7   53.51    6.93
   1   4   7   54.84    7.93
  -1  -4  -7   53.57    7.85
  -2  -4  -7   -0.42    2.17
   2   4   7   -0.23    1.91
   2  -4   7    0.12    1.67
  -2  -4  -7    0.14    1.82
  -2   4  -7    2.78    3.04
  -3  -4  -7   41.92    6.29
   3  -4   7    3.53   25.29
   3  -4   7   43.00    7.01
   3   4   7   41.31    7.45
  -3  -4  -7   43.31    7.00
  -3   4  -7   34.76    8.05
   4  -4   7    2.60    2.83
  -4   4  -7    4.15    3.40
   4   4   7   -1.86    2.12
  -4  -4  -7    2.53    2.35
  -4  -4  -7    0.60    2.34
   4  -4   7    3.06   25.38
   5  -4   7   16.34   26.48
   5   4   7    6.66    3.78
  -5  -4  -7    4.96    2.97
  -5  -4  -7    5.94    3.22
  -5   4  -7    5.39    3.32
   5  -4   7    2.52    2.85
  -6  -4  -7    4.93    2.69
   6  -4   7    2.56    2.72
   6   4   7    7.09    3.85
   6  -4   7  -14.11   26.12
  -6   4  -7    0.09    2.14
  -7  -4  -7   21.29    5.33
   7  -4   7    1.74   30.75
   7  -4   7   24.44    6.17
   7   4   7   24.72    6.83
  -7   4  -7   17.55    5.51
  -7  -4  -7   22.10    5.34
   8  -4   7    3.62    3.54
   8   4   7    2.99    4.08
  -8   4  -7    3.77    3.11
   8  -4   7   47.82   33.81
   9  -4   7    3.96    3.64
   9   4   7    9.33    5.42
   9  -4   7   60.36   35.17
  -9  -4  -7   12.67    4.11
  -9   4  -7    7.80    4.13
 -10  -4  -7    3.12    2.56
 -10   4  -7   -1.11    3.43
  10  -4   7    1.41    3.38
  -8   5   7    3.43    3.85
  -8  -5   7    3.14    3.67
   8   5  -7   -1.67    2.45
   7   5  -7    3.69    2.95
  -7   5   7    1.44    3.57
   7  -5  -7   -3.38    3.09
  -7  -5   7    2.85    4.08
   6  -5  -7    6.76    4.42
   6   5  -7    0.55    2.31
  -6  -5   7    3.64    3.21
  -6   5   7    4.02    4.44
   5  -5  -7   -1.53    3.29
  -5  -5   7    2.30    2.76
   5   5  -7    1.09    2.48
  -5   5   7    1.89    4.12
  -4   5   7   13.83    5.85
   4  -5  -7   20.18    5.76
  -4  -5   7   19.01    5.97
  -4  -5   7   18.81    4.37
   4   5  -7   17.29    4.71
  -3  -5   7    2.12    1.86
  -3   5   7   -1.54    2.29
  -3  -5   7   -3.57    2.51
   3  -5  -7   -0.93    2.64
  -3   5   7    2.94    3.75
   2  -5  -7   49.73    8.77
  -2   5   7   49.89    7.76
  -2   5   7   38.10    8.81
  -2  -5   7   34.61    6.03
   2   5  -7   22.42    6.57
   1  -5  -7    9.84    4.53
   1   5  -7    4.50    3.89
  -1   5   7    9.54    3.69
  -1   5   7    6.75    3.82
   0  -5   7    1.41    2.28
   0   5   7    1.44    2.47
   0  -5  -7    0.81    3.18
   0   5  -7    0.89    2.94
   0   5   7    1.30    2.56
   1   5   7   -2.71    2.15
  -1   5  -7   -0.15    3.11
  -1  -5  -7    5.26    3.86
   1   5   7    0.61    2.53
   1  -5   7   -1.18    1.92
  -2  -5  -7   36.84    7.58
  -2  -5  -7   35.43    6.55
  -2   5  -7   37.21    9.23
   2   5   7   37.38    7.71
   2  -5   7   31.79    6.20
  -3  -5  -7    1.33    2.28
   3   5   7    1.30    2.96
   3  -5   7   -0.43    2.33
  -3  -5  -7    3.13    2.77
  -3   5  -7   -3.38    2.69
   4  -5   7   -0.74    2.81
   4   5   7    1.28    3.18
  -4   5  -7   -3.56    2.88
  -4  -5  -7    2.52    2.42
  -4  -5  -7    3.55    2.88
   5   5   7    8.49    4.27
  -5  -5  -7    2.55    2.88
   5  -5   7    4.92    3.42
  -5   5  -7    5.12    3.78
  -5  -5  -7   12.20    4.69
  -6  -5  -7    3.26    3.00
  -6  -5  -7    2.13    3.11
   6   5   7   -2.56    2.77
   6  -5   7    1.40    3.16
  -6   5  -7   -0.58    2.63
   7   5   7    9.37    3.44
  -7  -5  -7   -0.25    2.75
   7  -5   7    5.30    3.63
  -7   5  -7   -3.43    2.25
  15   0  -8   -8.34   25.10
 -15   0   8    1.37    3.20
 -14   0   8    2.95    3.18
  14   0  -8    1.09   16.34
 -14   0   8    0.12    3.26
  13   0  -8    5.70   15.02
 -13   0   8    2.40    3.11
 -13   0   8   -0.46    3.06
  12   0  -8   19.17   17.68
 -12   0   8   26.62    6.07
 -12   0   8   32.20    5.93
 -11   0   8    1.83    3.47
 -11   0   8    4.59    2.97
  11   0  -8    3.35   11.80
 -10   0   8   65.36    6.83
 -10   0   8   68.43    7.22
  10   0  -8   44.04   22.61
  -9   0   8   -2.63    2.87
  -9   0   8   -1.82    1.86
   9   0  -8    2.57   12.10
  -8   0   8    7.83    3.42
  -8   0   8    2.99    2.02
   8   0  -8   -6.00   11.35
  -7   0   8   -1.42    2.27
   7   0  -8    8.02   13.60
  -6   0   8  743.72   32.12
   6   0  -8  777.14   32.13
  -6   0   8  749.66   30.22
  -5   0   8    0.91    1.61
   5   0  -8    0.06    9.56
  -5   0   8    0.76    1.49
   5   0  -8    0.42    2.29
   4   0  -8   91.42    6.78
  -4   0   8   77.94    5.92
  -4   0   8   86.47    4.93
   3   0  -8    3.86    6.78
   3   0  -8    0.67    2.24
  -3   0   8   -0.45    0.79
  -3   0   8    1.05    1.76
  -2   0   8    3.35    2.06
  -2   0   8    1.65    7.24
   2   0  -8    5.26    2.62
  -2   0   8    2.39    0.67
   1   0  -8    0.85    2.20
  -1   0   8    1.24    1.75
  -1   0   8   -2.54    7.13
   0   0  -8  965.71   43.17
   0   0   8  948.47   38.36
   1   0   8   -6.08    7.70
   1   0   8    1.13    1.51
  -1   0  -8   -1.47    1.01
  -1   0  -8    0.45    2.08
  -2   0  -8  184.90    8.63
   2   0   8  185.00    9.88
  -2   0  -8  186.77   13.08
   3   0   8    0.50    1.18
  -3   0  -8   -0.61    2.02
   3   0   8   -0.72   10.67
  -3   0  -8   -0.46    1.73
  -4   0  -8  276.65   13.11
  -4   0  -8  239.71   16.95
   4   0   8  285.13   13.68
   5   0   8    0.68    1.34
  -5   0  -8    2.65    2.78
   5   0   8   -7.49   10.53
  -5   0  -8    1.31    2.37
   6   0   8   16.55    3.22
  -6   0  -8   22.41    4.51
   6   0   8    7.05   12.20
  -6   0  -8   15.65    5.13
   7   0   8    0.15    1.45
  -7   0  -8    3.26    3.91
  -7   0  -8    1.52    3.24
   7   0   8   -0.13   10.67
  -8   0  -8   36.24    7.62
  -8   0  -8   20.85    5.51
   9   0   8  -16.70   10.40
  -9   0  -8   -1.50    2.92
  -9   0  -8    1.08    3.97
  10   0   8   -1.58   13.67
 -10   0  -8   30.96    6.17
 -10   0  -8   27.86    7.75
 -11   0  -8   -0.79    3.64
  11   0   8   -4.72   13.40
 -12   0  -8    6.44    4.31
  12   0   8    2.21   14.37
 -13   0  -8    2.73    3.16
  13   0   8   -1.15   14.78
 -14  -1   8   -2.55    3.31
 -14   1   8    4.70    4.41
  14  -1  -8   25.78   28.44
 -14  -1   8    6.24    3.23
  14   1  -8   18.40   18.96
  13  -1  -8   -1.03   17.04
 -13  -1   8   13.47    4.33
 -13   1   8   15.28    5.95
  13   1  -8   26.81   18.57
 -13  -1   8   11.82    4.61
 -12  -1   8    4.03    2.80
 -12   1   8   -1.51    2.28
 -12   1   8    0.93    4.10
  12  -1  -8   -8.36   15.42
 -12  -1   8    1.84    3.01
  12   1  -8    3.62   11.98
  11   1  -8   -0.40   12.31
  11  -1  -8    4.19   16.43
 -11   1   8   18.53    5.97
 -11   1   8   20.69    4.63
 -11  -1   8   30.58    5.33
 -11  -1   8   30.97    6.24
 -10   1   8   10.07    5.39
  10   1  -8   -7.67   11.74
  10  -1  -8    2.86   17.86
 -10   1   8   12.43    3.65
 -10  -1   8   10.95    4.26
 -10  -1   8   10.81    3.75
  -9   1   8  106.23    7.91
  -9  -1   8  102.55    7.85
  -9   1   8   95.45    9.49
  -9  -1   8   99.26    8.74
   8  -1  -8    7.31   14.98
  -8   1   8   -0.39    3.63
  -8  -1   8    0.78    1.94
   8   1  -8    5.03   15.84
  -8   1   8    0.92    1.74
  -8  -1   8    0.27    2.05
   7  -1  -8   11.83    3.43
  -7   1   8   13.27    4.48
  -7   1   8   11.72    3.13
   7   1  -8    6.62   15.46
  -7  -1   8   14.58    3.53
   7  -1  -8    5.74   11.62
  -7  -1   8   11.78    2.85
   6  -1  -8   -0.14    9.37
  -6   1   8   28.70    4.04
  -6  -1   8   27.70    3.53
   6   1  -8    0.37    9.86
   6   1  -8   22.09    3.10
   6  -1  -8   26.74    4.14
  -6  -1   8   20.78    3.89
  -6   1   8   25.81    4.70
   5   1  -8    2.61    1.55
   5  -1  -8   -1.10    8.73
  -5  -1   8    3.62    2.13
  -5   1   8    0.75    2.02
  -5  -1   8    3.76    1.73
   5   1  -8   -0.19    7.11
  -5   1   8    1.96    2.47
   5  -1  -8    1.44    2.37
  -4  -1   8  119.97    7.94
  -4   1   8  132.11    8.11
  -4  -1   8  129.98    7.31
   4   1  -8  133.68    9.45
   4  -1  -8  108.38    8.38
  -4   1   8  123.98    7.43
  -3  -1   8  171.47    9.73
  -3   1   8  181.53    8.85
  -3   1   8  190.26   10.36
   3   1  -8  173.28   12.46
   3  -1  -8  176.31   11.07
  -3  -1   8  168.23    9.00
  -2   1   8  158.61    7.47
  -2   1   8  156.37    9.26
  -2  -1   8  141.31    8.09
   2   1  -8  147.58   11.90
  -2  -1   8  161.61    8.81
   2  -1  -8  165.50   10.52
   1   1  -8   20.51    5.23
  -1   1   8   24.57    2.21
   1  -1  -8   24.49    4.51
  -1   1   8   24.10    3.91
  -1  -1   8   20.92    2.72
  -1  -1   8   21.27    3.01
   0  -1   8  382.67   16.37
   0   1   8  360.65   17.55
   0   1  -8  375.34   16.70
   0  -1  -8  384.28   14.63
   0  -1  -8  377.03   19.67
   0   1  -8  361.25   22.77
   1  -1   8    7.13    9.10
  -1  -1  -8    5.17    3.38
   1   1   8    1.88    6.28
  -1   1  -8    4.28    1.60
   1  -1   8    2.52    1.10
  -1  -1  -8    4.76    1.07
   1   1   8    5.89    2.43
  -1   1  -8    5.92    3.63
   2   1   8  589.90   24.93
  -2  -1  -8  532.91   21.26
  -2   1  -8  517.18   23.10
  -2  -1  -8  551.24   26.80
  -2   1  -8  555.04   31.37
   3  -1   8  384.29   17.34
  -3  -1  -8  441.22   22.07
  -3  -1  -8  420.97   17.03
   3   1   8  437.78   20.03
  -3   1  -8  379.76   18.54
  -3   1  -8  425.48   26.42
  -4  -1  -8   79.35    5.62
  -4   1  -8   89.77   10.68
  -4   1  -8   98.62    7.27
  -4  -1  -8   82.75    8.45
   4  -1   8  103.30    5.55
   4   1   8   76.09    6.73
   5   1   8  102.91    7.86
  -5   1  -8  101.25    8.08
  -5  -1  -8  104.25    6.79
  -5   1  -8   88.92   12.12
  -5  -1  -8  100.10    9.63
  -6  -1  -8   81.08    9.12
  -6   1  -8   74.77   11.55
   6   1   8   85.55    7.24
  -6  -1  -8   81.51    6.67
  -6   1  -8   84.54    8.06
   7   1   8  193.92   12.45
  -7   1  -8  194.78   13.51
  -7  -1  -8  218.55   11.92
  -7  -1  -8  203.25   14.91
  -7   1  -8  191.87   17.79
  -8  -1  -8   21.93    6.73
   8  -1   8    1.16    8.36
  -8   1  -8   18.43    6.29
  -8  -1  -8   18.33    4.33
  -8   1  -8   20.82    6.25
   8   1   8   17.24    4.27
   8   1   8   -6.11   10.49
  -9   1  -8    5.01    3.97
  -9  -1  -8    4.55    3.06
   9   1   8    7.95   13.49
  -9   1  -8   11.35    5.68
  -9  -1  -8    3.84    5.11
   9  -1   8    2.68   11.29
   9   1   8    6.54    2.66
 -10  -1  -8    2.82    2.68
  10   1   8   -8.31    9.65
  10  -1   8  -11.49    9.20
 -10   1  -8    0.86    4.08
 -10   1  -8    0.35    3.64
 -11  -1  -8    4.22    3.15
  11   1   8   -8.01    9.78
  11  -1   8   -4.37   13.29
 -11   1  -8    9.99    5.39
  12  -1   8    1.58   13.09
 -12  -1  -8   33.30    6.09
 -12   1  -8   26.32    7.07
  12   1   8   -2.24   11.80
  13  -1   8  -13.61   12.99
  13   1   8   -8.36   12.01
 -13   1  -8    3.09    4.60
 -13  -1  -8   13.10    3.90
  14   2  -8    0.26    4.19
 -14  -2   8    1.95    2.08
 -14   2   8    0.59    4.70
  14  -2  -8    6.29   28.36
  14   2  -8   -8.47   11.39
  13   2  -8    4.86   13.32
  13  -2  -8   15.84   25.38
 -13   2   8    1.48    5.39
 -13  -2   8    0.37    2.00
 -12   2   8   -5.41    4.45
  12   2  -8    9.54   13.87
 -12  -2   8    1.73    2.30
 -12  -2   8   -3.22    3.45
  12  -2  -8    7.31   18.12
  11  -2  -8   13.80   17.86
 -11  -2   8   15.04    5.53
 -11   2   8    1.84    5.53
 -11  -2   8    5.34    3.14
  11   2  -8   48.12   25.97
 -10   2   8    1.35    4.77
 -10  -2   8    4.71    2.66
  10  -2  -8   10.21   13.86
 -10   2   8    4.86    2.53
  10   2  -8    2.83   12.92
 -10  -2   8    5.73    3.66
   9  -2  -8    2.19   12.63
  -9   2   8   -2.25    3.88
  -9   2   8    0.24    2.01
  -9  -2   8    1.72    2.57
  -9  -2   8    0.10    1.80
   9   2  -8  -12.20   15.09
   8  -2  -8   -2.09   11.13
   8   2  -8   15.57   18.68
  -8  -2   8    6.87    3.57
  -8   2   8    6.03    3.96
   8  -2  -8    0.82    2.92
  -8   2   8    3.43    2.16
  -8  -2   8    3.46    2.32
  -7   2   8    9.18    3.72
   7   2  -8    9.71   15.54
  -7   2   8   11.22    3.34
  -7  -2   8   14.85    4.05
   7  -2  -8   10.70    3.92
  -7  -2   8   11.22    3.20
   7  -2  -8   -2.88    9.54
   6  -2  -8    1.85    2.86
   6   2  -8    3.18   11.48
   6  -2  -8   -0.43    8.87
  -6  -2   8    4.44    2.02
  -6   2   8    7.63    2.76
  -6   2   8    4.18    2.33
  -6  -2   8    4.80    2.70
  -5   2   8  109.13    7.77
  -5  -2   8  102.94    6.34
   5  -2  -8  107.47    8.88
  -5   2   8   90.83    7.57
  -5  -2   8  106.27    8.37
  -5  -2   8   87.09    7.28
  -4  -2   8    4.06    2.08
   4  -2  -8   -0.75    7.59
   4   2  -8    1.05    6.71
  -4  -2   8    4.42    2.45
  -4   2   8    2.31    1.79
  -4   2   8    0.14    1.60
  -4  -2   8    2.22    1.30
   4  -2  -8   -0.09    2.15
  -3   2   8  406.98   19.84
  -3  -2   8  405.93   19.47
   3  -2  -8  425.31   21.48
  -3   2   8  392.95   19.55
  -3  -2   8  431.17   19.29
  -3  -2   8  382.28   19.35
   2  -2  -8   -0.76    5.09
  -2  -2   8   -0.02    1.57
   2  -2  -8    3.91    2.98
  -2  -2   8    0.35    1.06
  -2   2   8    0.92    1.37
  -2  -2   8    0.12    1.37
  -2  -2   8    9.90   12.22
  -2   2   8    3.20    2.03
  -1  -2   8   28.43    3.75
  -1  -2   8   34.77    4.75
  -1   2   8   25.90    4.11
  -1  -2   8   28.92    3.73
   1  -2  -8   32.01    5.34
  -1   2   8   35.72    4.91
  -1  -2   8   15.65   12.94
   0  -2  -8   32.71    3.19
   0   2  -8   34.48    5.19
   0  -2   8    0.70   13.16
   0  -2  -8   32.70    5.52
   0  -2   8   34.13    3.41
   0   2   8   34.63    4.94
   0  -2   8   28.71    3.88
  -1  -2  -8   27.21    4.97
  -1   2  -8   19.67    4.21
   1  -2   8   23.72    2.83
   1  -2   8   24.16    3.73
   1  -2   8   17.92   16.53
  -1  -2  -8   19.62    2.95
   1   2   8   26.28    4.57
   2  -2   8   11.12    1.84
  -2  -2  -8    9.68    2.28
   2   2   8   11.67    3.47
   2   2   8    1.07    4.33
  -2   2  -8   13.22    3.60
   2  -2   8   18.54   14.73
  -2  -2  -8   12.43    4.42
   2  -2   8    9.99    2.74
  -3  -2  -8   16.70    2.92
   3  -2   8   -0.81    9.30
   3  -2   8   14.35    3.14
  -3  -2  -8   22.89    5.23
   3   2   8    0.02    5.86
   3   2   8   16.64    4.07
  -3   2  -8    8.82    2.82
  -4  -2  -8  218.49   14.18
   4   2   8  211.15   13.39
  -4   2  -8  188.10   12.75
   4  -2   8  214.81   12.66
  -4  -2  -8  215.16   11.12
  -5  -2  -8   28.71    6.14
  -5  -2  -8   31.92    4.37
  -5   2  -8   26.08    5.22
   5  -2   8   29.25    4.60
   5  -2   8    4.43   11.74
   5   2   8   26.09    5.14
   5   2   8   11.78   12.86
  -6  -2  -8   97.51    7.27
   6  -2   8  106.90    8.30
  -6  -2  -8   96.04    9.86
   6   2   8   73.66    7.79
  -6   2  -8   85.35    8.26
   7  -2   8   -2.57   10.45
   7   2   8    1.81   12.60
  -7   2  -8   23.54    8.55
  -7  -2  -8   27.86    6.43
   7   2   8   27.38    5.56
  -7  -2  -8   29.78    4.77
  -7   2  -8   16.64    4.88
  -8  -2  -8   38.20    6.97
  -8   2  -8   21.91    5.90
  -8   2  -8   36.88    9.92
  -8  -2  -8   36.52    5.45
   8   2   8   27.80    5.61
   9  -2   8    5.15   13.27
  -9   2  -8   -2.52    3.91
  -9   2  -8   -0.97    3.78
  -9  -2  -8    6.35    2.79
   9   2   8    3.67    2.91
 -10   2  -8   -1.13    3.89
  10   2   8    3.39    2.73
  10  -2   8    3.89   14.36
 -10   2  -8    5.90    5.44
 -10  -2  -8    7.29    2.75
  11  -2   8   18.54   18.71
 -11   2  -8   13.11    6.43
 -11  -2  -8   11.56    3.29
  11   2   8    5.41    3.37
 -11   2  -8    8.16    5.32
  12  -2   8    1.54   15.50
 -12   2  -8   -0.25    4.40
 -12  -2  -8    4.89    2.53
  13  -3  -8  -16.01   17.83
 -13  -3   8    4.77    3.08
 -13   3   8   -6.85    4.52
  12   3  -8    2.53    3.81
 -12   3   8   -2.75    4.57
  12  -3  -8   -2.55   16.57
 -12  -3   8    2.21    2.57
 -11   3   8   -3.46    3.89
  11   3  -8   -1.31    3.33
  11  -3  -8   -4.46   15.23
 -11  -3   8    2.96    2.54
 -10   3   8    0.62    3.97
 -10  -3   8   -0.80    1.82
  10  -3  -8   -2.08   14.30
  10   3  -8   -0.98    2.81
  -9   3   8   11.71    4.65
   9   3  -8    0.75   16.64
  -9  -3   8   16.07    4.33
   9  -3  -8   -7.54   15.64
  -8  -3   8   38.12    6.58
  -8   3   8   36.05    5.65
   8  -3  -8    3.94   14.17
  -8   3   8   26.95    6.13
   8  -3  -8   26.61    6.95
   8   3  -8    1.24   15.59
  -7   3   8   30.97    6.34
   7  -3  -8   51.12    8.38
  -7  -3   8   49.12    7.12
  -7   3   8   39.70    5.67
   7   3  -8    7.76   15.41
  -6  -3   8   79.29    8.29
  -6  -3   8   86.02    8.49
   6  -3  -8   63.63    8.67
  -6   3   8   66.70    8.36
  -6   3   8   88.88    7.47
  -5  -3   8    4.68    1.98
  -5  -3   8    5.05    3.07
  -5  -3   8    8.37    3.20
   5  -3  -8    4.38    3.05
  -5   3   8    2.66    2.32
   5  -3  -8    1.18    7.27
  -5   3   8    5.40    2.93
   5   3  -8    1.71    8.42
  -4  -3   8   28.33    5.61
  -4   3   8   26.21    5.77
  -4  -3   8   21.90    3.73
  -4  -3   8   19.37    4.58
  -4   3   8   28.85    5.06
   4  -3  -8   23.91    5.62
  -3   3   8   38.17    6.64
  -3  -3   8   75.12   16.96
  -3  -3   8   42.05    6.10
  -3  -3   8   29.90    4.28
  -3   3   8   36.85    5.63
  -3  -3   8   29.59    5.47
   3  -3  -8   29.46    5.94
   1   3  -8   18.96    4.56
  -1  -3   8   28.75    4.52
  -1   3   8   28.19    5.50
   1  -3  -8   36.39    6.30
  -1  -3   8   19.30   15.71
  -1   3   8   34.55    6.04
   0   3   8   40.34    6.17
   0  -3   8   38.21    5.25
   0  -3  -8   45.11    6.68
   0  -3   8    4.32   17.16
   0   3  -8   33.28    6.30
   1  -3   8   29.09    4.67
   1  -3   8   13.78   21.63
  -1  -3  -8   23.39    5.47
  -1   3  -8   31.22    6.41
   1   3   8   23.10    4.95
  -1  -3  -8   31.33    4.42
   2  -3   8   10.89    3.14
  -2   3  -8    4.78    2.90
  -2  -3  -8   10.44    2.81
  -2  -3  -8   10.02    4.61
   2  -3   8   26.05   20.41
   2   3   8    7.65    3.28
   3  -3   8   -1.46    1.45
  -3   3  -8    1.27    2.03
  -3  -3  -8    0.77    3.37
  -3  -3  -8   -0.05    1.59
   3   3   8    1.00    2.52
   3  -3   8   23.88   20.50
  -4  -3  -8   -1.03    3.09
   4   3   8    2.53    2.63
  -4  -3  -8    0.66    2.08
  -4   3  -8   -1.41    1.27
   4  -3   8   17.57   23.96
   4  -3   8    0.14    1.91
  -5  -3  -8  135.47    9.69
   5  -3   8  156.12   11.59
  -5   3  -8  117.68   11.03
  -5  -3  -8  144.19   11.77
   5   3   8  129.66   11.55
  -6  -3  -8   14.19    4.06
   6  -3   8   17.82    4.72
   6  -3   8   -0.72   21.60
  -6   3  -8   14.72    4.53
   6   3   8   17.96    5.17
  -6  -3  -8   18.36    5.35
   7  -3   8   11.50    4.24
  -7  -3  -8   11.90    3.45
   7  -3   8   -3.18   19.33
  -7  -3  -8   11.82    4.37
  -7   3  -8    4.90    3.29
   7   3   8   11.02    4.56
  -8   3  -8   21.49    6.08
   8  -3   8   28.04    5.78
  -8  -3  -8   27.90    5.96
   8  -3   8   13.23   21.66
   8   3   8   30.40    6.57
  -8  -3  -8   22.39    4.86
   9  -3   8    3.72   17.31
   9   3   8    9.34    4.77
  -9  -3  -8    5.17    2.98
   9  -3   8    3.14    3.12
  -9   3  -8    5.83    4.18
 -10  -3  -8    2.12    2.69
 -10   3  -8    7.92    5.60
  10  -3   8   -0.51   15.97
  10   3   8    3.12    3.42
 -10   3  -8   -2.10    3.44
 -11   3  -8   -2.93    3.26
  11   3   8    2.38    3.89
 -11  -3  -8    2.23    2.58
 -11   3  -8    6.75    6.18
  11  -3   8   -2.97   16.97
 -11   4   8   -2.48    3.43
 -11  -4   8    6.67    3.28
  11   4  -8    7.00    3.51
 -10  -4   8    7.79    3.81
 -10   4   8    3.17    3.96
  10   4  -8    5.96    3.59
   9  -4  -8   -7.87    3.56
   9   4  -8    5.30    3.45
  -9  -4   8    6.54    3.45
  -9   4   8   -0.11    3.12
  -8   4   8    1.42    2.79
  -8  -4   8    2.79    3.17
   8  -4  -8    4.39    4.50
   8   4  -8    5.22    3.11
   7   4  -8    8.02    3.86
   7  -4  -8   12.14    5.04
  -7  -4   8   -0.51    2.69
  -7   4   8    9.19    4.64
  -6   4   8    0.04    2.49
  -6  -4   8    2.29    2.92
   6   4  -8    1.54    2.65
  -6   4   8    2.79    2.90
   6  -4  -8    8.19    4.16
   5  -4  -8    8.08    4.62
   5   4  -8   10.49    4.38
  -5  -4   8    9.71    2.62
  -5   4   8    7.44    4.27
  -5   4   8    9.98    3.71
  -5  -4   8   13.27    4.42
  -4   4   8  123.31   10.08
   4  -4  -8  111.75   11.22
  -4  -4   8  104.77   10.26
   4   4  -8   96.80    9.61
  -4   4   8  117.38   12.18
  -4  -4   8   86.72    7.62
  -3  -4   8    8.52    3.98
  -3   4   8    6.33    3.48
  -3   4   8    7.12    2.95
   3  -4  -8    5.58    3.52
   3   4  -8    6.60    2.91
  -3  -4   8    2.34    1.88
  -2   4   8   15.31    4.54
  -2  -4   8    3.03    3.15
   2  -4  -8   10.09    4.46
  -2   4   8   13.45    4.87
   2   4  -8    4.93    2.67
  -2  -4   8    5.73    2.51
  -1   4   8   -0.87    1.94
  -1   4   8   -0.92    2.07
  -1  -4   8    0.75    1.30
   1   4  -8   -1.13    1.58
   1  -4  -8   -1.12    2.49
   0   4   8   -1.33    2.09
   0   4   8    4.84    2.81
   0  -4   8    1.24    2.03
   0  -4  -8    1.04    2.73
   0   4  -8    3.90    2.51
  -1  -4  -8    7.24    2.80
   1   4   8    1.23    2.33
  -1  -4  -8    8.15    3.69
   1  -4   8    5.88    2.52
  -1   4  -8    0.29    2.55
   2  -4   8   -6.66   22.49
   2   4   8   26.65    6.27
  -2   4  -8   16.23    5.89
  -2  -4  -8   20.05    4.39
  -2  -4  -8   37.92    6.86
   2  -4   8   28.24    5.50
  -3   4  -8   45.57    9.32
   3   4   8   41.63    7.78
  -3  -4  -8   55.87    8.19
  -3  -4  -8   56.96    7.22
   3  -4   8   -0.46   25.14
   3  -4   8   62.60    7.34
  -4  -4  -8    7.66    3.67
  -4  -4  -8    6.95    3.10
   4  -4   8    3.84    2.86
  -4   4  -8    2.48    2.81
   4  -4   8   17.10   27.48
   4   4   8    4.77    3.22
  -5  -4  -8   17.64    5.53
   5  -4   8    5.55   28.65
   5   4   8   12.11    4.54
  -5  -4  -8   15.05    3.87
   5  -4   8   11.14    4.28
  -5   4  -8   18.86    6.31
   6  -4   8   -2.68    2.31
  -6   4  -8    0.96    2.45
  -6  -4  -8   -3.99    1.68
   6   4   8    4.17    3.23
  -6  -4  -8    2.50    2.72
   6  -4   8   11.13   28.49
  -7  -4  -8   19.90    5.05
  -7   4  -8   15.08    5.10
   7  -4   8   34.80   33.12
   7  -4   8   19.03    5.58
  -7  -4  -8   22.56    5.53
   7   4   8   25.19    6.86
   8  -4   8   22.26   32.05
  -8  -4  -8   -2.48    2.25
   8   4   8    1.35    3.12
   8  -4   8    0.62    3.14
  -8   4  -8   -1.27    1.99
   9   4   8   11.66    5.12
  -9   4  -8    5.61    4.20
   9  -4   8   62.23   34.92
  -9  -4  -8    1.56    2.95
   9  -4   8    7.94    4.53
   8  -5  -8    0.37    4.36
  -8  -5   8    5.00    4.04
   8   5  -8    0.95    2.84
  -8   5   8    2.73    3.85
  -7  -5   8    1.77    3.29
   7   5  -8    1.59    2.90
  -7   5   8    5.44    3.63
   7  -5  -8    6.70    4.46
   6  -5  -8   -2.55    3.43
   6   5  -8    0.30    2.19
  -6  -5   8    7.93    4.41
  -6   5   8    0.84    3.21
  -5   5   8   -0.43    3.28
   5  -5  -8   -0.56    3.16
  -5  -5   8    0.97    2.84
   5   5  -8    0.15    2.19
  -4  -5   8    1.35    1.89
   4   5  -8    7.43    3.06
   4  -5  -8    8.89    4.31
  -4   5   8    5.64    4.32
  -4  -5   8    2.74    3.50
   3  -5  -8   13.42    4.86
  -3  -5   8    7.14    2.78
  -3  -5   8   10.90    4.73
  -3   5   8    3.25    3.78
  -3   5   8    2.77    2.83
   2  -5  -8    5.81    3.45
  -2   5   8    0.97    3.08
  -2  -5   8    3.37    2.11
  -2   5   8    5.30    3.33
   2   5  -8   -0.84    2.11
   1  -5  -8   15.88    5.33
   1   5  -8   13.16    4.64
  -1   5   8    8.95    4.48
  -1   5   8   12.29    5.04
  -1  -5   8   16.03    4.28
   0  -5  -8    1.74    3.03
   0   5   8   -2.14    2.53
   0  -5   8    1.70    2.21
   0   5  -8    6.34    3.54
   0   5   8    4.05    2.74
  -1  -5  -8   38.28    7.71
   1   5   8   27.23    6.55
   1   5   8   29.06    6.55
  -1   5  -8   28.34    7.58
   1  -5   8   38.55    6.56
  -2   5  -8   -2.08    2.63
   2  -5   8    1.35    2.48
  -2  -5  -8   -1.83    2.07
  -2  -5  -8    3.96    3.39
   2   5   8   -1.10    2.53
  -3  -5  -8    0.87    2.22
  -3  -5  -8    4.73    3.27
  -3   5  -8    0.41    2.89
   3  -5   8    2.23    2.89
   3   5   8    3.58    3.28
  -4   5  -8   -0.49    3.01
  -4  -5  -8    3.91    2.70
   4  -5   8   -3.14    2.32
   4   5   8    1.16    2.90
  -4  -5  -8   -2.22    2.17
  -5   5  -8    9.20    4.91
  -5  -5  -8    9.13    4.70
   5  -5   8    3.51    3.59
  -5  -5  -8    1.88    2.53
   5   5   8    6.86    4.47
   6   5   8    6.33    3.52
  -6  -5  -8   -0.12    2.91
  -6   5  -8    3.25    3.31
   6  -5   8    7.78    3.92
  -6  -5  -8    7.35    3.36
 -14   0   9    2.14    3.03
 -14   0   9    0.01    2.85
  14   0  -9    6.98   18.61
  13   0  -9    1.53   17.57
 -13   0   9   -0.45    2.86
 -13   0   9   -4.91    2.54
 -12   0   9    1.50    2.88
 -12   0   9   -2.33    2.71
  12   0  -9    1.83   10.19
 -11   0   9   52.53    7.29
  11   0  -9   17.52   17.06
 -11   0   9   63.70    7.49
 -10   0   9   -0.07    2.24
  10   0  -9   -0.48   13.51
 -10   0   9    1.54    3.35
  -9   0   9   56.33    6.46
  -9   0   9   48.36    6.40
   8   0  -9    1.56   11.52
  -8   0   9    1.11    2.08
  -8   0   9   -0.56    2.51
  -7   0   9  158.41   10.24
  -7   0   9  171.41    9.63
  -6   0   9    0.87    1.92
  -6   0   9   -1.36    1.29
   6   0  -9   -9.87    8.45
   6   0  -9    1.44    2.33
  -5   0   9  215.66   10.11
   5   0  -9  226.10   12.30
  -5   0   9  209.50   11.76
   4   0  -9    4.38    7.79
   4   0  -9    2.31    2.90
  -4   0   9    0.26    1.12
  -4   0   9    0.33    1.32
   3   0  -9  992.23   41.55
  -3   0   9 1027.89   34.70
  -3   0   9  784.01   38.21
  -2   0   9    0.75    0.55
  -2   0   9   -0.90    1.53
   2   0  -9    0.22    2.33
  -2   0   9   -1.34    7.05
  -1   0   9 1422.87   52.51
   1   0  -9 1207.63   56.91
   0   0  -9   -0.52    2.21
   0   0   9   -1.44    7.68
   0   0   9    1.16    1.79
   1   0   9  454.43   19.98
  -1   0  -9  441.89   23.98
  -1   0  -9  436.62   16.99
  -2   0  -9    1.45    2.30
  -2   0  -9   -0.29    1.44
   2   0   9   -0.75    1.20
   2   0   9   -7.97    8.53
   3   0   9  250.73   12.59
  -3   0  -9  240.09   11.42
  -3   0  -9  254.36   16.83
   4   0   9    0.18    1.56
   4   0   9   -5.56   11.88
  -4   0  -9   -2.65    2.01
  -4   0  -9    0.19    2.10
  -5   0  -9 1549.55   68.73
   5   0   9 1439.34   59.45
  -5   0  -9 1554.70   58.04
  -6   0  -9   -1.56    3.16
   6   0   9   -4.96   11.00
   6   0   9    2.06    1.52
  -6   0  -9    0.10    3.05
   7   0   9   -3.26    7.16
  -7   0  -9   -2.23    3.27
   7   0   9    1.33    1.67
  -7   0  -9    3.29    3.93
  -8   0  -9   -0.73    3.72
  -8   0  -9   -0.79    3.51
   8   0   9  -10.02    8.21
  10   0   9   -4.36   11.57
 -10   0  -9    0.12    5.19
 -10   0  -9   -1.01    3.09
  11   0   9  -11.42   12.90
 -11   0  -9   26.26    6.24
 -12   0  -9    7.98    4.32
  12   0   9   -9.55   11.17
  13   0   9  -14.92   13.07
 -13   0  -9   38.12    7.22
  14  -1  -9   12.87   21.38
 -14   1   9    6.61    5.03
  14   1  -9   -0.61   18.47
 -14  -1   9   -0.77    3.50
 -14  -1   9    3.33    2.73
 -13   1   9   16.55    6.01
  13  -1  -9   17.23   21.05
 -13  -1   9    5.93    3.77
  13   1  -9   -2.59   17.90
 -13   1   9    3.33    3.41
 -13  -1   9    8.79    3.40
 -12   1   9    1.67    3.98
 -12  -1   9    0.96    3.48
  12   1  -9    1.01   11.86
 -12  -1   9   11.24    3.80
  12  -1  -9  -17.67   14.00
 -12   1   9    6.32    3.26
  11   1  -9    5.37   14.24
 -11   1   9   13.23    5.31
 -11   1   9    7.03    3.10
 -11  -1   9    7.73    4.01
 -11  -1   9    3.25    2.78
  11  -1  -9    5.33   15.11
 -10   1   9    4.38    2.41
  10  -1  -9    3.49   18.73
 -10  -1   9    1.10    2.40
 -10   1   9    0.05    4.09
  10   1  -9   -8.30   13.00
 -10  -1   9    2.32    2.39
   9   1  -9   12.58   17.86
  -9   1   9    9.87    5.14
  -9   1   9    9.53    2.96
  -9  -1   9   15.49    4.25
   9  -1  -9    3.37   14.16
  -9  -1   9   12.03    3.44
  -8  -1   9   73.15    6.10
  -8  -1   9   70.21    7.04
  -8   1   9   79.97    7.90
  -8   1   9   82.95    6.75
  -7   1   9    0.72    1.75
   7   1  -9    4.16   12.00
  -7   1   9    0.84    3.52
   7  -1  -9    2.32    1.95
  -7  -1   9    0.27    1.46
   7  -1  -9   -1.24   10.70
  -7  -1   9    0.93    1.62
  -6   1   9   51.89    5.02
   6  -1  -9   49.15    5.43
  -6   1   9   68.50    6.42
   6   1  -9   53.46    5.08
  -6  -1   9   51.65    4.64
  -6  -1   9   57.02    5.67
  -5   1   9    5.45    2.43
   5   1  -9   -2.07    7.80
  -5   1   9    0.49    2.31
   5  -1  -9    1.22    2.38
  -5  -1   9    2.25    1.49
   5   1  -9    1.97    1.72
  -5  -1   9    3.27    2.02
   5  -1  -9   -0.61    8.51
  -4  -1   9  130.61    8.61
  -4   1   9  129.85    7.65
   4  -1  -9  145.83    9.75
  -4  -1   9  144.70    7.77
   4   1  -9  120.09    9.69
  -4   1   9  146.19    8.98
  -3   1   9  244.20   13.06
   3  -1  -9  257.86   14.41
  -3  -1   9  243.99   12.67
  -3   1   9  239.53   10.96
   3   1  -9  234.94   15.63
  -2  -1   9    1.12    1.12
   2   1  -9    2.01    2.46
  -2  -1   9    0.55    8.50
  -2   1   9    0.16    1.73
  -2  -1   9    2.11    1.59
  -2   1   9    1.38    0.93
   2  -1  -9    2.73    3.29
  -1   1   9  982.68   39.01
  -1  -1   9  928.62   37.44
   1  -1  -9  912.80   41.76
  -1   1   9  952.43   34.99
   1   1  -9  937.98   36.75
   1   1  -9  888.62   45.46
   0   1  -9   39.77    3.78
   0   1   9   48.82    4.85
   0  -1   9   48.48    4.00
   0   1  -9   38.85    7.47
   0  -1  -9   46.90    6.46
  -1   1  -9    2.23    1.14
  -1  -1  -9    3.15    0.94
   1  -1   9   10.10   10.22
   1   1   9    2.81    1.82
  -1   1  -9    4.44    3.34
  -1  -1  -9    2.52    3.39
   1  -1   9    1.51    1.17
   1   1   9   -0.62    6.52
  -2   1  -9  154.55    8.49
   2  -1   9  133.23    7.91
  -2  -1  -9  135.20   10.59
  -2   1  -9  134.86   13.26
   2  -1   9  133.04    7.90
   2   1   9  142.47    9.29
  -2  -1  -9  145.22    6.86
  -3   1  -9    2.41    1.57
   3  -1   9   -1.03    9.54
   3   1   9    4.67    9.95
  -3  -1  -9    5.49    4.22
  -3   1  -9   -0.66    2.37
  -3  -1  -9    2.49    1.32
   3   1   9    3.97    2.29
   3  -1   9    2.45    1.60
  -4  -1  -9   14.59    5.22
   4  -1   9    7.30    1.96
   4   1   9   11.08    3.17
   4   1   9    1.33   13.06
  -4  -1  -9    8.21    2.23
  -4   1  -9    5.59    2.54
  -4   1  -9    8.28    4.60
  -5  -1  -9   10.67    5.29
  -5   1  -9    7.84    3.39
  -5  -1  -9    4.56    2.44
   5   1   9   11.02   16.10
   5   1   9    7.77    3.02
  -5   1  -9    8.84    4.60
   5  -1   9   -5.70    7.98
   6   1   9   -1.01   14.16
  -6  -1  -9   -1.60    4.35
   6  -1   9    4.09    8.76
  -6   1  -9    0.70    3.08
  -6   1  -9    2.29    3.39
  -6  -1  -9    0.56    2.40
   6   1   9    0.55    2.08
  -7  -1  -9    0.84    4.70
   7  -1   9    4.18    7.54
   7   1   9    3.87    2.32
  -7   1  -9    0.19    3.46
  -7   1  -9    2.06    3.72
   7   1   9   -3.25   12.20
  -7  -1  -9   -1.11    2.48
  -8   1  -9   58.57    8.54
  -8  -1  -9   53.13    8.70
  -8   1  -9   45.88    9.84
   8   1   9   38.72    5.55
  -8  -1  -9   52.11    5.68
  -9   1  -9   45.93    9.65
   9   1   9   42.95    6.12
  -9   1  -9   47.70    7.85
  -9  -1  -9   48.55    8.71
  -9  -1  -9   55.29    5.91
 -10  -1  -9   29.95    5.43
 -10   1  -9   23.91    7.56
 -10   1  -9   18.52    6.26
  11   1   9   -3.91   10.04
  11  -1   9   -6.17    9.63
 -11  -1  -9   31.59    5.56
 -11   1  -9   16.38    6.14
  12  -1   9   -8.08   11.74
 -12  -1  -9    7.26    2.87
  12   1   9  -11.10   11.00
 -12   1  -9    5.15    4.66
  14   2  -9    0.47   12.15
 -14   2   9   -0.62    4.76
 -14  -2   9    3.98    3.06
 -13  -2   9    1.60    2.15
 -13  -2   9   -4.97    3.16
  13   2  -9   -6.76   12.34
 -13   2   9    1.31    4.99
  13  -2  -9   -0.08   18.66
 -12  -2   9    8.37    4.50
  12   2  -9   24.95   18.74
 -12   2   9    4.03    5.65
 -12  -2   9    7.04    3.11
  12  -2  -9    1.25   15.09
  11  -2  -9   15.65   16.77
 -11   2   9    7.28    5.72
 -11  -2   9   10.68    4.93
  11   2  -9    7.86   19.28
 -11  -2   9   13.23    3.87
 -11   2   9    9.70    3.24
  10   2  -9    4.17   15.39
 -10   2   9    6.68    5.20
 -10  -2   9   13.59    4.77
 -10  -2   9    5.43    2.69
 -10   2   9   10.14    3.13
  10  -2  -9    7.52   15.01
   9  -2  -9    6.33   17.91
  -9   2   9   11.82    5.41
  -9   2   9    8.63    3.13
  -9  -2   9    7.62    4.12
  -9  -2   9   13.46    3.76
   9   2  -9   -7.73   14.14
   8  -2  -9   69.93    7.87
  -8  -2   9   64.47    7.12
  -8  -2   9   60.84    6.27
  -8   2   9   53.87    7.79
  -8   2   9   64.22    6.23
  -7   2   9   -2.16    2.52
  -7  -2   9    1.24    2.48
   7  -2  -9   -0.65    2.53
  -7   2   9    3.20    2.41
   7  -2  -9   -2.69   10.57
  -7  -2   9    0.40    1.47
   7   2  -9   20.42   15.64
  -6   2   9    8.08    3.06
   6   2  -9   -2.66    8.17
   6  -2  -9    2.68   10.59
  -6   2   9    7.08    2.58
  -6  -2   9    8.56    2.77
  -6  -2   9    7.85    3.21
   6  -2  -9    2.68    2.69
   5   2  -9    3.19    2.99
   5   2  -9    3.27    7.32
  -5  -2   9    9.15    2.72
   5  -2  -9    3.74    9.05
   5  -2  -9    4.95    3.20
  -5  -2   9    5.75    2.81
  -5   2   9    9.25    2.90
  -5   2   9    4.22    2.23
   4  -2  -9    2.21    2.56
  -4  -2   9    1.63    2.09
  -4   2   9   -0.20    1.14
   4   2  -9   -4.61    8.51
  -4   2   9   -1.04    1.60
  -4  -2   9    1.67    1.58
  -4  -2   9    1.12    1.50
   4  -2  -9   -1.76    8.27
  -3   2   9   66.25    5.83
  -3  -2   9   53.96    5.69
   3  -2  -9   72.90    7.63
  -3   2   9   72.80    6.46
  -3  -2   9   72.61    5.55
  -3  -2   9   72.49    6.19
   2  -2  -9  196.17   13.08
  -2  -2   9  180.34   11.01
  -2   2   9  184.78   10.95
  -2  -2   9  196.21   10.96
  -2  -2   9  195.13   10.86
  -2   2   9  187.96   11.72
   1   2  -9   13.26    3.27
  -1   2   9   25.19    3.89
   1  -2  -9   22.09    4.91
  -1   2   9   29.93    4.72
  -1  -2   9   28.24    3.79
  -1  -2   9    0.97   11.41
  -1  -2   9   20.63    3.20
   0  -2  -9   55.37    7.12
   0  -2   9   49.77    4.88
   0  -2   9   47.13    4.11
   0   2   9   55.33    6.47
   0   2  -9   52.43    5.66
   0  -2  -9   49.99    4.05
   1  -2   9   58.26    5.40
  -1  -2  -9   51.16    4.14
   1  -2   9   59.68    4.27
   1  -2   9   12.77   17.17
   1   2   9   52.87    6.54
  -1   2  -9   54.50    6.50
  -1  -2  -9   57.36    6.86
   2   2   9   81.19    7.50
   2  -2   9   91.78    5.24
  -2  -2  -9   89.05    5.92
  -2   2  -9   76.23    7.35
  -2  -2  -9   79.50    8.54
   2  -2   9   87.41    7.02
   3  -2   9   -6.02    9.08
   3   2   9    4.87    6.76
  -3   2  -9    0.60    1.25
   3  -2   9   -0.64    1.31
  -3  -2  -9   -0.17    1.01
   3   2   9   -0.12    1.97
  -3  -2  -9   -1.35    3.65
   4  -2   9   -0.02    9.24
  -4  -2  -9   10.37    5.20
   4  -2   9    8.55    2.97
   4   2   9  -10.97    8.53
  -4   2  -9   10.69    3.28
   4   2   9   12.71    3.99
  -4  -2  -9   10.58    2.51
  -5   2  -9  176.12   12.17
  -5   2  -9  159.53   17.18
  -5  -2  -9  190.33   13.88
  -5  -2  -9  181.01   10.51
   5   2   9  181.64   12.56
  -6  -2  -9    6.90    2.39
  -6  -2  -9    3.84    4.78
   6   2   9    8.59    3.19
   6  -2   9   -3.41    9.46
   6   2   9   -2.30   11.51
  -6   2  -9    0.96    2.37
  -6   2  -9    7.54    5.65
  -7   2  -9   20.36    7.25
   7   2   9   16.31    4.71
   7  -2   9   10.16   13.55
  -7  -2  -9   21.59    6.21
  -7  -2  -9   23.05    4.32
  -7   2  -9   15.13    4.68
  -8  -2  -9   22.50    4.46
  -8   2  -9   24.61    8.88
  -8  -2  -9   24.78    6.51
  -8   2  -9   16.58    5.26
   8  -2   9    4.53   11.04
   8   2   9   20.26    5.05
  -9   2  -9   -1.82    3.20
   9  -2   9    1.45   10.33
   9   2   9   -1.50    2.14
  -9  -2  -9   -1.63    3.75
  -9   2  -9    2.84    4.51
  -9  -2  -9    4.52    2.46
 -10   2  -9   16.45    5.91
  10  -2   9    6.59   14.36
  10   2   9   27.39    5.89
 -10  -2  -9   26.70    5.22
 -10   2  -9   17.20    8.31
 -11  -2  -9   10.46    3.42
 -11   2  -9    2.86    4.32
 -11   2  -9    7.61    5.46
  11   2   9    5.61    3.36
  11  -2   9    3.34   11.33
 -12   2  -9   -2.81    4.47
 -12  -2  -9    6.25    3.04
  12  -2   9    6.83   14.08
  12   3  -9    8.07    4.48
 -12  -3   9    5.28    2.62
 -12   3   9   -2.97    4.40
  12  -3  -9    8.16   18.61
  11   3  -9    0.67    3.51
 -11   3   9   -3.61    4.16
 -11  -3   9    0.92    2.41
  11  -3  -9   12.25   16.51
  10  -3  -9   -4.47   16.17
 -10  -3   9    3.68    2.48
 -10   3   9   -0.33    3.86
  -9  -3   9    1.59    2.47
   9   3  -9   -1.91   15.96
   9  -3  -9   14.42   17.00
  -9   3   9    1.90    3.51
   8  -3  -9    2.33    3.12
  -8   3   9    1.52    2.87
  -8  -3   9    2.84    3.48
   8  -3  -9    6.39   11.47
   8   3  -9   -8.46   14.50
  -8   3   9   -1.35    2.32
  -8  -3   9    0.36    2.13
  -7  -3   9   40.12    6.82
   7  -3  -9   42.11    7.56
  -7   3   9   42.02    6.09
  -7   3   9   27.09    5.85
  -7  -3   9   54.85    8.13
   6  -3  -9   94.72    9.77
  -6   3   9   78.15    8.02
  -6  -3   9   99.88    9.33
  -6   3   9   88.15    8.07
  -6  -3   9  109.05    9.59
  -5  -3   9    7.61    3.32
  -5   3   9    8.36    3.04
   5  -3  -9   10.83    4.25
   5  -3  -9   -0.15    7.38
  -5  -3   9    8.33    3.68
  -5  -3   9    7.18    2.43
   5   3  -9   -2.39    7.89
  -5   3   9   14.52    3.77
  -4  -3   9    5.66    3.30
   4  -3  -9   -2.10    1.96
  -4   3   9    2.09    2.16
  -4  -3   9   -0.52    1.77
  -4  -3   9    3.53    1.94
  -4   3   9    2.55    2.41
   4   3  -9   -4.49    7.46
   4  -3  -9   -0.17    8.14
   3  -3  -9    3.50    3.31
  -3   3   9    0.27    2.50
  -2  -3   9   -0.23   16.56
  -2  -3   9   13.03    3.32
  -2   3   9   13.59    4.03
  -2  -3   9   12.65    3.73
  -2  -3   9   21.78    4.41
   2  -3  -9    9.35    4.41
  -2   3   9   15.87    4.29
  -1  -3   9    4.22    2.57
   1   3  -9    5.58    2.98
  -1  -3   9    6.44    2.53
  -1   3   9    6.43    3.08
  -1   3   9    5.79    2.72
   1  -3  -9    7.36    3.69
  -1  -3   9   35.95   17.37
   0   3  -9    0.14    1.67
   0   3   9    1.88    1.72
   0  -3  -9   -0.57    3.07
   0  -3   9    8.76   19.02
   0  -3   9    1.05    1.54
   0   3   9    2.79    2.62
   1  -3   9   25.99   21.68
   1   3   9   18.03    4.59
   1  -3   9   16.31    3.72
  -1   3  -9   18.53    5.09
  -1  -3  -9   17.59    3.30
  -1  -3  -9   16.08    5.45
  -2  -3  -9  140.20    9.07
   2  -3   9  139.85   10.21
   2  -3   9   70.78   25.56
  -2  -3  -9  140.78   11.81
   2   3   9  133.57   10.99
  -2   3  -9  133.93   11.80
   3   3   9   81.51    8.68
  -3  -3  -9   98.33    9.81
   3  -3   9   86.53    8.10
  -3   3  -9   98.12    9.89
  -3  -3  -9   83.15    6.98
  -4  -3  -9    1.80    2.05
  -4   3  -9   -1.76    1.49
   4   3   9   -0.84    2.38
  -4  -3  -9    5.19    4.15
   4  -3   9    2.06    2.46
   4  -3   9   12.81   24.81
  -5   3  -9   17.27    4.79
   5  -3   9   19.87    4.78
   5  -3   9   28.48   25.40
  -5  -3  -9   20.17    4.27
  -5  -3  -9   22.33    6.15
   5   3   9   20.20    5.40
  -6  -3  -9    1.86    1.93
   6   3   9    3.15    2.82
   6  -3   9    0.47   20.18
  -6   3  -9    1.09    1.97
   6  -3   9    0.28    2.01
  -6  -3  -9    1.52    3.86
  -7   3  -9    4.77    3.28
  -7  -3  -9    4.33    4.23
  -7  -3  -9    8.08    3.31
   7  -3   9    6.38    3.26
   7   3   9   12.68    4.51
   7  -3   9    6.26   21.12
   8  -3   9   17.57   19.73
   8   3   9   -0.78    2.63
  -8  -3  -9   -2.80    3.58
  -8   3  -9   -2.64    2.38
   8  -3   9   -3.56    2.19
  -8  -3  -9   -4.93    1.44
   9   3   9   -0.11    2.92
   9  -3   9   10.15   18.74
  -9  -3  -9    5.06    2.78
  -9   3  -9    5.24    4.09
  -9   3  -9   12.51    6.62
 -10  -3  -9    1.33    2.54
  10  -3   9    2.94   19.56
  10   3   9    2.94    3.14
 -10   3  -9   -1.20    3.27
 -10   3  -9   -1.23    4.69
 -11   3  -9    5.28    5.79
 -11   3  -9   -1.97    4.13
 -11  -3  -9    5.50    2.91
 -11  -4   9    3.67    2.96
  10   4  -9   -2.06    2.31
 -10  -4   9   -0.17    2.82
 -10   4   9   -4.95    2.96
  -9  -4   9    3.24    3.22
  -9   4   9   -0.04    3.50
   9   4  -9    2.95    2.50
   9  -4  -9    1.26    4.67
   8  -4  -9    2.61    4.40
  -8   4   9    1.91    3.20
  -8  -4   9   -0.93    2.62
   8   4  -9    2.34    3.33
   7   4  -9    7.42    3.61
  -7   4   9    4.41    3.50
   7  -4  -9    7.77    4.09
  -7  -4   9    8.21    3.70
   6  -4  -9   11.65    4.73
   6   4  -9    8.48    3.70
  -6   4   9    7.37    3.53
  -6  -4   9    2.74    2.98
  -6   4   9    2.72    3.19
  -5  -4   9   12.89    4.69
  -5   4   9   18.94    4.87
   5  -4  -9   15.71    4.92
   5   4  -9   18.95    5.29
  -5   4   9   14.02    5.37
   4   4  -9   10.19    3.78
  -4  -4   9   10.63    4.03
   4  -4  -9   12.21    4.73
  -4  -4   9   10.75    3.11
  -4   4   9   16.05    4.26
  -4   4   9   16.38    5.64
   3   4  -9    2.00    2.13
  -3   4   9    4.81    2.78
  -3   4   9    7.40    4.01
  -3  -4   9    1.72    1.91
   3  -4  -9    2.83    3.26
  -3  -4   9    2.52    2.77
  -2  -4   9    8.96    2.97
  -2   4   9   11.15    4.06
   2   4  -9   10.26    3.54
  -2   4   9   11.96    4.73
   2  -4  -9   13.68    4.62
   1   4  -9   60.16    9.08
  -1   4   9   76.35    9.88
  -1   4   9   91.43    9.11
   1  -4  -9   78.28    8.85
  -1  -4   9   69.83    7.03
   0   4  -9    1.17    2.00
   0  -4  -9    1.61    2.79
   0  -4   9    1.07    1.86
   0   4   9    0.72    2.38
   0   4   9    0.58    2.44
  -1  -4  -9    4.77    3.47
  -1   4  -9    5.05    3.21
   1  -4   9   11.21   23.94
   1   4   9    4.03    2.88
  -1  -4  -9    2.31    1.86
   1  -4   9   -1.80    1.68
   2   4   9    1.36    2.56
  -2  -4  -9   -0.14    1.64
   2  -4   9    2.98    2.52
  -2  -4  -9    3.78    3.35
   2  -4   9    6.47   23.16
  -2   4  -9    4.69    3.44
   3  -4   9  -20.76   24.88
  -3   4  -9   40.70    9.06
   3   4   9   32.39    7.14
  -3  -4  -9   43.29    6.35
   3  -4   9   30.94    6.03
  -3  -4  -9   38.34    7.27
  -4  -4  -9    0.88    3.00
   4   4   9    2.12    2.94
   4  -4   9   13.21   27.66
  -4  -4  -9    2.51    2.11
   4  -4   9    2.61    2.74
  -4   4  -9    4.51    3.49
   5  -4   9   -1.77   27.65
   5  -4   9   10.10    4.14
  -5  -4  -9   14.17    4.75
  -5  -4  -9   10.76    3.41
  -5   4  -9    7.26    3.58
   5   4   9   15.95    5.58
   6  -4   9   16.23    4.83
   6   4   9   14.13    5.01
   6  -4   9    8.18   30.26
  -6  -4  -9   19.32    4.69
  -6   4  -9   12.58    4.69
  -6  -4  -9   18.89    5.32
  -7  -4  -9   25.22    5.63
  -7  -4  -9    9.99    4.16
   7  -4   9   14.25   31.41
   7  -4   9   11.24    4.42
  -7   4  -9    9.76    3.91
   7   4   9   15.56    5.84
   8  -4   9    5.37    3.66
   8  -4   9   18.99   32.08
  -8  -4  -9    4.19    3.10
  -8   4  -9   12.67    5.34
   8   4   9   13.94    5.43
   9  -4   9   -5.32   33.14
  -9   4  -9    3.20    3.31
  -9  -4  -9    0.28    2.47
   9   4   9    0.57    3.47
   9  -4   9   -2.76    3.15
   7  -5  -9    5.01    4.54
   7   5  -9   -4.66    2.43
  -7   5   9    2.14    3.06
  -7  -5   9   -0.41    2.81
   6  -5  -9    8.18    4.96
   6   5  -9    8.24    3.91
  -6   5   9   22.26    6.83
  -6  -5   9   15.78    5.72
  -5  -5   9   -0.55    2.83
  -5   5   9    2.38    3.87
   5   5  -9    3.19    2.54
   5  -5  -9   -5.34    2.47
  -4   5   9    7.99    3.48
  -4  -5   9    3.52    2.18
   4  -5  -9    5.30    3.83
  -4  -5   9    1.76    2.70
  -4   5   9    1.52    4.13
   3  -5  -9    2.03    3.27
  -3  -5   9    4.37    2.57
  -3   5   9    0.30    2.85
  -3   5   9    2.79    3.94
  -2   5   9   -0.06    3.28
  -2  -5   9    0.52    1.99
   2  -5  -9    3.91    3.61
   2   5  -9    3.62    2.83
  -2   5   9    5.05    3.24
  -1   5   9   11.40    4.31
  -1   5   9    6.02    4.28
   1  -5  -9    5.90    3.95
  -1  -5   9    9.53    3.47
   1   5  -9    6.61    3.21
   0   5   9   24.37    6.34
   0  -5   9   22.81    5.11
   0   5  -9   31.16    7.99
   0   5   9   26.46    6.50
   0  -5  -9   24.94    6.46
  -1  -5  -9    3.32    3.78
   1   5   9    2.52    3.43
  -1   5  -9    4.46    3.49
   1  -5   9    3.22    2.82
   1   5   9    0.83    2.69
   2   5   9   40.78    7.99
  -2  -5  -9   51.56    8.61
  -2   5  -9   51.36   10.84
   2  -5   9   44.09    7.49
   3  -5   9    0.96    2.69
  -3  -5  -9   -0.15    2.45
  -3   5  -9    1.52    3.46
  -3  -5  -9   -2.91    2.07
   3   5   9    4.78    3.33
  -4  -5  -9    4.95    2.67
  -4   5  -9    6.91    4.57
   4  -5   9    4.72    3.06
  -4  -5  -9    0.45    3.08
   4   5   9   10.03    4.56
  -5  -5  -9    0.76    2.60
   5   5   9    6.29    3.52
   5  -5   9    1.97    3.02
  -5   5  -9    0.66    2.82
   6  -5   9   13.87    4.91
  -6   5  -9   14.98    6.04
  -6  -5  -9   21.34    5.61
  -6  -5  -9   18.44    5.19
  14   0 -10    7.57   16.62
 -14   0  10    2.64    3.32
 -14   0  10    8.70    3.32
  13   0 -10   -6.61   10.15
 -13   0  10    1.26    2.93
 -13   0  10    1.46    2.91
 -12   0  10    3.13    2.71
  12   0 -10    5.39   13.42
 -12   0  10    1.73    2.74
 -11   0  10    1.38    2.84
 -11   0  10   -1.19    2.33
  11   0 -10    1.76   12.48
 -10   0  10    3.03    2.51
  10   0 -10   -4.83   10.76
 -10   0  10    2.69    3.26
   9   0 -10  -14.17   10.15
  -9   0  10   -1.30    1.90
  -9   0  10   -0.18    2.72
   8   0 -10    6.39   14.39
  -8   0  10   20.64    4.28
  -8   0  10   20.53    3.91
  -7   0  10   -0.04    1.62
   7   0 -10    0.19   12.17
  -7   0  10    3.15    2.26
   6   0 -10    1.95    2.72
   6   0 -10   -2.78    9.23
  -6   0  10   -0.22    1.72
  -6   0  10    2.65    1.88
  -5   0  10   -1.04    1.12
   5   0 -10    1.08    2.89
   5   0 -10   -0.98    7.04
  -5   0  10    0.29    1.49
  -4   0  10   83.70    6.60
  -4   0  10   89.97    4.83
   4   0 -10   81.32    7.39
   3   0 -10   -0.33    2.62
  -3   0  10   -2.08    1.60
  -3   0  10    0.46    0.65
  -3   0  10    7.11    8.23
   2   0 -10  288.37   17.99
  -2   0  10  364.50   16.95
   1   0 -10    1.14    2.77
  -1   0  10    2.20    8.06
  -1   0  10    1.29    1.81
   0   0 -10  350.48   19.94
   0   0  10  316.62   16.08
  -1   0 -10   -1.48    2.29
  -1   0 -10    0.78    1.22
   1   0  10    0.22    1.49
   1   0  10    1.76    8.00
   2   0  10    6.91    2.42
   2   0  10   -6.17    9.75
  -2   0 -10    6.70    3.61
  -2   0 -10   10.37    2.12
  -3   0 -10    2.37    2.01
   3   0  10   -0.47    1.52
  -3   0 -10   -1.01    2.06
   3   0  10    2.62   11.67
  -4   0 -10   67.41    5.47
   4   0  10   53.86    5.24
  -4   0 -10   68.31    9.22
  -5   0 -10    1.85    2.87
  -5   0 -10   -1.45    2.62
   5   0  10    0.71    1.88
   6   0  10   57.31    5.55
  -6   0 -10   68.62   10.03
  -7   0 -10   -3.56    3.65
  -7   0 -10    2.19    3.97
   7   0  10   -9.17    9.17
  -8   0 -10   11.00    4.19
  -8   0 -10   16.34    6.52
   8   0  10    0.73   12.15
  -9   0 -10    1.62    3.55
   9   0  10    0.79   11.54
  -9   0 -10   -9.75    3.95
 -11   0 -10    6.99    3.96
  11   0  10   -9.32   10.69
  12   0  10   -3.12   10.72
 -12   0 -10    3.90    3.30
 -14  -1  10    3.70    3.92
 -14   1  10    2.27    3.99
  14  -1 -10   -2.05   19.87
 -14  -1  10    2.18    2.73
  14   1 -10  -14.18   17.39
 -13  -1  10    6.78    2.81
 -13   1  10    5.29    3.40
 -13   1  10    8.88    4.71
  13  -1 -10   -1.30   17.73
  13   1 -10    3.50   12.89
 -13  -1  10    0.58    3.09
 -12   1  10   11.84    5.06
 -12   1  10    2.65    2.79
  12   1 -10   -8.82   12.98
  12  -1 -10    0.45   15.17
 -12  -1  10    7.42    3.15
 -12  -1  10   13.30    4.71
 -11  -1  10   37.77    5.50
  11   1 -10    3.21   14.71
 -11   1  10   37.34    5.92
  11  -1 -10   -3.12   16.09
 -11  -1  10   45.00    7.40
 -11   1  10   36.88    6.82
 -10  -1  10    2.69    2.75
 -10   1  10   -2.07    3.78
 -10  -1  10    1.04    2.22
  10  -1 -10    5.69   18.09
 -10   1  10    1.41    2.13
  10   1 -10    1.56   16.50
   9  -1 -10   10.33   17.31
  -9   1  10    6.47    2.84
  -9   1  10   -0.82    3.64
   9   1 -10   -2.64   12.84
  -9  -1  10    6.73    3.12
  -9  -1  10    4.90    2.46
  -8  -1  10   61.46    6.44
  -8   1  10   68.59    7.53
  -8  -1  10   57.47    5.35
  -8   1  10   55.52    5.68
  -7  -1  10    0.91    1.68
  -7   1  10    7.41    2.59
   7   1 -10   -5.64   11.07
  -7  -1  10    3.04    2.15
   7  -1 -10    4.68   13.29
  -7   1  10    2.79    3.50
   7  -1 -10    3.49    2.83
   6  -1 -10   24.33    4.62
  -6  -1  10   23.54    3.49
  -6   1  10   28.66    4.61
   6   1 -10   28.33    4.56
  -6  -1  10   28.84    4.73
  -6   1  10   28.94    4.38
  -5   1  10  146.15    8.62
  -5  -1  10  138.38    9.42
  -5   1  10  150.35    9.92
  -5  -1  10  144.81    8.39
   5  -1 -10  148.75   10.39
   5   1 -10  139.53    9.96
   4  -1 -10    4.73    3.37
   4  -1 -10   -2.27    6.81
  -4  -1  10    3.55    1.40
   4   1 -10    3.76    9.68
  -4   1  10    5.19    2.40
  -4  -1  10    3.76    2.07
  -4   1  10    2.40    2.13
   4   1 -10    2.05    1.99
   3  -1 -10  255.14   15.38
  -3  -1  10  263.11   13.74
  -3   1  10  259.46   11.42
  -3   1  10  264.78   14.21
   3   1 -10  272.27   17.18
  -3  -1  10  276.23   12.88
  -2  -1  10  354.33   14.43
  -2  -1  10  320.45   15.23
  -2   1  10  297.77   12.45
   2  -1 -10  311.45   17.79
   2   1 -10  295.24   19.65
  -2   1  10  295.29   15.89
  -1  -1  10    0.96    1.39
   1  -1 -10   -1.34    3.22
  -1  -1  10    2.46    6.66
   1   1 -10    0.52    1.84
  -1   1  10   -2.47    5.76
  -1   1  10    1.75    1.87
   1   1 -10   -0.01    1.03
   0   1 -10   40.52    7.84
   0   1  10   38.69    2.71
   0   1  10   31.98    4.69
   0   1 -10   31.53    3.37
   0  -1 -10   37.37    6.41
  -1   1 -10  382.79   24.81
   1   1  10  388.03   18.45
  -1   1 -10  368.97   16.62
  -1  -1 -10  356.64   14.71
  -1  -1 -10  374.94   20.78
   2   1  10  144.82    9.39
   2  -1  10  112.65    7.81
  -2   1 -10  140.50    8.28
  -2  -1 -10  146.33   11.44
  -2   1 -10  126.27   13.26
  -2  -1 -10  146.45    6.79
   3  -1  10  302.22   15.55
  -3  -1 -10  349.84   20.46
  -3   1 -10  384.21   25.30
  -3   1 -10  351.04   16.67
   3   1  10  364.48   18.13
  -3  -1 -10  357.94   14.82
   4   1  10    3.09    2.28
  -4  -1 -10    2.94    4.03
   4  -1  10   -5.11    9.77
  -4   1 -10   -0.37    2.01
   4  -1  10    1.67    1.43
  -4  -1 -10    2.14    1.48
  -4   1 -10    1.69    2.59
   4   1  10    3.23   12.80
  -5  -1 -10    7.44    2.46
  -5   1 -10    8.93    3.55
  -5   1 -10    9.08    4.70
   5  -1  10   -0.68    6.66
  -5  -1 -10    6.84    5.27
   5   1  10   -6.43   13.76
   5   1  10    4.25    2.41
   6   1  10    2.62    2.36
  -6   1 -10    5.92    4.19
   6   1  10    2.46    2.39
  -6   1 -10    2.83    3.59
  -6  -1 -10    2.26    5.20
   6  -1  10   -1.76    5.48
  -6  -1 -10    6.94    2.90
   6   1  10    0.06   12.88
  -7  -1 -10  205.54   11.84
   7   1  10  188.91   12.71
  -7  -1 -10  201.09   15.97
  -7   1 -10  204.04   18.60
  -8   1 -10   34.11    6.91
  -8   1 -10   29.20    8.57
  -8  -1 -10   30.19    7.99
  -8  -1 -10   27.99    4.79
   8   1  10   27.98    5.07
  -9   1 -10    1.69    4.28
  -9  -1 -10    2.66    2.42
   9   1  10   -5.67    9.23
  -9   1 -10    3.58    4.61
   9   1  10   -0.09    2.44
  -9  -1 -10    3.81    5.63
   9  -1  10    1.25    9.18
 -10   1 -10    5.20    5.18
 -10  -1 -10   22.51    4.76
 -10   1 -10   10.69    5.05
  10   1  10   -5.83    9.35
  10  -1  10   -7.66    8.00
  11  -1  10  -10.65    8.92
  11   1  10   -5.45    9.11
 -11  -1 -10    3.99    2.63
 -11   1 -10    4.33    4.51
  12  -1  10   -6.60    8.48
 -12  -1 -10    4.60    2.51
  12   1  10   -5.74   10.07
 -12   1 -10    9.65    4.98
  13   2 -10   15.46   14.90
 -13  -2  10    3.27    2.00
 -13  -2  10    2.02    3.31
  13  -2 -10   -3.27   17.60
 -13   2  10   -0.44    4.31
 -12  -2  10    5.17    4.32
  12  -2 -10    4.73   17.23
  12   2 -10    1.65   17.05
 -12  -2  10    2.98    2.30
 -12   2  10   -3.22    4.54
 -11  -2  10    2.34    1.99
  11  -2 -10   -4.96   13.49
 -11   2  10   -0.08    4.68
  11   2 -10    2.95   15.13
 -11  -2  10    8.64    3.83
 -11   2  10   -0.63    2.08
 -10  -2  10   53.94    8.68
 -10  -2  10   37.56    5.83
 -10   2  10   36.53    7.72
 -10   2  10   45.40    5.92
  -9  -2  10   60.75    8.59
  -9  -2  10   56.58    6.70
  -9   2  10   44.45    5.97
  -9   2  10   55.11    8.11
  -8  -2  10    2.09    2.59
  -8   2  10    1.49    3.91
   8  -2 -10    4.20   14.06
   8   2 -10   -3.07   13.98
  -8  -2  10    2.41    2.17
  -8   2  10    0.40    2.09
   8  -2 -10    5.31    2.96
  -7   2  10   64.82    6.78
  -7   2  10   47.07    6.62
   7  -2 -10   55.62    7.31
  -7  -2  10   56.89    5.80
  -7  -2  10   63.87    7.91
  -6   2  10   87.96    7.73
   6  -2 -10   88.09    8.63
  -6   2  10  104.65    8.30
  -6  -2  10  126.99    8.74
  -6  -2  10   94.62    8.38
  -5  -2  10   30.01    5.14
   5   2 -10   34.29    7.03
  -5  -2  10   22.93    4.38
   5  -2 -10   30.80    5.63
  -5   2  10   21.00    3.89
  -5   2  10   31.70    5.21
  -4   2  10    0.25    2.02
   4   2 -10    3.80    3.02
   4  -2 -10   -0.96    3.24
  -4  -2  10    0.29    1.87
   4  -2 -10    4.88    9.82
  -4  -2  10    3.57    2.17
  -4   2  10    1.97    1.47
  -3  -2  10    3.85    2.03
  -3  -2  10    2.06    9.90
   3   2 -10    2.77    2.67
   3  -2 -10    2.18    3.49
  -3  -2  10    2.55    2.06
   3  -2 -10   -0.65    6.48
  -3   2  10    4.05    2.44
  -3   2  10    5.20    1.74
  -2   2  10  121.69    8.27
   2  -2 -10  127.59   10.76
  -2  -2  10  125.85    8.36
  -2   2  10  116.94    9.29
  -2  -2  10  168.76   10.01
  -1  -2  10   18.21    3.17
  -1  -2  10   -2.67   10.13
   1   2 -10   21.06    4.20
  -1   2  10   20.78    4.33
   1  -2 -10   19.23    5.19
  -1   2  10   19.59    3.57
  -1  -2  10   22.89    3.74
   0   2  10    0.13    1.83
   0   2 -10    0.76    1.38
   0   2  10    2.25    5.58
   0  -2  10    0.66   12.21
   0  -2  10    0.11    1.23
   0  -2  10    0.48    1.59
   0  -2 -10    1.29    3.70
   1  -2  10   40.27    4.54
  -1  -2 -10   30.17    6.34
   1   2  10   35.16    5.73
  -1  -2 -10   28.96    3.04
  -1   2 -10   31.59    5.26
   1  -2  10   33.04    3.33
  -2   2 -10  139.40   10.41
  -2  -2 -10  152.58   12.19
   2   2  10  144.08   10.70
  -2  -2 -10  151.25    8.35
  -3   2 -10    0.43    4.06
   3   2  10    1.10    2.12
  -3   2 -10    1.28    1.26
   3   2  10   14.85    8.31
   3  -2  10    7.31   12.54
  -3  -2 -10    0.25    4.56
  -3  -2 -10    1.07    1.20
  -4  -2 -10   12.80    2.75
   4   2  10   15.66    4.31
  -4   2 -10    9.32    6.06
  -4   2 -10   12.13    3.40
  -4  -2 -10   27.14    6.67
   4  -2  10   -2.04   11.26
  -5  -2 -10    0.73    4.56
  -5  -2 -10    0.46    1.63
   5  -2  10    8.00   13.65
   5   2  10    7.09   11.72
  -5   2 -10   -0.23    1.49
   5   2  10   -1.75    2.05
  -5   2 -10   -3.57    2.89
   6   2  10   -0.96   11.35
   6  -2  10    3.65   11.84
   6   2  10    4.28    3.06
  -6   2 -10    5.39    4.84
  -6  -2 -10    6.39    2.50
  -6   2 -10    1.30    2.36
  -6  -2 -10   10.77    5.76
  -7   2 -10   88.69    9.06
  -7   2 -10   76.16   13.86
  -7  -2 -10  103.28    7.96
  -7  -2 -10  113.18   11.12
   7   2  10   80.03    8.41
  -8   2 -10   29.48    6.83
   8   2  10   35.95    6.21
  -8  -2 -10   53.85    8.61
  -8  -2 -10   47.56    6.00
  -8   2 -10   56.24   11.96
   9  -2  10   10.20   11.80
  -9   2 -10    7.10    4.49
   9   2  10   12.55    4.19
  -9  -2 -10   16.36    3.99
  -9   2 -10    8.22    6.05
  -9  -2 -10   16.06    6.50
 -10   2 -10    0.02    4.03
 -10  -2 -10    5.50    2.64
 -10   2 -10    0.26    5.04
  10   2  10    0.81    2.93
  10  -2  10   -0.87   10.59
 -11   2 -10   -5.41    4.03
  11   2  10    0.98    2.77
  11  -2  10    0.59   11.23
 -11  -2 -10    6.24    2.96
 -11   2 -10    3.81    5.40
  12  -3 -10    5.85   18.24
 -12   3  10   -3.66    4.42
  12   3 -10   -2.75    3.17
 -12  -3  10   -3.29    1.62
 -11   3  10   -1.54    4.39
  11  -3 -10   10.61   17.04
 -11  -3  10    2.61    2.55
 -10  -3  10    0.19    2.14
 -10  -3  10   -7.15    3.09
 -10   3  10   -2.56    3.43
  10   3 -10    5.34   19.45
  10  -3 -10   25.17   18.84
  -9   3  10   10.41    3.47
  -9   3  10    8.49    4.76
   9  -3 -10    7.56   13.89
  -9  -3  10   13.74    5.13
  -9  -3  10   10.62    3.73
   9   3 -10    7.56   17.49
  -8   3  10    2.72    2.55
  -8   3  10    2.93    3.17
   8  -3 -10    1.84   12.67
  -8  -3  10    6.14    3.77
   8   3 -10   -2.25   13.99
   8  -3 -10    1.17    2.49
  -8  -3  10    3.56    2.42
  -7  -3  10   60.24    8.35
  -7   3  10   52.02    7.35
  -7  -3  10   63.65    8.40
   7  -3 -10   53.56    8.30
  -7   3  10   60.74    6.63
  -6  -3  10    1.73    2.40
   6  -3 -10   -0.78    2.32
   6  -3 -10    2.27    9.48
  -6   3  10    2.22    2.27
   6   3 -10   -2.05    9.46
  -6   3  10   -0.44    1.63
  -6  -3  10    1.92    2.93
   5  -3 -10    9.24    4.20
  -5  -3  10    8.22    2.60
   5   3 -10   -2.29    6.60
  -5   3  10    5.09    2.64
  -5   3  10    6.47    3.17
   5  -3 -10   10.53   10.34
  -5  -3  10   11.07    4.32
  -5  -3  10   10.11    3.65
  -4   3  10   56.16    7.40
  -4  -3  10   62.45    5.84
   4  -3 -10   71.37    8.93
  -4  -3  10   60.23    7.71
  -4  -3  10   61.69    6.82
  -4   3  10   68.10    7.11
  -3  -3  10  127.69    9.29
   3  -3 -10  123.96   11.51
  -3  -3  10  147.08   10.41
  -3   3  10  151.23   11.09
  -3  -3  10  136.10   10.47
  -3   3  10  131.35   10.74
  -2  -3  10    0.86    2.47
   2  -3 -10    2.61    3.22
  -2  -3  10   18.78   19.16
  -2   3  10    2.76    2.23
  -2  -3  10    1.11    1.63
  -2  -3  10    1.04    2.02
  -2   3  10   -1.09    1.65
   1  -3 -10   -0.69    3.00
  -1  -3  10   12.68   16.84
  -1   3  10    1.57    1.80
  -1  -3  10   -0.03    1.98
   1   3 -10    1.22    1.78
  -1  -3  10    1.67    1.68
  -1   3  10    3.90    2.48
   0  -3 -10   37.07    7.21
   0   3  10   36.74    5.64
   0   3  10   56.20    7.68
   0  -3  10   25.40    4.51
   0   3 -10   38.71    6.79
   1   3  10   23.09    5.31
  -1  -3 -10   29.35    6.78
  -1  -3 -10   23.82    4.06
   1  -3  10   15.48   22.37
  -1   3 -10   14.70    4.65
   1  -3  10   21.56    4.36
  -2  -3 -10  201.37   11.82
  -2   3 -10  206.74   15.46
   2  -3  10  210.91   13.64
   2   3  10  209.10   14.67
  -2  -3 -10  220.87   15.63
   3  -3  10   27.49   26.36
  -3  -3 -10   24.89    4.35
  -3   3 -10   24.38    6.04
   3  -3  10   26.91    5.14
   3   3  10   23.41    5.76
  -3  -3 -10   22.19    6.17
   4   3  10   40.67    7.07
   4  -3  10    3.43   21.86
  -4  -3 -10   44.89    7.97
  -4   3 -10   39.24    7.13
   4  -3  10   52.02    7.00
  -4  -3 -10   48.14    6.02
  -5  -3 -10  122.02    9.10
  -5  -3 -10  118.02   11.28
   5   3  10   96.93   10.08
   5  -3  10  116.25   10.08
  -5   3 -10  103.34   10.23
   6   3  10    1.46    2.81
  -6  -3 -10    1.74    3.66
   6  -3  10   17.86   24.47
   6  -3  10   -2.31    2.39
  -6   3 -10    2.80    2.29
  -6  -3 -10    0.57    1.98
   7  -3  10    7.24    3.68
   7  -3  10   13.20   20.69
  -7  -3 -10    7.97    4.31
  -7  -3 -10    3.60    2.60
  -7   3 -10    2.66    2.70
   7   3  10    5.83    3.54
  -8   3 -10    5.42    5.05
  -8  -3 -10   -1.10    2.06
  -8   3 -10   -1.90    2.59
  -8  -3 -10    5.84    4.00
   8  -3  10    9.19   19.57
   8   3  10    0.78    3.29
   9   3  10   -2.09    2.52
  -9  -3 -10    2.25    2.31
   9  -3  10   11.74   20.53
  -9   3 -10   -0.20    2.82
  -9   3 -10    4.87    5.41
  10   3  10    9.84    4.38
 -10  -3 -10    7.95    3.37
  10  -3  10    8.56   19.72
 -10   3 -10    2.23    5.68
 -10   3 -10   -1.77    3.66
  10   4 -10   -2.31    2.37
 -10   4  10    0.28    3.66
 -10  -4  10    5.89    3.79
  -9   4  10   -0.13    3.51
  -9  -4  10    1.26    3.13
   9   4 -10    2.48    2.93
  -8   4  10    3.14    3.03
   8   4 -10    0.76    2.90
   8  -4 -10   -1.94    3.70
  -8  -4  10    0.79    2.88
   7  -4 -10    5.27    3.91
  -7   4  10   -3.19    2.45
  -7   4  10    2.81    2.70
   7   4 -10    0.70    2.23
  -7  -4  10   -0.41    2.35
   6  -4 -10   17.68    5.28
   6   4 -10   17.07    5.32
  -6   4  10   16.05    4.89
  -6   4  10   21.99    5.28
  -6  -4  10   14.34    4.73
   5  -4 -10   10.18    4.58
  -5  -4  10   11.74    4.53
  -5   4  10    7.55    4.01
   5   4 -10   11.20    3.94
  -5   4  10    8.35    3.30
  -4   4  10   13.47    4.48
  -4   4  10    7.31    3.59
  -4  -4  10    7.58    3.75
   4  -4 -10    4.19    3.75
  -4  -4  10    5.76    2.52
   4   4 -10    5.30    2.98
  -3  -4  10    3.09    2.83
  -3   4  10   -3.38    2.33
   3   4 -10    0.25    1.93
  -3  -4  10    2.13    1.89
  -3   4  10    2.88    3.45
   3  -4 -10    2.19    3.46
  -2  -4  10   46.03    5.53
  -2   4  10   54.26    7.77
   2   4 -10   35.21    7.19
  -2   4  10   44.19    8.15
   2  -4 -10   60.24    8.79
   1  -4 -10    0.41    2.80
  -1   4  10    3.37    3.10
  -1  -4  10   -1.30    1.43
  -1   4  10    1.01    3.02
   1   4 -10    2.92    2.34
   0   4  10  155.04   12.77
   0  -4  10  163.10   11.90
   0  -4 -10  169.28   13.94
   0   4  10  158.17   13.15
   0   4 -10  155.40   14.11
  -1  -4 -10    3.71    3.61
   1  -4  10    4.47    2.57
  -1   4 -10    6.36    3.52
   1  -4  10   29.37   25.19
   1   4  10    2.32    2.83
   2  -4  10    2.64    2.50
   2   4  10    3.32    2.94
  -2  -4 -10    6.71    4.24
  -2  -4 -10    1.11    2.08
  -2   4 -10    2.03    2.81
   2  -4  10   -0.34   24.02
  -3  -4 -10   13.09    3.51
   3   4  10    9.55    4.45
  -3   4 -10    9.96    4.96
   3  -4  10   16.90    4.72
  -3  -4 -10   17.87    5.73
   3  -4  10  -16.62   25.92
   4  -4  10    1.20   27.37
  -4   4 -10   14.92    5.62
  -4  -4 -10   24.15    4.98
  -4  -4 -10   26.33    6.36
   4   4  10   12.84    4.95
   4  -4  10   20.01    5.22
   5   4  10   -7.30    2.40
  -5  -4 -10    0.60    2.53
  -5   4 -10    2.89    2.58
   5  -4  10   -0.45    2.55
   5  -4  10   17.41   32.79
  -5  -4 -10   -0.96    2.16
   6   4  10   12.57    5.25
   6  -4  10    9.58    4.40
   6  -4  10   -2.32   30.71
  -6  -4 -10   18.20    5.27
  -6   4 -10    6.74    3.38
   7  -4  10   36.45   34.45
   7   4  10    0.34    3.24
  -7   4 -10   -4.69    2.20
  -7  -4 -10    5.42    3.15
   7  -4  10    1.40    3.19
   8  -4  10    3.77    3.47
   8  -4  10   18.76   33.87
   8   4  10   -0.25    3.62
  -8   4 -10   -0.92    2.28
   7  -5 -10    1.63    3.75
   7   5 -10    2.91    2.89
  -7  -5  10   -1.71    2.31
   6   5 -10    3.92    2.74
   6  -5 -10    5.69    3.56
  -6  -5  10    8.21    4.31
   5  -5 -10    2.89    3.64
   5   5 -10   -0.07    2.16
  -5  -5  10    6.86    3.55
   4  -5 -10    6.42    3.77
  -4   5  10    4.71    3.15
  -4  -5  10    3.99    3.80
  -3   5  10   13.12    4.08
   3   5 -10   -0.20    2.74
  -3  -5  10    5.57    2.59
   3  -5 -10   14.36    5.35
  -2  -5  10   -1.97    1.51
   2   5 -10   -2.61    2.21
   2  -5 -10    2.63    3.14
  -2   5  10    2.07    2.83
  -1  -5  10    5.76    2.80
   1   5 -10   -0.14    2.87
   1  -5 -10    3.14    3.45
  -1   5  10    7.03    3.40
   0   5 -10   -1.59    3.06
   0   5  10    3.08    3.42
   0  -5  10    2.88    2.36
   0  -5 -10    3.82    3.79
  -1  -5 -10   12.29    5.20
  -1   5 -10   16.16    6.04
   1   5  10   22.48    6.21
   1  -5  10   13.19    4.00
  -2   5 -10    0.99    3.57
   2  -5  10    4.29    2.94
   2   5  10    0.91    2.96
  -2  -5 -10   -3.53    2.73
   3  -5  10    4.93    3.17
  -3   5 -10   16.68    5.90
   3   5  10    8.70    3.76
  -3  -5 -10    2.68    2.89
   4   5  10   -1.02    2.95
  -4   5 -10    3.44    3.12
   4  -5  10    3.56    3.22
  -4  -5 -10   10.35    4.40
   5   5  10   -1.34    3.29
  -5   5 -10   -1.21    2.78
  -5  -5 -10   -1.53    2.51
   5  -5  10    2.50    2.80
  14   0 -11  -17.98   16.48
 -14   0  11   11.01    3.40
 -14   0  11    2.47    3.43
 -13   0  11    5.82    3.02
  13   0 -11   -0.48   12.14
 -13   0  11    4.57    3.03
  12   0 -11    2.46   14.38
 -12   0  11   -1.91    2.49
 -12   0  11    1.42    2.64
 -11   0  11   57.13    7.49
 -11   0  11   53.91    6.58
 -10   0  11    0.28    2.47
  10   0 -11   -6.41   15.19
 -10   0  11   -0.02    2.14
   9   0 -11   16.79   19.84
  -8   0  11    0.10    1.75
  -8   0  11    1.90    2.38
   8   0 -11   -6.05   12.48
  -7   0  11  126.47    7.58
  -7   0  11  112.83    8.69
   6   0 -11   -1.14    2.93
  -6   0  11   -1.00    1.36
   6   0 -11   -0.79    7.48
  -6   0  11    0.29    1.57
   5   0 -11    3.86    8.29
  -5   0  11    1.55    1.80
  -5   0  11    2.75    1.54
   5   0 -11    4.61    3.68
   4   0 -11   -4.62    2.79
  -4   0  11    1.70    1.55
   4   0 -11    0.70    6.55
  -4   0  11    0.07    0.75
  -3   0  11   -0.09    5.88
   3   0 -11    6.59    3.82
  -3   0  11    2.81    0.87
  -3   0  11    3.39    2.35
  -2   0  11   -1.16    1.49
  -2   0  11   -3.35    6.04
   2   0 -11   -1.55    2.77
  -1   0  11  254.60   14.30
   1   0 -11  293.27   17.94
   0   0  11    0.60    6.46
   0   0 -11    0.58    2.99
   0   0  11    0.42    1.79
  -1   0 -11  189.77   14.79
   1   0  11  212.48   11.70
   2   0  11   -3.32    8.76
  -2   0 -11    0.22    1.63
  -2   0 -11   -0.39    2.47
   2   0  11    2.56    1.69
  -3   0 -11    4.44    3.64
   3   0  11   -2.48    1.24
   3   0  11   -2.82   11.00
  -4   0 -11    0.62    2.58
   4   0  11    0.35    1.65
  -4   0 -11    0.48    3.02
   4   0  11   -5.05   12.72
   5   0  11    8.90    2.68
   5   0  11   -4.41    9.22
  -5   0 -11   13.90    5.78
  -5   0 -11   11.84    3.69
   6   0  11   -0.27    1.84
  -6   0 -11   -0.29    3.13
  -6   0 -11    2.50    4.78
   7   0  11   -5.94    8.91
  -7   0 -11    4.44    4.70
  -7   0 -11    4.61    3.84
  -8   0 -11   -6.35    3.74
  -8   0 -11    3.56    3.53
   8   0  11  -14.73    9.88
  -9   0 -11   60.30   11.01
 -10   0 -11    2.41    3.51
  10   0  11    3.71   13.83
 -10   0 -11    2.97    5.99
  11   0  11   -6.13   11.95
 -11   0 -11   16.97    4.73
  12   0  11  -17.82   10.65
 -12   0 -11    1.69    3.31
  14   1 -11   -0.64   12.46
 -14  -1  11    8.01    2.87
  14  -1 -11   -0.53   20.35
 -14  -1  11    1.49    3.27
 -14   1  11    9.09    4.12
 -13   1  11   17.73    5.60
 -13  -1  11   13.54    3.71
 -13   1  11   11.30    4.16
  13  -1 -11   -5.35   16.54
 -13  -1  11   16.61    5.39
  13   1 -11   15.21   16.76
 -12   1  11   17.38    5.53
  12   1 -11    2.82   18.66
 -12  -1  11    9.99    4.76
 -12   1  11   24.63    5.38
 -12  -1  11   16.75    4.04
  12  -1 -11   -2.34   13.42
 -11   1  11    0.13    3.73
 -11  -1  11    4.81    3.28
  11   1 -11    4.51   16.08
 -11   1  11    6.59    3.20
  11  -1 -11    0.02   20.24
 -11  -1  11    4.03    2.22
 -10   1  11   -1.55    3.18
  10   1 -11    1.58   17.63
 -10  -1  11    2.93    1.96
 -10  -1  11    2.05    2.74
 -10   1  11    2.33    2.33
  10  -1 -11    3.52   16.82
  -9   1  11    9.72    4.55
   9   1 -11  -12.08   15.55
  -9  -1  11    5.25    2.86
  -9  -1  11    4.82    2.29
  -9   1  11    5.71    2.61
   9  -1 -11    2.78   15.09
  -8  -1  11   17.40    4.25
  -8  -1  11   11.93    3.07
  -8   1  11   16.93    4.84
   8   1 -11   -0.06   11.95
  -8   1  11   16.42    3.88
   8  -1 -11   -4.20   12.07
   7  -1 -11  -17.08   10.70
  -7  -1  11    7.90    2.47
   7   1 -11   -3.11    8.87
  -7   1  11    5.67    2.57
  -7  -1  11    6.28    2.59
   7  -1 -11    6.59    3.09
  -7   1  11    6.90    3.67
   6   1 -11   27.74    4.92
  -6   1  11   32.21    4.64
   6  -1 -11    3.31   10.43
   6  -1 -11   26.29    5.06
  -6  -1  11   31.88    4.94
  -6   1  11   24.24    4.19
  -6  -1  11   29.43    3.83
   5  -1 -11   87.08    8.16
  -5   1  11   84.05    5.99
  -5  -1  11   89.47    7.28
  -5  -1  11   81.93    5.86
  -5   1  11   86.15    7.39
  -4   1  11  167.99    8.47
  -4  -1  11  173.49   10.78
  -4   1  11  174.43   10.95
   4   1 -11  157.50   12.12
   4  -1 -11  173.74   12.05
  -4  -1  11  199.85    9.83
  -3   1  11   84.94    7.01
   3  -1 -11   82.36    8.32
  -3  -1  11   76.37    5.58
   3   1 -11   79.94    8.38
  -3  -1  11   76.13    6.31
   2   1 -11    9.63    3.84
  -2  -1  11    9.81    2.86
  -2  -1  11   12.95    2.35
  -2  -1  11    2.11    6.27
  -2   1  11   11.27    3.33
  -2   1  11    1.83    6.95
   2  -1 -11   11.09    4.87
   1  -1 -11   38.67    6.82
   1   1 -11   45.86    4.03
   1   1 -11   37.04    7.32
  -1  -1  11   50.45    4.61
  -1   1  11   44.81    5.62
   0   1 -11    0.26    1.02
   0  -1  11   -0.29    1.12
   0   1  11   -1.01    6.37
   0  -1  11    0.26    7.80
   0   1 -11   -0.77    1.90
   0   1  11   -0.94    1.72
   0  -1 -11    3.41    4.25
   1  -1  11    5.34    9.61
   1   1  11   12.76    3.24
   1   1  11    1.23    7.96
  -1   1 -11    5.79    1.76
  -1  -1 -11    6.52    4.76
   1  -1  11    6.92    2.43
  -1   1 -11    5.66    3.72
  -2   1 -11  223.80   18.39
  -2  -1 -11  233.81    9.59
  -2   1 -11  213.46   11.20
   2   1  11  222.26   12.83
   2  -1  11  178.13   11.20
  -2  -1 -11  237.57   15.40
   3  -1  11    1.95    1.72
  -3  -1 -11    5.75    1.55
  -3   1 -11    0.28    1.60
   3   1  11  -15.87    9.22
  -3  -1 -11   -1.06    4.17
   3   1  11    4.39    2.44
   3  -1  11    3.40    9.54
  -3   1 -11    4.25    3.68
   3  -1  11    1.90    1.72
  -4  -1 -11   17.81    2.78
   4   1  11   18.51    3.93
   4  -1  11    2.66    6.88
   4   1  11    2.80   12.40
  -4  -1 -11   20.57    6.26
  -4   1 -11   16.65    6.36
  -4   1 -11   17.48    3.89
  -5  -1 -11    4.64    5.65
  -5   1 -11   -2.02    2.59
  -5  -1 -11    1.56    1.94
   5   1  11    0.63    1.86
  -5   1 -11   -0.60    2.92
   5  -1  11   -6.70    4.65
   5   1  11   -4.98   13.14
  -6   1 -11   23.97    5.31
  -6  -1 -11   24.32    4.20
   6   1  11   -1.59   12.67
  -6   1 -11   25.48    7.49
   6   1  11   28.17    4.88
  -6  -1 -11   22.44    7.47
   7   1  11   82.33    7.70
  -7  -1 -11   83.84    7.03
  -7   1 -11   70.05   11.76
  -7   1 -11   88.70    9.28
  -7  -1 -11   92.96   11.77
   8   1  11   43.99    5.98
  -8   1 -11   38.00    6.94
  -8   1 -11   32.95    8.69
  -8  -1 -11   56.13    9.50
  -8  -1 -11   46.01    5.69
  -9   1 -11    2.08    4.14
  -9  -1 -11   -1.79    5.48
  -9  -1 -11   -0.70    1.79
   9   1  11   -7.13    8.73
   9  -1  11    0.60    8.70
  -9   1 -11    5.30    4.62
 -10   1 -11   12.31    5.68
 -10  -1 -11   28.79    5.16
  10   1  11    0.99   10.96
  10  -1  11   -5.34    8.30
 -10   1 -11   26.25    8.21
 -11   1 -11   -2.25    3.59
  11  -1  11  -11.58    8.36
 -11  -1 -11    1.94    2.13
  11   1  11   -0.62    9.60
  12   1  11  -12.25    9.32
 -12   1 -11   -2.40    3.03
  12  -1  11   -9.40   10.01
  13   2 -11   -8.22   14.49
 -13  -2  11    7.11    4.01
 -13   2  11    1.72    4.55
 -13  -2  11    1.51    2.52
  13  -2 -11   13.60   19.68
  12  -2 -11   -1.52   15.20
 -12   2  11    8.79    5.47
 -12  -2  11   10.52    4.71
  12   2 -11   10.83   18.58
 -12  -2  11   12.98    4.19
 -11  -2  11    7.79    2.79
 -11   2  11   -5.13    3.72
  11   2 -11  -13.15   11.07
  11  -2 -11    6.08   15.76
 -11   2  11    2.05    2.26
 -11  -2  11    4.34    3.94
 -10   2  11   18.70    6.06
  10  -2 -11   -5.02   17.75
 -10  -2  11   24.15    6.09
  10   2 -11  -12.40   15.23
 -10   2  11    9.38    3.35
 -10  -2  11   13.07    3.82
  -9   2  11    3.30    4.49
  -9  -2  11    1.79    2.19
   9  -2 -11    2.11   17.88
  -9  -2  11    1.25    2.93
   9   2 -11  -14.25   14.27
  -9   2  11    2.75    2.08
  -8  -2  11   -0.29    1.73
   8   2 -11    4.92   13.23
   8  -2 -11    6.22   15.48
  -8   2  11    1.92    2.27
  -8  -2  11    2.35    2.67
  -8   2  11   -0.12    3.71
  -7  -2  11  193.90   12.34
  -7   2  11  172.11   12.53
  -7   2  11  224.08   13.90
  -7  -2  11  218.42   14.07
   7  -2 -11  221.17   14.48
  -6  -2  11    0.08    1.65
  -6   2  11   -0.51    2.51
   6  -2 -11   -2.18   10.63
  -6   2  11    2.27    2.37
  -6  -2  11    4.24    2.69
   6   2 -11    0.95    8.63
   6  -2 -11   -2.51    2.69
  -5   2  11  130.58   10.12
  -5  -2  11  133.50   10.07
  -5  -2  11  166.45   10.60
   5   2 -11  139.37   13.02
   5  -2 -11  141.72   11.20
  -5   2  11  141.48    9.24
   4  -2 -11   11.55    4.79
  -4  -2  11   17.45    3.87
  -4   2  11   16.91    4.31
  -4  -2  11    3.25    9.88
   4   2 -11    9.53    4.26
  -4   2  11   12.96    2.93
  -4  -2  11   12.38    3.43
   4  -2 -11    2.52    9.26
  -3  -2  11    2.46    9.91
  -3  -2  11    5.69    2.32
   3  -2 -11    4.19    4.22
   3  -2 -11   -1.41    6.25
  -3  -2  11    3.96    2.22
   3   2 -11    5.16    3.99
  -3   2  11    0.47    2.19
  -2  -2  11    6.26    2.34
   2   2 -11    8.78    4.94
   2  -2 -11    1.23    6.21
  -2   2  11    8.42    3.11
   2  -2 -11    1.56    4.07
  -2  -2  11    8.02    2.68
  -2  -2  11   13.72   13.78
  -1  -2  11   86.49    6.59
   1  -2 -11   92.50    9.26
  -1   2  11   92.10    7.86
   1   2 -11   94.14    7.91
   1   2 -11   85.07   12.28
   0  -2  11  435.19   19.54
   0   2 -11  417.20   28.93
   0  -2 -11  448.23   24.13
   0   2 -11  437.72   21.84
   0   2  11  426.09   21.85
   1  -2  11   92.86    6.05
  -1  -2 -11   86.56    9.75
  -1   2 -11   87.85   12.80
   1   2  11   90.50    8.11
  -1   2 -11   83.78    7.64
   2  -2  11   17.23   17.22
  -2  -2 -11   73.25    9.22
   2   2  11   62.86    6.68
  -2   2 -11   64.96    6.50
  -2   2 -11   63.98   11.67
  -3   2 -11   -0.54    3.11
   3  -2  11   -1.08   10.55
   3   2  11    0.45    7.15
  -3  -2 -11    8.84    5.67
  -3   2 -11   11.43    3.32
   3   2  11    9.95    3.48
   4   2  11  181.60   12.82
  -4   2 -11  161.65   17.78
  -4  -2 -11  196.12   14.97
  -4   2 -11  177.84   12.20
  -4  -2 -11  191.08   10.36
  -5  -2 -11   92.65   10.76
   5   2  11   99.15    8.99
  -5   2 -11   85.43    8.11
  -5   2 -11   87.02   14.51
  -5  -2 -11  100.90    7.10
  -6  -2 -11    4.50    2.41
  -6   2 -11    4.31    4.67
   6  -2  11   -0.48   11.59
   6   2  11    4.97    2.88
  -6   2 -11    3.00    2.98
  -6  -2 -11   -2.01    4.75
   7   2  11   54.78    7.66
  -7  -2 -11   71.80    9.82
  -7   2 -11   41.37   11.25
  -7   2 -11   45.88    7.26
  -8   2 -11    5.24    3.89
  -8   2 -11    5.31    5.24
   8   2  11    3.80    3.14
  -8  -2 -11    7.78    5.23
   8  -2  11   13.94   13.67
  -9   2 -11   10.82    6.62
   9   2  11    2.09    3.00
  -9   2 -11    0.70    3.94
  -9  -2 -11    7.42    5.29
   9  -2  11    4.25   11.72
  10  -2  11    5.05   11.68
 -10   2 -11   16.93    6.25
  10   2  11   27.89    5.96
 -10   2 -11   10.15    5.89
  11  -2  11   -0.59    9.24
 -11   2 -11   -2.43    3.85
 -11   2 -11   -0.73    4.53
 -12  -3  11    1.71    2.66
  12  -3 -11   10.17   19.88
 -11  -3  11    1.82    2.51
  11  -3 -11   10.92   17.16
 -11  -3  11    1.39    4.20
  10   3 -11  -16.68   15.62
  10  -3 -11    1.58   13.29
 -10  -3  11   19.91    5.69
 -10  -3  11   19.94    5.14
  -9  -3  11    4.05    4.09
  -9  -3  11    6.54    3.31
   9   3 -11   -6.89   16.19
   9  -3 -11   -0.62   14.15
  -9   3  11    6.35    2.90
   8  -3 -11   -0.29   12.84
  -8  -3  11   10.97    4.27
  -8   3  11   -3.08    2.34
   8  -3 -11    7.12    3.67
  -8  -3  11    2.40    2.59
   8   3 -11    4.25   13.63
   7  -3 -11   10.50    4.13
  -7  -3  11    3.54    2.86
   7  -3 -11    4.98   13.08
  -7   3  11    3.93    2.77
  -7  -3  11    8.11    3.96
   7   3 -11    3.73   11.57
   6  -3 -11    2.07    2.69
   6  -3 -11    5.65   13.93
  -6  -3  11   -4.23    1.72
  -6  -3  11    1.27    3.14
  -6   3  11   -0.66    2.38
   6   3 -11   -1.16    7.61
   5   3 -11   -0.85    6.61
  -5   3  11    3.54    2.93
  -5  -3  11    1.90    2.02
   5  -3 -11   -7.31    8.94
  -5  -3  11    3.31    2.60
   5  -3 -11    0.06    2.87
  -5  -3  11    2.13    2.59
  -4  -3  11  148.73   11.38
  -4  -3  11  128.48    9.18
   4  -3 -11  126.33   11.73
  -4  -3  11  124.13    9.99
  -4   3  11  138.21   10.78
  -3  -3  11   15.87    3.70
  -3   3  11   16.24    4.78
  -3  -3  11   14.27    4.17
  -3  -3  11   14.19    4.16
   3  -3 -11   14.49    5.33
  -2  -3  11   19.24   20.56
  -2  -3  11   27.03    4.38
  -2  -3  11   32.98    5.16
  -2   3  11   27.75    5.77
   2  -3 -11   20.35    5.68
   1   3 -11    4.89    2.76
  -1  -3  11    7.35   18.60
  -1  -3  11    3.12    1.95
  -1   3  11    4.58    2.87
  -1  -3  11    9.46    3.07
   1  -3 -11    4.10    4.32
   0  -3  11    1.27    1.94
   0   3 -11    4.44    2.60
   0  -3 -11    2.40    4.30
   0   3  11    6.77    3.05
   0  -3  11   27.50   25.39
  -1  -3 -11   10.34    5.32
   1   3  11    4.36    3.17
  -1   3 -11    8.42    3.67
   1  -3  11    9.46    3.25
   1  -3  11   46.34   27.54
   2   3  11   62.31    8.18
  -2   3 -11   62.19    8.83
   2  -3  11   26.75   26.39
  -2  -3 -11   53.09    8.79
   2  -3  11   51.38    6.05
   3  -3  11  -20.34   23.50
  -3  -3 -11    2.56    4.02
  -3   3 -11    0.73    2.08
   3   3  11    0.78    2.51
   3  -3  11   -0.87    1.99
  -4  -3 -11  197.43   15.17
   4  -3  11  191.36   13.55
   4   3  11  195.73   14.52
  -4   3 -11  166.92   13.62
  -5  -3 -11   85.77    9.88
   5  -3  11   18.25   23.34
  -5   3 -11   80.02    8.64
   5   3  11   82.61    9.13
   5  -3  11   83.63    8.64
   6  -3  11   -6.71   20.53
   6   3  11   10.76    4.82
  -6  -3 -11   17.57    5.82
  -6   3 -11   10.95    4.14
   7   3  11    9.47    4.44
  -7   3 -11   15.85    7.60
   7  -3  11    1.95   19.78
  -7  -3 -11   15.35    5.54
  -7   3 -11    9.17    3.74
  -8   3 -11    5.33    6.03
   8   3  11   12.31    4.76
  -8   3 -11    6.70    4.02
   8  -3  11   13.28   22.44
  -8  -3 -11   18.35    6.03
  -9   3 -11   -1.20    3.53
   9   3  11    3.91    3.25
   9  -3  11    6.16   19.60
  -9   3 -11   10.26    6.25
  10   3  11    4.07    4.04
 -10   3 -11    1.07    6.34
 -10   3 -11    2.34    4.67
  10  -3  11    1.88   17.82
  10   4 -11    9.01    4.39
 -10  -4  11   10.63    4.46
  -9  -4  11   -0.90    2.66
   9   4 -11   -1.56    2.41
   8   4 -11    2.04    2.89
  -8  -4  11   -0.51    2.62
   8  -4 -11    1.35    3.66
   7  -4 -11    9.08    4.50
  -7   4  11    3.10    3.52
  -7  -4  11    5.12    3.19
   7   4 -11   -0.26    2.22
  -6  -4  11    5.04    3.50
  -6   4  11    6.00    3.39
   6  -4 -11    7.32    3.84
   6   4 -11   -1.54    2.27
  -5   4  11    9.14    3.64
  -5  -4  11    9.54    4.22
   5  -4 -11    8.36    3.97
   5   4 -11    5.28    3.45
   4  -4 -11   -1.28    2.58
   4   4 -11   -0.74    1.97
  -4   4  11   -4.22    2.29
  -4  -4  11    0.35    1.70
  -4  -4  11    0.80    2.40
  -3  -4  11    3.19    3.07
  -3  -4  11    4.49    2.23
   3   4 -11    0.67    2.02
  -3   4  11    3.23    3.13
   3  -4 -11   10.20    4.18
  -2  -4  11   -0.18    1.61
   2   4 -11   -2.23    1.87
   2  -4 -11   -1.00    3.04
  -2   4  11    1.89    2.58
   1   4 -11   59.61    9.28
  -1  -4  11   53.14    6.22
  -1   4  11   68.51    9.16
   1  -4 -11   69.24    9.73
   0  -4 -11    4.28    4.01
   0   4 -11    1.32    2.70
   0  -4  11    0.73    1.99
   0   4  11    1.71    2.55
   0  -4  11   43.29   25.24
  -1  -4 -11    0.74    3.67
   1  -4  11    3.86    2.49
   1  -4  11   25.96   26.34
  -1   4 -11    2.77    3.25
   1   4  11    4.36    3.13
   2   4  11   53.85    8.86
   2  -4  11   59.17    7.08
  -2  -4 -11   69.49    9.58
  -2   4 -11   80.34   11.39
   2  -4  11   30.28   27.47
   3  -4  11   -5.49   25.31
  -3  -4 -11   -0.67    3.29
  -3   4 -11    0.91    2.79
   3  -4  11   -1.92    2.13
   3   4  11    3.74    2.97
  -4  -4 -11   51.24    8.38
  -4   4 -11   43.97    8.95
   4  -4  11   54.07    7.88
   4   4  11   43.49    8.18
  -5   4 -11   14.98    5.31
  -5  -4 -11   31.40    6.96
   5  -4  11   23.29   33.21
   5  -4  11   20.95    5.70
   5   4  11   17.04    5.22
   6  -4  11    5.02   32.28
  -6  -4 -11    2.99    2.94
   6  -4  11    1.42    2.97
  -6   4 -11    3.64    2.79
   6   4  11   -7.12    2.67
   7  -4  11  -13.53   32.46
   7   4  11    2.69    4.08
   7  -4  11    1.18    3.06
  -7   4 -11    3.06    3.15
  -7  -4 -11    8.41    3.36
  -8   4 -11    6.52    4.12
  -8  -4 -11   18.69    5.09
   8  -4  11    9.37    4.63
   6  -5 -11    2.78    3.42
   6   5 -11    1.85    2.37
  -6  -5  11   -1.28    2.84
  -5  -5  11    7.95    4.25
   5  -5 -11    1.41    3.25
   4  -5 -11   30.73    6.97
  -4  -5  11   33.64    7.97
  -4   5  11   41.64    7.78
   3  -5 -11    5.84    3.66
  -3  -5  11    4.52    2.43
   3   5 -11   -2.47    2.18
  -3   5  11   -3.46    2.69
  -2  -5  11    2.56    2.41
  -2   5  11    0.35    2.97
   2  -5 -11    3.19    2.82
   2   5 -11    0.59    2.55
  -1   5  11   -1.89    2.61
   1   5 -11    4.69    3.09
  -1  -5  11    4.81    2.59
   1  -5 -11    3.88    3.86
   0  -5  11    4.17    2.91
   0  -5 -11    5.59    3.97
   0   5 -11    5.78    3.27
   0   5  11    9.59    4.34
   1  -5  11   -1.29    2.03
  -1  -5 -11    1.27    2.80
   1   5  11   -3.14    2.56
   2  -5  11   -0.81    2.11
   2   5  11    3.19    3.41
  -2  -5 -11    4.30    3.24
  -2   5 -11    6.74    3.95
   3  -5  11    0.14    2.32
   3   5  11    1.06    2.92
  -3   5 -11   -2.46    3.02
  -3  -5 -11    1.60    2.83
  -4  -5 -11    9.18    4.22
   4  -5  11    2.72    3.13
  -4   5 -11    2.81    3.23
   4   5  11    2.74    3.43
  14   0 -12   -7.11    9.73
 -14   0  12   10.28    3.24
 -14   0  12    8.10    3.74
  13   0 -12    3.20   13.59
 -13   0  12    6.26    2.89
 -13   0  12   -3.35    2.74
 -12   0  12    3.38    2.91
 -12   0  12    3.80    2.42
  12   0 -12   -2.08   14.76
 -11   0  12    1.55    2.73
  11   0 -12   -6.74   12.06
 -11   0  12   -0.68    1.94
 -10   0  12   87.43    8.40
 -10   0  12   95.27    7.45
  -9   0  12    1.32    2.01
  -9   0  12    0.57    2.17
   9   0 -12    6.41   17.55
  -8   0  12   13.56    3.48
   8   0 -12   11.42   17.22
  -8   0  12    9.29    2.85
  -7   0  12    0.28    1.56
   7   0 -12   -3.21   11.52
  -7   0  12   -0.38    1.69
   6   0 -12   -4.11    3.22
  -6   0  12   -0.04    1.69
   6   0 -12   -1.93    7.91
   5   0 -12   -3.56    3.69
  -5   0  12    0.31    1.70
   5   0 -12    5.10    9.62
  -3   0  12   -6.66    4.46
  -3   0  12    0.51    1.99
   3   0 -12   -5.75    2.81
   2   0 -12  122.20   11.16
  -2   0  12  133.64    9.54
  -1   0  12   -0.92    7.10
  -1   0  12    1.07    2.08
   1   0 -12    0.39    3.00
   0   0  12  666.52   28.90
   0   0 -12  624.79   33.63
   1   0  12   -0.53    8.28
   1   0  12   -0.84    1.68
  -1   0 -12    2.72    3.79
   2   0  12   -6.81    8.26
   2   0  12    7.70    2.86
  -2   0 -12    3.23    4.30
   3   0  12   -7.64   10.85
  -3   0 -12   -1.49    3.49
   3   0  12   -1.53    1.46
  -4   0 -12   -0.77    3.69
   4   0  12   -0.83   10.11
   4   0  12   -1.54    1.51
   5   0  12   -2.91    9.05
   5   0  12    0.13    1.76
  -5   0 -12   -1.57    4.09
  -6   0 -12   30.50    8.36
   6   0  12    0.27   11.83
  -7   0 -12   -5.50    3.82
  -8   0 -12   27.97    8.65
   8   0  12   -1.38   12.37
  -9   0 -12    3.57    5.63
   9   0  12    7.29   13.28
 -10   0 -12    0.14    6.42
  10   0  12   -0.87   12.46
  11   0  12   -9.41   11.22
 -14  -1  12   11.46    3.39
 -13  -1  12    4.94    2.18
  13   1 -12  -15.59   13.32
 -13  -1  12   -4.39    2.91
 -13   1  12    2.00    2.78
  13  -1 -12   17.40   17.84
 -12  -1  12   11.83    3.32
 -12  -1  12   14.18    4.79
  12   1 -12   11.62   18.13
 -12   1  12   12.30    4.05
  12  -1 -12   -6.18   15.78
  11  -1 -12    6.01   19.39
 -11  -1  12   11.12    4.42
 -11   1  12    6.33    2.94
  11   1 -12    0.40   18.31
 -11  -1  12    8.75    3.05
 -10  -1  12   -0.59    2.86
 -10   1  12   -0.64    2.19
 -10  -1  12    4.32    2.33
  10  -1 -12    0.97   16.89
  10   1 -12    5.32   16.46
   9  -1 -12    1.52   15.19
  -9   1  12   57.77    5.98
  -9  -1  12   54.92    7.37
   9   1 -12   -3.03   16.05
  -9  -1  12   53.58    5.25
  -8  -1  12   12.75    4.06
  -8  -1  12   11.27    2.90
   8   1 -12   -1.32   12.43
  -8   1  12   11.00    3.18
   8  -1 -12   -5.01   13.56
  -7   1  12   12.66    3.26
   7  -1 -12    7.16   13.84
   7  -1 -12   13.88    4.40
   7   1 -12   -3.94    9.07
  -7  -1  12   13.63    2.92
  -7  -1  12   11.44    3.36
  -6   1  12   88.15    7.77
   6  -1 -12  103.98    9.05
  -6  -1  12   78.76    6.08
   6   1 -12   76.21    7.97
  -6  -1  12   88.16    7.52
  -5  -1  12   13.99    3.61
   5  -1 -12   16.65    5.16
   5   1 -12    6.07    3.28
   5   1 -12    2.30    7.15
   5  -1 -12    2.68    7.91
  -5   1  12   14.40    4.01
  -5  -1  12   11.39    2.68
  -4  -1  12   13.93    2.85
   4   1 -12   14.62    4.21
   4  -1 -12   15.98    5.43
   4  -1 -12    3.79    8.65
  -4  -1  12   16.54    3.88
  -4   1  12   17.34    3.77
   3  -1 -12    2.18    4.20
  -3   1  12   -0.60    2.17
  -3  -1  12    2.03    5.96
   3   1 -12    2.92    2.40
  -3  -1  12    3.09    1.46
  -3  -1  12    2.11    1.81
   3  -1 -12    2.99    7.20
  -2   1  12  195.42   12.06
   2   1 -12  188.99    9.92
   2  -1 -12  172.88   13.57
  -2  -1  12  197.55   11.18
   2   1 -12  173.58   14.46
   1   1 -12  392.84   25.05
   1  -1 -12  393.11   22.63
   1   1 -12  398.05   17.48
  -1  -1  12  400.08   18.94
  -1   1  12  415.22   20.28
   0   1  12   86.80    7.29
   0   1 -12   87.13   10.42
   0   1 -12   79.69    5.47
   0  -1 -12   84.87    9.62
  -1  -1 -12    6.90    5.05
  -1   1 -12    8.96    4.29
  -1   1 -12    8.79    2.09
   1  -1  12    9.24    2.66
   1  -1  12   -1.24    7.38
   1   1  12    4.72    8.51
   1   1  12    2.73    2.27
  -2  -1 -12   82.93    9.43
   2   1  12   83.88    7.23
  -2   1 -12   86.53    6.12
  -2   1 -12   77.53   11.44
   2  -1  12   81.36    6.54
   3   1  12   -0.73   10.30
  -3  -1 -12   13.44    6.27
   3  -1  12    1.21    6.35
   3   1  12   11.85    3.40
   3  -1  12   10.54    2.58
  -3   1 -12   12.10    3.15
  -3   1 -12   13.41    5.52
  -4   1 -12   30.44    8.28
  -4  -1 -12   29.16    7.77
  -4   1 -12   30.05    4.87
   4   1  12   31.75    5.30
   5  -1  12    3.04    7.82
  -5   1 -12    6.52    3.76
  -5   1 -12    3.55    3.81
   5   1  12   -2.83   13.73
  -5  -1 -12   10.05    6.52
   5   1  12    5.57    3.02
  -6  -1 -12   49.38    9.35
  -6   1 -12   29.43    8.57
  -6   1 -12   40.39    6.37
   6   1  12   30.06    5.15
  -7   1 -12   -3.03    3.60
   7   1  12    6.03   10.96
   7   1  12    0.73    2.06
  -7  -1 -12   -3.55    4.74
  -7   1 -12   -0.26    3.58
   8   1  12   46.01    6.24
  -8   1 -12   54.01    7.74
  -8  -1 -12   40.32    8.96
  -8   1 -12   36.70    8.87
  -9  -1 -12   18.42    7.23
   9  -1  12   -2.95    8.45
  -9   1 -12   21.38    5.73
  -9   1 -12   20.06    7.36
   9   1  12   -0.48    9.86
 -10   1 -12   11.30    5.25
 -10   1 -12    8.46    5.86
  10   1  12   -7.37   10.90
 -10  -1 -12   15.34    7.46
  10  -1  12    2.90   10.35
 -11   1 -12    6.12    5.06
  11   1  12  -10.36    9.76
  11  -1  12   -3.08    9.72
  13   2 -12    5.33   17.21
 -13  -2  12   -1.37    3.40
  13  -2 -12   18.76   19.87
 -13  -2  12    0.59    1.79
 -12   2  12    1.39    2.55
  12  -2 -12    6.78   15.66
 -12  -2  12    5.29    3.76
 -12  -2  12   -1.03    1.93
  12   2 -12    0.83   16.32
 -11  -2  12    1.38    2.06
  11   2 -12  -29.09   13.81
 -11  -2  12    2.20    3.55
 -11   2  12   -1.75    2.19
  11  -2 -12   -8.04   17.70
 -10  -2  12    0.45    2.17
 -10   2  12    2.06    2.22
 -10  -2  12    6.03    3.66
  10  -2 -12   32.52   25.74
  10   2 -12    2.19   18.42
   9  -2 -12    5.65   17.46
  -9  -2  12    2.31    1.86
   9   2 -12    6.66   16.16
  -9   2  12   -3.89    1.66
  -9  -2  12   -2.51    2.86
  -8  -2  12   23.88    4.61
   8   2 -12    3.56   11.44
   8  -2 -12   -1.87   14.14
  -8  -2  12   44.86    7.33
  -8   2  12   23.48    4.77
   7  -2 -12   14.47   15.09
  -7  -2  12   -0.71    2.47
  -7  -2  12   -0.77    1.50
   7  -2 -12    0.86    2.72
   7   2 -12   -4.64   11.02
  -7   2  12   -0.82    2.73
  -6  -2  12  117.59    9.82
  -6   2  12  135.31   10.13
   6  -2 -12  133.41   11.05
  -6  -2  12  118.07    9.18
   5  -2 -12   -1.44   12.46
   5   2 -12    9.89    4.80
   5  -2 -12   13.04    5.42
   5   2 -12   -1.74    6.21
  -5   2  12   17.97    4.55
  -5  -2  12   10.57    3.21
  -5  -2  12   11.83    3.64
  -4  -2  12   29.69    4.93
  -4  -2  12   32.43    4.99
  -4   2  12   34.15    5.75
   4  -2 -12   28.95    6.41
   4   2 -12   46.28    8.89
  -3  -2  12   -1.14    8.90
  -3  -2  12    0.46    1.80
  -3   2  12    1.50    2.10
   3   2 -12    0.16    2.96
   3  -2 -12   -2.45    3.76
   3  -2 -12    0.71    6.62
  -3  -2  12   -0.58    1.67
  -2   2  12  148.14   10.90
   2  -2 -12  169.99   13.07
   2   2 -12  158.34   10.67
   2   2 -12  135.35   14.71
  -2  -2  12  154.77    9.93
  -1  -2  12    2.62    9.43
  -1  -2  12    5.39    2.17
   1  -2 -12    8.54    5.19
   1   2 -12    7.28    2.64
   1   2 -12    4.13    4.13
  -1   2  12    5.14    2.77
   0   2  12   18.32    4.22
   0  -2 -12   13.14    5.54
   0   2 -12   12.15    3.53
   0   2  12    2.81    6.99
   0  -2  12   15.60    2.96
   0  -2  12   18.05   14.86
   0   2 -12    8.83    4.48
  -1   2 -12  108.06   14.93
   1  -2  12  132.69    7.90
  -1  -2 -12  136.90   12.27
   1   2  12  133.65   10.12
  -1   2 -12  128.56    9.79
   2  -2  12    8.51   12.42
  -2  -2 -12   15.78    6.35
   2   2  12    2.37    6.42
  -2   2 -12    9.88    5.41
   2   2  12   18.04    4.66
  -2   2 -12   17.88    4.09
  -3   2 -12   19.21    4.15
  -3   2 -12   14.55    6.40
   3   2  12    4.36    7.69
  -3  -2 -12   14.11    6.73
   3  -2  12   -7.07    8.68
   3   2  12   18.24    4.67
  -4  -2 -12  240.66   16.92
   4   2  12  203.81   14.04
  -4   2 -12  184.56   12.74
  -4   2 -12  213.42   20.76
  -5   2 -12   10.92    3.75
   5  -2  12    4.34   13.40
   5   2  12   11.40    3.56
  -5  -2 -12   10.99    6.34
  -5   2 -12   19.89    7.82
   6   2  12   16.61    4.58
   6  -2  12    0.03   11.77
  -6   2 -12    7.08    3.66
  -6   2 -12   13.35    6.68
  -6  -2 -12   13.45    6.59
   7  -2  12    0.90   12.68
  -7   2 -12    1.72    4.57
  -7   2 -12    1.30    3.26
  -7  -2 -12    4.61    5.40
   7   2  12    2.67    3.27
   8   2  12    4.01    3.11
   8  -2  12    3.06   12.25
  -8   2 -12    6.69    5.61
  -8   2 -12   -0.27    3.57
  -8  -2 -12    2.04    4.89
   9  -2  12   -3.59   10.97
  -9  -2 -12   20.05    7.50
  -9   2 -12    9.66    7.09
  -9   2 -12   11.04    4.95
   9   2  12    8.74    4.06
 -10   2 -12    1.02    4.37
  10   2  12   -2.25    2.76
 -10   2 -12   -0.08    4.43
  10  -2  12    6.15   14.31
 -12  -3  12    0.18    2.21
 -11  -3  12   -0.90    4.07
  11  -3 -12    1.16   14.37
 -11  -3  12    5.23    2.84
  10   3 -12  -15.26   15.32
  10  -3 -12   -9.24   14.46
 -10  -3  12    3.94    2.90
 -10  -3  12    2.35    4.29
 -10   3  12   -1.06    2.23
  -9  -3  12   35.16    6.79
  -9  -3  12   30.26    6.21
   9  -3 -12   -4.30   13.51
   9   3 -12   -9.62   14.92
  -8   3  12   13.29    4.34
   8  -3 -12    7.41    3.82
  -8  -3  12   17.73    4.83
  -8  -3  12    5.97    3.66
   8  -3 -12    7.03   14.36
   8   3 -12    3.35   13.44
   7  -3 -12    4.50   14.89
   7   3 -12    7.16   10.87
  -7  -3  12    1.65    2.55
  -7  -3  12   -0.09    2.92
   7  -3 -12    5.20    3.14
  -7   3  12    0.16    2.27
  -6  -3  12    6.70    3.40
  -6   3  12    2.63    2.88
   6   3 -12   -6.46    6.34
   6  -3 -12   -3.47   13.97
  -6  -3  12    3.57    2.95
   6  -3 -12    6.08    3.45
  -5  -3  12   26.65    5.54
  -5   3  12   36.13    6.46
  -5  -3  12   31.70    6.04
   5  -3 -12   35.99    7.01
  -4  -3  12   58.83   20.53
  -4  -3  12   45.50    5.42
  -4  -3  12   53.32    7.27
  -4  -3  12   50.75    6.81
   4  -3 -12   48.45    8.24
  -4   3  12   52.92    7.46
   3  -3 -12   68.71    9.14
  -3   3  12   64.39    8.36
  -3  -3  12   58.13    6.38
  -3  -3  12   72.95    6.69
  -3  -3  12   76.53    8.04
  -2  -3  12   25.84    4.75
   2   3 -12   16.55    4.51
  -2  -3  12   23.59   24.77
  -2   3  12   23.61    5.28
  -2  -3  12   27.89    4.65
   2  -3 -12   27.93    6.60
  -1   3  12   30.52    6.01
  -1  -3  12   -3.66   20.07
   1   3 -12   33.02    6.38
   1  -3 -12   27.60    7.13
  -1  -3  12   29.09    4.85
   0  -3  12   51.55    5.89
   0   3  12   53.26    7.68
   0   3 -12   46.91    7.67
   0  -3 -12   53.39    8.76
   0  -3  12   18.60   23.28
   1   3  12  165.83   13.24
  -1  -3 -12  184.85   14.74
  -1   3 -12  199.43   14.69
   1  -3  12  181.58   12.55
   2   3  12    1.31    2.71
   2  -3  12   29.47   24.41
  -2   3 -12    7.33    3.48
  -2  -3 -12    9.14    5.32
   2  -3  12    3.31    2.56
  -3  -3 -12    1.81    4.60
   3  -3  12  -17.02   20.60
  -3   3 -12   -0.37    1.77
   3   3  12    2.82    2.84
   3  -3  12    0.26    2.29
  -4  -3 -12   65.11    9.25
  -4   3 -12   49.98    7.75
   4   3  12   62.67    8.59
   4  -3  12   20.59   24.18
  -5   3 -12    3.14    2.71
   5   3  12   10.11    4.08
  -5  -3 -12    6.02    4.60
  -5   3 -12    7.36    6.66
   5  -3  12   14.65   23.27
   6   3  12   18.72    5.72
   6  -3  12  -10.85   16.90
  -6   3 -12   14.34    4.72
  -6   3 -12   24.62    8.98
  -6  -3 -12   21.25    6.42
  -7   3 -12   25.93    6.68
   7  -3  12   19.98   21.84
  -7  -3 -12   50.33    8.41
  -7   3 -12   21.77    8.62
   7   3  12   33.21    7.12
   8  -3  12   11.37   18.69
  -8   3 -12   -0.14    2.88
  -8  -3 -12    2.32    3.73
  -8   3 -12    2.36    4.29
   8   3  12    0.60    2.86
  -9   3 -12   -1.62    3.65
   9   3  12   -1.09    2.84
  -9   3 -12    0.93    5.33
  -9  -4  12   10.31    4.60
   9   4 -12    4.92    4.05
   8   4 -12    9.79    5.03
   8  -4 -12   15.93    5.38
  -8  -4  12   12.65    4.44
  -7   4  12    0.52    2.84
   7  -4 -12    7.30    4.32
  -7  -4  12    4.09    3.16
  -6   4  12   13.80    4.69
  -6  -4  12   15.71    4.90
   6  -4 -12   15.01    5.41
  -5   4  12    0.29    2.46
   5  -4 -12    2.39    2.92
  -5  -4  12    0.40    2.78
  -4   4  12    0.35    2.44
  -4  -4  12    3.20    2.22
  -4  -4  12   -0.14    2.94
   4  -4 -12    4.40    3.48
   3  -4 -12   -4.17    2.13
  -3   4  12    3.15    2.98
   3   4 -12   -1.64    1.84
  -3  -4  12    1.25    1.85
   2   4 -12    1.45    2.49
  -2  -4  12   -0.72    1.66
   2  -4 -12    2.41    3.34
  -2   4  12   -2.90    2.41
  -1  -4  12   17.26   23.04
   1  -4 -12   29.78    7.17
   1   4 -12   32.10    7.01
  -1  -4  12   33.60    5.63
  -1   4  12   34.67    7.21
   0  -4  12    9.10   24.48
   0  -4  12    3.34    2.32
   0  -4 -12    5.72    4.04
   0   4  12   13.05    4.47
   0   4 -12   11.65    4.22
   1  -4  12   -0.98   25.90
   1   4  12   67.26    9.85
  -1   4 -12   43.06    8.76
  -1  -4 -12   57.27    9.15
   1  -4  12   45.96    6.87
   2  -4  12   20.54    4.86
  -2   4 -12   17.40    5.99
   2   4  12   18.45    5.64
  -2  -4 -12   18.13    5.67
   2  -4  12   41.86   27.86
   3  -4  12    4.65   27.37
   3   4  12   63.29    9.73
   3  -4  12   53.00    7.67
  -3  -4 -12   67.64    9.56
  -3   4 -12   55.16    9.93
   4  -4  12  -11.02   29.84
  -4  -4 -12    1.40    2.65
   4   4  12   -5.15    2.44
  -4   4 -12    0.83    2.88
   4  -4  12    1.87    2.79
  -5   4 -12    0.10    2.51
  -5  -4 -12    9.27    4.30
   5  -4  12    1.45    2.81
   5  -4  12   12.21   31.04
   5   4  12    5.58    3.41
   6  -4  12   43.86   34.55
  -6   4 -12    0.69    2.50
   6  -4  12    2.32    3.27
   6   4  12   -6.07    2.50
  -6  -4 -12    5.00    3.95
   7  -4  12   27.85   35.89
   7  -4  12    0.86    3.59
   7   4  12    3.79    3.86
  -7  -4 -12   14.35    4.93
  -5  -5  12    6.35    3.82
   5  -5 -12    9.16    4.26
  -5   5  12    4.79    3.60
   4   5 -12    1.85    3.40
   4  -5 -12    9.39    4.53
  -4   5  12   -2.35    3.18
  -3  -5  12    3.30    2.53
  -3   5  12    7.65    4.20
   3   5 -12   -0.35    2.56
   3  -5 -12    8.36    4.09
  -2   5  12    6.86    3.49
   2   5 -12    8.09    3.82
   2  -5 -12    4.66    3.83
  -2  -5  12    1.55    2.19
  -1  -5  12   14.35    3.92
   1  -5 -12   13.90    5.31
   1   5 -12   12.20    5.10
  -1   5  12   18.84    5.67
   0  -5  12    3.08    2.46
   0   5 -12    9.33    4.67
   0  -5 -12    3.60    3.08
   0   5  12    3.41    3.55
   1   5  12   25.62    6.70
  -1  -5 -12   21.99    5.90
  -1   5 -12   20.14    7.18
   1  -5  12   21.34    5.00
   2   5  12    1.85    3.33
   2  -5  12    5.49    2.99
  -2   5 -12    2.53    3.65
  -2  -5 -12    7.73    3.47
  -3   5 -12    0.76    3.53
   3  -5  12    4.62    2.87
   3   5  12    8.85    4.31
  -3  -5 -12    5.48    3.37
 -13   0  13   29.11    6.53
  13   0 -13   -6.22   12.44
  12   0 -13  -14.70   12.26
 -12   0  13   -0.14    2.39
 -11   0  13   23.06    5.24
  11   0 -13  -14.10   11.95
  10   0 -13    2.20   18.71
 -10   0  13    0.30    2.15
   9   0 -13    4.61   18.54
  -9   0  13   59.31    7.29
   8   0 -13  -13.54   14.40
  -8   0  13   -2.33    1.86
   7   0 -13    1.42    9.78
  -7   0  13    2.70    2.20
   6   0 -13   -1.26    8.87
   6   0 -13   -4.58    3.29
  -6   0  13   -3.11    1.52
   5   0 -13  439.09   23.22
  -5   0  13  437.54   21.56
   4   0 -13   -0.66    4.32
   4   0 -13    7.98    8.91
  -4   0  13    1.23    1.88
   3   0 -13   62.02    8.63
  -3   0  13   69.41    6.91
  -2   0  13    1.64    6.28
  -2   0  13   -0.34    2.11
   2   0 -13   -1.71    4.05
  -1   0  13   68.31    6.61
   1   0 -13   96.94   10.35
   0   0  13    3.88    7.78
   0   0 -13    2.51    3.76
   0   0  13    3.13    2.41
   1   0  13    5.33    8.29
   1   0  13   17.79    3.98
  -1   0 -13   18.90    6.52
   2   0  13    5.00    2.40
   2   0  13    8.71   10.75
  -2   0 -13   -1.66    3.84
   3   0  13   56.10    5.59
  -3   0 -13   46.88    9.14
  -4   0 -13   -1.47    4.13
   4   0  13    8.10   10.97
   4   0  13   -0.71    1.77
   6   0  13   -4.48   11.75
  -6   0 -13    2.62    5.39
  -7   0 -13   91.51   13.27
  -8   0 -13   -1.75    5.09
   8   0  13   -3.17   12.88
   9   0  13    6.81   12.17
  -9   0 -13   13.14    7.58
 -10   0 -13    1.27    6.19
  10   0  13   -9.80   12.78
  11   0  13    1.32   12.40
  13  -1 -13    3.77   15.86
 -13  -1  13    1.90    3.09
  13   1 -13   -5.50   14.12
 -13   1  13    2.72    3.06
 -12   1  13   20.00    4.79
  12  -1 -13   -0.58   20.35
  12   1 -13   -5.16   13.86
 -12  -1  13   17.52    5.27
  11   1 -13   -9.99   16.27
  11  -1 -13   12.76   20.92
 -11  -1  13    2.98    3.14
 -11   1  13    5.86    2.88
 -10  -1  13   22.30    5.42
 -10   1  13   21.15    4.79
  10  -1 -13    8.30   16.71
  10   1 -13   -7.75   17.39
   9  -1 -13    3.88   16.69
   9   1 -13   -1.71   15.47
  -8  -1  13    3.52    2.94
  -8   1  13    5.25    2.92
   8  -1 -13    7.58   14.72
   8   1 -13    7.16   12.73
  -7  -1  13   52.47    6.62
   7   1 -13   -0.43    8.66
   6  -1 -13   -0.62    3.57
   6  -1 -13    2.54   10.64
  -6  -1  13    5.57    2.38
   6   1 -13   -2.76    7.78
  -6   1  13    1.92    2.21
   5   1 -13   83.78    8.76
   5  -1 -13   90.95    9.20
  -5  -1  13   98.02    7.90
  -5   1  13   92.39    8.31
   4   1 -13   -0.06    2.52
  -4  -1  13   -1.17    7.10
  -4   1  13   -1.06    1.71
   4  -1 -13    1.37    7.68
  -4  -1  13   -0.47    1.87
   4  -1 -13    4.20    4.57
   3   1 -13  232.50   16.90
   3  -1 -13  244.90   16.61
  -3  -1  13  251.65   13.78
  -3   1  13  228.96   14.23
  -2  -1  13    1.52    7.85
   2  -1 -13   25.05    6.62
   2   1 -13   20.70    6.03
  -2   1  13   23.67    4.82
  -2  -1  13   16.80    3.73
  -1  -1  13   -0.61    6.01
  -1   1  13   -1.59    6.97
  -1  -1  13    2.80    1.94
   1   1 -13    0.50    2.54
   1  -1 -13    1.55    4.74
  -1   1  13    4.20    2.59
   0  -1 -13   68.17    9.43
   0   1 -13   57.20    9.80
   0   1  13   70.46    6.70
   1  -1  13   21.38    4.01
   1  -1  13    7.28    8.18
  -1   1 -13   30.42    7.45
  -1  -1 -13   25.52    7.00
   1   1  13    1.59    9.20
   1   1  13   26.33    4.92
  -2   1 -13   -2.21    2.58
   2  -1  13    2.14    7.89
   2   1  13   -0.24    1.67
   2   1  13    3.73   10.60
   2  -1  13    0.80    1.95
  -2  -1 -13    1.41    5.14
  -3   1 -13   31.85    8.19
  -3  -1 -13   39.79    8.36
   3   1  13    7.92   11.25
   3   1  13   26.15    4.79
   3  -1  13   20.62    3.54
   3  -1  13    9.32    9.99
  -4   1 -13   53.71   10.28
  -4  -1 -13   60.99   10.09
   5   1  13   -1.35    2.05
   5  -1  13   -3.41    7.97
   5   1  13   10.13   10.83
  -5   1 -13   -1.87    3.11
  -5  -1 -13   -2.35    5.40
  -6  -1 -13    2.90    5.95
  -6   1 -13    3.34    4.19
   6   1  13    5.52    2.66
   6  -1  13   -0.04    7.63
   6   1  13    8.41   14.22
  -7  -1 -13   60.58   10.26
  -7   1 -13   47.21   10.36
   7   1  13   31.43    5.61
  -8  -1 -13   46.69    9.78
  -8   1 -13   35.23    9.29
  -9  -1 -13   13.20    7.09
   9  -1  13   -4.96    9.59
   9   1  13   -1.10   10.16
  -9   1 -13    2.95    5.51
 -10   1 -13   14.25    6.76
  10   1  13  -14.17   10.96
  10  -1  13   -4.57    9.96
 -10  -1 -13   15.30    7.68
 -11   1 -13    1.54    5.01
  11  -1  13   -7.11   10.12
 -12   2  13   -0.65    2.44
 -12  -2  13    0.34    2.11
  12   2 -13   -2.13   15.37
  12  -2 -13    4.18   15.81
 -12  -2  13   -1.04    3.63
  11  -2 -13   -0.90   19.80
 -11  -2  13    0.48    3.48
  11   2 -13    5.95   21.07
 -11  -2  13    0.11    2.01
 -11   2  13    1.23    2.30
 -10   2  13    3.85    2.50
  10   2 -13   -3.03   18.17
 -10  -2  13    0.65    1.46
  10  -2 -13    4.81   17.26
 -10  -2  13    1.47    3.29
  -9  -2  13    0.49    3.14
  -9  -2  13    3.36    2.19
   9   2 -13   -5.22   12.97
  -9   2  13    0.86    2.18
   9  -2 -13    0.32   17.10
   8  -2 -13   10.66   15.53
  -8   2  13   16.79    4.38
  -8  -2  13   17.33    4.11
   8   2 -13    2.16   11.68
  -8  -2  13   22.41    5.15
  -7  -2  13    7.51    3.15
   7  -2 -13    3.37   13.57
  -7  -2  13    0.60    1.71
   7  -2 -13    6.88    3.73
  -7   2  13    1.26    2.91
   7   2 -13    5.32   10.66
   6  -2 -13   32.57    6.18
   6  -2 -13    2.79   13.51
  -6   2  13   53.26    7.20
  -6  -2  13   38.45    6.05
  -6  -2  13   45.81    6.18
  -5  -2  13   22.64    4.75
  -5  -2  13   22.43    4.39
   5  -2 -13   13.17   12.86
   5   2 -13   21.20    6.12
  -5   2  13   22.05    4.82
   5   2 -13    4.61    8.47
   5  -2 -13   22.46    6.18
  -4   2  13  125.96    9.96
   4  -2 -13  118.72   11.40
  -4  -2  13  125.97    9.21
  -4  -2  13  125.98    9.22
   4   2 -13  108.68   12.61
  -3  -2  13   -4.90   10.69
  -3  -2  13   20.53    4.34
   3   2 -13    1.15    3.66
  -3   2  13   15.38    4.25
   3  -2 -13   12.61    5.68
   3  -2 -13    9.79    8.99
   2  -2 -13   72.28    9.55
  -2   2  13   66.12    6.92
  -2  -2  13   63.30    6.07
   2   2 -13   65.00   11.34
  -1  -2  13    0.96    1.81
   1   2 -13    2.75    2.54
  -1   2  13    3.14    2.71
   1  -2 -13    2.51    4.94
  -1  -2  13    4.30   11.50
   0  -2 -13  106.11   11.25
   0  -2  13  112.33    7.56
   0   2  13  113.18    9.29
   0   2 -13   85.46   13.51
   1   2  13    0.42    2.19
  -1   2 -13    0.04    2.43
   1   2  13    0.66    7.35
   1  -2  13    5.67   12.78
  -1  -2 -13   -4.49    4.74
  -2   2 -13   73.75   12.90
   2   2  13   64.07    7.07
  -2  -2 -13   90.72   11.24
  -3   2 -13   56.91   11.97
   3   2  13   71.47    7.77
  -3  -2 -13   83.74   10.94
   4  -2  13    5.65   12.71
  -4   2 -13    1.22    3.88
   4   2  13    3.13    8.22
   4   2  13   -1.80    2.13
  -4  -2 -13   -3.19    5.02
  -5   2 -13   42.29   11.24
   5   2  13   44.08    6.89
  -5  -2 -13   69.87   10.27
   6   2  13   13.72    4.11
  -6   2 -13   14.85    6.83
   6  -2  13   12.51   14.96
  -6  -2 -13   22.97    7.61
  -7   2 -13    6.43    5.68
   7   2  13    2.41    3.04
   7  -2  13   -1.55   11.76
  -7  -2 -13    6.86    5.69
  -8  -2 -13    9.56    6.41
  -8   2 -13    2.98    4.66
   8   2  13    5.33    3.09
   8  -2  13   -0.36   13.16
   9   2  13    2.29    2.52
  -9  -2 -13    3.03    5.41
  -9   2 -13   -1.00    4.68
  10  -2  13   -2.45    8.03
 -10   2 -13   13.20    6.97
  11  -3 -13    6.36   17.21
 -11  -3  13    2.58    4.16
 -11  -3  13    4.86    2.72
  11   3 -13  -13.94   17.41
 -10   3  13   15.36    4.37
 -10  -3  13    9.55    4.80
 -10  -3  13   16.68    4.66
  10  -3 -13    5.39   16.35
  10   3 -13    3.94   18.08
  -9   3  13   -2.94    2.58
   9   3 -13   -5.41   15.22
  -9  -3  13   -2.78    2.97
   9  -3 -13    1.72   13.71
  -9  -3  13   -1.23    2.32
   8  -3 -13    3.77   14.34
   8  -3 -13   10.82    4.36
  -8  -3  13    9.38    3.62
   8   3 -13  -13.56   10.32
  -8   3  13    9.38    4.14
  -8  -3  13    3.00    3.22
  -7  -3  13    1.85    2.67
   7   3 -13   -7.13    9.25
  -7   3  13    3.45    2.52
  -7  -3  13    3.46    3.39
   7  -3 -13    6.46    3.23
   7  -3 -13   -2.32   16.34
  -6  -3  13    4.69    3.07
  -6   3  13    2.34    3.25
   6  -3 -13    9.93    4.11
  -6  -3  13    4.74    3.10
   6   3 -13    8.75    8.93
   5  -3 -13    3.21    3.41
   5   3 -13   -0.92    6.49
  -5   3  13   -0.78    2.39
  -5  -3  13    3.88    2.66
  -5  -3  13   -0.77    2.69
   4   3 -13    7.28    4.98
   4  -3 -13   18.02    5.68
  -4  -3  13   12.93   14.35
  -4  -3  13   16.96    4.52
  -4  -3  13   15.36    4.52
  -4   3  13   10.20    4.22
   3   3 -13   16.97    6.67
  -3  -3  13   28.18    6.26
   3  -3 -13   22.72    6.23
  -3  -3  13   34.08    5.62
  -3   3  13   25.02    5.69
  -3  -3  13   24.35   18.63
   2   3 -13   -3.99    2.65
  -2   3  13    4.60    3.05
  -2  -3  13   12.75   25.61
   2  -3 -13   -0.91    3.92
  -2  -3  13    2.16    2.84
   2   3 -13    2.95    2.63
   1  -3 -13   10.18    5.30
   1   3 -13    3.70    2.74
  -1   3  13    4.75    3.03
  -1  -3  13    6.81   22.34
   0   3 -13   85.26    9.95
   0   3  13   74.85    8.20
   0  -3 -13  103.77   10.96
   0  -3  13   25.97   24.60
   1  -3  13   34.08   26.92
  -1   3 -13   50.54    8.13
   1   3  13   55.97    8.16
  -1  -3 -13   42.10    8.46
  -2   3 -13   51.77   11.75
   2  -3  13    6.77   22.71
   2   3  13   76.49    9.58
  -2  -3 -13   64.37    9.56
  -2   3 -13   60.55    8.74
  -3   3 -13    7.53    5.18
  -3  -3 -13   18.46    6.41
   3   3  13    6.89    3.95
  -3   3 -13    9.82    3.57
   3  -3  13  -11.54   18.51
   4  -3  13  -28.19   17.35
  -4   3 -13   -0.04    1.91
  -4   3 -13    4.13    4.56
  -4  -3 -13    0.33    4.12
   4   3  13    3.69    2.95
  -5  -3 -13    6.29    4.99
   5   3  13    3.40    2.94
  -5   3 -13    4.12    2.77
  -5   3 -13    3.72    4.21
   5  -3  13    5.68   20.21
  -6  -3 -13   14.57    5.81
   6  -3  13   -8.15   18.83
  -6   3 -13    3.40    4.93
  -6   3 -13    1.88    3.05
   6   3  13    4.51    3.48
  -7   3 -13    5.91    3.75
  -7  -3 -13   16.61    6.04
   7   3  13   15.80    4.75
   7  -3  13   10.11   19.57
  -7   3 -13   15.15    8.34
  -8   3 -13    0.23    5.12
  -8  -3 -13    9.52    4.88
   8  -3  13   14.24   19.45
   8   3  13   -0.69    3.20
  -9   3 -13    1.96    6.71
  -9  -4  13    0.45    2.77
  -8   4  13   -2.44    3.09
  -8  -4  13   -1.25    2.45
   8  -4 -13    7.63    4.24
   7  -4 -13   13.83    5.22
  -7   4  13   14.88    5.14
  -7  -4  13   11.70    4.58
  -6  -4  13    5.87    3.90
  -6   4  13   -0.25    3.15
   6  -4 -13    4.14    3.84
  -5   4  13    0.39    2.57
   5  -4 -13   -2.43    3.18
  -5  -4  13    3.91    2.90
  -4  -4  13   -2.90    2.59
  -4  -4  13   -0.51    1.70
   4  -4 -13   -0.68    2.84
  -4   4  13    0.59    2.63
  -3   4  13    3.60    3.25
  -3  -4  13    2.05    2.03
   3   4 -13   -4.91    1.84
   3  -4 -13    6.49    4.00
   2   4 -13   60.10    9.42
  -2   4  13   82.78   10.24
   2  -4 -13   74.73   10.66
  -2  -4  13   67.16    7.13
  -1  -4  13   19.85   25.57
   1  -4 -13    4.61    4.07
   1   4 -13    0.24    2.43
  -1   4  13    0.42    2.55
  -1  -4  13    1.32    2.01
   0   4 -13    4.20    3.13
   0   4  13    6.37    3.44
   0  -4 -13    5.65    4.13
   0  -4  13    6.01   24.31
   0  -4  13    2.84    2.28
  -1  -4 -13   20.87    5.83
   1  -4  13   11.38   26.29
   1   4  13   20.23    5.66
   1  -4  13   18.88    4.62
  -1   4 -13   26.11    7.32
   2  -4  13   24.67   28.61
   2   4  13   46.41    8.95
  -2   4 -13   39.09    9.04
  -2  -4 -13   51.75    8.91
   2  -4  13   42.68    6.96
  -3  -4 -13    1.35    3.57
   3  -4  13   25.75   29.39
   3  -4  13   -0.88    2.21
  -3   4 -13   -0.97    2.50
   3   4  13    1.22    3.47
   4  -4  13  -19.46   28.99
   4   4  13   -0.75    2.67
  -4   4 -13    2.44    2.89
   4  -4  13   -0.24    2.85
  -4  -4 -13    3.42    3.60
  -5  -4 -13    3.45    3.94
   5   4  13    8.39    3.88
  -5   4 -13   -0.25    2.41
   5  -4  13  -17.27   30.53
   5  -4  13   -1.45    2.56
  -6  -4 -13   12.44    4.95
   6  -4  13   10.35   32.90
   6   4  13    0.14    3.34
  -6   4 -13    3.42    3.39
  -4   5  13   14.65    4.33
   4  -5 -13    8.23    4.43
   4   5 -13    2.09    4.19
   3  -5 -13   -0.91    3.41
  -3   5  13    3.32    3.61
   3   5 -13   -4.62    2.56
  -3  -5  13    2.23    2.34
   2  -5 -13   15.65    5.54
   2   5 -13   23.05    6.71
  -2   5  13    4.69    3.94
  -2  -5  13   12.23    3.70
   1  -5 -13   13.60    4.86
  -1   5  13   31.77    7.44
  -1  -5  13   13.69    4.05
   1   5 -13   13.61    5.46
   0   5  13   21.16    5.71
   0  -5 -13   16.05    5.32
   0  -5  13   14.59    4.34
   0   5 -13   22.46    6.72
   1  -5  13    5.48    3.03
   1   5  13   -1.97    2.78
  -1   5 -13   -1.72    3.49
  -1  -5 -13   10.70    4.18
  -2  -5 -13    9.00    4.25
   2  -5  13    8.00    3.64
 -13   0  14    2.36    3.37
  13   0 -14  -13.96   12.23
 -12   0  14   13.14    4.45
  12   0 -14   -3.56   13.43
  11   0 -14   -2.69   18.17
 -11   0  14   -1.29    2.78
  10   0 -14   13.14   19.35
 -10   0  14   43.74    6.83
  -9   0  14    1.93    2.80
   9   0 -14   10.54   18.89
  -8   0  14   74.99    7.24
   8   0 -14   10.34   16.15
  -7   0  14   -0.44    1.79
   7   0 -14   -8.96   10.24
  -6   0  14  107.22    8.61
   6   0 -14  105.52   10.01
  -5   0  14    0.77    1.85
   5   0 -14    3.04    9.28
   5   0 -14    1.45    4.55
  -4   0  14   27.53    4.51
   4   0 -14   38.52    7.10
   3   0 -14    2.37    4.93
  -3   0  14   -0.94    4.91
  -3   0  14    0.00    1.84
  -2   0  14   33.47    5.83
   2   0 -14   39.74    7.97
   1   0 -14    1.30    4.63
  -1   0  14    0.32    1.80
  -1   0  14   -1.06    6.11
   0   0 -14   50.32    9.24
   0   0  14   47.25    6.31
  -1   0 -14    1.04    4.87
   1   0  14   -4.42    6.24
   1   0  14   -1.30    1.78
   2   0  14   53.99    5.86
  -2   0 -14   48.95    9.55
  -3   0 -14   -2.15    4.18
   3   0  14    0.17    1.85
   3   0  14   10.79   10.25
  -4   0 -14  205.27   18.08
   4   0  14  200.20   12.29
   4   0  14  200.50   12.30
   5   0  14    6.30   12.23
  -5   0 -14   -0.21    4.74
  -7   0 -14   -9.90    3.71
   7   0  14  -14.59   11.00
  -8   0 -14   56.88   11.71
   8   0  14   -1.25   14.51
   9   0  14   -8.39   13.36
  -9   0 -14   -3.04    5.33
 -10   0 -14    6.26    6.96
  10   0  14  -12.89   12.70
 -13  -1  14    4.96    3.45
  13   1 -14  -17.08   13.25
 -13   1  14    2.00    2.99
  13  -1 -14    4.60   19.47
 -12   1  14    2.46    2.95
 -12  -1  14   -0.19    2.84
  12   1 -14    0.47   16.88
  12  -1 -14   11.50   20.54
 -11   1  14   23.45    5.32
 -11  -1  14   19.51    5.53
  11  -1 -14    0.11   16.42
  11   1 -14  -16.32   12.47
 -10   1  14    1.49    2.95
  10  -1 -14    8.96   18.30
 -10  -1  14   -0.29    2.43
  10   1 -14    3.66   18.32
  -9   1  14   44.16    6.36
   9   1 -14   -5.02   14.28
  -9  -1  14   56.06    7.65
   9  -1 -14   -3.12   14.11
   8  -1 -14   30.72   21.63
  -8  -1  14   45.76    6.94
  -8   1  14   53.80    6.92
   7  -1 -14   19.47   16.48
   7   1 -14    0.36    9.44
  -7   1  14    3.39    2.50
  -7  -1  14    3.60    2.77
  -5   1  14   19.67    4.99
   5   1 -14   19.28    5.42
   5  -1 -14   -0.20    8.34
  -5  -1  14   22.22    4.67
   5  -1 -14   21.19    6.29
  -4  -1  14   -1.68    8.04
   4   1 -14    8.54    3.98
  -4  -1  14   10.44    3.31
   4  -1 -14    5.00    5.02
  -4   1  14    9.63    3.35
   4  -1 -14   -5.00    5.31
   3   1 -14    4.56    3.41
   3  -1 -14    0.36    7.69
  -3  -1  14   11.42    3.48
  -3   1  14    6.63    3.00
   3  -1 -14   14.86    6.17
  -3  -1  14    1.36    6.51
   2  -1 -14    7.10    5.72
  -2  -1  14    0.96    2.20
  -2   1  14    0.75    2.03
  -2  -1  14    2.39    7.71
   2   1 -14    8.76    4.31
  -2   1  14   -2.49    5.88
   1  -1 -14  147.12   13.46
  -1  -1  14  153.55    9.89
  -1   1  14  145.98   10.71
   1   1 -14  143.30   13.86
   0   1 -14   35.90    7.99
   0   1  14   33.37    5.44
   0  -1 -14   29.54    7.76
   1  -1  14    1.63    2.18
   1  -1  14    2.55    7.21
  -1   1 -14    4.93    3.99
  -1  -1 -14    7.70    6.17
   1   1  14    1.14    8.29
   1   1  14    0.72    2.30
   2  -1  14  198.29   11.89
  -2  -1 -14  193.26   16.01
   2   1  14  203.24   12.95
  -2   1 -14  181.13   17.16
   3   1  14    0.49    9.10
   3   1  14   -0.70    1.80
   3  -1  14    6.06   10.77
  -3  -1 -14   -2.49    5.33
  -3   1 -14   -1.50    3.46
  -4   1 -14   40.77    9.23
   4   1  14   31.83    5.21
  -4  -1 -14   58.54   10.00
   4   1  14   16.80   11.80
   5   1  14    8.05   11.25
  -5   1 -14   28.39    8.27
  -5  -1 -14   47.19    9.58
   5   1  14   30.69    5.26
  -6  -1 -14    4.02    5.93
   6   1  14    3.10    2.56
   6  -1  14   -5.19    8.50
  -6   1 -14   -1.74    3.33
   6   1  14    7.43   12.62
   7   1  14  -10.32   11.12
   7   1  14    8.17    3.48
  -7   1 -14   17.95    6.98
   7  -1  14    3.73   10.01
  -7  -1 -14   13.31    7.33
   8   1  14   -2.36   11.39
  -8  -1 -14    4.76    6.33
  -8   1 -14    2.59    4.91
   8  -1  14    2.06    9.73
   9   1  14    4.54   13.86
  -9  -1 -14   11.35    7.14
   9  -1  14   -5.00    8.53
  -9   1 -14    2.58    4.66
  10  -1  14   -0.67   12.47
 -10   1 -14    7.97    5.93
  10   1  14   -0.58   11.46
 -10  -1 -14    7.02    7.41
  12   2 -14  -28.52   14.73
  12  -2 -14  -14.34   13.62
 -12  -2  14    2.59    3.58
 -12   2  14    6.78    2.93
  11  -2 -14    0.50   19.48
  11   2 -14  -11.55   16.48
 -11  -2  14    6.73    4.30
 -11   2  14    9.48    3.33
  10   2 -14    3.83   17.63
 -10   2  14    6.05    2.87
 -10  -2  14    9.81    4.18
  10  -2 -14   14.04   18.81
  -9  -2  14   -0.45    2.96
   9  -2 -14    1.51   15.47
   9   2 -14    5.58   15.37
  -9   2  14    3.21    2.83
  -8  -2  14   27.02    5.81
  -8   2  14   19.33    4.78
   8   2 -14    3.93   12.13
   8  -2 -14    9.10   16.67
   7  -2 -14    0.93   16.45
   7  -2 -14    5.44    3.24
  -7  -2  14   -0.99    2.81
  -7   2  14    1.67    2.91
   7   2 -14    0.69   10.06
  -6  -2  14   12.57    3.85
   6  -2 -14   21.81   17.60
   6   2 -14    0.00    8.90
   6  -2 -14   18.98    5.50
  -6   2  14   19.98    5.22
   5  -2 -14   19.66    5.98
  -5  -2  14   25.43    4.83
  -5   2  14   26.88    5.74
   5   2 -14   23.60    6.26
   5  -2 -14    5.66   11.54
  -4  -2  14   12.88   12.33
  -4  -2  14   30.34    5.17
   4   2 -14   30.75    7.52
   4  -2 -14   41.57    7.82
  -4   2  14   44.44    6.72
  -3  -2  14  245.05   14.34
  -3   2  14  235.40   15.47
   3   2 -14  261.24   21.15
   3  -2 -14  253.99   17.50
   2   2 -14    2.76    3.37
   2  -2 -14    6.34    8.32
  -2  -2  14   -0.11    1.93
  -2  -2  14   11.38   14.46
   2  -2 -14    4.67    5.15
  -2   2  14    0.23    2.28
   1  -2 -14   14.22    6.50
  -1   2  14   -0.76    6.11
  -1  -2  14   14.71    3.37
   1   2 -14    9.95    5.28
  -1  -2  14    0.91   11.43
  -1   2  14    8.57    3.72
   0   2 -14   73.04   12.87
   0  -2  14   90.09    6.88
   0  -2 -14   86.42   11.13
   0   2  14   82.48    8.20
  -1   2 -14   80.77   13.79
   1   2  14   67.61    7.55
  -1  -2 -14   89.66   11.47
   2   2  14    3.81    2.90
  -2  -2 -14   16.44    7.09
   2  -2  14    0.40   10.78
  -2   2 -14   10.99    5.90
   2   2  14   -1.33    6.37
  -3  -2 -14    3.16    5.89
   3   2  14    4.95    7.85
   3  -2  14   -5.53    8.98
   3   2  14    6.50    3.69
  -3   2 -14    3.28    4.64
  -4   2 -14   -0.74    3.72
   4  -2  14  -17.31    8.90
  -4  -2 -14   -2.81    4.31
   4   2  14    0.56    2.47
   5  -2  14   -2.91    9.81
  -5   2 -14    2.93    4.07
  -5  -2 -14    1.15    5.22
   5   2  14   -0.49    2.50
  -6  -2 -14   10.89    6.88
  -6   2 -14    9.42    5.69
   6  -2  14   -0.09   11.67
   6   2  14    4.66    3.52
   7  -2  14    8.71   11.30
   7   2  14    9.92    3.56
  -7  -2 -14   13.09    7.36
  -7   2 -14    7.11    5.49
  -8   2 -14    1.96    4.49
   8  -2  14    0.70   10.45
  -8  -2 -14    6.54    6.21
   8   2  14    8.46    3.72
   9  -2  14   -3.41    8.62
   9   2  14   -0.58    2.66
  -9  -2 -14   -2.02    4.96
  -9   2 -14    4.76    5.36
 -11  -3  14    3.27    4.18
  11   3 -14    4.18   16.68
  11  -3 -14    8.33   16.81
  10   3 -14  -14.17   15.59
 -10   3  14    3.28    2.71
 -10  -3  14    4.62    3.55
  10  -3 -14  -13.16   16.55
   9   3 -14    4.34   14.77
  -9   3  14    1.04    3.32
   9  -3 -14   -3.22   16.07
  -9  -3  14    5.83    3.92
   8  -3 -14   -8.14   15.14
  -8   3  14   -3.78    2.85
  -8  -3  14    6.93    3.83
   8   3 -14   12.90   14.25
   7   3 -14    2.50    9.20
  -7   3  14   13.04    4.44
  -7  -3  14    7.68    3.68
   7  -3 -14   20.53    5.27
   6   3 -14    0.23    7.68
  -6   3  14    2.24    2.93
  -6  -3  14    3.75    3.30
   6  -3 -14    7.20    3.68
  -5  -3  14   36.46    6.30
   5  -3 -14   39.85    7.77
  -5   3  14   43.02    7.45
  -4  -3  14   22.88    5.05
  -4   3  14   24.40    5.71
  -4  -3  14    6.51   13.29
   4  -3 -14   22.53    6.28
   4   3 -14   18.91    7.04
   3   3 -14   55.01   11.44
  -3  -3  14   18.22   19.42
  -3  -3  14   69.39    7.09
  -3   3  14   64.07    8.59
   3  -3 -14   80.35   10.32
  -2   3  14   16.62    5.33
   2  -3 -14   14.08    5.85
  -2  -3  14   17.53   26.25
  -2  -3  14   14.06    3.58
   2   3 -14    4.67    4.52
   1  -3 -14    4.47    4.93
  -1   3  14   -2.38    2.48
   1   3 -14    0.91    4.00
  -1  -3  14   25.57   22.91
   0  -3 -14    8.28    4.89
   0   3  14    3.50    2.77
   0  -3  14   18.90   24.06
   0   3 -14    0.96    3.74
   1  -3  14   34.44   24.75
  -1   3 -14    5.91    4.08
   1   3  14   13.85    4.47
  -1  -3 -14   13.81    6.19
  -2   3 -14   42.60   10.91
  -2  -3 -14   52.04    9.04
   2   3  14   42.77    7.31
   2  -3  14    3.40   20.40
  -3   3 -14   18.15    7.87
   3  -3  14  -18.46   17.92
   3   3  14   46.90    8.13
  -3  -3 -14   33.53    7.72
   4  -3  14   -6.22   19.21
  -4  -3 -14    1.16    4.51
   4   3  14   -1.91    2.31
  -4   3 -14    2.07    4.23
   5  -3  14    3.39   17.79
   5   3  14    2.99    3.12
  -5  -3 -14   11.75    5.72
  -5   3 -14   -3.30    3.81
   6   3  14   30.43    6.40
  -6   3 -14   17.51    8.58
   6  -3  14   19.87   20.61
  -6  -3 -14   42.02    8.53
   7  -3  14   -7.47   17.26
   7   3  14   26.86    6.30
  -7  -3 -14   20.95    6.82
  -7   3 -14   16.70    8.71
  -8   3 -14    2.95    6.01
  -8  -3 -14   10.77    5.50
   8   3  14   -4.64    2.50
   8  -3  14   -1.65   16.37
   8  -4 -14   11.93    4.46
  -8   4  14    2.25    3.39
  -7   4  14    2.40    3.85
   7  -4 -14    7.81    4.00
  -6  -4  14   -4.96    3.06
   6  -4 -14    2.93    2.89
  -6   4  14    3.11    3.00
  -5  -4  14    0.03    3.58
  -5   4  14    1.97    3.07
   5  -4 -14   10.93    4.17
   4  -4 -14   -2.14    2.53
  -4   4  14    3.41    3.06
  -3   4  14    2.40    3.59
   3  -4 -14   13.98    5.54
  -3  -4  14    8.53    3.09
   2  -4 -14    5.53    4.63
  -2   4  14    5.21    3.89
  -2  -4  14   41.21   27.00
  -2  -4  14    2.84    2.58
  -1   4  14  101.86   10.37
   1  -4 -14   79.75   11.27
  -1  -4  14   89.24    8.78
   0  -4  14   -0.21    2.22
   0  -4  14   16.70   25.03
   0   4  14   -0.44    2.77
   0  -4 -14    2.36    3.33
  -1  -4 -14   18.60    5.73
   1  -4  14   21.83   28.04
   1   4  14   12.20    4.71
   1  -4  14   11.75    4.01
  -2  -4 -14   20.85    6.37
   2   4  14   21.70    6.46
   2  -4  14   13.59    4.31
   2  -4  14   38.27   30.02
  -3  -4 -14    0.65    4.51
   3   4  14    6.44    3.86
   3  -4  14   56.22   32.22
   4  -4  14   15.01   29.76
   4   4  14   -2.79    3.23
  -4  -4 -14    5.10    4.25
   5  -4  14  -36.71   30.29
  -5  -4 -14   10.56    5.20
  -5   4 -14   16.31    7.03
   5   4  14   12.97    4.73
  13   0 -15   -4.50   16.23
 -13   0  15   -1.74    2.59
 -12   0  15    2.81    3.18
  12   0 -15  -11.13   13.16
 -11   0  15    0.35    2.60
  11   0 -15   11.36   18.51
 -10   0  15    1.69    2.46
  10   0 -15   -3.84   17.29
   9   0 -15   24.15   22.39
  -8   0  15   -0.72    2.23
   8   0 -15   -5.34   12.40
  -7   0  15    1.81    2.38
   7   0 -15    7.12   11.85
   6   0 -15   -2.64    8.21
   6   0 -15    0.51    4.52
  -6   0  15    1.38    2.17
   5   0 -15    1.43    5.05
   5   0 -15    1.14    6.68
  -5   0  15    1.66    2.02
   4   0 -15    1.50   11.04
  -4   0  15   -2.53    1.50
   4   0 -15   -1.35    4.59
  -3   0  15  364.16   19.85
   3   0 -15  324.41   21.46
  -2   0  15   -0.60    1.88
   2   0 -15    6.02    5.83
  -2   0  15    2.00    4.95
   1   0 -15    6.39    5.63
  -1   0  15   -0.41    1.90
  -1   0  15    0.45    6.01
   0   0 -15   -4.06    4.61
   0   0  15    4.84    6.03
   0   0  15   -1.10    2.13
   1   0  15   41.93    5.79
  -1   0 -15   36.41    9.03
   2   0  15    1.83    2.31
  -2   0 -15    0.74    5.23
   2   0  15   -1.83    8.56
  -3   0 -15   34.49    9.57
   3   0  15   33.09    5.17
   4   0  15    2.24    2.40
  -4   0 -15   -0.73    5.50
   4   0  15    2.37   11.92
   5   0  15    9.40   12.83
  -5   0 -15   45.72   10.52
  -6   0 -15   -1.30    4.80
   6   0  15   -0.24   14.50
   7   0  15    3.48   15.21
  -7   0 -15   26.99    9.61
  -8   0 -15    4.75    6.30
   8   0  15    1.73   13.81
  -9   0 -15   16.96    8.50
   9   0  15   -2.06   12.63
 -10   0 -15  -16.53    5.23
  12  -1 -15   -1.99   16.66
 -12   1  15    1.66    2.73
 -12  -1  15    1.83    3.01
  12   1 -15  -12.90   13.79
 -11  -1  15    5.99    4.09
 -11   1  15   14.30    4.13
  11  -1 -15    0.32   15.97
  11   1 -15  -12.33   14.33
  10  -1 -15   20.95   22.98
 -10  -1  15   -1.12    3.11
  10   1 -15  -15.38   16.93
 -10   1  15    1.82    2.75
  -9   1  15   -1.90    2.19
   9   1 -15  -10.18   13.63
   9  -1 -15    9.86   17.68
  -9  -1  15    5.31    3.21
  -8  -1  15   68.85    7.40
  -8   1  15   50.90    7.19
  -7  -1  15   13.73    4.09
   7  -1 -15   -3.60   11.59
  -7   1  15    9.51    3.46
   7   1 -15   -7.09    7.83
  -5  -1  15   41.29    6.18
  -5   1  15   35.18    6.44
   5   1 -15   27.13    6.40
   5  -1 -15    4.10   10.57
   5  -1 -15   29.30    6.78
   4  -1 -15    5.85    5.72
  -4  -1  15    2.70    7.93
   4  -1 -15   -6.54    6.47
  -4  -1  15   -0.70    1.92
   4   1 -15   -1.86    3.39
  -4   1  15    1.47    2.44
   3   1 -15   59.39    9.27
   3  -1 -15   84.60   10.79
  -3   1  15   71.66    7.47
  -3  -1  15   75.09    6.97
  -2  -1  15    0.65    7.43
   2  -1 -15   21.50    7.47
  -2  -1  15   25.18    4.44
   2   1 -15   18.19    6.00
  -2   1  15   18.53    4.68
  -1   1  15  176.65   12.51
   1   1 -15  182.24   16.51
   1  -1 -15  199.50   16.07
  -1  -1  15  196.77   11.92
   0   1 -15    2.46    3.23
   0  -1 -15    2.87    6.00
   0   1  15   -2.17    8.42
   0   1  15   -2.40    1.85
   0  -1  15    0.58    1.49
   0  -1  15    0.04    5.62
  -1  -1 -15   18.45    7.30
   1   1  15    1.88    6.40
   1   1  15   17.58    4.53
  -1   1 -15   12.45    5.06
   1  -1  15    2.61    8.44
   1  -1  15    5.44    2.79
   2   1  15  183.51   12.46
   2  -1  15  173.94   11.33
  -2   1 -15  157.66   16.37
  -2  -1 -15  174.40   15.54
  -3  -1 -15   75.88   10.82
   3   1  15   61.86    6.60
  -3   1 -15   49.22   10.21
   4  -1  15    4.30   11.31
   4   1  15   -8.40    8.03
  -4  -1 -15   15.92    7.27
  -4   1 -15   14.56    5.95
   4   1  15   11.64    3.71
   5  -1  15    4.40   11.14
  -5  -1 -15   48.61    9.68
   5   1  15   24.47    4.65
  -5   1 -15   36.58    9.17
   5   1  15   -1.67   10.38
  -6   1 -15   -5.70    2.89
   6  -1  15   -0.80    9.22
  -6  -1 -15   -2.87    5.12
   6   1  15   15.96   13.75
   6   1  15    3.20    2.42
  -7  -1 -15   -0.64    6.46
   7   1  15    3.12   12.33
   7  -1  15   -4.22    9.41
  -7   1 -15    4.24    5.15
   8  -1  15   -5.45   10.09
  -8  -1 -15   -3.59    4.98
   8   1  15   -5.98   10.35
  -8   1 -15    1.70    4.65
  -9  -1 -15   -8.91    5.28
   9   1  15    0.11   12.10
  -9   1 -15    0.48    5.08
   9  -1  15    0.49   11.02
  12  -2 -15   25.25   21.16
  12   2 -15   -0.70   16.91
 -12  -2  15    3.71    3.95
 -11   2  15   13.86    3.99
  11  -2 -15   -4.95   14.03
 -11  -2  15    9.55    5.15
  11   2 -15    2.81   17.56
  10   2 -15   -5.85   19.55
 -10  -2  15    1.74    3.35
  10  -2 -15    4.81   16.74
 -10   2  15    1.07    2.55
  -9   2  15    7.00    3.54
   9   2 -15   -5.21   14.26
   9  -2 -15    3.61   17.24
  -9  -2  15    9.93    4.02
   8  -2 -15   -1.85   13.97
   8   2 -15   10.78   12.29
  -8  -2  15    6.02    3.56
  -8   2  15   13.69    4.53
  -7  -2  15   31.29    6.07
   7  -2 -15   45.81    7.04
  -7   2  15   43.61    7.55
  -6   2  15   45.38    7.47
   6  -2 -15   41.21    7.29
  -6  -2  15   31.41    5.73
   5  -2 -15    1.42    3.74
  -5  -2  15    0.67    2.25
   5   2 -15    2.90    3.14
   5  -2 -15   -2.27   12.21
   5   2 -15   -0.70    8.98
  -5   2  15    0.77    3.00
  -4  -2  15    7.04    9.93
  -4  -2  15    6.17    2.96
   4   2 -15    8.28    3.91
   4  -2 -15   13.13    5.91
  -4   2  15    8.24    3.54
   4  -2 -15   -5.17    8.27
   3  -2 -15   -1.27    4.34
  -3  -2  15    3.61    2.43
   3  -2 -15    2.84    9.35
  -3  -2  15    4.43   11.06
   3   2 -15   -0.84    2.40
  -3   2  15    0.05    2.64
  -2  -2  15   -1.79   11.96
   2  -2 -15    6.01    7.86
  -2  -2  15   28.89    4.84
   2  -2 -15   17.70    7.03
  -2   2  15   20.85    5.04
   2   2 -15   19.09    6.66
  -1  -2  15  299.22   15.31
  -1   2  15  256.95   16.55
   1  -2 -15  252.84   18.78
   1   2 -15  258.71   22.79
   0   2  15    9.33    3.79
   0  -2  15   10.66   12.42
   0   2  15    3.55    6.82
   0  -2 -15    9.34    6.59
   0   2 -15   11.92    5.28
   1   2  15   33.85    5.93
  -1   2 -15   26.47    8.54
  -1  -2 -15   36.90    8.39
  -2  -2 -15    6.54    6.30
   2  -2  15   -0.59   11.07
  -2   2 -15    6.26    4.69
   2   2  15    5.60    3.06
   2   2  15   -3.17    7.22
  -3  -2 -15  100.67   11.78
  -3   2 -15   56.62   12.41
   3   2  15   82.35    8.38
   4   2  15   70.54    7.92
  -4   2 -15   61.70   13.35
  -4  -2 -15   66.17   11.09
  -5  -2 -15   24.12    8.38
  -5   2 -15   14.44    7.85
   5   2  15   18.79    5.28
   6   2  15    5.35    3.47
  -6   2 -15   -0.48    3.79
   6  -2  15    6.02   12.21
  -6  -2 -15   -1.41    5.64
  -7   2 -15    8.41    5.92
   7  -2  15   -0.56   11.89
   7   2  15   -0.37    2.64
  -7  -2 -15    2.99    5.97
  -8   2 -15   11.35    6.07
   8  -2  15   -4.23    9.75
  -8  -2 -15   14.65    7.44
   8   2  15    7.35    3.63
  -9  -2 -15   -4.95    5.17
  -9   2 -15    0.30    5.31
 -10   3  15    1.47    2.92
  10   3 -15    6.57   18.45
  10  -3 -15   -0.06   16.24
 -10  -3  15    1.90    3.29
  -9  -3  15    0.75    3.10
   9   3 -15   13.48   15.99
  -9   3  15   -0.37    2.77
   9  -3 -15   -4.48   17.98
  -8   3  15    2.97    3.20
   8   3 -15  -15.71    9.06
  -8  -3  15    0.24    3.12
   7   3 -15    4.79   10.35
   7  -3 -15    0.42    2.95
  -7   3  15    3.81    3.35
  -7  -3  15    7.79    3.71
  -6  -3  15   10.17    4.16
  -6   3  15   11.75    4.31
   6   3 -15   -6.04    6.64
   6  -3 -15   17.21    4.78
  -5  -3  15    7.41    3.90
   5   3 -15    3.58    9.51
   5  -3 -15    7.16    4.62
  -5   3  15    8.79    3.95
  -4  -3  15  130.90   10.70
  -4   3  15  126.87   11.50
   4  -3 -15  139.09   12.76
   4   3 -15  134.32   15.61
  -3  -3  15   -1.19    2.36
   3  -3 -15    1.20    4.04
  -3   3  15    0.92    2.86
  -3  -3  15    8.76   17.86
   3   3 -15    1.33    3.61
   2  -3 -15   18.07    6.43
   2   3 -15   16.70    5.64
  -2   3  15    8.89    4.25
  -2  -3  15    0.90   26.04
   1  -3 -15  101.42   11.51
   1   3 -15   77.13   14.14
  -1   3  15   88.36    9.36
   0   3 -15    3.83    3.89
   0  -3  15   -4.29   22.66
   0  -3 -15    2.88    4.62
   0   3  15    4.54    3.16
   1  -3  15    3.40   22.38
  -1   3 -15    5.89    4.89
  -1  -3 -15    2.49    4.98
   1   3  15    8.37    3.51
  -2  -3 -15    6.52    5.83
   2   3  15   11.70    4.11
  -2   3 -15    4.22    4.22
   2  -3  15  -18.17   21.24
  -3   3 -15    2.42    3.90
   3  -3  15    6.37   19.88
  -3  -3 -15    4.60    5.22
   3   3  15    2.57    3.23
  -4  -3 -15    8.68    5.70
  -4   3 -15    3.62    4.06
   4  -3  15  -22.33   15.93
   4   3  15   10.30    4.70
  -5   3 -15    3.65    5.42
   5  -3  15  -15.23   18.56
  -5  -3 -15    0.65    4.62
   5   3  15    3.38    2.77
   6   3  15   22.65    6.02
  -6   3 -15   17.43    8.95
  -6  -3 -15   30.26    7.58
   6  -3  15   -8.66   19.51
   7   3  15    1.76    3.31
  -7   3 -15    2.40    5.75
  -7  -3 -15   12.91    5.72
   7  -3  15   22.37   21.56
  -7  -4  15   -0.55    3.52
  -7   4  15    4.91    3.71
   7  -4 -15    5.81    3.62
   6  -4 -15   24.07    7.16
  -6   4  15   22.59    6.13
  -6  -4  15   11.25    4.73
  -5  -4  15   10.58    4.61
  -5   4  15    8.73    4.04
   5  -4 -15    6.52    3.91
   4  -4 -15    1.34    3.16
  -4   4  15   -0.99    2.98
   3   4 -15    4.05    4.50
   3  -4 -15    3.83    3.42
  -3   4  15    2.33    2.98
  -2   4  15   29.68    6.66
   2  -4 -15   35.93    8.24
  -2  -4  15  -14.80   23.53
   2   4 -15   23.49    7.16
  -1   4  15   -5.31    2.84
   1   4 -15    0.48    3.51
  -1  -4  15   20.07   29.37
   1  -4 -15    4.03    3.51
   0   4  15   26.90    6.16
   0  -4  15    5.70   25.49
   0   4 -15   16.05    6.65
   0  -4 -15   32.03    7.25
   1  -4  15   24.07   27.77
  -1   4 -15    7.86    4.91
   1   4  15    1.91    3.24
  -1  -4 -15   15.22    5.27
   2  -4  15   37.50   29.49
  -2  -4 -15    7.82    4.49
  -2   4 -15   -1.26    3.53
   2   4  15   -0.39    3.27
   3  -4  15   44.90   32.86
  -3  -4 -15    7.46    4.64
   3   4  15    1.45    3.69
  -3   4 -15   -1.39    3.87
  -4  -4 -15   10.65    5.20
   4  -4  15    2.95   30.91
  -4   4 -15   -0.61    3.99
   4   4  15    7.13    5.01
 -12   0  16   39.19    6.94
  12   0 -16   10.45   24.73
 -11   0  16    1.96    2.86
  11   0 -16    9.40   21.27
  10   0 -16   25.13   25.66
   9   0 -16  -11.40   16.72
  -9   0  16   -1.16    2.26
   7   0 -16   -8.15    8.55
  -7   0  16    2.24    2.52
   6   0 -16    3.87   10.48
  -6   0  16   39.81    5.98
  -5   0  16    3.32    2.31
   5   0 -16    3.43    9.88
   5   0 -16   -1.49    4.55
  -3   0  16    2.61    5.05
   3   0 -16    0.45    5.05
  -3   0  16    1.97    2.43
  -2   0  16   39.11    6.38
   2   0 -16   25.02    7.65
  -1   0  16   -1.96    6.04
   1   0 -16    5.80    6.45
  -1   0  16    3.31    2.28
   0   0  16    6.30    2.96
   0   0  16   -1.36    6.00
   0   0 -16    8.89    6.69
   1   0  16   -1.02    6.49
   1   0  16    1.61    1.94
  -1   0 -16    1.89    5.51
   2   0  16  200.26   13.52
  -2   0 -16  289.07   21.29
   3   0  16    2.80   11.37
   3   0  16    0.08    2.02
  -3   0 -16    3.24    5.63
   4   0  16   15.86   11.97
  -4   0 -16    4.20    5.67
   5   0  16    3.13   12.83
  -5   0 -16    4.80    6.17
  -6   0 -16    1.01    5.74
   6   0  16    3.95   13.61
   7   0  16    6.47   15.10
  -7   0 -16   -5.45    4.53
   8   0  16   -3.89   14.92
  -8   0 -16    5.87    6.84
   9   0  16   -5.04   14.87
  -9   0 -16   -4.23    7.21
 -12  -1  16   16.10    5.47
  12  -1 -16   -4.93   16.12
 -12   1  16   16.14    4.72
  12   1 -16   -7.87   17.05
  11   1 -16   -5.68   15.29
 -11   1  16    3.78    2.71
  11  -1 -16   10.72   20.33
 -11  -1  16   -1.44    2.90
  10   1 -16    5.48   19.90
 -10  -1  16   41.77    7.32
  10  -1 -16   14.97   21.11
  -9  -1  16   35.63    6.87
  -9   1  16   36.25    6.22
   9  -1 -16   24.66   21.49
   9   1 -16   -1.78   14.57
  -8   1  16   -0.61    2.72
  -8  -1  16   -2.57    2.41
   8  -1 -16   -2.23   13.98
   8   1 -16   -7.29   11.95
  -7   1  16   11.46    3.76
   7   1 -16    1.35    9.77
   7  -1 -16   -0.63   11.35
  -7  -1  16   24.32    5.22
   6   1 -16    1.43    9.16
   6  -1 -16   16.24    5.82
  -6   1  16   19.25    4.48
  -6  -1  16   12.83    4.13
   6  -1 -16    4.06   13.17
   5  -1 -16    1.91    4.61
  -5   1  16   10.48    3.94
   5   1 -16    8.41    4.95
   5  -1 -16    1.20    9.95
  -5  -1  16    4.31    2.83
   5   1 -16    3.37    8.22
   4  -1 -16    6.14    5.59
   4  -1 -16   -0.25    7.63
  -4   1  16    3.59    2.97
  -4  -1  16   -1.32    6.58
  -4  -1  16    1.28    2.36
   4   1 -16   -2.79    3.67
  -3  -1  16  118.08    9.31
  -3   1  16  119.40   10.01
   3  -1 -16  111.30   12.38
   3   1 -16  110.31   12.46
   2   1 -16   57.22    9.89
   2  -1 -16   93.13   11.83
  -2   1  16   73.21    7.66
  -2  -1  16   89.81    7.60
   1   1 -16    4.49    4.29
   1  -1 -16    2.85    6.15
  -1  -1  16    0.21    1.78
  -1   1  16   -1.27    4.98
  -1  -1  16   -2.21    5.62
  -1   1  16    2.84    2.22
   0  -1 -16   34.32    8.82
   0   1  16   26.21    5.35
   0  -1  16   22.27    4.23
   0   1 -16   34.42    8.33
   2   1  16   -2.91    7.29
  -2  -1 -16   25.79    7.84
  -2   1 -16   13.29    6.13
   2  -1  16    8.70    9.43
   2   1  16   33.13    5.86
   3  -1  16    2.73    9.54
   3   1  16   31.14    5.67
  -3   1 -16   10.56    5.76
  -3  -1 -16   30.71    8.56
   3   1  16   -4.96    7.24
   4  -1  16   10.27   11.52
  -4   1 -16   27.98    8.83
  -4  -1 -16   38.46    9.31
   4   1  16   33.79    5.55
   5  -1  16   -2.45    8.72
  -5  -1 -16   16.82    7.56
   5   1  16    4.76   10.88
   5   1  16    6.29    3.55
  -5   1 -16   11.98    5.65
   6   1  16    4.89    2.51
  -6   1 -16    3.34    4.85
  -6  -1 -16    6.98    6.89
   6   1  16   15.79   13.94
   6  -1  16   11.96   11.85
   7   1  16    4.42   11.24
  -7  -1 -16   21.37    8.37
   7  -1  16    0.25   10.41
  -7   1 -16   11.28    7.24
   8   1  16    8.75   13.13
  -8   1 -16    2.36    5.22
  -8  -1 -16    5.20    6.45
   8  -1  16   -9.12   10.41
  -9  -1 -16    2.16    6.35
   9  -1  16    5.49   11.55
  -9   1 -16   -0.48    5.13
   9   1  16    0.20   11.49
 -11  -2  16    8.81    4.51
  11   2 -16  -10.02   16.53
  11  -2 -16    3.49   15.97
 -11   2  16   14.15    3.96
 -10   2  16    1.36    2.43
  10   2 -16    8.26   18.42
 -10  -2  16    5.62    3.63
  10  -2 -16  -10.75   16.01
  -9   2  16    4.30    2.90
   9   2 -16    2.21   12.35
   9  -2 -16   13.77   17.80
  -9  -2  16    9.24    4.13
  -8   2  16    9.32    3.62
   8   2 -16   -0.07   12.04
   8  -2 -16    9.32   16.78
  -8  -2  16    4.23    3.75
   7  -2 -16   15.97   19.31
   7  -2 -16   31.50    5.99
  -7   2  16   40.28    7.59
  -7  -2  16   30.73    5.75
   6  -2 -16    6.27   13.74
   6   2 -16    3.17    7.99
  -6  -2  16   19.40    4.60
  -6   2  16   17.70    5.27
   6  -2 -16   16.90    5.74
  -5  -2  16    3.58    2.67
   5  -2 -16   -3.82   10.81
  -5   2  16   -0.33    2.72
   5  -2 -16    6.63    4.34
   5   2 -16   -0.51    8.93
  -4  -2  16   -0.70    9.65
   4  -2 -16    1.14    9.71
  -4  -2  16   15.84    4.51
  -4   2  16   14.67    4.44
   4  -2 -16   21.67    6.49
   4   2 -16   19.48    6.34
   3  -2 -16   -3.48    9.67
   3  -2 -16   12.33    5.72
   3   2 -16   11.06    5.21
  -3  -2  16    8.75    3.04
  -3  -2  16    0.48   11.09
  -3   2  16    4.75    3.25
  -2  -2  16   -3.77   10.55
  -2  -2  16   12.28    3.69
   2  -2 -16    3.51    9.29
   2   2 -16    5.03    3.99
   2  -2 -16    9.30    5.99
  -2   2  16   10.06    3.80
  -1  -2  16    8.63    2.57
  -1   2  16    0.36    2.83
   1  -2 -16    1.04    5.35
   1   2 -16    3.42    3.65
  -1  -2  16    8.13   11.15
  -1   2  16    4.89    5.91
   0  -2 -16  144.99   14.08
   0   2 -16  140.80   16.35
  -1   2 -16    9.29    5.02
  -1  -2 -16   19.06    7.34
   1   2  16   13.68    4.52
   1  -2  16   -2.35   10.81
  -2  -2 -16   11.98    6.97
  -2   2 -16   20.72    7.51
   2   2  16   27.32    5.57
   2   2  16    1.49    5.55
   2  -2  16   -1.15   10.59
  -3  -2 -16    7.82    6.81
   3  -2  16    7.10   13.14
  -3   2 -16    9.40    5.61
   3   2  16   14.47    4.57
  -4  -2 -16   33.45    9.31
  -4   2 -16   22.82    9.09
   4   2  16   19.80    5.21
   5   2  16   23.66    5.44
  -5  -2 -16   27.28    8.77
  -5   2 -16   26.96    9.17
   6  -2  16  -16.48   11.21
  -6   2 -16    5.40    5.15
  -6  -2 -16   15.46    7.42
   7  -2  16    6.11   12.57
  -7   2 -16    1.10    4.69
  -7  -2 -16   14.05    7.78
   7   2  16   10.61    3.99
  -8  -2 -16   13.84    7.82
   8   2  16   29.94    6.03
   8  -2  16    0.01    7.83
  -8   2 -16    6.22    6.27
  -9   3  16   -0.24    2.90
  -9  -3  16    5.30    3.91
   9   3 -16    0.03   14.44
  -8  -3  16    0.31    2.96
   8   3 -16   10.63   12.59
  -8   3  16    0.32    3.17
   7   3 -16    1.30    9.41
  -7   3  16   -1.27    3.08
   7  -3 -16    7.50    3.31
  -7  -3  16    2.31    3.20
   6   3 -16    3.68    8.67
  -6  -3  16    0.38    3.41
   6  -3 -16    8.28    4.14
  -6   3  16    3.33    3.29
  -5  -3  16   24.03    5.32
   5  -3 -16   26.59    6.52
  -5   3  16   19.04    5.41
   5   3 -16    7.94    9.59
  -4  -3  16   11.74    3.94
  -4  -3  16    5.31   13.62
   4   3 -16   12.51    5.33
  -4   3  16   16.56    5.39
   4  -3 -16    5.17    4.46
  -3  -3  16   89.48    8.15
   3  -3 -16   87.36   11.59
   3   3 -16   60.61   12.58
  -3   3  16   59.55    8.67
   2  -3 -16    4.10    4.44
   2   3 -16    3.87    4.17
  -2   3  16    6.12    3.59
  -2  -3  16   25.24   27.50
  -1  -3  16   35.13   27.23
   1   3 -16    0.40    3.85
   1  -3 -16    9.44    5.33
  -1   3  16    9.01    3.94
   0   3  16   45.96    8.09
   0   3 -16   34.72   10.44
   0  -3 -16   55.16    9.89
  -1  -3 -16   16.26    6.43
   1   3  16    7.37    3.92
  -1   3 -16    5.84    4.71
   1  -3  16    5.00   22.85
   2   3  16   21.05    5.65
  -2   3 -16   12.59    5.58
  -2  -3 -16   23.53    7.34
   2  -3  16   15.68   19.59
  -3   3 -16   13.01    5.83
  -3  -3 -16   13.10    6.41
   3  -3  16   17.83   21.08
   3   3  16   12.89    4.65
  -4   3 -16   -1.00    3.32
  -4  -3 -16    0.69    4.45
   4   3  16   -0.71    2.70
   4  -3  16   -3.42   18.92
  -5  -3 -16    3.94    4.46
  -5   3 -16    0.61    5.35
   5  -3  16   -6.74   19.85
   5   3  16    0.91    3.44
  -6  -3 -16    5.33    4.76
   6   3  16    6.65    3.93
   6  -3  16    4.82   20.25
  -6   3 -16   -0.82    4.53
  -6   4  16    0.78    3.01
   6  -4 -16    8.46    3.71
  -6  -4  16    7.67    4.00
   5  -4 -16    8.53    4.04
  -5   4  16    8.55    4.12
   4  -4 -16   15.97    5.45
  -4   4  16   14.40    4.81
   3   4 -16   -1.13    3.73
   3  -4 -16    9.62    4.16
  -3  -4  16   -2.42   13.52
  -3   4  16    0.76    2.62
  -2  -4  16    7.97   23.21
  -2   4  16    6.39    4.24
   2  -4 -16   14.40    4.99
   2   4 -16   15.40    6.68
  -1   4  16    8.75    3.78
   1   4 -16    3.10    4.15
  -1  -4  16   12.07   30.82
   1  -4 -16    4.69    3.39
   0  -4  16   29.78   26.58
   0  -4 -16   10.68    4.74
   0   4 -16   10.37    6.33
   0   4  16    7.08    3.65
   1   4  16    1.94    2.96
  -1  -4 -16    3.99    3.65
  -1   4 -16    0.47    4.34
   1  -4  16   36.02   28.98
   2  -4  16   21.31   31.28
   2   4  16    9.36    4.40
  -2  -4 -16    3.05    3.84
  -2   4 -16   -0.73    3.87
   3  -4  16   26.33   31.34
  -3  -4 -16    5.34    4.30
  -3   4 -16   -1.00    3.36
   3   4  16    2.81    3.81
  12   0 -17   11.30   24.48
 -11   0  17    5.64    3.11
  11   0 -17   13.16   23.36
  10   0 -17    6.42   19.74
 -10   0  17    2.32    2.89
   9   0 -17   -3.76   15.90
  -9   0  17    1.38    2.59
   8   0 -17   -1.44   12.26
  -8   0  17    1.59    2.68
   7   0 -17    7.32   14.49
  -7   0  17   20.65    4.92
   6   0 -17   -0.10   10.63
  -6   0  17    0.97    2.22
   4   0 -17   -4.94    8.72
   4   0 -17   -3.53    4.60
  -4   0  17   -0.55    1.78
  -3   0  17   13.16    4.11
   3   0 -17   19.89    7.38
  -3   0  17    2.20    5.40
  -2   0  17    0.63    6.44
   2   0 -17   -2.50    5.18
  -2   0  17    0.80    2.48
  -1   0  17  378.54   21.77
   1   0 -17  429.37   27.03
   0   0  17    3.05    2.30
   0   0 -17    4.46    6.53
   0   0  17    0.79    6.68
   1   0  17   21.00    4.95
   1   0  17    5.61    7.65
  -1   0 -17   18.80    8.15
   2   0  17    1.00    2.53
  -2   0 -17   -0.34    5.22
   2   0  17    1.18    8.39
   3   0  17  122.94    9.65
  -3   0 -17  105.83   15.03
  -4   0 -17    1.57    6.23
   4   0  17   -2.03   12.40
  -5   0 -17   -0.77    5.40
   5   0  17   11.84   14.59
   6   0  17    4.25   13.23
  -6   0 -17    3.54    6.38
   7   0  17   27.43   17.60
  -7   0 -17   12.95    7.34
   8   0  17    5.09   14.56
  -8   0 -17  -11.11    5.79
 -11  -1  17   11.79    4.87
 -11   1  17   15.45    4.53
  11  -1 -17   -2.78   18.95
  11   1 -17  -11.44   15.86
  10  -1 -17   14.12   19.53
  10   1 -17  -16.76   14.54
 -10  -1  17   12.09    4.15
 -10   1  17    8.28    3.41
  -9   1  17   -1.55    2.26
  -9  -1  17    2.96    2.94
   9   1 -17   -3.82   11.73
   9  -1 -17   -2.63   17.03
  -8  -1  17    1.31    2.96
  -8   1  17    0.48    2.43
   8   1 -17   -2.06   10.23
   8  -1 -17    9.86   16.42
   7   1 -17   -2.59    9.74
  -7   1  17    3.20    3.01
  -7  -1  17    6.91    3.00
   7  -1 -17    2.09   12.73
  -6  -1  17   26.97    5.41
  -6   1  17   21.90    4.84
   6   1 -17    1.87    8.48
   6  -1 -17   24.65    6.46
   6  -1 -17    1.33   11.38
  -5  -1  17    9.64    3.45
   5   1 -17   -0.58    8.53
  -5   1  17   13.48    4.28
   5  -1 -17   -4.07    9.05
   5  -1 -17    7.04    4.96
   5   1 -17   16.13    5.77
  -4   1  17  119.16   10.62
   4   1 -17   84.59   11.93
   4  -1 -17   97.40   11.27
  -4  -1  17  115.72    9.41
  -3   1  17   17.18    4.48
  -3  -1  17   17.17    4.05
   3  -1 -17    3.96    9.41
  -3  -1  17   -0.23    8.68
   3   1 -17    3.09    4.49
   3  -1 -17   17.32    7.27
   2   1 -17   -5.65    3.37
   2  -1 -17    3.35    5.65
  -2   1  17   -2.68    5.09
  -2   1  17    2.12    2.77
  -2  -1  17    1.71    6.28
  -2  -1  17    3.78    2.48
  -1  -1  17   65.46    6.63
   1  -1 -17   71.43   11.16
  -1   1  17   70.68    7.46
   1   1 -17   63.15   10.80
   0  -1  17    0.85    5.22
   0   1  17   -0.83    2.54
   0   1 -17    1.72    4.79
   0   1  17   -7.13    6.98
   0  -1  17    1.91    2.20
   0  -1 -17    0.99    5.88
  -1   1 -17   53.76   10.85
   1   1  17   61.53    7.89
  -1  -1 -17   84.10   11.86
   2   1  17   51.19    7.27
  -2  -1 -17   58.72   10.60
  -2   1 -17   49.44   10.31
  -3  -1 -17   -0.44    5.71
   3  -1  17   -3.35    7.99
  -3   1 -17    3.09    4.02
   3   1  17    1.70    2.45
   3   1  17    1.71    2.44
  -4  -1 -17   67.68   11.63
   4   1  17   69.04    7.56
  -4   1 -17   52.96   11.28
   5   1  17  -11.30    9.53
  -5   1 -17   14.24    6.42
  -5  -1 -17   15.46    7.93
   5   1  17   14.62    4.54
   5  -1  17   -0.02   10.09
   6   1  17   18.38   14.08
  -6  -1 -17   11.17    7.78
   6  -1  17    7.95   12.95
  -6   1 -17   10.42    6.02
   7   1  17   -2.47   11.63
  -7  -1 -17    1.25    6.09
   7  -1  17    2.90   11.88
  -7   1 -17    2.01    5.59
  -8  -1 -17   -0.54    6.66
  -8   1 -17    2.83    5.99
   8   1  17    3.35   14.24
   8  -1  17    0.65   11.57
  10  -2 -17    5.02   15.54
  10   2 -17   -5.46   16.90
 -10  -2  17   -0.57    3.06
 -10   2  17    3.94    3.11
  -9   2  17    7.24    3.17
   9  -2 -17   -0.66   17.23
   9   2 -17   10.14   15.23
  -9  -2  17    3.03    3.35
   8  -2 -17   17.20   19.07
  -8  -2  17    5.58    3.54
  -8   2  17    5.61    3.21
   8   2 -17    3.28   12.29
  -7  -2  17    5.94    3.47
   7  -2 -17   -7.11   17.68
  -7   2  17   10.88    4.94
   7   2 -17    3.88   10.81
  -6  -2  17   -2.35    2.42
  -6  -2  17   -2.59    2.42
  -6   2  17   -2.55    2.75
   6  -2 -17   17.81   14.58
   6  -2 -17    4.38    3.62
   6   2 -17    2.38    9.31
  -5  -2  17    2.51    3.06
   5  -2 -17   -0.03    3.96
   5   2 -17   -0.58    8.30
  -5   2  17    1.21    2.70
   5  -2 -17   -3.41   11.00
   4  -2 -17   -3.14    9.45
  -4  -2  17    4.91    2.83
   4  -2 -17    6.65    5.15
   4   2 -17    3.19    3.86
  -4  -2  17    0.15   10.37
  -4   2  17    6.68    3.48
  -3  -2  17    5.42    2.87
   3  -2 -17   -6.72    8.06
   3   2 -17    9.58    4.76
  -3   2  17    6.12    3.56
   3  -2 -17    1.70    4.26
  -3  -2  17    1.94   11.96
  -2  -2  17   -0.97   12.00
  -2  -2  17   31.05    5.20
   2  -2 -17   22.20    7.05
   2  -2 -17    0.53    8.04
   2   2 -17   15.28    6.28
  -2   2  17   18.61    5.07
   1  -2 -17   74.06   10.81
   1   2 -17   45.18   10.70
  -1   2  17   58.68    8.05
   0   2 -17    3.54    3.78
   0   2  17   -4.36    2.26
   0  -2  17    2.21   11.56
   0   2  17   -1.60    4.62
   0  -2 -17   -5.24    5.01
   1   2  17    1.62    6.20
   1  -2  17    6.30   11.69
  -1  -2 -17   -0.79    5.25
  -1   2 -17    2.10    3.28
   1   2  17   -1.17    2.46
   2  -2  17    2.94   12.32
  -2   2 -17    6.16    4.50
  -2  -2 -17   10.60    6.90
   2   2  17   13.09    4.42
  -3  -2 -17   -1.08    5.46
   3  -2  17    0.19   10.30
   3   2  17    4.75    2.71
  -3   2 -17    1.01    3.54
   4  -2  17    1.57   12.30
  -4  -2 -17   55.93   10.76
  -4   2 -17   39.83   10.85
   4   2  17   32.40    6.12
  -5   2 -17   12.75    7.09
   5  -2  17   -1.50   13.76
  -5  -2 -17   17.90    8.09
   5   2  17    8.45    3.47
  -6   2 -17    3.84    3.85
   6   2  17    1.86    2.84
   6  -2  17   -1.78   11.34
  -6  -2 -17    3.06    5.90
  -7  -2 -17   17.57    7.42
  -7   2 -17    4.92    6.33
   7   2  17   12.70    4.02
   7  -2  17    0.66   10.87
   9   3 -17   -2.30   12.56
   8   3 -17    1.83   10.56
  -8  -3  17    4.41    3.87
  -8   3  17    3.10    4.12
  -7   3  17    3.28    3.34
   7  -3 -17    5.29    3.27
   7   3 -17    0.74    9.21
  -7  -3  17    2.22    3.41
  -6  -3  17    1.07    3.03
   6   3 -17    2.81    7.87
  -6   3  17    0.81    2.84
   6  -3 -17   11.45    4.57
   5   3 -17   -3.22    8.66
  -5   3  17    0.48    3.35
  -5  -3  17    8.01    3.59
   5  -3 -17    4.46    3.46
  -4  -3  17   47.36    6.91
   4  -3 -17   49.79    9.02
   4   3 -17   60.23   12.34
  -4   3  17   42.49    7.61
   3   3 -17    4.87    4.27
  -3  -3  17   13.81   19.40
  -3   3  17    3.56    3.60
   3  -3 -17    5.02    4.78
   2  -3 -17   41.80    9.05
  -2  -3  17   18.21   27.01
  -2   3  17   34.75    6.98
   2   3 -17   44.21   11.22
   1   3 -17    5.36    4.80
  -1  -3  17   18.13   24.61
   1  -3 -17    7.37    4.96
  -1   3  17    0.81    2.83
   0   3  17    3.50    3.57
   0   3 -17    7.44    5.39
   0  -3  17    7.85   21.27
   0  -3 -17    7.97    5.55
  -1  -3 -17    8.13    5.30
   1   3  17    8.29    3.82
  -1   3 -17    2.41    4.19
   1  -3  17    4.13   20.39
  -2  -3 -17   10.78    5.60
   2   3  17    7.26    3.79
   2  -3  17   15.66   21.15
  -2   3 -17    4.30    5.03
   3   3  17   14.51    5.21
  -3  -3 -17   24.80    7.48
  -3   3 -17    1.23    4.35
   3  -3  17    1.26   18.82
  -4  -3 -17   12.53    5.73
   4   3  17    1.11    2.97
   4  -3  17    5.81   20.34
  -4   3 -17    5.71    5.38
  -5   3 -17   -1.66    4.47
   5  -3  17    1.32   18.53
   5   3  17   -4.15    2.76
  -5  -3 -17   13.42    5.77
   5  -4 -17    5.39    3.54
  -4   4  17   10.58    4.19
   4  -4 -17   19.75    5.99
   3  -4 -17    3.55    3.67
   3   4 -17   -1.39    4.27
  -3  -4  17   -5.38   16.12
  -3   4  17   -1.11    2.88
  -2   4  17    4.65    3.57
  -2  -4  17    3.21   23.02
   2  -4 -17    8.78    3.90
   2   4 -17    4.91    4.80
   1   4 -17   -0.35    3.63
  -1   4  17    4.28    3.70
  -1  -4  17   30.13   31.91
   1  -4 -17    2.18    3.25
   0   4  17   -0.10    3.02
   0   4 -17   -3.12    3.69
   0  -4  17   28.01   30.50
   0  -4 -17    3.86    3.52
   1  -4  17   24.40   27.77
  -1   4 -17    5.48    4.37
  -1  -4 -17    8.55    4.63
   1   4  17    4.07    3.17
  11   0 -18    6.22   17.06
 -11   0  18    1.41    2.84
  10   0 -18   11.78   18.16
 -10   0  18    3.01    2.96
  -9   0  18    1.73    3.03
   9   0 -18    9.20   15.98
   8   0 -18   -2.56   13.02
  -8   0  18   10.75    3.79
   7   0 -18   -9.61   10.80
  -7   0  18    1.92    2.65
  -5   0  18    5.12    2.78
   5   0 -18    0.63    9.02
   5   0 -18    0.60    5.04
   4   0 -18   30.64    7.88
   4   0 -18    0.00   10.36
  -4   0  18   22.19    4.59
  -3   0  18    3.74    6.02
  -3   0  18   -0.66    2.14
   3   0 -18   -0.88    5.45
  -2   0  18  424.12   23.54
   2   0 -18  415.68   26.90
  -1   0  18   -1.63    7.64
   1   0 -18    0.90    5.35
  -1   0  18    4.44    2.74
   0   0 -18    4.44    6.45
   0   0  18    4.60    2.70
   0   0  18   -0.28    7.33
  -1   0 -18   -1.18    5.84
   1   0  18    2.15    7.28
   1   0  18   -1.01    2.17
   2   0  18  261.58   16.18
  -2   0 -18  255.51   21.89
  -3   0 -18   -5.11    4.93
   3   0  18   -1.70   10.10
   4   0  18   -6.33   10.28
  -4   0 -18   -0.21    6.17
   5   0  18  -11.50   12.54
  -5   0 -18   -2.16    5.73
  -6   0 -18   -4.36    5.84
   6   0  18   29.01   16.87
  -7   0 -18  -11.21    6.21
   7   0  18    6.45   13.08
 -11   1  18    6.24    3.07
  11   1 -18   -2.39   16.32
  11  -1 -18   13.65   21.68
 -11  -1  18    3.04    3.22
  10  -1 -18   12.48   22.43
  10   1 -18   -5.86   17.41
 -10  -1  18    6.06    3.78
 -10   1  18   -0.33    2.31
   9  -1 -18   11.44   18.62
  -9  -1  18   15.26    4.63
  -9   1  18    8.80    3.83
   9   1 -18    1.65   14.37
   8   1 -18  -10.49   10.66
  -8  -1  18    5.47    3.36
   8  -1 -18   10.26   16.21
  -8   1  18   -0.08    2.88
   7   1 -18   -2.10    9.84
  -7   1  18    2.93    2.73
   7  -1 -18    9.77   14.08
  -7  -1  18    0.79    2.61
   6  -1 -18   11.70    5.17
  -6  -1  18   14.36    3.98
   6  -1 -18   -0.12    9.99
   6   1 -18    3.65    8.66
  -6   1  18   12.06    3.62
   5  -1 -18    7.14   11.56
   5  -1 -18    7.44    5.31
  -5   1  18   15.01    4.68
   5   1 -18   17.07   12.83
   5   1 -18    7.13    5.39
  -5  -1  18   11.85    3.96
   4  -1 -18   54.83    9.55
   4   1 -18   54.31    9.95
  -4  -1  18   63.17    7.07
  -4   1  18   53.06    8.11
  -3   1  18   34.39    6.34
   3  -1 -18   37.67    8.93
   3   1 -18   31.55    8.24
  -3  -1  18   39.53    6.14
  -2   1  18    2.27    6.56
  -2  -1  18    1.74    2.62
  -2   1  18   -0.92    2.73
   2   1 -18   -0.05    4.84
   2  -1 -18    2.00    5.35
  -2  -1  18    0.43    6.66
   1   1 -18   65.90   11.72
  -1  -1  18   91.97    8.02
   1  -1 -18   90.16   12.55
  -1   1  18   80.05    8.28
   0  -1  18   82.48    7.37
   0   1  18   54.89    7.70
   0   1 -18   63.20   11.66
   0  -1 -18   77.39   11.93
   1  -1  18    2.88    7.48
   1   1  18   -2.13    6.46
   1   1  18    1.59    2.96
  -1  -1 -18    0.57    6.08
  -1   1 -18    6.07    4.90
  -2  -1 -18   -0.09    5.84
  -2   1 -18   -1.25    4.01
   2   1  18   -0.45    2.26
   2  -1  18   -4.69    8.03
   2   1  18    1.52    7.14
  -3   1 -18    5.90    5.46
   3   1  18    4.65    3.13
   3  -1  18  -12.04    6.94
   3   1  18   -2.62    7.07
  -3  -1 -18    5.36    6.53
   4   1  18   14.71    4.27
   4  -1  18   -7.64    9.63
  -4   1 -18    4.42    6.01
   4   1  18    4.50    9.66
  -4  -1 -18    7.69    6.77
  -5   1 -18   20.40    8.22
  -5  -1 -18   38.93   10.26
   5   1  18    1.84   10.03
   5  -1  18   20.19   15.30
   5   1  18   27.24    5.60
   6   1  18  -16.23    9.54
   6  -1  18    8.84   14.05
  -6   1 -18    3.08    5.72
  -6  -1 -18    3.13    6.83
   7   1  18   30.84   15.95
   7  -1  18   10.90   13.21
  -7   1 -18   -2.63    6.21
  -7  -1 -18    3.16    6.17
  10  -2 -18   28.45   23.96
  10   2 -18   15.15   19.99
  -9   2  18    4.97    3.35
  -9  -2  18    4.21    3.45
   9  -2 -18    1.54   16.65
   9   2 -18   -1.24   14.48
  -8   2  18    0.10    2.74
   8   2 -18    5.24   12.14
  -8  -2  18    1.74    2.99
   8  -2 -18   15.12   20.36
   7  -2 -18   -6.32   14.79
  -7   2  18   -0.96    3.20
  -7  -2  18    3.09    2.90
   7   2 -18   -1.16   11.25
   6  -2 -18   40.38    7.81
  -6   2  18   31.61    6.80
   6  -2 -18   -7.24   13.69
   6   2 -18    3.73    9.26
   5  -2 -18    5.03    4.61
  -5  -2  18    1.16    2.73
   5   2 -18    2.29    9.34
   5  -2 -18    5.57   11.66
  -5   2  18   -1.37    2.82
   4  -2 -18   -4.32    9.66
   4  -2 -18    8.88    5.49
  -4  -2  18    8.28    3.59
   4   2 -18    5.34    4.46
  -4  -2  18   -0.60    9.90
  -4   2  18    6.75    3.74
  -3   2  18   61.81    8.53
   3   2 -18   62.37   11.48
   3  -2 -18   74.34   10.92
  -3  -2  18   69.53    7.23
  -2  -2  18   17.01    4.18
   2  -2 -18   -1.61    9.92
   2  -2 -18    9.10    6.24
   2   2 -18   14.94    5.87
  -2   2  18   15.47    4.59
  -2  -2  18    8.33   14.29
  -1  -2  18   -7.98   11.40
   1  -2 -18    8.60    6.21
  -1   2  18    0.06    2.70
  -1   2  18    0.03    4.57
   1   2 -18    1.67    4.15
   0   2  18    4.40    3.26
   0   2  18   -2.12    4.47
   0  -2 -18   -1.34    5.45
   0  -2  18   -5.16    8.51
   0   2 -18    6.39    5.44
   1   2  18   21.32    5.73
   1  -2  18   -0.10   10.64
  -1   2 -18   12.41    6.83
  -1  -2 -18   29.45    8.94
   2  -2  18   -1.41    9.84
  -2   2 -18   10.16    6.28
  -2  -2 -18    5.82    7.16
   2   2  18    7.82    4.06
   3  -2  18    3.66   12.70
  -3  -2 -18    1.85    5.99
   3   2  18    0.52    3.14
  -3   2 -18    5.03    4.96
  -4  -2 -18    0.79    5.69
  -4   2 -18    2.79    4.10
   4  -2  18    8.79   13.39
   4   2  18    8.05    3.14
  -5  -2 -18   -3.31    5.22
   5   2  18   -3.03    2.69
  -5   2 -18   -1.03    4.39
   5  -2  18    8.73   11.76
   6   2  18    5.93    3.07
  -6   2 -18   -4.22    4.28
   6  -2  18    2.52   13.63
  -6  -2 -18    4.27    6.42
   8   3 -18    4.26   11.48
  -7  -3  18    7.14    3.88
   7   3 -18   -1.75   10.43
  -7   3  18    7.35    4.55
  -6  -3  18    3.38    3.55
  -6   3  18    0.79    2.79
   6   3 -18    4.29    9.69
   6  -3 -18    3.64    3.06
   5  -3 -18    6.96    3.85
   5   3 -18    6.10    9.72
  -5   3  18   -1.27    2.92
  -5  -3  18   -2.25    2.95
   4  -3 -18    2.42    4.15
  -4  -3  18    9.31   15.93
  -4   3  18   -0.94    2.83
   3   3 -18    2.41    4.35
   3  -3 -18   13.71    5.98
  -3  -3  18    1.12   16.94
  -3   3  18    1.78    2.96
  -2   3  18    0.78    2.71
   2   3 -18   10.03    5.00
  -2  -3  18   20.32   25.29
   2  -3 -18    5.98    4.61
  -1   3  18   -1.33    2.96
   1  -3 -18    4.85    5.14
  -1  -3  18  -11.88   23.63
   1   3 -18    5.49    4.47
   0  -3  18    1.15   17.51
   0  -3 -18    4.97    5.09
   0   3  18   -0.50    3.43
   0   3 -18    4.99    4.10
   1   3  18   12.71    5.11
  -1   3 -18   20.02    7.48
  -1  -3 -18   30.94    8.08
   1  -3  18   13.79   19.54
   2   3  18    5.50    3.61
   2  -3  18    1.01   20.05
  -2  -3 -18    7.34    5.26
  -2   3 -18    4.05    4.40
  -3   3 -18    5.61    4.81
   3  -3  18   14.93   22.04
   3   3  18   -0.79    3.06
  -3  -3 -18    7.79    4.87
   4   3  18    1.25    2.93
  -4  -3 -18   12.14    5.40
  -4   3 -18    4.45    4.50
   4  -3  18   18.24   19.43
  -3  -4  18    9.78   16.46
  -2  -4  18   -1.03   22.04
  -1  -4  18    3.06   30.60
   0  -4  18   13.13   27.91
  10   0 -19   11.60   19.49
 -10   0  19    1.63    2.62
   9   0 -19    6.34   17.97
  -9   0  19    3.48    3.46
   8   0 -19   -5.35   13.32
  -8   0  19   -1.40    2.40
  -7   0  19    1.74    2.66
   7   0 -19    0.40   12.33
   6   0 -19    1.80    9.25
  -6   0  19    5.36    2.84
   5   0 -19   -3.33    7.61
   5   0 -19    2.04    5.57
  -5   0  19    5.95    2.91
  -4   0  19   -0.92    2.18
   4   0 -19    6.89    5.40
   4   0 -19    3.76   12.44
  -3   0  19    0.67    2.10
   3   0 -19    1.15    5.59
  -3   0  19   -0.04    5.69
   2   0 -19   -8.66    4.51
  -2   0  19   -0.85    5.85
  -2   0  19    2.70    2.49
  -1   0  19    6.55    3.26
   1   0 -19    1.48    6.23
  -1   0  19   -0.94    7.49
   0   0  19    1.52    2.31
   0   0 -19   -5.13    5.25
   0   0  19    0.97    7.66
   1   0  19   48.72    6.97
  -1   0 -19   69.82   12.72
   2   0  19    2.97    2.32
   2   0  19   -6.53    9.37
  -2   0 -19   -0.47    6.75
   3   0  19   -5.88   10.36
  -3   0 -19   26.01    9.32
   4   0  19    0.63   13.43
  -4   0 -19  -11.03    4.90
  -5   0 -19    9.78    7.96
   5   0  19  -14.12   11.50
  -6   0 -19   -4.64    6.12
   6   0  19    3.30   14.75
  10  -1 -19   -2.91   17.93
  10   1 -19    8.86   16.94
 -10   1  19    6.86    3.87
 -10  -1  19    5.14    3.82
   9  -1 -19    1.08   19.39
  -9   1  19    8.43    3.75
  -9  -1  19   18.63    4.87
   9   1 -19   -8.20   12.52
   8  -1 -19   -3.25   13.47
  -8   1  19    3.92    3.30
  -8  -1  19    4.66    3.01
   8   1 -19   -2.56   10.40
  -7   1  19   -0.29    2.80
   7   1 -19   -3.69    8.11
  -7  -1  19    8.83    3.73
   7  -1 -19    0.64   13.91
   6   1 -19    4.16    8.71
   6  -1 -19   -4.62   10.32
  -6  -1  19   25.17    5.35
  -6   1  19   23.51    4.69
  -5  -1  19   31.69    5.90
  -5   1  19   50.33    8.18
   5  -1 -19   39.44    8.53
   4   1 -19    0.47    5.26
   4  -1 -19    8.19    6.07
  -4   1  19   14.24    4.36
  -4  -1  19    0.41    8.22
  -4  -1  19   18.00    4.35
   4  -1 -19    0.10    8.39
  -3   1  19    0.52    2.85
   3  -1 -19    9.04    6.35
   3   1 -19   -1.59    5.26
  -3  -1  19    0.97    6.19
  -3  -1  19   -2.52    2.29
   3  -1 -19   -6.18   10.82
  -2  -1  19   -4.06    5.17
   2  -1 -19    7.93    6.59
  -2  -1  19    7.81    3.08
  -2   1  19    7.23    3.27
  -2   1  19   -0.01    6.01
   2   1 -19   -2.53    4.97
  -1   1  19    3.86    7.06
   1  -1 -19   11.70    6.98
  -1  -1  19   18.00    4.45
   1   1 -19    3.26    5.41
  -1  -1  19   -0.19    6.75
  -1   1  19    9.80    4.47
   0   1  19   36.75    6.46
   0  -1  19   23.90    4.85
   0   1 -19   19.12    7.88
   0  -1 -19   35.36    9.64
   1  -1  19    0.29    6.50
  -1  -1 -19   -5.52    4.57
   1   1  19    3.23    2.52
   1   1  19   -2.76    7.73
  -1   1 -19   -1.45    4.92
  -2  -1 -19    4.73    7.00
  -2   1 -19    2.63    5.90
   2   1  19   -5.14    6.39
   2   1  19    2.71    2.87
  -3  -1 -19   10.30    6.95
   3   1  19    2.22    2.56
   3   1  19   -2.33    7.70
  -3   1 -19   -2.64    4.43
  -4   1 -19    2.27    4.87
   4   1  19    0.66    2.67
   4   1  19    4.74   10.38
  -4  -1 -19    0.83    6.25
   4  -1  19   -6.36    9.72
   5  -1  19  -17.23    9.39
  -5  -1 -19    3.14    6.69
   5   1  19   -8.66    9.37
  -5   1 -19    0.04    6.14
   6  -1  19   20.99   12.93
  -6  -1 -19    6.31    5.99
  -6   1 -19   -2.11    5.44
   6   1  19   -5.99    9.34
   9   2 -19   -6.89   11.21
   9  -2 -19  -12.32   14.74
  -9  -2  19   -1.13    3.04
  -9   2  19    0.48    2.38
  -8   2  19   11.15    3.99
   8   2 -19   10.94   13.22
   8  -2 -19  -10.82   18.25
  -8  -2  19    8.37    4.02
   7  -2 -19    2.69   17.96
   7   2 -19   -8.01   10.76
  -7   2  19   20.11    5.20
   6  -2 -19   -3.30   12.35
   6   2 -19    5.80   10.63
   6  -2 -19    3.83    3.36
  -6  -2  19    2.50    3.02
  -6   2  19   -5.17    2.71
  -5   2  19    4.63    3.60
   5  -2 -19   -7.42    9.51
  -5  -2  19    1.71    3.05
   5  -2 -19    8.28    4.95
   5   2 -19   10.37   12.70
  -4   2  19   12.24    4.65
  -4  -2  19   -1.47   10.55
   4  -2 -19   12.59    6.12
   4  -2 -19   -7.87    9.05
   4   2 -19   10.40    5.78
  -4  -2  19   20.41    4.88
  -3  -2  19    7.35   11.69
  -3   2  19   33.98    6.55
  -3  -2  19   46.16    6.67
   3  -2 -19   41.00    8.94
   3   2 -19   33.73    9.10
   2  -2 -19   10.14    6.39
  -2  -2  19    4.81   12.54
   2  -2 -19   -3.00   10.06
  -2   2  19   19.62    5.71
   2   2 -19   17.22    6.23
  -1   2  19    1.05    2.87
   1  -2 -19    6.19    6.29
  -1   2  19    1.15    5.25
   1   2 -19    7.01    5.01
  -1  -2  19    0.11   12.40
   0   2 -19    5.81    5.05
   0   2  19   -0.79    2.67
   0  -2 -19   -0.64    5.30
   0  -2  19    0.70    9.72
  -1   2 -19    2.24    4.37
  -1  -2 -19    6.09    6.70
   1   2  19    3.83    3.29
   1  -2  19   -0.36   10.05
   2   2  19    0.26    3.04
  -2  -2 -19    2.61    5.75
  -2   2 -19    7.65    5.81
   2  -2  19   -2.99   10.51
   3  -2  19    7.41   13.99
   3   2  19    5.03    3.86
  -3  -2 -19    5.55    6.32
  -3   2 -19    4.92    5.91
  -4  -2 -19    3.75    6.01
  -4   2 -19   -0.43    3.90
   4  -2  19   -2.29   10.50
   4   2  19    1.47    3.38
  -5   2 -19    0.45    4.65
   5  -2  19    4.13   13.03
  -5  -2 -19    2.42    6.06
   5   2  19    2.62    3.16
  -6   3  19   30.61    6.93
   6  -3 -19   44.55    8.15
  -5   3  19    1.94    3.02
   5   3 -19    2.06   12.02
   5  -3 -19    7.02    3.70
  -5  -3  19   -0.29    2.91
  -4  -3  19  -12.68   12.46
   4  -3 -19    8.67    4.03
  -4   3  19   -0.43    3.00
  -3   3  19    6.09    3.50
   3  -3 -19    8.36    4.64
  -3  -3  19    0.62   15.41
   3   3 -19   10.34    5.21
  -2  -3  19   -3.40   19.98
   2  -3 -19   21.41    6.69
  -2   3  19    1.69    3.18
   2   3 -19   -4.91    3.86
   1   3 -19    1.43    4.16
   1  -3 -19    5.10    4.43
  -1   3  19   -3.24    2.78
  -1  -3  19   33.96   25.82
   0   3  19   20.69    5.33
   0  -3  19    6.84   19.98
   0   3 -19    7.35    5.86
   0  -3 -19   12.81    6.50
   1  -3  19   -1.98   17.40
  -1  -3 -19    1.83    4.41
   1   3  19   -1.02    3.49
  -1   3 -19    4.41    4.61
  -2  -3 -19   12.83    5.65
   2   3  19    2.76    4.21
  -2   3 -19    4.94    4.80
   2  -3  19   16.62   21.78
  -3   3 -19   -4.04    3.74
  -3  -3 -19    1.99    3.98
   3  -3  19   20.77   21.95
  -9   0  20   -0.22    2.83
   9   0 -20    2.96   18.82
   8   0 -20   -1.38   13.31
  -8   0  20    3.12    3.33
  -7   0  20    2.13    2.81
   7   0 -20   -7.52   10.24
  -6   0  20   13.48    3.34
   6   0 -20   -1.90   10.22
   5   0 -20    1.20    5.23
   5   0 -20   -7.71    8.49
  -5   0  20   -0.24    2.45
  -4   0  20    4.39    2.75
   4   0 -20    4.72   13.16
   4   0 -20    9.93    6.68
  -3   0  20   -4.16    5.32
   3   0 -20   -1.90    5.56
  -3   0  20   -0.21    2.06
  -2   0  20    7.01    9.07
   2   0 -20   16.47    7.91
  -2   0  20   14.91    4.68
  -1   0  20   -5.26    8.15
  -1   0  20   -0.29    2.43
   1   0 -20   -3.54    5.43
   0   0  20   -3.49    8.77
   0   0 -20   10.79    7.87
   0   0  20   17.82    4.97
   1   0  20    4.20    8.98
   1   0  20   -0.86    1.72
  -1   0 -20   -4.64    5.01
   2   0  20   -5.12    9.44
  -2   0 -20   -4.91    5.79
  -3   0 -20   -1.67    6.50
   3   0  20   -7.65   10.63
  -4   0 -20    3.35    6.50
   4   0  20    5.40   13.18
   5   0  20    2.97   13.64
  -5   0 -20   -3.14    7.02
  -9  -1  20   14.74    4.21
  -9   1  20    5.79    3.12
   9   1 -20   -1.42   13.61
   9  -1 -20   18.59   23.10
   8   1 -20   -1.17   12.08
  -8   1  20   -1.62    2.92
  -8  -1  20    1.45    2.55
   8  -1 -20    1.67   13.64
  -7  -1  20    1.51    2.37
   7  -1 -20   -4.46   13.39
  -7   1  20   -2.07    2.59
   7   1 -20   -2.93   10.53
   6   1 -20   -0.88    8.00
  -6   1  20    3.70    2.61
   6  -1 -20   -0.49   11.12
  -6  -1  20    1.12    2.76
   5   1 -20   -7.10   11.24
  -5   1  20   -2.82    2.49
   5  -1 -20   -3.24    4.51
   5  -1 -20   -5.00   10.49
  -5  -1  20   -0.34    2.64
   4  -1 -20   -4.62    7.12
   4  -1 -20    4.82    5.55
   4   1 -20    2.07    6.32
  -4   1  20    2.05    3.03
  -4  -1  20   -0.06    2.64
  -4  -1  20   -0.95    6.22
  -3  -1  20    7.09    3.26
  -3  -1  20    0.71    6.92
   3  -1 -20    8.01    6.84
   3  -1 -20   -0.70   11.99
  -3   1  20    6.08    3.90
   3   1 -20    8.03    6.70
   2   1 -20    4.61    6.57
  -2   1  20    7.45    7.64
  -2  -1  20    5.38    7.56
  -2  -1  20   15.91    4.40
  -2   1  20    8.27    3.66
   2  -1 -20    5.54    6.83
  -1  -1  20   -1.95    6.18
  -1   1  20   10.09    3.96
   1  -1 -20    7.42    7.27
   1   1 -20    2.40    5.85
  -1   1  20    1.00    5.88
  -1  -1  20   13.79    4.09
   0   1  20   -0.57    7.15
   0  -1 -20    6.83    6.75
   0   1  20   13.11    4.24
   0  -1  20    2.97    8.10
   0   1 -20    3.69    6.16
   1  -1  20    2.25    7.61
  -1   1 -20    0.22    5.80
   1   1  20    0.64    2.61
  -1  -1 -20    2.84    6.72
   1   1  20    0.26    7.98
   2   1  20    6.78    3.36
   2   1  20   -0.31    6.87
  -2  -1 -20    8.86    7.51
  -2   1 -20    1.64    6.37
   2  -1  20   -4.58    6.53
  -3   1 -20   -6.43    3.84
   3   1  20   -2.37    2.18
   3   1  20   -1.28    7.14
   3  -1  20    5.71   10.64
  -3  -1 -20    4.98    6.84
  -4  -1 -20    0.92    6.05
  -4   1 -20   -1.30    5.65
   4   1  20    1.77    8.76
   4  -1  20  -10.38    9.03
   4   1  20    0.21    2.43
   5   1  20    3.37   10.21
   5  -1  20   -9.85    9.00
  -5  -1 -20    3.93    6.73
  -5   1 -20   -3.77    5.31
   8   2 -20   -0.85   11.43
  -8  -2  20    1.01    3.37
   8  -2 -20   16.67   18.96
   7   2 -20    2.32   10.84
  -7   2  20   23.49    6.14
   7  -2 -20   -6.97   18.15
  -6  -2  20    3.50    3.53
   6   2 -20   -1.43    8.59
  -6   2  20    1.02    3.46
   6  -2 -20   -2.29   12.31
   6  -2 -20    6.71    4.14
  -5   2  20    0.47    3.75
   5  -2 -20    1.00   12.36
   5   2 -20    8.52   12.04
  -5  -2  20    1.76    3.03
   5  -2 -20    8.13    4.49
   4  -2 -20   24.75    7.49
  -4  -2  20   25.88    5.45
   4  -2 -20   -3.37   10.58
  -4  -2  20   10.45   13.23
  -4   2  20   25.36    5.86
   3  -2 -20    4.27   10.48
  -3  -2  20   -5.42   10.44
   3   2 -20    3.81    4.86
  -3  -2  20    4.84    3.10
  -3   2  20    6.42    3.74
   3  -2 -20    5.08    4.78
   2   2 -20   21.18    7.50
  -2  -2  20    9.56   12.35
   2  -2 -20   37.90    8.92
  -2   2  20   21.01    5.52
  -1   2  20   -1.13    2.72
   1   2 -20   -3.36    4.05
   1  -2 -20    4.04    5.71
  -1  -2  20    8.55   12.03
   0   2  20   -2.15    2.74
   0  -2 -20   -3.62    4.98
   0  -2  20    3.88   11.26
   0   2 -20   -0.51    4.29
  -1   2 -20   -0.86    3.88
   1  -2  20    0.69   10.13
   1   2  20   -0.86    2.55
  -1  -2 -20   -1.39    4.55
   2  -2  20    3.94   12.18
  -2  -2 -20   -3.10    5.66
  -2   2 -20    1.25    3.76
   2   2  20    6.48    3.45
  -3  -2 -20    3.85    5.78
  -3   2 -20   -3.80    3.50
   3  -2  20   -3.48   13.69
   3   2  20   -4.33    2.54
  -4  -2 -20   -1.86    5.62
  -4   2 -20   -0.52    4.34
   4  -2  20   -3.58   12.16
  -4  -3  20    0.88   14.55
   4  -3 -20   10.69    4.55
  -3  -3  20   -8.26   15.59
  -3   3  20   -3.28    2.77
   3   3 -20    0.96    4.21
   3  -3 -20    6.62    4.30
  -2   3  20   -8.32    2.57
  -2  -3  20   -7.39   18.45
   2  -3 -20    6.63    4.31
   2   3 -20   -0.82    4.08
   1   3 -20    8.75    4.32
  -1  -3  20    2.12   23.07
   1  -3 -20    8.04    5.09
  -1   3  20   -1.45    3.26
   0  -3 -20    6.56    4.54
   0  -3  20   10.74   21.69
   0   3 -20    0.72    4.19
   1  -3  20   15.90   19.66
   8   0 -21   10.69   15.33
  -8   0  21   -0.06    2.56
  -7   0  21    5.07    2.99
   7   0 -21   -7.65   10.68
   6   0 -21    1.39   13.92
  -6   0  21   -0.04    2.78
   5   0 -21   -3.01   10.26
  -5   0  21    2.90    2.67
  -4   0  21    3.56    2.53
   4   0 -21    0.58    6.24
   4   0 -21   -5.40   11.32
   3   0 -21    0.13    5.96
  -3   0  21    0.24    2.60
  -3   0  21   -0.04    7.32
   2   0 -21    0.24    5.70
  -2   0  21   -2.55    9.00
  -2   0  21    0.66    2.32
  -1   0  21   10.60    4.07
   1   0 -21    3.08    6.49
  -1   0  21   -4.69    8.04
   0   0  21   -2.93    8.70
   0   0  21    4.40    3.03
   0   0 -21  -10.16    5.06
  -1   0 -21   19.79    9.09
   1   0  21   14.35   10.97
   1   0  21   12.16    4.17
  -2   0 -21   -3.12    5.78
   2   0  21   -2.85    8.95
  -3   0 -21   -2.12    5.69
   3   0  21   -4.30   11.05
  -4   0 -21   -5.79    4.60
   4   0  21    1.44   13.49
   8  -1 -21    2.39   16.72
   8   1 -21   -6.02   11.13
  -8   1  21    1.64    3.21
  -8  -1  21    5.90    3.46
  -7   1  21    0.21    2.76
   7  -1 -21    4.13   13.54
   7   1 -21   -2.53    9.56
  -7  -1  21    0.25    2.67
   6   1 -21    1.41   10.13
  -6  -1  21   17.63    4.36
   6  -1 -21   -5.30    9.23
   5  -1 -21   -2.74   10.49
  -5  -1  21    3.06    2.78
   5   1 -21   -2.42   10.39
  -5   1  21   -0.70    2.27
   5  -1 -21    5.70    4.76
   4   1 -21   18.42    7.92
  -4   1  21   27.65    6.23
  -4  -1  21   25.67    5.43
  -4  -1  21    4.65    8.18
   4  -1 -21   39.66    9.24
   4  -1 -21   -2.44   10.33
   3   1 -21   14.40    7.17
  -3   1  21   23.60    5.92
   3  -1 -21   32.08    9.60
  -3  -1  21   24.66    5.38
   3  -1 -21    0.83    9.58
  -2   1  21    2.67    7.38
   2   1 -21   -4.28    5.56
  -2  -1  21    4.00    8.77
  -2   1  21   -0.82    2.45
   2  -1 -21    0.25    5.54
  -2  -1  21   -0.91    2.50
  -1  -1  21    2.74    7.25
   1   1 -21   11.49    7.55
  -1   1  21    3.33    6.50
   1  -1 -21   10.86    7.19
  -1  -1  21    5.78    3.31
  -1   1  21    6.12    3.23
   0  -1  21   -5.04    6.98
   0   1  21    5.31    8.28
   0   1  21    2.29    3.23
   0   1 -21   -6.82    5.06
   0  -1 -21    3.15    7.25
   1  -1  21    1.43    8.40
  -1   1 -21   -3.54    5.33
   1   1  21   -3.52    2.23
   1   1  21   -3.88    7.98
  -1  -1 -21   -5.02    5.86
  -2  -1 -21    1.91    6.44
   2   1  21   -0.44    2.58
  -2   1 -21    5.27    6.72
   2   1  21   -2.27    7.82
   2  -1  21   -2.24    8.41
   3   1  21    5.24    3.03
   3   1  21    3.39    8.84
  -3  -1 -21   -1.83    6.22
   3  -1  21   -3.91    8.40
  -3   1 -21   -0.42    5.44
  -4  -1 -21   16.24    8.67
   4  -1  21    3.04   11.98
   4   1  21    5.48   10.72
  -4   1 -21   12.21    8.00
  -6   2  21   -5.21    2.67
   6  -2 -21  -13.81   12.12
  -6  -2  21   -0.11    3.02
   6   2 -21    5.60    9.37
  -5   2  21    9.91    4.08
  -5  -2  21    6.80    3.67
   5  -2 -21    4.40   12.75
   5   2 -21    3.11   11.34
   5  -2 -21   10.78    4.84
  -4  -2  21    2.96   13.21
   4  -2 -21    3.89    4.82
  -4   2  21    4.69    3.20
  -4  -2  21   10.21    3.58
   4  -2 -21  -16.36   10.50
   3  -2 -21    0.61    4.42
  -3  -2  21   -7.43   10.15
   3   2 -21    0.85    4.71
  -3   2  21    0.47    3.55
  -2   2  21    4.48    3.16
   2   2 -21    2.11    4.96
  -2  -2  21    7.85   13.97
   2  -2 -21    4.18    5.45
  -1  -2  21   -2.31   13.97
  -1   2  21   -1.52    2.96
   1   2 -21    0.73    4.45
   1  -2 -21    5.97    5.81
   0   2  21    3.04    3.08
   0   2 -21    2.47    5.52
   0  -2  21    4.14   11.88
   0  -2 -21   -4.49    4.67
  -1   2 -21   -0.22    5.04
   1  -2  21    2.57    9.55
  -1  -2 -21   -1.14    5.33
   1   2  21   -3.05    2.52
   2  -2  21   -3.92    9.99
  -2   2 -21    7.79    5.57
  -2  -2 -21   -0.37    5.58
   7   0 -22    3.00   14.00
  -7   0  22    0.12    2.79
   6   0 -22   -1.61   10.95
  -6   0  22    3.55    2.95
  -5   0  22    0.60    2.57
   5   0 -22    3.79   12.66
   4   0 -22   -0.85   12.93
  -4   0  22    3.06    2.49
   4   0 -22   18.20    8.27
  -3   0  22    1.16    2.28
  -3   0  22   -0.32    8.45
   3   0 -22   -1.74    5.44
   2   0 -22    1.07    6.53
  -2   0  22   -1.16    7.14
  -2   0  22    0.93    2.53
   1   0 -22   -3.15    6.21
  -1   0  22   -0.25    2.25
  -1   0  22    8.19    9.57
   0   0 -22    8.87    7.99
   0   0  22    3.34   10.14
   0   0  22   17.34    4.84
   1   0  22   -4.04    9.50
  -1   0 -22   -5.21    5.22
   2   0  22   -3.12    9.47
  -2   0 -22   -5.29    6.07
   3   0  22   -8.55   10.46
  -6   1  22   -0.19    2.46
   6   1 -22   -5.43   10.14
   6  -1 -22   -7.06   11.32
  -6  -1  22    3.76    3.18
  -5  -1  22    5.09    3.29
   5  -1 -22   -1.60   12.00
  -5   1  22    0.62    2.49
   5   1 -22   -2.75   10.11
   5  -1 -22   23.48    6.74
  -4  -1  22    1.75    7.49
   4  -1 -22    2.15    5.73
   4  -1 -22   -2.66    9.42
  -4   1  22    1.96    2.79
  -4  -1  22    1.82    2.54
   4   1 -22   -5.19    5.46
   3   1 -22   -9.99    5.76
  -3  -1  22   -1.98    2.11
  -3  -1  22    6.88    7.04
   3  -1 -22   -3.11    5.29
   3  -1 -22   -1.28   11.59
  -3   1  22    5.65    3.69
  -2  -1  22   -2.16    6.64
   2   1 -22    3.87    6.63
   2  -1 -22   -3.91    5.57
  -2   1  22   -2.73    6.97
  -2  -1  22    2.50    2.93
  -2   1  22    2.42    3.01
  -1   1  22   -2.00    2.12
   1  -1 -22    3.04    6.56
  -1  -1  22   -2.45    7.80
   1   1 -22   -3.95    5.06
  -1   1  22   -6.32    6.16
   0   1  22   -2.31    6.61
   0  -1 -22    5.65    7.32
   0   1 -22    4.79    7.27
   0  -1  22    5.93   10.41
   0   1  22   -0.36    2.50
  -1   1 -22   -5.32    5.34
   1  -1  22    0.44    7.17
   1   1  22    4.46   10.03
  -1  -1 -22    5.23    7.35
   1   1  22    2.64    2.87
   2  -1  22    1.37    8.91
  -2  -1 -22    5.38    7.50
  -2   1 -22   11.19    8.60
   2   1  22    1.75   10.38
  -4  -2  22   -2.27   11.06
   3   2 -22   -4.35    5.08
  -3  -2  22    5.88   11.13
   3  -2 -22   -1.92    3.84
   2   2 -22  -10.74    4.02
   2  -2 -22    5.79    5.50
  -2  -2  22   -3.36   10.32
   1  -2 -22    3.40    5.18
  -1  -2  22    8.37   13.21
   0  -2  22    1.54   11.64
   4   0 -23  -13.60    4.67
   4   0 -23   -3.06   12.01
  -4   0  23    3.96    2.74
  -3   0  23   12.11    3.85
  -3   0  23    4.18    9.46
   3   0 -23   15.73    8.49
   2   0 -23   -0.77    5.82
  -2   0  23    5.58    8.68
  -2   0  23    4.97    2.44
   1   0 -23   -0.85    5.88
  -1   0  23    5.39   10.64
   0   0 -23   -8.10    5.56
   0   0  23    4.29   12.17
   1   0  23    0.79   11.38
  -3  -1  23   -0.83    6.02
   2  -1 -23    0.33    6.48
  -2   1  23    4.97    7.52
  -2  -1  23    4.39    8.02
  -1  -1  23   -5.85    7.27
  -1   1  23    2.69    6.23
   0  -1  23   -9.02    7.28
   0   1  23    5.47    7.68
   0   0   0    0.00    0.00
;
_shelx_hkl_checksum    4793

#==================================================================================================END

 
data_heotx

# start Validation Reply Form
_vrf_PLAT353_heotx
;
RESPONSE: Strong hydrogen bonding interactions are involved.
;
# end Validation Reply Form
 
_audit_creation_method            'SHELXL-2014/7'
_shelx_SHELXL_version_number      '2014/7'
_chemical_name_systematic         ?
_chemical_name_common             ?
_chemical_melting_point           ?
_chemical_formula_moiety          'C32 H38 N4'
_chemical_formula_sum             'C32 H38 N4' 
_chemical_formula_weight          478.66

loop_
 _atom_type_symbol
 _atom_type_description
 _atom_type_scat_dispersion_real
 _atom_type_scat_dispersion_imag
 _atom_type_scat_source
 'C'  'C'   0.0033   0.0016
 'International Tables Vol C Tables 4.2.6.8 and 6.1.1.4'
 'H'  'H'   0.0000   0.0000
 'International Tables Vol C Tables 4.2.6.8 and 6.1.1.4'
 'N'  'N'   0.0061   0.0033
 'International Tables Vol C Tables 4.2.6.8 and 6.1.1.4'
 
_space_group_crystal_system       monoclinic
_space_group_IT_number            14
_space_group_name_H-M_alt         'P 21/c'
_space_group_name_Hall            '-P 2ybc'
 
_shelx_space_group_comment
;
The symmetry employed for this shelxl refinement is uniquely defined
by the following loop, which should always be used as a source of
symmetry information in preference to the above space-group names.
They are only intended as comments.
;
 
loop_
 _space_group_symop_operation_xyz
 'x, y, z'
 '-x, y+1/2, -z+1/2'
 '-x, -y, -z'
 'x, -y-1/2, z-1/2'
 
_cell_length_a                    9.517(3)
_cell_length_b                    18.851(7)
_cell_length_c                    7.525(3)
_cell_angle_alpha                 90
_cell_angle_beta                  104.876(7)
_cell_angle_gamma                 90
_cell_volume                      1304.8(8)
_cell_formula_units_Z             2
_cell_measurement_temperature     298(2)
_cell_measurement_reflns_used     1234
_cell_measurement_theta_min       2.21
_cell_measurement_theta_max       19.97
 
_exptl_crystal_description        'plate'
_exptl_crystal_colour             'blue'
_exptl_crystal_density_meas       ?
_exptl_crystal_density_method     ?
_exptl_crystal_density_diffrn     1.218          
_exptl_crystal_F_000              516
_exptl_transmission_factor_min    ?
_exptl_transmission_factor_max    ?
_exptl_crystal_size_max           0.28
_exptl_crystal_size_mid           0.24
_exptl_crystal_size_min           0.12
_exptl_absorpt_coefficient_mu     0.072
_shelx_estimated_absorpt_T_min    ?
_shelx_estimated_absorpt_T_max    ?
_exptl_absorpt_correction_type    multi-scan
_exptl_absorpt_correction_T_min   0.980
_exptl_absorpt_correction_T_max   0.991
_exptl_absorpt_process_details    'SADABS 2014/5'
_exptl_absorpt_special_details    ?
_diffrn_ambient_temperature       298(2)
_diffrn_radiation_wavelength      0.71073
_diffrn_radiation_type            MoK\a
_diffrn_source                    'sealed tube'
_diffrn_measurement_device_type   'Bruker APEX-II CCD'
_diffrn_measurement_method        '\f and \w scans'
_diffrn_detector_area_resol_mean  ?
_diffrn_reflns_number             13269
_diffrn_reflns_av_unetI/netI      0.0516
_diffrn_reflns_av_R_equivalents   0.0581
_diffrn_reflns_limit_h_min        -11
_diffrn_reflns_limit_h_max        11
_diffrn_reflns_limit_k_min        -23
_diffrn_reflns_limit_k_max        23
_diffrn_reflns_limit_l_min        -9
_diffrn_reflns_limit_l_max        9
_diffrn_reflns_theta_min          2.161
_diffrn_reflns_theta_max          26.117
_diffrn_reflns_theta_full         25.242
_diffrn_measured_fraction_theta_max   0.990
_diffrn_measured_fraction_theta_full  0.999
_diffrn_reflns_Laue_measured_fraction_max    0.990
_diffrn_reflns_Laue_measured_fraction_full   0.999
_diffrn_reflns_point_group_measured_fraction_max   0.990
_diffrn_reflns_point_group_measured_fraction_full  0.999
_reflns_number_total              2564
_reflns_number_gt                 1587
_reflns_threshold_expression      'I > 2\s(I)'
_reflns_Friedel_coverage          0.000
_reflns_Friedel_fraction_max      .
_reflns_Friedel_fraction_full     .
 
_reflns_special_details
;
 Reflections were merged by SHELXL according to the crystal
 class for the calculation of statistics and refinement.
 
 _reflns_Friedel_fraction is defined as the number of unique
 Friedel pairs measured divided by the number that would be
 possible theoretically, ignoring centric projections and
 systematic absences.
;
 
_computing_data_collection        'Bruker SMART'
_computing_cell_refinement        'Bruker SMART'
_computing_data_reduction         'Bruker SMART'
_computing_structure_solution     'Bruker SHELXTL'
_computing_structure_refinement   'SHELXL-2014/7 (Sheldrick, 2014)'
_computing_molecular_graphics     'Bruker SHELXTL'
_computing_publication_material   'Bruker SHELXTL'
_refine_special_details           ?
_refine_ls_structure_factor_coef  Fsqd
_refine_ls_matrix_type            full
_refine_ls_weighting_scheme       calc
_refine_ls_weighting_details
'w=1/[\s^2^(Fo^2^)+(0.0737P)^2^+0.0805P] where P=(Fo^2^+2Fc^2^)/3'
_atom_sites_solution_primary      ?
_atom_sites_solution_secondary    ?
_atom_sites_solution_hydrogens    mixed
_refine_ls_hydrogen_treatment     mixed
_refine_ls_extinction_method      none
_refine_ls_extinction_coef        .
_refine_ls_number_reflns          2564
_refine_ls_number_parameters      170
_refine_ls_number_restraints      0
_refine_ls_R_factor_all           0.1003
_refine_ls_R_factor_gt            0.0559
_refine_ls_wR_factor_ref          0.1509
_refine_ls_wR_factor_gt           0.1276
_refine_ls_goodness_of_fit_ref    1.013
_refine_ls_restrained_S_all       1.013
_refine_ls_shift/su_max           0.001
_refine_ls_shift/su_mean          0.000
 
loop_
 _atom_site_label
 _atom_site_type_symbol
 _atom_site_fract_x
 _atom_site_fract_y
 _atom_site_fract_z
 _atom_site_U_iso_or_equiv
 _atom_site_adp_type
 _atom_site_occupancy
 _atom_site_site_symmetry_order  
 _atom_site_calc_flag
 _atom_site_refinement_flags_posn
 _atom_site_refinement_flags_adp
 _atom_site_refinement_flags_occupancy
 _atom_site_disorder_assembly
 _atom_site_disorder_group
N1 N 0.85202(18) 1.06782(9) 0.5132(2) 0.0497(5) Uani 1 1 d . . . . .
N2 N 0.96753(18) 0.94501(9) 0.7042(2) 0.0499(5) Uani 1 1 d . . . . .
C4 C 0.8006(2) 1.04379(11) 0.6561(3) 0.0475(5) Uani 1 1 d . . . . .
C8 C 1.0052(2) 0.88812(11) 0.8205(3) 0.0498(6) Uani 1 1 d . . . . .
C9 C 1.1097(2) 0.83716(12) 0.8122(3) 0.0554(6) Uani 1 1 d . . . . .
H9 H 1.1183 0.8010 0.8984 0.066 Uiso 1 1 calc R U . . .
C1 C 0.7747(2) 1.12756(11) 0.4454(3) 0.0501(6) Uani 1 1 d . . . . .
C6 C 0.8317(2) 0.94845(11) 0.9095(3) 0.0523(6) Uani 1 1 d . . . . .
H6 H 0.7641 0.9636 0.9713 0.063 Uiso 1 1 calc R U . . .
C3 C 0.6843(2) 1.08949(11) 0.6803(3) 0.0483(5) Uani 1 1 d . . . . .
C2 C 0.6684(2) 1.14098(11) 0.5482(3) 0.0493(6) Uani 1 1 d . . . . .
C7 C 0.9179(2) 0.89011(11) 0.9523(3) 0.0516(6) Uani 1 1 d . . . . .
C5 C 0.8619(2) 0.98243(11) 0.7542(3) 0.0481(5) Uani 1 1 d . . . . .
C10 C 1.2027(2) 0.83081(12) 0.6989(3) 0.0551(6) Uani 1 1 d . . . . .
H10 H 1.2622 0.7910 0.7235 0.066 Uiso 1 1 calc R U . . .
C13 C 0.5930(2) 1.07969(12) 0.8134(3) 0.0583(6) Uani 1 1 d . . . . .
H13A H 0.5468 1.1244 0.8279 0.070 Uiso 1 1 calc R U . . .
H13B H 0.6554 1.0666 0.9322 0.070 Uiso 1 1 calc R U . . .
C11 C 0.5548(2) 1.19831(11) 0.5054(3) 0.0588(6) Uani 1 1 d . . . . .
H11A H 0.5964 1.2403 0.4646 0.071 Uiso 1 1 calc R U . . .
H11B H 0.5269 1.2105 0.6168 0.071 Uiso 1 1 calc R U . . .
C15 C 0.9265(3) 0.83738(13) 1.1033(3) 0.0612(6) Uani 1 1 d . . . . .
H15A H 1.0259 0.8357 1.1786 0.073 Uiso 1 1 calc R U . . .
H15B H 0.9027 0.7908 1.0491 0.073 Uiso 1 1 calc R U . . .
C16 C 0.8272(3) 0.85323(15) 1.2253(3) 0.0772(8) Uani 1 1 d . . . . .
H16A H 0.8511 0.8988 1.2819 0.116 Uiso 1 1 calc R U . . .
H16B H 0.8391 0.8175 1.3189 0.116 Uiso 1 1 calc R U . . .
H16C H 0.7282 0.8535 1.1530 0.116 Uiso 1 1 calc R U . . .
C14 C 0.4756(3) 1.02293(14) 0.7523(4) 0.0722(7) Uani 1 1 d . . . . .
H14A H 0.4131 1.0357 0.6350 0.108 Uiso 1 1 calc R U . . .
H14B H 0.4195 1.0194 0.8412 0.108 Uiso 1 1 calc R U . . .
H14C H 0.5207 0.9781 0.7424 0.108 Uiso 1 1 calc R U . . .
C12 C 0.4196(3) 1.17673(14) 0.3580(4) 0.0851(9) Uani 1 1 d . . . . .
H12A H 0.4466 1.1637 0.2480 0.128 Uiso 1 1 calc R U . . .
H12B H 0.3528 1.2158 0.3324 0.128 Uiso 1 1 calc R U . . .
H12C H 0.3741 1.1371 0.4008 0.128 Uiso 1 1 calc R U . . .
H1X H 1.035(3) 0.9502(13) 0.596(4) 0.094(8) Uiso 1 1 d . . . . .
 
loop_
 _atom_site_aniso_label
 _atom_site_aniso_U_11
 _atom_site_aniso_U_22
 _atom_site_aniso_U_33
 _atom_site_aniso_U_23
 _atom_site_aniso_U_13
 _atom_site_aniso_U_12
N1 0.0482(10) 0.0471(11) 0.0525(11) 0.0026(9) 0.0108(9) 0.0008(8)
N2 0.0484(10) 0.0501(11) 0.0520(11) 0.0009(9) 0.0143(9) 0.0038(8)
C4 0.0430(11) 0.0491(13) 0.0499(13) -0.0038(10) 0.0108(10) -0.0025(10)
C8 0.0472(12) 0.0497(13) 0.0497(13) 0.0007(10) 0.0072(10) -0.0039(10)
C9 0.0570(13) 0.0498(13) 0.0587(14) 0.0078(11) 0.0138(12) 0.0031(11)
C1 0.0444(12) 0.0466(13) 0.0566(13) -0.0010(11) 0.0081(10) -0.0002(10)
C6 0.0473(12) 0.0574(14) 0.0534(13) -0.0025(11) 0.0149(10) -0.0037(11)
C3 0.0441(12) 0.0494(13) 0.0504(13) -0.0070(11) 0.0105(10) -0.0039(10)
C2 0.0422(11) 0.0475(13) 0.0561(13) -0.0068(11) 0.0086(10) -0.0008(10)
C7 0.0493(12) 0.0520(14) 0.0522(13) -0.0012(10) 0.0109(10) -0.0068(10)
C5 0.0425(11) 0.0501(13) 0.0514(13) -0.0019(10) 0.0117(10) -0.0028(10)
C10 0.0521(13) 0.0492(13) 0.0610(14) 0.0046(11) 0.0094(11) 0.0082(10)
C13 0.0582(14) 0.0580(14) 0.0605(14) -0.0073(11) 0.0189(12) 0.0032(11)
C11 0.0549(14) 0.0498(14) 0.0717(16) -0.0039(11) 0.0162(12) 0.0050(10)
C15 0.0652(15) 0.0611(15) 0.0562(14) 0.0083(11) 0.0137(12) -0.0031(11)
C16 0.0820(18) 0.0829(19) 0.0711(17) 0.0165(14) 0.0276(15) -0.0026(15)
C14 0.0613(15) 0.0795(18) 0.0807(18) -0.0061(14) 0.0273(13) -0.0120(13)
C12 0.0612(16) 0.0673(17) 0.113(2) 0.0010(16) -0.0018(16) 0.0107(13)
 
_geom_special_details
;
 All esds (except the esd in the dihedral angle between two l.s. planes)
 are estimated using the full covariance matrix.  The cell esds are taken
 into account individually in the estimation of esds in distances, angles
 and torsion angles; correlations between esds in cell parameters are only
 used when they are defined by crystal symmetry.  An approximate (isotropic)
 treatment of cell esds is used for estimating esds involving l.s. planes.
;
 
loop_
 _geom_bond_atom_site_label_1
 _geom_bond_atom_site_label_2
 _geom_bond_distance
 _geom_bond_site_symmetry_2
 _geom_bond_publ_flag
N1 C4 1.368(3) . ?
N1 C1 1.370(3) . ?
N2 C5 1.357(3) . ?
N2 C8 1.372(3) . ?
C4 C5 1.415(3) . ?
C4 C3 1.451(3) . ?
C8 C9 1.396(3) . ?
C8 C7 1.449(3) . ?
C9 C10 1.383(3) . ?
C1 C10 1.401(3) 3_776 ?
C1 C2 1.445(3) . ?
C6 C7 1.361(3) . ?
C6 C5 1.425(3) . ?
C3 C2 1.369(3) . ?
C3 C13 1.497(3) . ?
C2 C11 1.504(3) . ?
C7 C15 1.496(3) . ?
C10 C1 1.401(3) 3_776 ?
C13 C14 1.530(3) . ?
C11 C12 1.522(3) . ?
C15 C16 1.507(3) . ?
 
loop_
 _geom_angle_atom_site_label_1
 _geom_angle_atom_site_label_2
 _geom_angle_atom_site_label_3
 _geom_angle
 _geom_angle_site_symmetry_1
 _geom_angle_site_symmetry_3
 _geom_angle_publ_flag
C4 N1 C1 107.37(17) . . ?
C5 N2 C8 108.69(19) . . ?
N1 C4 C5 119.87(19) . . ?
N1 C4 C3 109.90(19) . . ?
C5 C4 C3 130.2(2) . . ?
N2 C8 C9 125.6(2) . . ?
N2 C8 C7 108.33(18) . . ?
C9 C8 C7 126.1(2) . . ?
C10 C9 C8 131.6(2) . . ?
N1 C1 C10 125.1(2) . 3_776 ?
N1 C1 C2 109.12(18) . . ?
C10 C1 C2 125.8(2) 3_776 . ?
C7 C6 C5 108.7(2) . . ?
C2 C3 C4 106.00(19) . . ?
C2 C3 C13 126.7(2) . . ?
C4 C3 C13 127.1(2) . . ?
C3 C2 C1 107.61(18) . . ?
C3 C2 C11 127.2(2) . . ?
C1 C2 C11 125.1(2) . . ?
C6 C7 C8 106.00(19) . . ?
C6 C7 C15 129.0(2) . . ?
C8 C7 C15 125.0(2) . . ?
N2 C5 C4 121.1(2) . . ?
N2 C5 C6 108.24(19) . . ?
C4 C5 C6 130.7(2) . . ?
C9 C10 C1 132.8(2) . 3_776 ?
C3 C13 C14 112.95(18) . . ?
C2 C11 C12 113.02(18) . . ?
C7 C15 C16 114.2(2) . . ?
 
_refine_diff_density_max    0.203
_refine_diff_density_min   -0.124
_refine_diff_density_rms    0.039

_shelx_res_file
;

    heotx.res created by SHELXL-2014/7

TITL heotx in P2(1)/c
CELL 0.71073   9.51680  18.85110   7.52510  90.0000 104.8757  90.0000
ZERR   2.00   0.00340   0.00680   0.00270   0.0000   0.0070   0.0000
LATT 1
SYMM -X, 0.5+Y, 0.5-Z
SFAC C  H  N
UNIT 64 76 8
L.S. 50
ACTA
BOND
FMAP 2
PLAN 5
TEMP   25.0
WGHT    0.073700    0.080500
FVAR       0.22020
MOLE 1
N1    3    0.852021    1.067816    0.513164    11.00000    0.04817    0.04711 =
         0.05254    0.00265    0.01078    0.00084
N2    3    0.967530    0.945009    0.704246    11.00000    0.04844    0.05007 =
         0.05196    0.00089    0.01429    0.00377
C4    1    0.800621    1.043787    0.656082    11.00000    0.04296    0.04907 =
         0.04993   -0.00379    0.01077   -0.00252
C8    1    1.005184    0.888118    0.820492    11.00000    0.04717    0.04969 =
         0.04974    0.00066    0.00720   -0.00394
C9    1    1.109702    0.837159    0.812228    11.00000    0.05699    0.04980 =
         0.05873    0.00781    0.01376    0.00307
AFIX  43
H9    2    1.118329    0.800973    0.898367    11.00000   -1.20000
AFIX   0
C1    1    0.774701    1.127555    0.445405    11.00000    0.04438    0.04663 =
         0.05664   -0.00101    0.00814   -0.00017
C6    1    0.831673    0.948448    0.909481    11.00000    0.04725    0.05737 =
         0.05343   -0.00250    0.01490   -0.00372
AFIX  43
H6    2    0.764148    0.963642    0.971300    11.00000   -1.20000
AFIX   0
C3    1    0.684298    1.089494    0.680251    11.00000    0.04411    0.04939 =
         0.05040   -0.00704    0.01049   -0.00387
C2    1    0.668426    1.140976    0.548247    11.00000    0.04225    0.04747 =
         0.05611   -0.00682    0.00861   -0.00083
C7    1    0.917935    0.890113    0.952345    11.00000    0.04932    0.05201 =
         0.05219   -0.00118    0.01090   -0.00682
C5    1    0.861912    0.982426    0.754154    11.00000    0.04250    0.05013 =
         0.05145   -0.00190    0.01171   -0.00280
C10   1    1.202743    0.830811    0.698949    11.00000    0.05214    0.04925 =
         0.06100    0.00459    0.00940    0.00822
AFIX  43
H10   2    1.262178    0.790956    0.723516    11.00000   -1.20000
AFIX   0
C13   1    0.592982    1.079695    0.813358    11.00000    0.05825    0.05802 =
         0.06052   -0.00726    0.01892    0.00320
AFIX  23
H13A  2    0.546841    1.124441    0.827875    11.00000   -1.20000
H13B  2    0.655364    1.066579    0.932213    11.00000   -1.20000
AFIX   0
C11   1    0.554780    1.198307    0.505359    11.00000    0.05495    0.04977 =
         0.07173   -0.00393    0.01617    0.00498
AFIX  23
H11A  2    0.596391    1.240332    0.464595    11.00000   -1.20000
H11B  2    0.526903    1.210450    0.616844    11.00000   -1.20000
AFIX   0
C15   1    0.926516    0.837377    1.103308    11.00000    0.06516    0.06106 =
         0.05625    0.00832    0.01371   -0.00311
AFIX  23
H15A  2    1.025871    0.835658    1.178571    11.00000   -1.20000
H15B  2    0.902722    0.790811    1.049082    11.00000   -1.20000
AFIX   0
C16   1    0.827219    0.853228    1.225336    11.00000    0.08196    0.08295 =
         0.07110    0.01653    0.02760   -0.00259
AFIX 137
H16A  2    0.851128    0.898811    1.281901    11.00000   -1.50000
H16B  2    0.839104    0.817478    1.318880    11.00000   -1.50000
H16C  2    0.728170    0.853493    1.152961    11.00000   -1.50000
AFIX   0
C14   1    0.475646    1.022933    0.752293    11.00000    0.06125    0.07955 =
         0.08074   -0.00614    0.02732   -0.01196
AFIX 137
H14A  2    0.413103    1.035701    0.634993    11.00000   -1.50000
H14B  2    0.419459    1.019409    0.841198    11.00000   -1.50000
H14C  2    0.520733    0.978063    0.742363    11.00000   -1.50000
AFIX   0
C12   1    0.419582    1.176730    0.358028    11.00000    0.06121    0.06726 =
         0.11341    0.00103   -0.00181    0.01071
AFIX 137
H12A  2    0.446582    1.163683    0.247976    11.00000   -1.50000
H12B  2    0.352803    1.215835    0.332386    11.00000   -1.50000
H12C  2    0.374107    1.137065    0.400815    11.00000   -1.50000
AFIX   0
H1X   2    1.035070    0.950206    0.595955    11.00000    0.09432
HKLF 4

REM  heotx in P2(1)/c
REM R1 =  0.0559 for    1587 Fo > 4sig(Fo)  and  0.1003 for all    2564 data
REM    170 parameters refined using      0 restraints

END

WGHT      0.0733      0.0898

REM Highest difference peak  0.203,  deepest hole -0.124,  1-sigma level  0.039
Q1    1   0.8572  1.0218  0.7432  11.00000  0.05    0.20
Q2    1   0.9939  0.9270  0.7600  11.00000  0.05    0.17
Q3    1   0.8267  1.0862  0.4566  11.00000  0.05    0.16
Q4    1   0.6356  1.1006  0.5588  11.00000  0.05    0.16
Q5    1   0.9138  1.0493  0.4815  11.00000  0.05    0.16
;
_shelx_res_checksum    7921

_shelx_hkl_file
;
   0   0  -1    0.06    0.06
   0   0  -1    0.02    0.05
   0   0  -1    0.01    0.06
   0   0  -1   -0.05    0.06
   0   0  -2  124.12    6.06
   0   0  -2  129.44    6.10
   0   0  -2  123.75    6.05
   0   0  -2  124.84    6.06
   0   0  -3    0.05    0.12
   0   0  -3    0.02    0.10
   0   0  -3   -0.22    0.12
   0   0  -3   -0.03    0.11
   0   0  -4   31.22    1.72
   0   0  -4   30.98    1.72
   0   0  -4   30.11    1.69
   0   0  -4   30.59    1.80
   0   0  -5   -0.01    0.13
   0   0  -5   -0.04    0.13
   0   0  -5   -0.27    0.13
   0   0  -6    2.58    0.42
   0   0   6    1.83    0.47
   0   0   6    2.43    0.63
   0   0  -6    3.09    0.50
   0   0  -7   -0.01    0.28
   0   0   7   -0.55    0.36
   0   0  -7    0.32    0.26
   0   0   8    2.57    0.78
   0   0  -8    2.88    0.61
   0   1   0    0.17    0.04
   0  -1   0    0.02    0.04
   0   1  -1   31.38    1.54
   0   1  -1   31.10    1.52
   0   1  -1   30.96    1.57
   0  -1  -1   31.68    1.56
   0  -1   1   31.06    1.56
   0  -1  -1   30.61    1.53
   0  -1  -1   30.89    1.53
   0  -1  -1   30.64    1.54
   0   1  -2    5.49    0.45
   0   1  -2    5.66    0.41
   0   1  -2    5.99    0.40
   0  -1  -2    5.60    0.42
   0  -1  -2    5.62    0.40
   0  -1  -2    5.98    0.42
   0  -1   2    6.15    0.45
   0  -1  -2    6.21    0.41
   0   1  -3    4.70    0.42
   0   1  -3    3.44    0.43
   0   1  -3    3.90    0.37
   0  -1  -3    4.17    0.38
   0  -1  -3    3.83    0.41
   0  -1  -3    4.06    0.40
   0  -1  -3    4.14    0.39
   0   1  -4    2.16    0.40
   0   1  -4    2.21    0.33
   0   1  -4    2.32    0.32
   0  -1  -4    2.14    0.32
   0  -1  -4    2.37    0.35
   0  -1  -4    1.79    0.32
   0  -1   4    1.77    0.36
   0  -1  -4    2.18    0.37
   0   1  -5    8.17    0.75
   0   1  -5    9.45    0.71
   0  -1  -5    9.52    0.72
   0  -1   5    9.54    0.82
   0  -1  -5    9.08    0.73
   0  -1  -5   10.33    0.76
   0   1  -6    0.44    0.26
   0   1   6    0.46    0.40
   0   1  -6    0.66    0.24
   0  -1  -6    0.39    0.22
   0  -1  -6    0.35    0.20
   0  -1   6    0.33    0.41
   0  -1  -6    0.19    0.23
   0  -1   6    0.51    0.29
   0   1  -7    1.81    0.43
   0   1   7    1.29    0.56
   0  -1  -7    1.44    0.40
   0  -1   7    1.10    0.61
   0  -1  -7    1.25    0.41
   0   1  -8    2.07    0.49
   0  -1   8    3.56    0.90
   0  -1  -8    1.61    0.52
   0   2   0  236.53   11.02
   0  -2   0  229.60   11.04
   0  -2   0  230.09   11.02
   0   2  -1    5.23    0.39
   0   2  -1    5.59    0.35
   0   2  -1    5.49    0.31
   0   2   1    6.01    0.42
   0  -2  -1    5.93    0.32
   0  -2  -1    5.87    0.38
   0  -2   1    5.92    0.38
   0  -2  -1    5.62    0.38
   0   2  -2   72.43    3.50
   0   2  -2   72.70    3.39
   0   2  -2   66.81    3.43
   0  -2  -2   65.93    3.43
   0  -2   2   72.16    3.47
   0  -2  -2   68.40    3.42
   0  -2  -2   70.86    3.42
   0  -2  -2   67.65    3.46
   0   2  -3    0.31    0.17
   0   2  -3    0.50    0.15
   0   2  -3    0.24    0.16
   0  -2  -3    0.49    0.16
   0  -2   3    0.36    0.18
   0  -2  -3    0.60    0.18
   0  -2  -3    0.45    0.16
   0  -2  -3    0.56    0.20
   0   2  -4    7.58    0.71
   0   2  -4    6.89    0.61
   0   2  -4    6.56    0.52
   0  -2  -4    6.82    0.55
   0  -2   4    5.99    0.62
   0  -2  -4    6.93    0.56
   0  -2  -4    7.10    0.63
   0  -2  -4    6.87    0.61
   0   2  -5    1.01    0.25
   0   2  -5    0.30    0.18
   0  -2   5    0.38    0.24
   0  -2  -5    0.31    0.17
   0  -2  -5    0.48    0.21
   0  -2   5   -0.02    0.34
   0  -2  -5    0.16    0.16
   0   2  -6   -0.23    0.18
   0   2  -6    0.42    0.21
   0   2   6    0.33    0.34
   0  -2  -6   -0.04    0.19
   0  -2  -6    0.43    0.25
   0  -2  -6    0.31    0.26
   0  -2   6    0.37    0.41
   0  -2   6    0.30    0.26
   0   2   7    0.32    0.44
   0   2  -7    0.50    0.32
   0  -2  -7    0.42    0.32
   0  -2   7    0.00    0.43
   0  -2  -7    1.01    0.35
   0   2  -8   -0.19    0.29
   0  -2   8   -0.24    0.49
   0   3   0    0.12    0.08
   0  -3   0    0.02    0.08
   0  -3   0    0.09    0.14
   0   3  -1   18.14    1.02
   0   3  -1   18.38    0.92
   0   3  -1   19.07    0.98
   0   3   1   18.57    1.04
   0  -3  -1   18.11    1.01
   0  -3  -1   19.87    1.01
   0  -3   1   18.31    1.01
   0   3  -2   48.71    2.33
   0   3   2   46.84    2.50
   0   3  -2   45.92    2.40
   0   3  -2   49.65    2.48
   0  -3  -2   48.03    2.36
   0  -3  -2   46.32    2.43
   0  -3   2   48.48    2.43
   0  -3  -2   45.66    2.41
   0   3  -3   40.75    2.32
   0   3  -3   43.46    2.17
   0   3   3   42.44    2.38
   0   3  -3   42.41    2.23
   0  -3  -3   43.83    2.27
   0  -3   3   42.07    2.27
   0  -3  -3   42.76    2.21
   0  -3  -3   42.82    2.24
   0   3  -4    2.87    0.46
   0   3  -4    2.81    0.34
   0   3  -4    2.44    0.37
   0  -3  -4    2.43    0.37
   0  -3  -4    2.73    0.38
   0  -3  -4    2.34    0.37
   0  -3   4    3.11    0.44
   0  -3  -4    3.02    0.41
   0   3  -5    0.60    0.23
   0   3  -5    0.49    0.24
   0  -3   5    0.42    0.35
   0  -3  -5    0.91    0.25
   0  -3   5    1.01    0.32
   0  -3  -5    0.37    0.22
   0  -3  -5    0.46    0.20
   0   3  -6   -0.34    0.15
   0   3   6   -0.13    0.32
   0  -3  -6    0.17    0.24
   0  -3  -6   -0.25    0.19
   0  -3   6   -0.05    0.23
   0  -3   6    0.08    0.40
   0  -3  -6    0.05    0.18
   0   3   7   -0.01    0.45
   0   3  -7    0.03    0.24
   0  -3  -7    0.21    0.28
   0  -3   7    0.25    0.45
   0   3  -8    2.28    0.54
   0   3   8    0.88    0.58
   0  -3   8    2.35    0.81
   0  -3  -8    2.07    0.53
   0   4   0  376.71   18.05
   0  -4   0  372.73   18.05
   0  -4   0  387.67   18.03
   0   4  -1   47.52    2.28
   0   4   1   47.64    2.40
   0   4  -1   46.35    2.38
   0   4  -1   49.24    2.36
   0  -4  -1   43.56    2.40
   0  -4  -1   48.08    2.38
   0  -4   1   47.38    2.40
   0   4  -2    8.75    0.70
   0   4  -2   11.27    0.66
   0   4  -2   10.79    0.57
   0   4   2   10.30    0.74
   0  -4  -2   10.65    0.58
   0  -4  -2    9.74    0.68
   0  -4   2   10.24    0.68
   0  -4  -2    9.37    0.67
   0   4  -3   15.36    1.02
   0   4   3   14.83    1.05
   0   4  -3   13.91    0.91
   0   4  -3   15.43    0.84
   0  -4  -3   14.81    0.94
   0  -4  -3   15.57    0.88
   0  -4  -3   14.25    0.95
   0  -4   3   13.93    0.94
   0   4   4    1.94    0.46
   0   4  -4    1.20    0.27
   0   4  -4    1.22    0.22
   0  -4  -4    1.55    0.30
   0  -4  -4    0.75    0.24
   0  -4  -4    1.05    0.25
   0  -4   4    1.51    0.32
   0   4   5   12.31    1.19
   0   4  -5   11.67    0.92
   0   4   5   11.73    1.07
   0   4  -5   13.94    0.86
   0  -4   5   13.86    0.98
   0  -4  -5   11.58    0.93
   0  -4  -5   12.75    0.93
   0  -4   5   14.58    1.38
   0   4   6    1.27    0.51
   0   4  -6    2.68    0.47
   0   4   6    1.98    0.58
   0  -4   6    2.39    0.78
   0  -4  -6    1.99    0.42
   0  -4  -6    1.99    0.43
   0   4  -7    5.13    0.69
   0   4   7    4.08    0.88
   0  -4  -7    4.63    0.66
   0  -4   7    4.53    1.02
   0   4  -8    4.58    0.72
   0   4   8    3.42    0.89
   0  -4   8    6.63    1.21
   0  -4  -8    6.04    0.79
   0   5   0    0.12    0.13
   0   5   0    0.02    0.13
   0  -5   0   -0.08    0.30
   0  -5   0    0.10    0.13
   0   5  -1    7.61    0.41
   0   5   1    6.83    0.52
   0   5  -1    6.60    0.47
   0  -5   1    6.64    0.57
   0  -5   1    6.64    0.60
   0  -5  -1    7.97    0.58
   0  -5  -1    7.13    0.49
   0   5  -2   45.96    2.38
   0   5   2   44.02    2.39
   0   5  -2   42.52    2.29
   0   5  -2   45.20    2.18
   0  -5  -2   45.97    2.34
   0  -5  -2   44.21    2.34
   0  -5   2   45.25    2.34
   0  -5  -2   43.68    2.18
   0   5  -3    4.87    0.56
   0   5  -3    4.81    0.46
   0   5   3    5.91    0.64
   0   5  -3    4.63    0.34
   0  -5  -3    4.78    0.50
   0  -5  -3    4.45    0.37
   0  -5   3    5.37    0.50
   0  -5  -3    4.66    0.49
   0   5  -4    3.87    0.35
   0   5   4    4.73    0.66
   0   5  -4    2.35    0.39
   0  -5   4    3.97    0.50
   0  -5  -4    3.91    0.48
   0  -5  -4    3.22    0.46
   0   5   5    1.74    0.44
   0   5  -5    1.75    0.36
   0   5   5    2.12    0.53
   0  -5   5    1.34    0.52
   0  -5  -5    2.03    0.37
   0  -5  -5    1.35    0.35
   0  -5   5    1.13    0.34
   0   5   6    2.87    0.73
   0   5  -6    4.12    0.61
   0  -5  -6    3.59    0.58
   0  -5   6    1.87    0.69
   0  -5  -6    3.66    0.52
   0   5   7   -0.18    0.46
   0   5  -7    0.43    0.29
   0  -5  -7    0.18    0.27
   0  -5   7    0.32    0.53
   0   5   8   -0.66    0.55
   0   5  -8    0.21    0.32
   0  -5  -8    0.08    0.31
   0  -5   8    0.11    0.46
   0   6   0   62.36    3.19
   0   6   0   64.50    3.12
   0  -6   0   64.97    3.14
   0  -6   0   58.55    3.19
   0   6  -1    5.94    0.40
   0   6  -1    7.54    0.49
   0   6   1    6.24    0.50
   0  -6   1    6.35    0.60
   0  -6  -1    7.02    0.49
   0  -6   1    6.76    0.59
   0  -6  -1    6.68    0.56
   0   6  -2   41.45    2.15
   0   6  -2   42.58    2.02
   0   6   2   40.56    2.24
   0  -6   2   41.74    2.21
   0  -6  -2   42.08    2.22
   0  -6  -2   37.66    2.17
   0   6  -3    8.76    0.51
   0   6   3    8.57    0.78
   0   6  -3    7.21    0.61
   0  -6   3    8.84    0.69
   0  -6  -3    8.68    0.53
   0  -6  -3    8.68    0.67
   0  -6  -3    8.01    0.66
   0   6   4    0.31    0.27
   0   6  -4    0.17    0.11
   0   6  -4    0.12    0.14
   0  -6  -4    0.23    0.17
   0  -6   4   -0.46    0.25
   0  -6   4    0.22    0.21
   0  -6  -4   -0.12    0.14
   0   6  -5    1.51    0.34
   0   6   5    0.85    0.39
   0  -6   5    1.07    0.32
   0  -6  -5    0.53    0.27
   0  -6   5    1.39    0.58
   0  -6  -5    0.70    0.23
   0   6   6    4.50    0.85
   0   6  -6    5.30    0.68
   0  -6  -6    3.56    0.59
   0  -6   6    3.34    0.84
   0  -6  -6    5.76    0.66
   0   6   7    2.21    0.77
   0   6  -7    4.25    0.69
   0  -6   7    4.76    1.07
   0  -6  -7    3.81    0.64
   0   6   8    1.17    0.67
   0   6  -8    0.91    0.44
   0  -6   8    1.64    0.80
   0  -6  -8    1.26    0.47
   0   7   0    0.25    0.15
   0   7   0    0.09    0.13
   0  -7   0    0.22    0.15
   0  -7   0    0.30    0.27
   0   7   1    9.95    0.69
   0   7  -1    9.07    0.65
   0   7  -1   10.71    0.59
   0  -7   1   10.04    0.78
   0  -7   1   11.14    0.79
   0  -7  -1    9.15    0.75
   0  -7  -1    9.79    0.67
   0   7   2   14.40    0.95
   0   7  -2   13.19    0.85
   0   7  -2   14.21    0.73
   0  -7  -2   13.19    0.89
   0  -7   2   12.63    1.04
   0  -7   2   14.94    0.96
   0  -7  -2   12.45    0.91
   0   7  -3    7.44    0.47
   0   7  -3    8.16    0.61
   0   7   3    8.08    0.77
   0  -7   3    7.02    0.87
   0  -7   3    7.75    0.69
   0  -7  -3    7.43    0.69
   0  -7  -3    7.65    0.64
   0   7   4    6.10    0.56
   0   7  -4    6.65    0.62
   0   7   4    6.22    0.75
   0  -7  -4    5.50    0.62
   0  -7   4    4.33    0.79
   0  -7   4    4.93    0.60
   0  -7  -4    6.87    0.68
   0   7   5   12.25    1.21
   0   7  -5   14.82    1.03
   0  -7   5   13.04    1.02
   0  -7  -5   12.94    1.02
   0  -7  -5   14.55    1.05
   0  -7   5   13.09    1.45
   0   7  -6    1.21    0.36
   0   7   6    1.41    0.54
   0  -7  -6    1.15    0.39
   0  -7   6    0.74    0.60
   0  -7  -6    1.84    0.41
   0   7   7    0.68    0.55
   0   7  -7    1.07    0.42
   0  -7   7    1.09    0.65
   0  -7  -7    0.35    0.33
   0   7   8   -0.25    0.61
   0   7  -8    0.19    0.38
   0  -7   8    0.46    0.71
   0  -7  -8    0.48    0.39
   0   8   0   73.32    3.59
   0   8   0   70.70    3.66
   0  -8   0   67.79    3.69
   0  -8   0   74.23    3.62
   0   8   1    9.12    0.65
   0   8  -1    8.75    0.55
   0   8  -1    7.55    0.59
   0  -8  -1   10.06    0.64
   0  -8   1    7.71    0.74
   0  -8  -1    9.04    0.74
   0  -8   1    8.66    0.76
   0   8   2    0.21    0.22
   0   8  -2   -0.09    0.11
   0   8  -2    0.01    0.08
   0  -8   2    0.29    0.24
   0  -8   2    0.18    0.29
   0  -8  -2   -0.37    0.14
   0  -8  -2    0.11    0.18
   0   8   3   11.20    0.92
   0   8  -3   10.92    0.58
   0   8  -3    9.48    0.73
   0  -8  -3   10.85    0.83
   0  -8  -3    8.47    0.74
   0  -8   3    9.48    0.80
   0  -8   3    7.85    0.97
   0   8  -4    1.14    0.28
   0   8   4    0.75    0.35
   0  -8   4    1.27    0.49
   0  -8  -4    0.63    0.28
   0  -8   4    2.27    0.44
   0  -8  -4    1.09    0.30
   0   8  -5    0.73    0.27
   0   8   5    0.73    0.39
   0  -8  -5    0.71    0.26
   0  -8  -5    0.87    0.31
   0  -8   5    0.35    0.40
   0  -8   5    1.03    0.37
   0   8  -6    5.65    0.75
   0   8   6    3.99    0.81
   0  -8  -6    5.91    0.76
   0  -8  -6    6.12    0.73
   0  -8   6    5.72    1.12
   0   8   7    0.12    0.49
   0   8  -7    0.25    0.25
   0  -8   7    0.14    0.56
   0  -8  -7    0.23    0.34
   0   8  -8   -0.10    0.34
   0  -8   8   -0.01    0.71
   0  -8  -8   -0.09    0.33
   0   9   0   -0.11    0.13
   0   9   0   -0.14    0.16
   0  -9   0   -0.03    0.31
   0  -9   0   -0.02    0.16
   0   9   1    5.40    0.51
   0   9  -1    4.74    0.37
   0   9  -1    4.39    0.44
   0  -9  -1    4.64    0.58
   0  -9  -1    4.77    0.45
   0  -9   1    5.17    0.60
   0  -9   1    4.37    0.55
   0  -9  -1    3.69    0.34
   0   9  -2    0.38    0.19
   0   9  -2    0.68    0.12
   0   9   2    0.82    0.28
   0  -9  -2    0.68    0.29
   0  -9   2    0.46    0.33
   0  -9  -2    0.51    0.21
   0  -9   2    0.38    0.34
   0   9   3    1.22    0.35
   0   9  -3    1.20    0.28
   0  -9   3    0.91    0.39
   0  -9   3    1.10    0.39
   0  -9  -3    1.21    0.33
   0  -9  -3    1.36    0.34
   0   9   4    0.68    0.35
   0   9  -4    0.55    0.23
   0  -9  -4    0.29    0.25
   0  -9   4    0.27    0.31
   0  -9   4    0.57    0.39
   0  -9  -4    0.23    0.21
   0   9   5   12.09    1.17
   0   9  -5   10.85    0.98
   0  -9  -5   11.33    1.03
   0  -9   5   12.08    1.42
   0  -9   5   10.52    1.00
   0  -9  -5   12.35    0.97
   0   9  -6    0.12    0.27
   0   9   6    0.24    0.39
   0  -9  -6    0.00    0.28
   0  -9   6   -0.29    0.45
   0  -9  -6    0.21    0.24
   0   9   7    0.06    0.51
   0   9  -7    0.44    0.36
   0  -9  -7    0.11    0.31
   0  -9   7    0.48    0.61
   0   9  -8   -0.15    0.36
   0  -9  -8    0.34    0.40
   0  -9   8   -0.15    0.67
   0  10   0   31.92    1.77
   0  10   0   32.21    1.85
   0 -10   0   31.01    1.90
   0 -10   0   33.29    1.80
   0  10   1   -0.17    0.20
   0  10   1   -0.12    0.16
   0  10  -1    0.16    0.11
   0  10  -1   -0.07    0.12
   0 -10  -1   -0.16    0.26
   0 -10  -1   -0.05    0.14
   0 -10   1   -0.32    0.16
   0 -10   1    0.56    0.40
   0  10   2    0.69    0.27
   0  10  -2    0.81    0.15
   0  10  -2    1.30    0.28
   0 -10   2    1.14    0.39
   0 -10   2    0.39    0.36
   0 -10  -2    0.65    0.24
   0 -10  -2    0.41    0.30
   0  10   3    5.04    0.66
   0  10  -3    5.67    0.58
   0 -10  -3    5.06    0.64
   0 -10  -3    5.21    0.60
   0 -10   3    3.72    0.72
   0 -10   3    4.83    0.67
   0  10   4    1.06    0.38
   0  10  -4    1.02    0.32
   0 -10   4    1.01    0.47
   0 -10   4    1.04    0.43
   0 -10  -4    1.48    0.37
   0 -10  -4    1.09    0.35
   0  10  -5    1.25    0.36
   0  10   5    0.63    0.41
   0 -10  -5    1.67    0.43
   0 -10   5    2.02    0.71
   0 -10   5    0.74    0.43
   0 -10  -5    1.52    0.40
   0  10  -6    0.89    0.38
   0  10   6   -0.08    0.41
   0 -10  -6    0.59    0.28
   0 -10  -6    0.61    0.36
   0 -10   6    0.88    0.54
   0  10   7    0.37    0.53
   0  10  -7    0.76    0.38
   0 -10   7   -0.02    0.59
   0 -10  -7    0.40    0.37
   0  10  -8   -1.05    0.34
   0 -10   8   -0.06    0.75
   0 -10  -8   -0.10    0.37
   0  11   0   -0.03    0.16
   0  11   0    0.19    0.20
   0 -11   0   -0.27    0.30
   0 -11   0    0.33    0.21
   0  11  -1    3.07    0.34
   0  11  -1    2.51    0.38
   0  11   1    2.67    0.53
   0  11   1    3.97    0.46
   0 -11  -1    2.96    0.33
   0 -11  -1    3.64    0.56
   0 -11   1    3.16    0.60
   0 -11   1    2.18    0.44
   0  11   2   13.92    0.98
   0  11  -2   12.08    0.89
   0 -11   2   12.89    1.11
   0 -11  -2   13.34    1.06
   0 -11   2   13.36    1.10
   0 -11  -2   12.87    0.92
   0  11   3   -0.20    0.22
   0  11  -3    0.22    0.18
   0 -11   3    0.62    0.42
   0 -11  -3    0.32    0.27
   0 -11  -3    0.28    0.25
   0 -11   3   -0.06    0.28
   0  11  -4    6.26    0.69
   0  11   4    4.35    0.69
   0 -11   4    6.01    0.98
   0 -11  -4    5.94    0.72
   0 -11  -4    4.32    0.64
   0 -11   4    5.28    0.74
   0  11   5    0.06    0.35
   0  11  -5    0.05    0.25
   0 -11   5   -0.32    0.41
   0 -11   5    0.21    0.43
   0 -11  -5    0.26    0.24
   0 -11  -5    0.75    0.33
   0  11   6    0.11    0.46
   0  11  -6    0.16    0.29
   0 -11  -6   -0.24    0.27
   0 -11  -6    0.24    0.23
   0 -11   6    0.70    0.52
   0  11  -7   -0.18    0.31
   0  11   7   -0.47    0.53
   0 -11  -7    0.10    0.26
   0 -11  -7    0.42    0.29
   0 -11   7   -0.03    0.61
   0  12   0    0.09    0.18
   0  12   0   -0.17    0.15
   0 -12   0    0.13    0.20
   0 -12   0   -0.05    0.37
   0  12   1    2.44    0.54
   0  12   1    4.53    0.51
   0  12  -1    4.04    0.41
   0  12  -1    3.85    0.48
   0 -12  -1    3.29    0.60
   0 -12   1    3.62    0.64
   0 -12   1    3.92    0.57
   0  12   2   16.67    1.15
   0  12  -2   16.98    1.14
   0 -12  -2   15.29    1.26
   0 -12  -2   19.00    1.18
   0 -12   2   17.70    1.30
   0 -12   2   17.19    1.34
   0  12  -3    0.63    0.28
   0  12   3    1.00    0.37
   0 -12   3    1.32    0.46
   0 -12  -3    1.01    0.30
   0 -12   3    0.50    0.46
   0 -12  -3    1.09    0.39
   0  12  -4   -0.31    0.19
   0  12   4    0.18    0.32
   0 -12   4    0.24    0.41
   0 -12  -4   -0.02    0.27
   0 -12   4   -0.26    0.43
   0 -12  -4    0.15    0.25
   0  12  -5    0.32    0.29
   0  12   5    0.70    0.45
   0 -12  -5    0.94    0.36
   0 -12  -5    0.97    0.40
   0 -12   5    1.20    0.61
   0 -12   5    1.08    0.54
   0  12  -6    0.31    0.32
   0  12   6   -0.11    0.43
   0 -12  -6    1.11    0.35
   0 -12  -6    0.67    0.35
   0 -12   6    0.55    0.56
   0  12  -7    0.07    0.32
   0  12   7    0.36    0.57
   0 -12  -7    0.80    0.47
   0 -12   7   -0.13    0.56
   0 -12  -7    0.58    0.37
   0  13   0    0.09    0.18
   0  13   0   -0.09    0.20
   0 -13   0   -0.30    0.20
   0 -13   0    0.19    0.40
   0  13   1    0.12    0.21
   0  13  -1   -0.29    0.16
   0  13  -1    0.04    0.16
   0  13   1    0.18    0.29
   0 -13   1    0.33    0.27
   0 -13   1    0.61    0.45
   0 -13  -1    0.13    0.35
   0  13  -2    0.47    0.23
   0  13   2    0.75    0.43
   0  13   2    0.71    0.31
   0 -13   2   -0.20    0.28
   0 -13  -2    0.61    0.38
   0 -13   2    1.20    0.52
   0  13  -3    5.24    0.62
   0  13   3    4.80    0.67
   0 -13   3    3.22    0.74
   0 -13  -3    4.99    0.65
   0 -13   3    5.36    0.89
   0 -13  -3    4.87    0.72
   0  13   4    3.06    0.62
   0  13  -4    3.51    0.56
   0 -13   4    2.25    0.68
   0 -13  -4    2.93    0.59
   0 -13  -4    3.35    0.60
   0 -13   4    2.80    0.70
   0  13  -5    0.29    0.27
   0  13   5   -0.35    0.34
   0 -13   5   -0.37    0.47
   0 -13  -5    0.22    0.25
   0 -13   5   -0.09    0.49
   0 -13  -5   -0.09    0.26
   0  13  -6    1.87    0.52
   0  13   6    1.93    0.65
   0 -13   6    1.38    0.70
   0 -13  -6    1.05    0.45
   0 -13  -6    1.55    0.48
   0  13  -7    0.56    0.40
   0 -13  -7   -0.33    0.26
   0 -13   7   -0.12    0.51
   0 -13  -7   -0.29    0.43
   0  14   0    0.43    0.27
   0  14   0    0.66    0.28
   0 -14   0    0.16    0.41
   0  14   1    4.78    0.58
   0  14   1    4.57    0.70
   0  14  -1    3.64    0.51
   0 -14  -1    3.22    0.65
   0 -14   1    4.12    0.80
   0 -14   1    3.54    0.60
   0  14   2    4.52    0.59
   0  14  -2    3.62    0.53
   0  14   2    3.76    0.79
   0 -14  -2    3.96    0.71
   0 -14   2    4.25    0.79
   0 -14   2    4.03    0.71
   0  14   3    1.73    0.45
   0  14  -3    1.32    0.36
   0 -14  -3    2.07    0.48
   0 -14   3    1.93    0.61
   0 -14   3    2.37    0.69
   0  14  -4    4.43    0.62
   0  14   4    2.90    0.61
   0 -14  -4    3.49    0.62
   0 -14  -4    2.88    0.58
   0 -14   4    4.24    0.90
   0 -14   4    2.34    0.70
   0  14   5    0.11    0.42
   0  14  -5   -0.08    0.26
   0 -14   5   -0.11    0.47
   0 -14  -5    0.09    0.35
   0 -14  -5    0.31    0.30
   0 -14   5   -0.46    0.43
   0  14  -6    0.19    0.32
   0  14   6    0.59    0.54
   0 -14  -6   -0.06    0.21
   0 -14  -6    0.16    0.40
   0 -14   6    0.25    0.53
   0  14  -7   -0.05    0.35
   0 -14  -7   -0.26    0.38
   0 -14  -7   -0.07    0.37
   0 -14   7    0.23    0.71
   0  15   0    0.18    0.25
   0  15   0   -0.04    0.21
   0 -15   0   -0.02    0.45
   0  15   1   14.69    1.21
   0  15   1   15.34    1.09
   0  15  -1   14.48    1.05
   0 -15  -1   13.11    1.27
   0 -15   1   13.72    1.30
   0 -15   1   16.76    1.21
   0  15   2    1.02    0.53
   0  15   2    0.81    0.33
   0  15  -2    0.70    0.28
   0 -15   2    0.43    0.55
   0 -15  -2    0.71    0.41
   0 -15   2   -0.02    0.31
   0  15  -3    7.21    0.78
   0  15   3    8.69    1.24
   0  15   3    5.19    0.72
   0 -15   3    6.91    0.98
   0 -15  -3    7.00    0.91
   0 -15   3    6.69    1.01
   0  15  -4    0.24    0.27
   0  15   4    0.27    0.34
   0 -15   4    0.01    0.51
   0 -15  -4    0.05    0.25
   0 -15   4    0.54    0.45
   0  15   5    0.20    0.42
   0  15  -5    0.11    0.30
   0 -15   5    0.84    0.56
   0 -15  -5    0.02    0.27
   0  15   6   -0.19    0.45
   0  15  -6    0.63    0.40
   0 -15  -6   -0.10    0.26
   0 -15   6    0.63    0.70
   0  16   0   -0.19    0.22
   0  16   0    0.62    0.24
   0 -16   0    0.03    0.44
   0  16   1   16.89    1.13
   0  16  -1   14.69    1.09
   0  16   1   16.17    1.29
   0 -16   1   12.85    1.31
   0 -16  -1   13.76    1.35
   0  16   2    7.85    0.85
   0  16   2   10.53    1.23
   0  16  -2    8.98    0.86
   0 -16   2    8.27    1.05
   0 -16   2    9.75    1.13
   0 -16  -2    9.21    1.07
   0  16   3   -0.01    0.48
   0  16  -3    0.12    0.23
   0  16   3   -0.10    0.28
   0 -16   3   -0.12    0.48
   0 -16   3    0.69    0.45
   0 -16  -3    0.19    0.32
   0  16   4    0.10    0.38
   0  16  -4    0.15    0.29
   0  16   4    0.46    0.58
   0 -16   4    0.19    0.54
   0 -16  -4    0.86    0.37
   0 -16   4   -0.23    0.52
   0  16   5    0.42    0.69
   0  16  -5    0.26    0.30
   0  16   5    0.07    0.45
   0 -16  -5    0.60    0.33
   0 -16   5    1.18    0.69
   0  16   6    0.09    0.82
   0  16  -6   -0.22    0.34
   0 -16  -6    0.32    0.33
   0 -16   6   -1.10    0.56
   0  17   0    0.40    0.30
   0 -17   0    0.05    0.45
   0  17   1    0.17    0.26
   0  17   1    1.12    0.45
   0  17  -1    0.60    0.31
   0 -17  -1    0.70    0.48
   0 -17   1    0.15    0.50
   0  17   2    2.66    0.52
   0  17   2    0.59    0.47
   0  17  -2    1.99    0.45
   0 -17  -2    1.57    0.52
   0 -17   2    2.27    0.72
   0  17  -3    0.36    0.30
   0  17   3    0.31    0.35
   0  17   3    1.00    0.54
   0 -17   3    0.61    0.48
   0 -17   3    1.27    0.62
   0 -17  -3    0.27    0.35
   0  17  -4   -0.07    0.28
   0  17   4    0.44    0.61
   0  17   4    0.49    0.38
   0 -17  -4    1.37    0.45
   0 -17   4    0.99    0.58
   0 -17   4    0.84    0.64
   0  17   5   -0.12    0.43
   0  17   5    1.72    0.79
   0  17  -5    0.34    0.32
   0 -17  -5    0.60    0.37
   0 -17   5    1.74    0.71
   0  17  -6    0.75    0.41
   0  17   6    0.40    0.79
   0 -17  -6    0.07    0.35
   0 -17   6    0.43    0.70
   0  18   0    1.66    0.45
   0 -18   0    2.21    0.69
   0  18   1    3.02    0.66
   0  18  -1    2.82    0.52
   0  18   1    3.54    0.59
   0 -18   1    2.89    0.76
   0 -18  -1    2.94    0.72
   0  18   2    0.83    0.42
   0  18   2   -0.10    0.46
   0  18  -2    0.35    0.31
   0 -18  -2    0.42    0.44
   0 -18   2    0.38    0.55
   0  18   3   -0.29    0.57
   0  18  -3    0.15    0.30
   0  18   3   -0.44    0.27
   0 -18   3    0.05    0.46
   0 -18   3   -0.04    0.49
   0 -18  -3    0.07    0.35
   0  18   4    1.25    0.48
   0  18  -4    0.80    0.38
   0  18   4    2.53    0.86
   0 -18  -4    2.31    0.60
   0 -18   4    0.84    0.70
   0 -18   4    2.72    0.88
   0  18   5   -0.07    0.46
   0  18  -5   -0.15    0.25
   0  18   5   -0.28    0.74
   0 -18   5   -0.99    0.50
   0 -18  -5    0.60    0.38
   0  19   0   -0.14    0.27
   0 -19   0    0.39    0.54
   0  19  -1    4.27    0.65
   0  19   1    3.82    0.62
   0 -19  -1    4.91    0.91
   0 -19   1    2.43    0.71
   0  19   2    2.09    0.51
   0  19   2    2.87    0.75
   0  19  -2    1.22    0.40
   0 -19   2    1.74    0.66
   0 -19  -2    1.65    0.55
   0  19   3    1.24    0.64
   0  19  -3    0.09    0.27
   0  19   3   -0.69    0.26
   0 -19  -3    0.95    0.41
   0 -19   3    0.44    0.60
   0  19  -4    0.21    0.30
   0  19   4    0.09    0.73
   0  19   4   -0.34    0.32
   0 -19   4   -0.22    0.57
   0 -19   4    0.35    0.56
   0 -19  -4    0.18    0.38
   0  19  -5    0.46    0.38
   0  19   5    0.37    0.79
   0 -19   5   -0.03    0.65
   0 -19  -5    0.76    0.53
   0  20   0    0.13    0.30
   0 -20   0    0.44    0.55
   0  20  -1    6.60    0.84
   0  20   1    7.44    0.86
   0 -20  -1    8.27    1.17
   0 -20   1    7.96    1.13
   0  20   2   -0.32    0.44
   0  20   2    0.12    0.33
   0  20  -2    0.59    0.31
   0 -20   2    0.77    0.61
   0 -20  -2    0.58    0.38
   0  20   3    0.41    0.42
   0  20  -3    0.39    0.36
   0  20   3    0.11    0.60
   0 -20   3    0.49    0.57
   0 -20  -3    2.63    0.62
   0  20   4    0.84    0.75
   0  20  -4    0.61    0.41
   0  20   4    0.32    0.43
   0 -20   4    0.14    0.66
   0 -20  -4   -0.22    0.38
   0  21   0    0.34    0.31
   0 -21   0   -1.29    0.41
   0  21   1    0.43    0.40
   0  21  -1    0.50    0.35
   0 -21  -1    0.20    0.61
   0 -21   1    0.15    0.51
   0  21  -2    0.30    0.33
   0  21   2    0.63    0.36
   0 -21   2    0.47    0.58
   0 -21  -2    1.34    0.43
   0  21  -3    0.59    0.39
   0  21   3    1.48    0.51
   0  21   3    1.00    0.77
   0 -21   3    0.60    0.62
   0 -21  -3    2.47    0.64
   0  22   0    0.68    0.42
   0 -22   0    0.98    0.69
   0  22   1    0.19    0.37
   0  22  -1    0.04    0.35
   0 -22  -1    0.24    0.49
   0 -22   1    0.42    0.59
   0  22  -2    0.19    0.34
   0  22   2    0.46    0.39
   0 -22  -2    0.31    0.42
   0 -22   2    0.46    0.62
   0  23   0    0.19    0.38
   0 -23   0    0.58    0.63
   0  23   1    0.76    0.42
   0  23  -1   -0.07    0.34
   0 -23  -1    0.20    0.56
   0 -23   1    0.48    0.64
   1   0  -9   -0.07    0.41
  -1   0   8    2.24    0.73
   1   0  -8    2.48    0.55
   1   0  -7   -0.16    0.19
  -1   0   7    0.31    0.41
   1   0  -7    0.26    0.27
  -1   0   6   -0.14    0.30
   1   0  -6    0.13    0.21
   1   0  -6   -0.08    0.14
  -1   0   5    0.22    0.26
   1   0  -5    0.13    0.15
   1   0  -5    0.28    0.19
   1   0  -5    0.16    0.13
   1   0  -4   17.40    1.09
   1   0  -4   16.90    0.99
  -1   0   4   15.98    1.22
   1   0  -4   19.04    1.11
   1   0  -3    0.02    0.11
  -1   0   3    0.08    0.19
   1   0  -3    0.02    0.08
   1   0  -3   -0.13    0.11
  -1   0   2   63.54    3.21
   1   0  -2   61.30    3.11
   1   0  -2   64.11    3.04
   1   0  -2   62.52    3.12
   1   0  -1   -0.04    0.08
  -1   0   1   -0.04    0.11
   1   0  -1    0.03    0.07
  -1   0   0  172.67    8.21
   1   0   0  172.68    8.21
  -1   0   0  172.18    8.21
   1   0   1    0.03    0.11
  -1   0  -1    0.01    0.07
  -1   0  -1    0.08    0.06
  -1   0  -1    0.01    0.08
  -1   0  -2    3.89    0.36
  -1   0  -2    3.50    0.36
  -1   0  -2    4.05    0.32
  -1   0  -2    4.13    0.31
  -1   0  -3    0.20    0.11
  -1   0  -3    0.05    0.12
  -1   0  -3    0.02    0.12
  -1   0  -3    0.29    0.13
  -1   0  -4   11.30    0.87
  -1   0  -4   12.07    0.81
  -1   0  -4   13.55    0.83
  -1   0  -4   11.47    0.84
  -1   0  -5   -0.24    0.13
  -1   0  -5   -0.11    0.15
  -1   0  -5    0.03    0.18
  -1   0  -5   -0.25    0.13
   1   0   6    0.55    0.37
  -1   0  -6    1.09    0.28
  -1   0  -6    1.70    0.45
  -1   0  -6    0.98    0.32
  -1   0  -7    0.17    0.28
   1   0   8    0.20    0.51
  -1   0  -8   -0.15    0.27
   1   1  -9    0.15    0.40
   1   1  -8   -0.08    0.27
  -1  -1   8    0.17    0.46
   1  -1  -8    0.70    0.38
   1  -1  -8   -0.32    0.28
  -1   1   7    0.65    0.42
   1   1  -7   -0.04    0.23
   1   1  -7    0.49    0.31
   1  -1  -7    0.50    0.29
   1  -1  -7    0.50    0.28
  -1  -1   7    0.52    0.51
  -1   1   6    4.42    0.77
   1   1  -6    7.47    0.75
   1   1  -6    5.62    0.63
   1  -1  -6    5.70    0.65
   1  -1  -6    5.73    0.69
  -1  -1   6    5.97    0.91
   1   1  -5    6.43    0.60
  -1   1   5    5.23    0.74
   1   1  -5    6.16    0.63
  -1  -1   5    5.79    0.81
   1  -1  -5    6.09    0.63
   1  -1  -5    6.30    0.51
   1  -1  -5    5.41    0.61
  -1  -1   5    5.76    0.59
   1   1  -4   -0.02    0.15
  -1   1   4    0.12    0.19
   1   1  -4   -0.05    0.10
  -1  -1   4    0.05    0.15
  -1  -1   4    0.44    0.26
   1  -1  -4   -0.04    0.09
   1  -1  -4   -0.03    0.14
   1  -1  -4   -0.16    0.11
  -1   1   3   11.45    0.81
   1   1  -3   10.60    0.70
   1   1  -3   11.05    0.72
   1  -1  -3   11.09    0.72
   1  -1  -3   10.90    0.65
   1  -1  -3   10.20    0.70
  -1  -1   3   10.28    0.84
  -1  -1   3   10.33    0.67
  -1   1   2   37.97    1.98
   1   1  -2   38.17    1.93
   1   1  -2   37.42    1.94
  -1  -1   2   37.12    2.04
   1  -1  -2   38.83    1.93
  -1  -1   2   38.02    1.87
   1  -1  -2   37.61    1.87
   1  -1  -2   36.91    1.94
  -1   1   1  211.36    9.91
   1   1  -1  214.99    9.89
  -1   1   1  215.27    9.96
   1   1  -1  201.81    9.89
  -1  -1   1  215.73    9.97
   1  -1  -1  185.38    9.90
   1  -1  -1  210.23    9.89
   1   1   0   96.89    4.57
  -1   1   0   91.45    4.55
  -1   1   0   91.98    4.56
   1  -1   0   95.66    4.59
  -1  -1   0   97.68    4.57
   1  -1   0   94.69    4.54
  -1  -1   0   97.57    4.57
  -1   1  -1    5.99    0.40
  -1   1  -1    5.37    0.34
   1   1   1    5.72    0.44
   1  -1   1    5.42    0.43
  -1  -1  -1    5.37    0.39
  -1  -1  -1    5.52    0.37
  -1  -1  -1    5.97    0.33
   1  -1   1    6.08    0.38
  -1   1  -2    0.43    0.13
  -1   1  -2    0.40    0.12
  -1   1  -2    0.28    0.16
  -1  -1  -2    0.44    0.15
  -1  -1  -2    0.29    0.13
  -1  -1  -2    0.46    0.12
  -1  -1  -2    0.46    0.15
  -1   1  -3    5.13    0.44
  -1   1  -3    5.34    0.40
  -1   1  -3    5.49    0.52
  -1  -1  -3    5.23    0.45
  -1  -1  -3    4.93    0.42
  -1  -1  -3    4.59    0.47
  -1  -1  -3    3.63    0.44
  -1   1  -4   13.32    0.84
  -1   1  -4   12.16    0.94
  -1   1  -4   13.26    0.87
  -1  -1  -4   12.82    0.85
  -1  -1  -4   12.62    0.87
[truncated: 361,358 more chars]
